# Supplementary material for: Seed Train Optimization in Microcarrier-Based Cell Culture Post In Situ Cell Detachment through Scale-Down Hybrid Modeling
Source: Bioengineering (Basel). 2024 Mar 9;11(3):268. doi: 10.3390/bioengineering11030268 (PMC10968011; doi:10.3390/bioengineering11030268)
Supplement: Supplementary file 1 [file bioengineering-11-00268-s001.zip › File S1.xlsx]

## Sheet: Tabelle1
Inocuation time[h]	DO.PV[%DO]	F.PV[sL/h]	FAir.PV[sL/h]	FCO2.PV[sL/h]	FO2.PV[sL/h]	N.PV[rpm]	N.PV[rpm]-setpoint	pH.PV[pH]	T.PV[°C]	XCO2.PV[%]	XO2.PV[%]	Cells/bead	setpoint cells/bead	Bead concentration(g/l)	Volume(ml)	Measured Glucose conc(g/l)	Measured Glucose content(g)	Glucose addition by medium exchange	New glucose content after media addition(g)	New glucose conc. After media addition(g/l)	glucose consumption(g/l)	Glucose consuption rate(g/l/hr)	Cell concentration(cells/ml) - Nuclecounter	Cell concentration(cells/ml)-CV assay	Glucose consumtion(g)/cell	acumulated glucose consumption	DNA(ng/ml)	lactate(g/l)	lactate(mM)	PD	PDT(hr)	Âµ(1/hr)	Measured Glutamin conc(mM)	New Glutamin conc. After media addition(mM)	Glutamin consumption(mM)	Glutamin consuption rate(mM/hr)	Run ID
0	128.9	0.3	0.27	0.02	0.01	80	80	7.52	35.7	7.84	21	15.77	20	3.8	700	3.28	2.3	0	2.3	3.28	0	0	258000	258000	0	0	0	0	0	0	0	0	1.46	1.46	0	0	1
0.25	121.3	0.3	0.27	0.03	0.01	80	80	7.52	37.9	8.84	21	15.77	20	3.8	NaN	NaN	NaN	NaN	NaN	NaN	NaN	NaN	NaN	NaN	NaN	NaN	NaN	NaN	NaN	NaN	NaN	NaN	NaN	NaN	NaN	NaN	NaN
0.5	118.5	0.3	0.27	0.03	0.01	80	80	7.5	37.1	8.85	21	15.77	20	3.8	NaN	NaN	NaN	NaN	NaN	NaN	NaN	NaN	NaN	NaN	NaN	NaN	NaN	NaN	NaN	NaN	NaN	NaN	NaN	NaN	NaN	NaN	NaN
0.75	113.6	0.3	0.26	0.03	0.01	80	80	7.48	36.5	9.04	21	15.77	20	3.8	NaN	NaN	NaN	NaN	NaN	NaN	NaN	NaN	NaN	NaN	NaN	NaN	NaN	NaN	NaN	NaN	NaN	NaN	NaN	NaN	NaN	NaN	NaN
1	110.7	0.3	0.27	0.03	0.01	80	80	7.45	37.7	8.75	21	15.77	20	3.8	NaN	NaN	NaN	NaN	NaN	NaN	NaN	NaN	NaN	NaN	NaN	NaN	NaN	NaN	NaN	NaN	NaN	NaN	NaN	NaN	NaN	NaN	NaN
1.25	108.3	0.3	0.27	0.03	0.01	80	80	7.43	37.1	8.51	21	15.77	20	3.8	NaN	NaN	NaN	NaN	NaN	NaN	NaN	NaN	NaN	NaN	NaN	NaN	NaN	NaN	NaN	NaN	NaN	NaN	NaN	NaN	NaN	NaN	NaN
1.5	106.1	0.3	0.27	0.02	0.01	80	80	7.42	36.6	8.29	21	15.77	20	3.8	NaN	NaN	NaN	NaN	NaN	NaN	NaN	NaN	NaN	NaN	NaN	NaN	NaN	NaN	NaN	NaN	NaN	NaN	NaN	NaN	NaN	NaN	NaN
1.75	104.4	0.3	0.3	0	0	80	80	7.4	37.1	0.04	21	15.77	20	3.8	NaN	NaN	NaN	NaN	NaN	NaN	NaN	NaN	NaN	NaN	NaN	NaN	NaN	NaN	NaN	NaN	NaN	NaN	NaN	NaN	NaN	NaN	NaN
2	102.9	0.3	0.3	0	0	80	80	7.39	37.2	0.04	21	15.77	20	3.8	NaN	NaN	NaN	NaN	NaN	NaN	NaN	NaN	NaN	NaN	NaN	NaN	NaN	NaN	NaN	NaN	NaN	NaN	NaN	NaN	NaN	NaN	NaN
2.25	101.2	0.3	0.3	0	0	80	80	7.39	36.9	0.04	21	15.77	20	3.8	NaN	NaN	NaN	NaN	NaN	NaN	NaN	NaN	NaN	NaN	NaN	NaN	NaN	NaN	NaN	NaN	NaN	NaN	NaN	NaN	NaN	NaN	NaN
2.5	99.3	0.3	0.3	0	0	80	80	7.4	36.9	0.04	21	15.77	20	3.8	NaN	NaN	NaN	NaN	NaN	NaN	NaN	NaN	NaN	NaN	NaN	NaN	NaN	NaN	NaN	NaN	NaN	NaN	NaN	NaN	NaN	NaN	NaN
2.75	98.2	0.3	0.3	0	0	80	80	7.41	37.1	0.18	21	15.77	20	3.8	NaN	NaN	NaN	NaN	NaN	NaN	NaN	NaN	NaN	NaN	NaN	NaN	NaN	NaN	NaN	NaN	NaN	NaN	NaN	NaN	NaN	NaN	NaN
3	97.2	0.3	0.3	0	0	80	80	7.42	37.1	0.51	21	15.77	20	3.8	NaN	NaN	NaN	NaN	NaN	NaN	NaN	NaN	NaN	NaN	NaN	NaN	NaN	NaN	NaN	NaN	NaN	NaN	NaN	NaN	NaN	NaN	NaN
3.25	96.4	0.3	0.29	0.01	0	80	80	7.43	37	2.42	21	15.77	20	3.8	NaN	NaN	NaN	NaN	NaN	NaN	NaN	NaN	NaN	NaN	NaN	NaN	NaN	NaN	NaN	NaN	NaN	NaN	NaN	NaN	NaN	NaN	NaN
3.5	95.2	0.3	0.29	0.01	0	80	80	7.44	36.9	3.21	21	15.77	20	3.8	NaN	NaN	NaN	NaN	NaN	NaN	NaN	NaN	NaN	NaN	NaN	NaN	NaN	NaN	NaN	NaN	NaN	NaN	NaN	NaN	NaN	NaN	NaN
3.75	95.2	0.3	0.28	0.01	0	80	80	7.44	37	3.76	21	15.77	20	3.8	NaN	NaN	NaN	NaN	NaN	NaN	NaN	NaN	NaN	NaN	NaN	NaN	NaN	NaN	NaN	NaN	NaN	NaN	NaN	NaN	NaN	NaN	NaN
4	94.9	0.3	0.28	0.01	0	80	80	7.45	37	4.49	21	15.77	20	3.8	NaN	NaN	NaN	NaN	NaN	NaN	NaN	NaN	NaN	NaN	NaN	NaN	NaN	NaN	NaN	NaN	NaN	NaN	NaN	NaN	NaN	NaN	NaN
4.25	94.6	0.3	0.28	0.01	0	80	80	7.44	37	5	21	15.77	20	3.8	NaN	NaN	NaN	NaN	NaN	NaN	NaN	NaN	NaN	NaN	NaN	NaN	NaN	NaN	NaN	NaN	NaN	NaN	NaN	NaN	NaN	NaN	NaN
4.5	93.6	0.31	0.29	0.02	0	80	80	7.44	37	5.62	21	15.77	20	3.8	NaN	NaN	NaN	NaN	NaN	NaN	NaN	NaN	NaN	NaN	NaN	NaN	NaN	NaN	NaN	NaN	NaN	NaN	NaN	NaN	NaN	NaN	NaN
4.75	93.2	0.3	0.28	0.02	0	80	80	7.43	37	5.94	21	15.77	20	3.8	NaN	NaN	NaN	NaN	NaN	NaN	NaN	NaN	NaN	NaN	NaN	NaN	NaN	NaN	NaN	NaN	NaN	NaN	NaN	NaN	NaN	NaN	NaN
5	93	0.3	0.28	0.02	0	80	80	7.42	37	6.2	21	15.77	20	3.8	NaN	NaN	NaN	NaN	NaN	NaN	NaN	NaN	NaN	NaN	NaN	NaN	NaN	NaN	NaN	NaN	NaN	NaN	NaN	NaN	NaN	NaN	NaN
5.25	92.7	0.3	0.27	0.02	0.01	80	80	7.42	37	6.62	21	15.77	20	3.8	NaN	NaN	NaN	NaN	NaN	NaN	NaN	NaN	NaN	NaN	NaN	NaN	NaN	NaN	NaN	NaN	NaN	NaN	NaN	NaN	NaN	NaN	NaN
5.5	92.8	0.3	0.27	0.02	0.01	80	80	7.41	37	6.76	21	15.77	20	3.8	NaN	NaN	NaN	NaN	NaN	NaN	NaN	NaN	NaN	NaN	NaN	NaN	NaN	NaN	NaN	NaN	NaN	NaN	NaN	NaN	NaN	NaN	NaN
5.75	93.8	0.3	0.27	0.02	0.01	80	80	7.4	37	6.9	21	15.77	20	3.8	NaN	NaN	NaN	NaN	NaN	NaN	NaN	NaN	NaN	NaN	NaN	NaN	NaN	NaN	NaN	NaN	NaN	NaN	NaN	NaN	NaN	NaN	NaN
6	93.2	0.3	0.27	0.02	0.01	80	80	7.4	37	6.96	21	15.77	20	3.8	NaN	NaN	NaN	NaN	NaN	NaN	NaN	NaN	NaN	NaN	NaN	NaN	NaN	NaN	NaN	NaN	NaN	NaN	NaN	NaN	NaN	NaN	NaN
6.25	94.2	0.3	0.27	0.02	0.01	80	80	7.38	37	6.92	21	15.77	20	3.8	NaN	NaN	NaN	NaN	NaN	NaN	NaN	NaN	NaN	NaN	NaN	NaN	NaN	NaN	NaN	NaN	NaN	NaN	NaN	NaN	NaN	NaN	NaN
6.5	92.6	0.3	0.27	0.02	0.01	80	80	7.37	37	6.83	21	15.77	20	3.8	NaN	NaN	NaN	NaN	NaN	NaN	NaN	NaN	NaN	NaN	NaN	NaN	NaN	NaN	NaN	NaN	NaN	NaN	NaN	NaN	NaN	NaN	NaN
6.75	92.3	0.3	0.27	0.02	0.01	80	80	7.36	37	6.67	21	15.77	20	3.8	NaN	NaN	NaN	NaN	NaN	NaN	NaN	NaN	NaN	NaN	NaN	NaN	NaN	NaN	NaN	NaN	NaN	NaN	NaN	NaN	NaN	NaN	NaN
7	91.5	0.3	0.27	0.02	0.01	80	80	7.35	37	6.46	21	15.77	20	3.8	NaN	NaN	NaN	NaN	NaN	NaN	NaN	NaN	NaN	NaN	NaN	NaN	NaN	NaN	NaN	NaN	NaN	NaN	NaN	NaN	NaN	NaN	NaN
7.25	90.8	0.3	0.3	0	0	80	80	7.34	37	0.04	21	15.77	20	3.8	NaN	NaN	NaN	NaN	NaN	NaN	NaN	NaN	NaN	NaN	NaN	NaN	NaN	NaN	NaN	NaN	NaN	NaN	NaN	NaN	NaN	NaN	NaN
7.5	90.3	0.3	0.3	0	0	80	80	7.35	37	0.04	21	15.77	20	3.8	NaN	NaN	NaN	NaN	NaN	NaN	NaN	NaN	NaN	NaN	NaN	NaN	NaN	NaN	NaN	NaN	NaN	NaN	NaN	NaN	NaN	NaN	NaN
7.75	90	0.3	0.3	0	0	80	80	7.35	37	0.08	21	15.77	20	3.8	NaN	NaN	NaN	NaN	NaN	NaN	NaN	NaN	NaN	NaN	NaN	NaN	NaN	NaN	NaN	NaN	NaN	NaN	NaN	NaN	NaN	NaN	NaN
8	89.5	0.3	0.3	0	0	80	80	7.36	37	0.38	21	15.77	20	3.8	NaN	NaN	NaN	NaN	NaN	NaN	NaN	NaN	NaN	NaN	NaN	NaN	NaN	NaN	NaN	NaN	NaN	NaN	NaN	NaN	NaN	NaN	NaN
8.25	89.1	0.3	0.3	0	0	80	80	7.38	37	0.83	21	15.77	20	3.8	NaN	NaN	NaN	NaN	NaN	NaN	NaN	NaN	NaN	NaN	NaN	NaN	NaN	NaN	NaN	NaN	NaN	NaN	NaN	NaN	NaN	NaN	NaN
8.5	88.5	0.3	0.29	0	0	80	80	7.39	37	1.33	21	15.77	20	3.8	NaN	NaN	NaN	NaN	NaN	NaN	NaN	NaN	NaN	NaN	NaN	NaN	NaN	NaN	NaN	NaN	NaN	NaN	NaN	NaN	NaN	NaN	NaN
8.75	88.9	0.3	0.29	0.01	0	80	80	7.4	37	1.93	21	15.77	20	3.8	NaN	NaN	NaN	NaN	NaN	NaN	NaN	NaN	NaN	NaN	NaN	NaN	NaN	NaN	NaN	NaN	NaN	NaN	NaN	NaN	NaN	NaN	NaN
9	89.2	0.3	0.29	0.01	0	80	80	7.41	37	2.62	21	15.77	20	3.8	NaN	NaN	NaN	NaN	NaN	NaN	NaN	NaN	NaN	NaN	NaN	NaN	NaN	NaN	NaN	NaN	NaN	NaN	NaN	NaN	NaN	NaN	NaN
9.25	88.2	0.3	0.29	0.01	0	80	80	7.42	37	3.15	21	15.77	20	3.8	NaN	NaN	NaN	NaN	NaN	NaN	NaN	NaN	NaN	NaN	NaN	NaN	NaN	NaN	NaN	NaN	NaN	NaN	NaN	NaN	NaN	NaN	NaN
9.5	87	0.3	0.29	0.01	0	80	80	7.42	37	3.62	21	15.77	20	3.8	NaN	NaN	NaN	NaN	NaN	NaN	NaN	NaN	NaN	NaN	NaN	NaN	NaN	NaN	NaN	NaN	NaN	NaN	NaN	NaN	NaN	NaN	NaN
9.75	86	0.3	0.28	0.01	0	80	80	7.43	37	4.19	21	15.77	20	3.8	NaN	NaN	NaN	NaN	NaN	NaN	NaN	NaN	NaN	NaN	NaN	NaN	NaN	NaN	NaN	NaN	NaN	NaN	NaN	NaN	NaN	NaN	NaN
10	84.9	0.3	0.28	0.01	0	80	80	7.42	37	4.51	21	15.77	20	3.8	NaN	NaN	NaN	NaN	NaN	NaN	NaN	NaN	NaN	NaN	NaN	NaN	NaN	NaN	NaN	NaN	NaN	NaN	NaN	NaN	NaN	NaN	NaN
10.25	86.1	0.3	0.28	0.01	0	80	80	7.42	37	5	21	15.77	20	3.8	NaN	NaN	NaN	NaN	NaN	NaN	NaN	NaN	NaN	NaN	NaN	NaN	NaN	NaN	NaN	NaN	NaN	NaN	NaN	NaN	NaN	NaN	NaN
10.5	85.4	0.3	0.28	0.02	0	80	80	7.42	37	5.29	21	15.77	20	3.8	NaN	NaN	NaN	NaN	NaN	NaN	NaN	NaN	NaN	NaN	NaN	NaN	NaN	NaN	NaN	NaN	NaN	NaN	NaN	NaN	NaN	NaN	NaN
10.75	84.4	0.3	0.28	0.02	0	80	80	7.41	37	5.51	21	15.77	20	3.8	NaN	NaN	NaN	NaN	NaN	NaN	NaN	NaN	NaN	NaN	NaN	NaN	NaN	NaN	NaN	NaN	NaN	NaN	NaN	NaN	NaN	NaN	NaN
11	83.9	0.3	0.28	0.02	0	80	80	7.4	37	5.64	21	15.77	20	3.8	NaN	NaN	NaN	NaN	NaN	NaN	NaN	NaN	NaN	NaN	NaN	NaN	NaN	NaN	NaN	NaN	NaN	NaN	NaN	NaN	NaN	NaN	NaN
11.25	83.2	0.3	0.28	0.02	0	80	80	7.39	37	5.64	21	15.77	20	3.8	NaN	NaN	NaN	NaN	NaN	NaN	NaN	NaN	NaN	NaN	NaN	NaN	NaN	NaN	NaN	NaN	NaN	NaN	NaN	NaN	NaN	NaN	NaN
11.5	83.6	0.3	0.28	0.02	0	80	80	7.38	37	5.75	21	15.77	20	3.8	NaN	NaN	NaN	NaN	NaN	NaN	NaN	NaN	NaN	NaN	NaN	NaN	NaN	NaN	NaN	NaN	NaN	NaN	NaN	NaN	NaN	NaN	NaN
11.75	83.6	0.3	0.28	0.02	0	80	80	7.38	37	5.8	21	15.77	20	3.8	NaN	NaN	NaN	NaN	NaN	NaN	NaN	NaN	NaN	NaN	NaN	NaN	NaN	NaN	NaN	NaN	NaN	NaN	NaN	NaN	NaN	NaN	NaN
12	86.3	0.3	0.28	0.02	0	80	80	7.37	37	5.82	21	15.77	20	3.8	NaN	NaN	NaN	NaN	NaN	NaN	NaN	NaN	NaN	NaN	NaN	NaN	NaN	NaN	NaN	NaN	NaN	NaN	NaN	NaN	NaN	NaN	NaN
12.25	86	0.3	0.28	0.02	0	80	80	7.37	37	5.72	21	15.77	20	3.8	NaN	NaN	NaN	NaN	NaN	NaN	NaN	NaN	NaN	NaN	NaN	NaN	NaN	NaN	NaN	NaN	NaN	NaN	NaN	NaN	NaN	NaN	NaN
12.5	85.7	0.3	0.28	0.02	0	80	80	7.35	37	5.53	21	15.77	20	3.8	NaN	NaN	NaN	NaN	NaN	NaN	NaN	NaN	NaN	NaN	NaN	NaN	NaN	NaN	NaN	NaN	NaN	NaN	NaN	NaN	NaN	NaN	NaN
12.75	84.9	0.3	0.3	0	0	80	80	7.34	37	0.04	21	15.77	20	3.8	NaN	NaN	NaN	NaN	NaN	NaN	NaN	NaN	NaN	NaN	NaN	NaN	NaN	NaN	NaN	NaN	NaN	NaN	NaN	NaN	NaN	NaN	NaN
13	84.1	0.3	0.3	0	0	80	80	7.35	37	0.04	21	15.77	20	3.8	NaN	NaN	NaN	NaN	NaN	NaN	NaN	NaN	NaN	NaN	NaN	NaN	NaN	NaN	NaN	NaN	NaN	NaN	NaN	NaN	NaN	NaN	NaN
13.25	83.7	0.3	0.3	0	0	80	80	7.35	37	0.06	21	15.77	20	3.8	NaN	NaN	NaN	NaN	NaN	NaN	NaN	NaN	NaN	NaN	NaN	NaN	NaN	NaN	NaN	NaN	NaN	NaN	NaN	NaN	NaN	NaN	NaN
13.5	83.1	0.3	0.3	0	0	80	80	7.36	37	0.31	21	15.77	20	3.8	NaN	NaN	NaN	NaN	NaN	NaN	NaN	NaN	NaN	NaN	NaN	NaN	NaN	NaN	NaN	NaN	NaN	NaN	NaN	NaN	NaN	NaN	NaN
13.75	82.9	0.3	0.3	0	0	80	80	7.37	37	0.69	21	15.77	20	3.8	NaN	NaN	NaN	NaN	NaN	NaN	NaN	NaN	NaN	NaN	NaN	NaN	NaN	NaN	NaN	NaN	NaN	NaN	NaN	NaN	NaN	NaN	NaN
14	82.5	0.3	0.29	0	0	80	80	7.38	37	1.15	21	15.77	20	3.8	NaN	NaN	NaN	NaN	NaN	NaN	NaN	NaN	NaN	NaN	NaN	NaN	NaN	NaN	NaN	NaN	NaN	NaN	NaN	NaN	NaN	NaN	NaN
14.25	82.4	0.3	0.29	0.01	0	80	80	7.4	37	1.71	21	15.77	20	3.8	NaN	NaN	NaN	NaN	NaN	NaN	NaN	NaN	NaN	NaN	NaN	NaN	NaN	NaN	NaN	NaN	NaN	NaN	NaN	NaN	NaN	NaN	NaN
14.5	81.5	0.3	0.29	0.01	0	80	80	7.41	37	2.29	21	15.77	20	3.8	NaN	NaN	NaN	NaN	NaN	NaN	NaN	NaN	NaN	NaN	NaN	NaN	NaN	NaN	NaN	NaN	NaN	NaN	NaN	NaN	NaN	NaN	NaN
14.75	80.4	0.3	0.29	0.01	0	80	80	7.4	37	2.53	21	15.77	20	3.8	NaN	NaN	NaN	NaN	NaN	NaN	NaN	NaN	NaN	NaN	NaN	NaN	NaN	NaN	NaN	NaN	NaN	NaN	NaN	NaN	NaN	NaN	NaN
15	81	0.3	0.29	0.01	0	80	80	7.41	37	3.06	21	15.77	20	3.8	NaN	NaN	NaN	NaN	NaN	NaN	NaN	NaN	NaN	NaN	NaN	NaN	NaN	NaN	NaN	NaN	NaN	NaN	NaN	NaN	NaN	NaN	NaN
15.25	81.1	0.3	0.29	0.01	0	80	80	7.41	37	3.58	21	15.77	20	3.8	NaN	NaN	NaN	NaN	NaN	NaN	NaN	NaN	NaN	NaN	NaN	NaN	NaN	NaN	NaN	NaN	NaN	NaN	NaN	NaN	NaN	NaN	NaN
15.5	81	0.3	0.28	0.01	0	80	80	7.42	37	4	21	15.77	20	3.8	NaN	NaN	NaN	NaN	NaN	NaN	NaN	NaN	NaN	NaN	NaN	NaN	NaN	NaN	NaN	NaN	NaN	NaN	NaN	NaN	NaN	NaN	NaN
15.75	80.3	0.3	0.28	0.01	0	80	80	7.41	37	4.22	21	15.77	20	3.8	NaN	NaN	NaN	NaN	NaN	NaN	NaN	NaN	NaN	NaN	NaN	NaN	NaN	NaN	NaN	NaN	NaN	NaN	NaN	NaN	NaN	NaN	NaN
16	81.1	0.3	0.28	0.01	0	80	80	7.41	37	4.65	21	15.77	20	3.8	NaN	NaN	NaN	NaN	NaN	NaN	NaN	NaN	NaN	NaN	NaN	NaN	NaN	NaN	NaN	NaN	NaN	NaN	NaN	NaN	NaN	NaN	NaN
16.25	80.9	0.3	0.28	0.01	0	80	80	7.4	37	4.83	21	15.77	20	3.8	NaN	NaN	NaN	NaN	NaN	NaN	NaN	NaN	NaN	NaN	NaN	NaN	NaN	NaN	NaN	NaN	NaN	NaN	NaN	NaN	NaN	NaN	NaN
16.5	83.4	0.3	0.28	0.02	0	80	80	7.4	37	5.14	21	15.77	20	3.8	NaN	NaN	NaN	NaN	NaN	NaN	NaN	NaN	NaN	NaN	NaN	NaN	NaN	NaN	NaN	NaN	NaN	NaN	NaN	NaN	NaN	NaN	NaN
16.75	82.4	0.3	0.28	0.02	0	80	80	7.4	37	5.26	21	15.77	20	3.8	NaN	NaN	NaN	NaN	NaN	NaN	NaN	NaN	NaN	NaN	NaN	NaN	NaN	NaN	NaN	NaN	NaN	NaN	NaN	NaN	NaN	NaN	NaN
17	81.7	0.3	0.28	0.02	0	80	80	7.39	37	5.34	21	15.77	20	3.8	NaN	NaN	NaN	NaN	NaN	NaN	NaN	NaN	NaN	NaN	NaN	NaN	NaN	NaN	NaN	NaN	NaN	NaN	NaN	NaN	NaN	NaN	NaN
17.25	81	0.3	0.28	0.02	0	80	80	7.38	37	5.32	21	15.77	20	3.8	NaN	NaN	NaN	NaN	NaN	NaN	NaN	NaN	NaN	NaN	NaN	NaN	NaN	NaN	NaN	NaN	NaN	NaN	NaN	NaN	NaN	NaN	NaN
17.5	79.6	0.3	0.28	0.02	0	80	80	7.37	37	5.19	21	15.77	20	3.8	NaN	NaN	NaN	NaN	NaN	NaN	NaN	NaN	NaN	NaN	NaN	NaN	NaN	NaN	NaN	NaN	NaN	NaN	NaN	NaN	NaN	NaN	NaN
17.75	78.6	0.3	0.28	0.01	0	80	80	7.36	37	4.9	21	15.77	20	3.8	NaN	NaN	NaN	NaN	NaN	NaN	NaN	NaN	NaN	NaN	NaN	NaN	NaN	NaN	NaN	NaN	NaN	NaN	NaN	NaN	NaN	NaN	NaN
18	77.7	0.3	0.3	0.01	0	80	80	7.35	37	4.91	21	15.77	20	3.8	NaN	NaN	NaN	NaN	NaN	NaN	NaN	NaN	NaN	NaN	NaN	NaN	NaN	NaN	NaN	NaN	NaN	NaN	NaN	NaN	NaN	NaN	NaN
18.25	77.6	0.3	0.3	0	0	80	80	7.34	37	0.04	21	15.77	20	3.8	NaN	NaN	NaN	NaN	NaN	NaN	NaN	NaN	NaN	NaN	NaN	NaN	NaN	NaN	NaN	NaN	NaN	NaN	NaN	NaN	NaN	NaN	NaN
18.5	77.3	0.3	0.3	0	0	80	80	7.35	37	0.04	21	15.77	20	3.8	NaN	NaN	NaN	NaN	NaN	NaN	NaN	NaN	NaN	NaN	NaN	NaN	NaN	NaN	NaN	NaN	NaN	NaN	NaN	NaN	NaN	NaN	NaN
18.75	77.3	0.3	0.3	0	0	80	80	7.35	37	0.09	21	15.77	20	3.8	NaN	NaN	NaN	NaN	NaN	NaN	NaN	NaN	NaN	NaN	NaN	NaN	NaN	NaN	NaN	NaN	NaN	NaN	NaN	NaN	NaN	NaN	NaN
19	77	0.3	0.3	0	0	80	80	7.36	37	0.27	21	15.77	20	3.8	NaN	NaN	NaN	NaN	NaN	NaN	NaN	NaN	NaN	NaN	NaN	NaN	NaN	NaN	NaN	NaN	NaN	NaN	NaN	NaN	NaN	NaN	NaN
19.25	75.6	0.3	0.3	0	0	80	80	7.37	37	0.54	21	15.77	20	3.8	NaN	NaN	NaN	NaN	NaN	NaN	NaN	NaN	NaN	NaN	NaN	NaN	NaN	NaN	NaN	NaN	NaN	NaN	NaN	NaN	NaN	NaN	NaN
19.5	75	0.3	0.3	0	0	80	80	7.38	37	0.93	21	15.77	20	3.8	NaN	NaN	NaN	NaN	NaN	NaN	NaN	NaN	NaN	NaN	NaN	NaN	NaN	NaN	NaN	NaN	NaN	NaN	NaN	NaN	NaN	NaN	NaN
19.75	74.5	0.3	0.29	0	0	80	80	7.39	37	1.37	21	15.77	20	3.8	NaN	NaN	NaN	NaN	NaN	NaN	NaN	NaN	NaN	NaN	NaN	NaN	NaN	NaN	NaN	NaN	NaN	NaN	NaN	NaN	NaN	NaN	NaN
20	74.3	0.3	0.29	0.01	0	80	80	7.4	37	1.92	21	15.77	20	3.8	NaN	NaN	NaN	NaN	NaN	NaN	NaN	NaN	NaN	NaN	NaN	NaN	NaN	NaN	NaN	NaN	NaN	NaN	NaN	NaN	NaN	NaN	NaN
20.25	74.7	0.3	0.29	0.01	0	80	80	7.41	37	2.52	21	15.77	20	3.8	NaN	NaN	NaN	NaN	NaN	NaN	NaN	NaN	NaN	NaN	NaN	NaN	NaN	NaN	NaN	NaN	NaN	NaN	NaN	NaN	NaN	NaN	NaN
20.5	75.1	0.3	0.29	0.01	0	80	80	7.41	37	2.8	21	15.77	20	3.8	NaN	NaN	NaN	NaN	NaN	NaN	NaN	NaN	NaN	NaN	NaN	NaN	NaN	NaN	NaN	NaN	NaN	NaN	NaN	NaN	NaN	NaN	NaN
20.75	76.2	0.3	0.29	0.01	0	80	80	7.41	37	3.27	21	15.77	20	3.8	NaN	NaN	NaN	NaN	NaN	NaN	NaN	NaN	NaN	NaN	NaN	NaN	NaN	NaN	NaN	NaN	NaN	NaN	NaN	NaN	NaN	NaN	NaN
21	76.3	0.3	0.29	0.01	0	80	80	7.42	37	3.79	21	15.77	20	3.8	690	3.04	2.0976	0	2.0976	3.04	0.23933	0.0113967	NaN	337500	7.09127e-07	0.23933	1430	0.57	6.384	0.387516	54.2227	0.0127908	NaN	NaN	NaN	NaN	NaN
21.25	76.3	0.3	0.29	0.01	0	80	80	7.41	37	3.91	21	15.77	20	3.8	NaN	NaN	NaN	NaN	NaN	NaN	NaN	NaN	NaN	NaN	NaN	NaN	NaN	NaN	NaN	NaN	NaN	NaN	NaN	NaN	NaN	NaN	NaN
21.5	76.5	0.3	0.28	0.01	0	80	80	7.41	37	4.31	21	15.77	20	3.8	NaN	NaN	NaN	NaN	NaN	NaN	NaN	NaN	NaN	NaN	NaN	NaN	NaN	NaN	NaN	NaN	NaN	NaN	NaN	NaN	NaN	NaN	NaN
21.75	77.5	0.3	0.28	0.01	0	80	80	7.4	37	4.34	21	15.77	20	3.8	NaN	NaN	NaN	NaN	NaN	NaN	NaN	NaN	NaN	NaN	NaN	NaN	NaN	NaN	NaN	NaN	NaN	NaN	NaN	NaN	NaN	NaN	NaN
22	77.5	0.3	0.28	0.01	0	80	80	7.4	37	4.65	21	15.77	20	3.8	NaN	NaN	NaN	NaN	NaN	NaN	NaN	NaN	NaN	NaN	NaN	NaN	NaN	NaN	NaN	NaN	NaN	NaN	NaN	NaN	NaN	NaN	NaN
22.25	77.2	0.3	0.28	0.01	0	80	80	7.38	37	4.56	21	15.77	20	3.8	NaN	NaN	NaN	NaN	NaN	NaN	NaN	NaN	NaN	NaN	NaN	NaN	NaN	NaN	NaN	NaN	NaN	NaN	NaN	NaN	NaN	NaN	NaN
22.5	76.6	0.29	0.28	0.01	0	80	80	7.38	37	4.58	21	15.77	20	3.8	NaN	NaN	NaN	NaN	NaN	NaN	NaN	NaN	NaN	NaN	NaN	NaN	NaN	NaN	NaN	NaN	NaN	NaN	NaN	NaN	NaN	NaN	NaN
22.75	77.3	0.3	0.28	0.01	0	80	80	7.37	37	4.57	21	15.77	20	3.8	NaN	NaN	NaN	NaN	NaN	NaN	NaN	NaN	NaN	NaN	NaN	NaN	NaN	NaN	NaN	NaN	NaN	NaN	NaN	NaN	NaN	NaN	NaN
23	76.9	0.3	0.28	0.01	0	80	80	7.36	37	4.42	21	15.77	20	3.8	NaN	NaN	NaN	NaN	NaN	NaN	NaN	NaN	NaN	NaN	NaN	NaN	NaN	NaN	NaN	NaN	NaN	NaN	NaN	NaN	NaN	NaN	NaN
23.25	77.6	0.3	0.28	0.01	0	80	80	7.36	37	4.46	21	15.77	20	3.8	NaN	NaN	NaN	NaN	NaN	NaN	NaN	NaN	NaN	NaN	NaN	NaN	NaN	NaN	NaN	NaN	NaN	NaN	NaN	NaN	NaN	NaN	NaN
23.5	77.8	0.3	0.28	0.01	0	80	80	7.35	37	4.33	21	15.77	20	3.8	NaN	NaN	NaN	NaN	NaN	NaN	NaN	NaN	NaN	NaN	NaN	NaN	NaN	NaN	NaN	NaN	NaN	NaN	NaN	NaN	NaN	NaN	NaN
23.75	77.5	0.3	0.3	0	0	80	80	7.35	37	0.04	21	15.77	20	3.8	NaN	NaN	NaN	NaN	NaN	NaN	NaN	NaN	NaN	NaN	NaN	NaN	NaN	NaN	NaN	NaN	NaN	NaN	NaN	NaN	NaN	NaN	NaN
24	77.2	0.3	0.3	0	0	80	80	7.35	37	0.04	21	15.77	20	3.8	NaN	NaN	NaN	NaN	NaN	NaN	NaN	NaN	NaN	NaN	NaN	NaN	NaN	NaN	NaN	NaN	NaN	NaN	NaN	NaN	NaN	NaN	NaN
24.25	77.5	0.3	0.3	0	0	80	80	7.36	37	0.14	21	15.77	20	3.8	NaN	NaN	NaN	NaN	NaN	NaN	NaN	NaN	NaN	NaN	NaN	NaN	NaN	NaN	NaN	NaN	NaN	NaN	NaN	NaN	NaN	NaN	NaN
24.5	76.8	0.3	0.3	0	0	70	70	7.36	37	0.37	21	15.77	20	3.8	NaN	NaN	NaN	NaN	NaN	NaN	NaN	NaN	NaN	NaN	NaN	NaN	NaN	NaN	NaN	NaN	NaN	NaN	NaN	NaN	NaN	NaN	NaN
24.75	75.4	0.3	0.3	0	0	70	70	7.37	37	0.64	21	15.77	20	3.8	NaN	NaN	NaN	NaN	NaN	NaN	NaN	NaN	NaN	NaN	NaN	NaN	NaN	NaN	NaN	NaN	NaN	NaN	NaN	NaN	NaN	NaN	NaN
25	73.7	0.3	0.3	0	0	70	70	7.37	37	0.89	21	15.77	20	3.8	NaN	NaN	NaN	NaN	NaN	NaN	NaN	NaN	NaN	NaN	NaN	NaN	NaN	NaN	NaN	NaN	NaN	NaN	NaN	NaN	NaN	NaN	NaN
25.25	72	0.3	0.29	0	0	70	70	7.38	37	1.24	21	15.77	20	3.8	NaN	NaN	NaN	NaN	NaN	NaN	NaN	NaN	NaN	NaN	NaN	NaN	NaN	NaN	NaN	NaN	NaN	NaN	NaN	NaN	NaN	NaN	NaN
25.5	70.9	0.3	0.29	0	0	70	70	7.38	37	1.38	21	15.77	20	3.8	NaN	NaN	NaN	NaN	NaN	NaN	NaN	NaN	NaN	NaN	NaN	NaN	NaN	NaN	NaN	NaN	NaN	NaN	NaN	NaN	NaN	NaN	NaN
25.75	70.3	0.3	0.29	0.01	0	70	70	7.38	37	1.69	21	15.77	20	3.8	NaN	NaN	NaN	NaN	NaN	NaN	NaN	NaN	NaN	NaN	NaN	NaN	NaN	NaN	NaN	NaN	NaN	NaN	NaN	NaN	NaN	NaN	NaN
26	70	0.29	0.28	0.01	0	70	70	7.39	37	2.1	21	15.77	20	3.8	NaN	NaN	NaN	NaN	NaN	NaN	NaN	NaN	NaN	NaN	NaN	NaN	NaN	NaN	NaN	NaN	NaN	NaN	NaN	NaN	NaN	NaN	NaN
26.25	69.6	0.3	0.29	0.01	0	70	70	7.39	37	2.21	21	15.77	20	3.8	NaN	NaN	NaN	NaN	NaN	NaN	NaN	NaN	NaN	NaN	NaN	NaN	NaN	NaN	NaN	NaN	NaN	NaN	NaN	NaN	NaN	NaN	NaN
26.5	69	0.3	0.29	0.01	0	70	70	7.39	37	2.46	21	15.77	20	3.8	NaN	NaN	NaN	NaN	NaN	NaN	NaN	NaN	NaN	NaN	NaN	NaN	NaN	NaN	NaN	NaN	NaN	NaN	NaN	NaN	NaN	NaN	NaN
26.75	68.8	0.3	0.29	0.01	0	70	70	7.39	37	2.83	21	15.77	20	3.8	NaN	NaN	NaN	NaN	NaN	NaN	NaN	NaN	NaN	NaN	NaN	NaN	NaN	NaN	NaN	NaN	NaN	NaN	NaN	NaN	NaN	NaN	NaN
27	69.7	0.3	0.29	0.01	0	70	70	7.38	37	2.74	21	15.77	20	3.8	NaN	NaN	NaN	NaN	NaN	NaN	NaN	NaN	NaN	NaN	NaN	NaN	NaN	NaN	NaN	NaN	NaN	NaN	NaN	NaN	NaN	NaN	NaN
27.25	70.1	0.3	0.29	0.01	0	70	70	7.38	37	2.95	21	15.77	20	3.8	NaN	NaN	NaN	NaN	NaN	NaN	NaN	NaN	NaN	NaN	NaN	NaN	NaN	NaN	NaN	NaN	NaN	NaN	NaN	NaN	NaN	NaN	NaN
27.5	70.2	0.3	0.29	0.01	0	70	70	7.38	37	3.1	21	15.77	20	3.8	NaN	NaN	NaN	NaN	NaN	NaN	NaN	NaN	NaN	NaN	NaN	NaN	NaN	NaN	NaN	NaN	NaN	NaN	NaN	NaN	NaN	NaN	NaN
27.75	70.8	0.3	0.29	0.01	0	70	70	7.37	37	3.05	21	15.77	20	3.8	NaN	NaN	NaN	NaN	NaN	NaN	NaN	NaN	NaN	NaN	NaN	NaN	NaN	NaN	NaN	NaN	NaN	NaN	NaN	NaN	NaN	NaN	NaN
28	70.8	0.3	0.29	0.01	0	70	70	7.37	37	3.22	21	15.77	20	3.8	NaN	NaN	NaN	NaN	NaN	NaN	NaN	NaN	NaN	NaN	NaN	NaN	NaN	NaN	NaN	NaN	NaN	NaN	NaN	NaN	NaN	NaN	NaN
28.25	69.7	0.3	0.29	0.01	0	70	70	7.36	37	3.04	21	15.77	20	3.8	NaN	NaN	NaN	NaN	NaN	NaN	NaN	NaN	NaN	NaN	NaN	NaN	NaN	NaN	NaN	NaN	NaN	NaN	NaN	NaN	NaN	NaN	NaN
28.5	69.4	0.3	0.29	0.01	0	70	70	7.36	37	3.05	21	15.77	20	3.8	NaN	NaN	NaN	NaN	NaN	NaN	NaN	NaN	NaN	NaN	NaN	NaN	NaN	NaN	NaN	NaN	NaN	NaN	NaN	NaN	NaN	NaN	NaN
28.75	68.9	0.3	0.29	0.01	0	70	70	7.36	37	3.07	21	15.77	20	3.8	NaN	NaN	NaN	NaN	NaN	NaN	NaN	NaN	NaN	NaN	NaN	NaN	NaN	NaN	NaN	NaN	NaN	NaN	NaN	NaN	NaN	NaN	NaN
29	67.8	0.3	0.3	0	0	70	70	7.35	37	0.04	21	15.77	20	3.8	NaN	NaN	NaN	NaN	NaN	NaN	NaN	NaN	NaN	NaN	NaN	NaN	NaN	NaN	NaN	NaN	NaN	NaN	NaN	NaN	NaN	NaN	NaN
29.25	66.9	0.3	0.3	0	0	70	70	7.35	37	0.04	21	15.77	20	3.8	NaN	NaN	NaN	NaN	NaN	NaN	NaN	NaN	NaN	NaN	NaN	NaN	NaN	NaN	NaN	NaN	NaN	NaN	NaN	NaN	NaN	NaN	NaN
29.5	66.4	0.3	0.3	0	0	70	70	7.35	37	0.06	21	15.77	20	3.8	NaN	NaN	NaN	NaN	NaN	NaN	NaN	NaN	NaN	NaN	NaN	NaN	NaN	NaN	NaN	NaN	NaN	NaN	NaN	NaN	NaN	NaN	NaN
29.75	66.6	0.3	0.3	0	0	70	70	7.36	37	0.2	21	15.77	20	3.8	NaN	NaN	NaN	NaN	NaN	NaN	NaN	NaN	NaN	NaN	NaN	NaN	NaN	NaN	NaN	NaN	NaN	NaN	NaN	NaN	NaN	NaN	NaN
30	66.6	0.3	0.3	0	0	70	70	7.36	37	0.38	21	15.77	20	3.8	NaN	NaN	NaN	NaN	NaN	NaN	NaN	NaN	NaN	NaN	NaN	NaN	NaN	NaN	NaN	NaN	NaN	NaN	NaN	NaN	NaN	NaN	NaN
30.25	66.7	0.3	0.3	0	0	70	70	7.37	37	0.67	21	15.77	20	3.8	NaN	NaN	NaN	NaN	NaN	NaN	NaN	NaN	NaN	NaN	NaN	NaN	NaN	NaN	NaN	NaN	NaN	NaN	NaN	NaN	NaN	NaN	NaN
30.5	67.3	0.3	0.3	0	0	70	70	7.38	37	0.98	21	15.77	20	3.8	NaN	NaN	NaN	NaN	NaN	NaN	NaN	NaN	NaN	NaN	NaN	NaN	NaN	NaN	NaN	NaN	NaN	NaN	NaN	NaN	NaN	NaN	NaN
30.75	67.8	0.3	0.29	0	0	70	70	7.38	37	1.35	21	15.77	20	3.8	NaN	NaN	NaN	NaN	NaN	NaN	NaN	NaN	NaN	NaN	NaN	NaN	NaN	NaN	NaN	NaN	NaN	NaN	NaN	NaN	NaN	NaN	NaN
31	67	0.3	0.3	0.01	0	70	70	7.39	37	1.71	21	15.77	20	3.8	NaN	NaN	NaN	NaN	NaN	NaN	NaN	NaN	NaN	NaN	NaN	NaN	NaN	NaN	NaN	NaN	NaN	NaN	NaN	NaN	NaN	NaN	NaN
31.25	69.6	0.3	0.29	0.01	0	70	70	7.39	37	2.04	21	15.77	20	3.8	NaN	NaN	NaN	NaN	NaN	NaN	NaN	NaN	NaN	NaN	NaN	NaN	NaN	NaN	NaN	NaN	NaN	NaN	NaN	NaN	NaN	NaN	NaN
31.5	69.7	0.3	0.29	0.01	0	70	70	7.39	37	2.31	21	15.77	20	3.8	NaN	NaN	NaN	NaN	NaN	NaN	NaN	NaN	NaN	NaN	NaN	NaN	NaN	NaN	NaN	NaN	NaN	NaN	NaN	NaN	NaN	NaN	NaN
31.75	69.5	0.3	0.29	0.01	0	70	70	7.39	37	2.48	21	15.77	20	3.8	NaN	NaN	NaN	NaN	NaN	NaN	NaN	NaN	NaN	NaN	NaN	NaN	NaN	NaN	NaN	NaN	NaN	NaN	NaN	NaN	NaN	NaN	NaN
32	68.8	0.3	0.29	0.01	0	70	70	7.38	37	2.58	21	15.77	20	3.8	NaN	NaN	NaN	NaN	NaN	NaN	NaN	NaN	NaN	NaN	NaN	NaN	NaN	NaN	NaN	NaN	NaN	NaN	NaN	NaN	NaN	NaN	NaN
32.25	68.2	0.3	0.29	0.01	0	70	70	7.38	37	2.62	21	15.77	20	3.8	NaN	NaN	NaN	NaN	NaN	NaN	NaN	NaN	NaN	NaN	NaN	NaN	NaN	NaN	NaN	NaN	NaN	NaN	NaN	NaN	NaN	NaN	NaN
32.5	67.3	0.3	0.29	0.01	0	70	70	7.37	37	2.52	21	15.77	20	3.8	NaN	NaN	NaN	NaN	NaN	NaN	NaN	NaN	NaN	NaN	NaN	NaN	NaN	NaN	NaN	NaN	NaN	NaN	NaN	NaN	NaN	NaN	NaN
32.75	64.9	0.3	0.29	0.01	0	70	70	7.36	37	2.42	21	15.77	20	3.8	NaN	NaN	NaN	NaN	NaN	NaN	NaN	NaN	NaN	NaN	NaN	NaN	NaN	NaN	NaN	NaN	NaN	NaN	NaN	NaN	NaN	NaN	NaN
33	63.5	0.3	0.29	0.01	0	70	70	7.35	37	2.27	21	15.77	20	3.8	NaN	NaN	NaN	NaN	NaN	NaN	NaN	NaN	NaN	NaN	NaN	NaN	NaN	NaN	NaN	NaN	NaN	NaN	NaN	NaN	NaN	NaN	NaN
33.25	62.7	0.3	0.3	0	0	70	70	7.35	37	0.04	21	15.77	20	3.8	NaN	NaN	NaN	NaN	NaN	NaN	NaN	NaN	NaN	NaN	NaN	NaN	NaN	NaN	NaN	NaN	NaN	NaN	NaN	NaN	NaN	NaN	NaN
33.5	62.5	0.3	0.3	0	0	70	70	7.35	37	0.06	21	15.77	20	3.8	NaN	NaN	NaN	NaN	NaN	NaN	NaN	NaN	NaN	NaN	NaN	NaN	NaN	NaN	NaN	NaN	NaN	NaN	NaN	NaN	NaN	NaN	NaN
33.75	62.1	0.3	0.3	0	0	70	70	7.36	37	0.13	21	15.77	20	3.8	NaN	NaN	NaN	NaN	NaN	NaN	NaN	NaN	NaN	NaN	NaN	NaN	NaN	NaN	NaN	NaN	NaN	NaN	NaN	NaN	NaN	NaN	NaN
34	61.7	0.3	0.3	0	0	70	70	7.36	37	0.26	21	15.77	20	3.8	NaN	NaN	NaN	NaN	NaN	NaN	NaN	NaN	NaN	NaN	NaN	NaN	NaN	NaN	NaN	NaN	NaN	NaN	NaN	NaN	NaN	NaN	NaN
34.25	61.8	0.3	0.3	0	0	70	70	7.36	37	0.4	21	15.77	20	3.8	NaN	NaN	NaN	NaN	NaN	NaN	NaN	NaN	NaN	NaN	NaN	NaN	NaN	NaN	NaN	NaN	NaN	NaN	NaN	NaN	NaN	NaN	NaN
34.5	62	0.3	0.3	0	0	70	70	7.37	37	0.58	21	15.77	20	3.8	NaN	NaN	NaN	NaN	NaN	NaN	NaN	NaN	NaN	NaN	NaN	NaN	NaN	NaN	NaN	NaN	NaN	NaN	NaN	NaN	NaN	NaN	NaN
34.75	61.5	0.3	0.3	0	0	70	70	7.36	37	0.45	21	15.77	20	3.8	NaN	NaN	NaN	NaN	NaN	NaN	NaN	NaN	NaN	NaN	NaN	NaN	NaN	NaN	NaN	NaN	NaN	NaN	NaN	NaN	NaN	NaN	NaN
35	61.4	0.3	0.3	0	0	70	70	7.35	37	0.42	21	15.77	20	3.8	NaN	NaN	NaN	NaN	NaN	NaN	NaN	NaN	NaN	NaN	NaN	NaN	NaN	NaN	NaN	NaN	NaN	NaN	NaN	NaN	NaN	NaN	NaN
35.25	61.1	0.3	0.3	0	0	70	70	7.35	37	0.47	21	15.77	20	3.8	NaN	NaN	NaN	NaN	NaN	NaN	NaN	NaN	NaN	NaN	NaN	NaN	NaN	NaN	NaN	NaN	NaN	NaN	NaN	NaN	NaN	NaN	NaN
35.5	60.1	0.3	0.3	0	0	70	70	7.35	37	0.47	21	15.77	20	3.8	NaN	NaN	NaN	NaN	NaN	NaN	NaN	NaN	NaN	NaN	NaN	NaN	NaN	NaN	NaN	NaN	NaN	NaN	NaN	NaN	NaN	NaN	NaN
35.75	59.9	0.3	0.3	0	0	70	70	7.36	37	0.55	21	15.77	20	3.8	NaN	NaN	NaN	NaN	NaN	NaN	NaN	NaN	NaN	NaN	NaN	NaN	NaN	NaN	NaN	NaN	NaN	NaN	NaN	NaN	NaN	NaN	NaN
36	59.1	0.3	0.3	0	0	70	70	7.36	37	0.64	21	15.77	20	3.8	NaN	NaN	NaN	NaN	NaN	NaN	NaN	NaN	NaN	NaN	NaN	NaN	NaN	NaN	NaN	NaN	NaN	NaN	NaN	NaN	NaN	NaN	NaN
36.25	58.4	0.3	0.3	0	0	70	70	7.36	37	0.73	21	15.77	20	3.8	NaN	NaN	NaN	NaN	NaN	NaN	NaN	NaN	NaN	NaN	NaN	NaN	NaN	NaN	NaN	NaN	NaN	NaN	NaN	NaN	NaN	NaN	NaN
36.5	58.5	0.3	0.3	0	0	70	70	7.36	37	0.85	21	15.77	20	3.8	NaN	NaN	NaN	NaN	NaN	NaN	NaN	NaN	NaN	NaN	NaN	NaN	NaN	NaN	NaN	NaN	NaN	NaN	NaN	NaN	NaN	NaN	NaN
36.75	58.5	0.3	0.3	0	0	70	70	7.36	37	1.01	21	15.77	20	3.8	NaN	NaN	NaN	NaN	NaN	NaN	NaN	NaN	NaN	NaN	NaN	NaN	NaN	NaN	NaN	NaN	NaN	NaN	NaN	NaN	NaN	NaN	NaN
37	57.8	0.3	0.29	0	0	70	70	7.36	37	1.08	21	15.77	20	3.8	NaN	NaN	NaN	NaN	NaN	NaN	NaN	NaN	NaN	NaN	NaN	NaN	NaN	NaN	NaN	NaN	NaN	NaN	NaN	NaN	NaN	NaN	NaN
37.25	59.5	0.3	0.29	0	0	70	70	7.36	37	1.13	21	15.77	20	3.8	NaN	NaN	NaN	NaN	NaN	NaN	NaN	NaN	NaN	NaN	NaN	NaN	NaN	NaN	NaN	NaN	NaN	NaN	NaN	NaN	NaN	NaN	NaN
37.5	59.4	0.3	0.29	0	0	70	70	7.36	37	1.14	21	15.77	20	3.8	NaN	NaN	NaN	NaN	NaN	NaN	NaN	NaN	NaN	NaN	NaN	NaN	NaN	NaN	NaN	NaN	NaN	NaN	NaN	NaN	NaN	NaN	NaN
37.75	58.8	0.3	0.29	0	0	70	70	7.36	37	1.09	21	15.77	20	3.8	NaN	NaN	NaN	NaN	NaN	NaN	NaN	NaN	NaN	NaN	NaN	NaN	NaN	NaN	NaN	NaN	NaN	NaN	NaN	NaN	NaN	NaN	NaN
38	57.8	0.3	0.29	0	0	70	70	7.35	37	1.03	21	15.77	20	3.8	NaN	NaN	NaN	NaN	NaN	NaN	NaN	NaN	NaN	NaN	NaN	NaN	NaN	NaN	NaN	NaN	NaN	NaN	NaN	NaN	NaN	NaN	NaN
38.25	57.1	0.3	0.3	0	0	70	70	7.35	37	0.04	21	15.77	20	3.8	NaN	NaN	NaN	NaN	NaN	NaN	NaN	NaN	NaN	NaN	NaN	NaN	NaN	NaN	NaN	NaN	NaN	NaN	NaN	NaN	NaN	NaN	NaN
38.5	56.3	0.3	0.3	0	0	70	70	7.35	37	0.04	21	15.77	20	3.8	NaN	NaN	NaN	NaN	NaN	NaN	NaN	NaN	NaN	NaN	NaN	NaN	NaN	NaN	NaN	NaN	NaN	NaN	NaN	NaN	NaN	NaN	NaN
38.75	56.3	0.3	0.3	0	0	70	70	7.35	37	0.04	21	15.77	20	3.8	NaN	NaN	NaN	NaN	NaN	NaN	NaN	NaN	NaN	NaN	NaN	NaN	NaN	NaN	NaN	NaN	NaN	NaN	NaN	NaN	NaN	NaN	NaN
39	56.4	0.3	0.3	0	0	70	70	7.35	37	0.04	21	15.77	20	3.8	NaN	NaN	NaN	NaN	NaN	NaN	NaN	NaN	NaN	NaN	NaN	NaN	NaN	NaN	NaN	NaN	NaN	NaN	NaN	NaN	NaN	NaN	NaN
39.25	56.6	0.3	0.3	0	0	70	70	7.35	37	0.04	21	15.77	20	3.8	NaN	NaN	NaN	NaN	NaN	NaN	NaN	NaN	NaN	NaN	NaN	NaN	NaN	NaN	NaN	NaN	NaN	NaN	NaN	NaN	NaN	NaN	NaN
39.5	56.4	0.3	0.3	0	0	70	70	7.35	37	0.04	21	15.77	20	3.8	NaN	NaN	NaN	NaN	NaN	NaN	NaN	NaN	NaN	NaN	NaN	NaN	NaN	NaN	NaN	NaN	NaN	NaN	NaN	NaN	NaN	NaN	NaN
39.75	56.2	0.3	0.3	0	0	70	70	7.35	37	0.04	21	15.77	20	3.8	NaN	NaN	NaN	NaN	NaN	NaN	NaN	NaN	NaN	NaN	NaN	NaN	NaN	NaN	NaN	NaN	NaN	NaN	NaN	NaN	NaN	NaN	NaN
40	56.1	0.3	0.3	0	0	70	70	7.35	37	0.04	21	15.77	20	3.8	NaN	NaN	NaN	NaN	NaN	NaN	NaN	NaN	NaN	NaN	NaN	NaN	NaN	NaN	NaN	NaN	NaN	NaN	NaN	NaN	NaN	NaN	NaN
40.25	56.1	0.3	0.3	0	0	70	70	7.35	37	0.04	21	15.77	20	3.8	NaN	NaN	NaN	NaN	NaN	NaN	NaN	NaN	NaN	NaN	NaN	NaN	NaN	NaN	NaN	NaN	NaN	NaN	NaN	NaN	NaN	NaN	NaN
40.5	55.8	0.3	0.3	0	0	70	70	7.35	37	0.04	21	15.77	20	3.8	NaN	NaN	NaN	NaN	NaN	NaN	NaN	NaN	NaN	NaN	NaN	NaN	NaN	NaN	NaN	NaN	NaN	NaN	NaN	NaN	NaN	NaN	NaN
40.75	55.6	0.3	0.3	0	0	70	70	7.35	37	0.04	21	15.77	20	3.8	NaN	NaN	NaN	NaN	NaN	NaN	NaN	NaN	NaN	NaN	NaN	NaN	NaN	NaN	NaN	NaN	NaN	NaN	NaN	NaN	NaN	NaN	NaN
41	55.9	0.3	0.3	0	0	70	70	7.35	37	0.04	21	15.77	20	3.8	NaN	NaN	NaN	NaN	NaN	NaN	NaN	NaN	NaN	NaN	NaN	NaN	NaN	NaN	NaN	NaN	NaN	NaN	NaN	NaN	NaN	NaN	NaN
41.25	56	0.3	0.3	0	0	70	70	7.35	37	0.04	21	15.77	20	3.8	NaN	NaN	NaN	NaN	NaN	NaN	NaN	NaN	NaN	NaN	NaN	NaN	NaN	NaN	NaN	NaN	NaN	NaN	NaN	NaN	NaN	NaN	NaN
41.5	55.5	0.3	0.3	0	0	70	70	7.34	37	0.04	21	15.77	20	3.8	NaN	NaN	NaN	NaN	NaN	NaN	NaN	NaN	NaN	NaN	NaN	NaN	NaN	NaN	NaN	NaN	NaN	NaN	NaN	NaN	NaN	NaN	NaN
41.75	54.9	0.3	0.3	0	0	70	70	7.34	37	0.04	21	15.77	20	3.8	NaN	NaN	NaN	NaN	NaN	NaN	NaN	NaN	NaN	NaN	NaN	NaN	NaN	NaN	NaN	NaN	NaN	NaN	NaN	NaN	NaN	NaN	NaN
42	54.3	0.3	0.3	0	0	70	70	7.34	37	0.04	21	15.77	20	3.8	NaN	NaN	NaN	NaN	NaN	NaN	NaN	NaN	NaN	NaN	NaN	NaN	NaN	NaN	NaN	NaN	NaN	NaN	NaN	NaN	NaN	NaN	NaN
42.25	54.4	0.3	0.3	0	0	70	70	7.34	37	0.04	21	15.77	20	3.8	NaN	NaN	NaN	NaN	NaN	NaN	NaN	NaN	NaN	NaN	NaN	NaN	NaN	NaN	NaN	NaN	NaN	NaN	NaN	NaN	NaN	NaN	NaN
42.5	54.8	0.3	0.3	0	0	70	70	7.33	37	0.04	21	15.77	20	3.8	NaN	NaN	NaN	NaN	NaN	NaN	NaN	NaN	NaN	NaN	NaN	NaN	NaN	NaN	NaN	NaN	NaN	NaN	NaN	NaN	NaN	NaN	NaN
42.75	53.7	0.3	0.3	0	0	70	70	7.33	37	0.04	21	15.77	20	3.8	NaN	NaN	NaN	NaN	NaN	NaN	NaN	NaN	NaN	NaN	NaN	NaN	NaN	NaN	NaN	NaN	NaN	NaN	NaN	NaN	NaN	NaN	NaN
43	52.8	0.3	0.3	0	0	70	70	7.33	37	0.04	21	15.77	20	3.8	NaN	NaN	NaN	NaN	NaN	NaN	NaN	NaN	NaN	NaN	NaN	NaN	NaN	NaN	NaN	NaN	NaN	NaN	NaN	NaN	NaN	NaN	NaN
43.25	51.4	0.3	0.3	0	0	70	70	7.32	37	0.04	21	15.77	20	3.8	NaN	NaN	NaN	NaN	NaN	NaN	NaN	NaN	NaN	NaN	NaN	NaN	NaN	NaN	NaN	NaN	NaN	NaN	NaN	NaN	NaN	NaN	NaN
43.5	49.6	0.3	0.3	0	0	70	70	7.32	37	0.04	21.06	15.77	20	3.8	NaN	NaN	NaN	NaN	NaN	NaN	NaN	NaN	NaN	NaN	NaN	NaN	NaN	NaN	NaN	NaN	NaN	NaN	NaN	NaN	NaN	NaN	NaN
43.75	49	0.34	0.34	0	0	70	70	7.31	37	0.04	21.42	15.77	20	3.8	NaN	NaN	NaN	NaN	NaN	NaN	NaN	NaN	NaN	NaN	NaN	NaN	NaN	NaN	NaN	NaN	NaN	NaN	NaN	NaN	NaN	NaN	NaN
44	49.9	0.35	0.35	0	0	70	70	7.31	37	0.04	21.58	15.77	20	3.8	680	2.2	1.496	NaN	NaN	NaN	0.84	0.0365217	NaN	475000	1.76842e-06	1.07933	1310	1.3	14.56	0.880556	49.9974	0.0138717	NaN	NaN	NaN	NaN	NaN
44.25	50.6	0.33	0.33	0	0	70	70	7.31	37	0.04	21.33	15.77	20	3.8	NaN	NaN	NaN	NaN	NaN	NaN	NaN	NaN	NaN	NaN	NaN	NaN	NaN	NaN	NaN	NaN	NaN	NaN	NaN	NaN	NaN	NaN	NaN
44.5	49.9	0.33	0.33	0	0	70	70	7.31	37	0.04	21.37	15.77	20	3.8	NaN	NaN	NaN	NaN	NaN	NaN	NaN	NaN	NaN	NaN	NaN	NaN	NaN	NaN	NaN	NaN	NaN	NaN	NaN	NaN	NaN	NaN	NaN
44.75	49.6	0.34	0.34	0	0	70	70	7.3	37	0.04	21.44	15.77	20	3.8	NaN	NaN	NaN	NaN	NaN	NaN	NaN	NaN	NaN	NaN	NaN	NaN	NaN	NaN	NaN	NaN	NaN	NaN	NaN	NaN	NaN	NaN	NaN
45	49.7	0.36	0.35	0	0	70	70	7.3	37	0.04	21.62	15.77	20	3.8	NaN	NaN	NaN	1.386	2.3584	3.46824	NaN	NaN	NaN	NaN	NaN	NaN	NaN	NaN	NaN	NaN	NaN	NaN	NaN	NaN	NaN	NaN	NaN
45.25	50.8	0.34	0.34	0	0	70	70	7.3	37	0.04	21.47	15.77	20	3.8	NaN	NaN	NaN	NaN	NaN	NaN	NaN	NaN	NaN	NaN	NaN	NaN	NaN	NaN	NaN	NaN	NaN	NaN	NaN	NaN	NaN	NaN	NaN
45.5	51.5	0.3	0.3	0	0	70	70	7.3	37	0.04	21	15.77	20	3.8	NaN	NaN	NaN	NaN	NaN	NaN	NaN	NaN	NaN	NaN	NaN	NaN	NaN	NaN	NaN	NaN	NaN	NaN	NaN	NaN	NaN	NaN	NaN
45.75	50.5	0.3	0.3	0	0	70	70	7.29	37	0.04	21	15.77	20	3.8	NaN	NaN	NaN	NaN	NaN	NaN	NaN	NaN	NaN	NaN	NaN	NaN	NaN	NaN	NaN	NaN	NaN	NaN	NaN	NaN	NaN	NaN	NaN
46	48.6	0.33	0.33	0	0	70	70	7.29	37	0.04	21.36	15.77	20	3.8	NaN	NaN	NaN	NaN	NaN	NaN	NaN	NaN	NaN	NaN	NaN	NaN	NaN	NaN	NaN	NaN	NaN	NaN	NaN	NaN	NaN	NaN	NaN
46.25	48.4	0.39	0.38	0	0	70	70	7.28	37	0.04	21.92	15.77	20	3.8	NaN	NaN	NaN	NaN	NaN	NaN	NaN	NaN	NaN	NaN	NaN	NaN	NaN	NaN	NaN	NaN	NaN	NaN	NaN	NaN	NaN	NaN	NaN
46.5	53.2	0.32	0.32	0	0	70	70	7.28	37	0.04	21.2	15.77	20	3.8	NaN	NaN	NaN	NaN	NaN	NaN	NaN	NaN	NaN	NaN	NaN	NaN	NaN	NaN	NaN	NaN	NaN	NaN	NaN	NaN	NaN	NaN	NaN
46.75	53.9	0.3	0.3	0	0	70	70	7.28	37	0.04	21	15.77	20	3.8	NaN	NaN	NaN	NaN	NaN	NaN	NaN	NaN	NaN	NaN	NaN	NaN	NaN	NaN	NaN	NaN	NaN	NaN	NaN	NaN	NaN	NaN	NaN
47	52.9	0.3	0.3	0	0	70	70	7.27	37	0.04	21	15.77	20	3.8	NaN	NaN	NaN	NaN	NaN	NaN	NaN	NaN	NaN	NaN	NaN	NaN	NaN	NaN	NaN	NaN	NaN	NaN	NaN	NaN	NaN	NaN	NaN
47.25	52.2	0.3	0.3	0	0	70	70	7.27	37	0.04	21	15.77	20	3.8	NaN	NaN	NaN	NaN	NaN	NaN	NaN	NaN	NaN	NaN	NaN	NaN	NaN	NaN	NaN	NaN	NaN	NaN	NaN	NaN	NaN	NaN	NaN
47.5	50.6	0.3	0.3	0	0	70	70	7.26	37	0.04	21	15.77	20	3.8	NaN	NaN	NaN	NaN	NaN	NaN	NaN	NaN	NaN	NaN	NaN	NaN	NaN	NaN	NaN	NaN	NaN	NaN	NaN	NaN	NaN	NaN	NaN
47.75	48.9	0.32	0.32	0	0	70	70	7.26	37	0.04	21.28	15.77	20	3.8	NaN	NaN	NaN	NaN	NaN	NaN	NaN	NaN	NaN	NaN	NaN	NaN	NaN	NaN	NaN	NaN	NaN	NaN	NaN	NaN	NaN	NaN	NaN
48	48.7	0.37	0.37	0	0	70	70	7.25	37	0.04	21.76	15.77	20	3.8	NaN	NaN	NaN	NaN	NaN	NaN	NaN	NaN	NaN	NaN	NaN	NaN	NaN	NaN	NaN	NaN	NaN	NaN	NaN	NaN	NaN	NaN	NaN
48.25	48.4	0.41	0.4	0	0.01	70	70	7.25	37	0.04	22.19	15.77	20	3.8	NaN	NaN	NaN	NaN	NaN	NaN	NaN	NaN	NaN	NaN	NaN	NaN	NaN	NaN	NaN	NaN	NaN	NaN	NaN	NaN	NaN	NaN	NaN
48.5	48.8	0.46	0.45	0	0.01	70	70	7.25	37	0.04	22.7	15.77	20	3.8	NaN	NaN	NaN	NaN	NaN	NaN	NaN	NaN	NaN	NaN	NaN	NaN	NaN	NaN	NaN	NaN	NaN	NaN	NaN	NaN	NaN	NaN	NaN
48.75	52.2	0.43	0.42	0	0.01	70	70	7.25	37	0.04	22.32	15.77	20	3.8	NaN	NaN	NaN	NaN	NaN	NaN	NaN	NaN	NaN	NaN	NaN	NaN	NaN	NaN	NaN	NaN	NaN	NaN	NaN	NaN	NaN	NaN	NaN
49	51.9	0	0	0	0	70	70	7.25	36.5	0	0	15.77	20	3.8	NaN	NaN	NaN	NaN	NaN	NaN	NaN	NaN	NaN	NaN	NaN	NaN	NaN	NaN	NaN	NaN	NaN	NaN	NaN	NaN	NaN	NaN	NaN
49.25	53	0	0	0	0	70	70	7.26	34.9	0	0	15.77	20	3.8	NaN	NaN	NaN	NaN	NaN	NaN	NaN	NaN	NaN	NaN	NaN	NaN	NaN	NaN	NaN	NaN	NaN	NaN	NaN	NaN	NaN	NaN	NaN
49.5	93.2	0.3	0.3	0	0	70	70	7.32	41.1	0.04	21	15.77	20	3.8	NaN	NaN	NaN	NaN	NaN	NaN	NaN	NaN	NaN	NaN	NaN	NaN	NaN	NaN	NaN	NaN	NaN	NaN	NaN	NaN	NaN	NaN	NaN
49.75	80.4	0.3	0.3	0	0	70	70	7.35	35.4	0.09	21	15.77	20	3.8	NaN	NaN	NaN	NaN	NaN	NaN	NaN	NaN	NaN	NaN	NaN	NaN	NaN	NaN	NaN	NaN	NaN	NaN	NaN	NaN	NaN	NaN	NaN
50	75.9	0.3	0.3	0	0	70	70	7.37	37.3	0.49	21	15.77	20	3.8	NaN	NaN	NaN	NaN	NaN	NaN	NaN	NaN	NaN	NaN	NaN	NaN	NaN	NaN	NaN	NaN	NaN	NaN	NaN	NaN	NaN	NaN	NaN
50.25	71.2	0.3	0.3	0	0	70	70	7.36	38	0.41	21	15.77	20	3.8	NaN	NaN	NaN	NaN	NaN	NaN	NaN	NaN	NaN	NaN	NaN	NaN	NaN	NaN	NaN	NaN	NaN	NaN	NaN	NaN	NaN	NaN	NaN
50.5	64.8	0.3	0.3	0	0	70	70	7.38	36.1	0.94	21	15.77	20	3.8	NaN	NaN	NaN	NaN	NaN	NaN	NaN	NaN	NaN	NaN	NaN	NaN	NaN	NaN	NaN	NaN	NaN	NaN	NaN	NaN	NaN	NaN	NaN
50.75	62.8	0.3	0.3	0	0	70	70	7.37	37.8	0.94	21	15.77	20	3.8	NaN	NaN	NaN	NaN	NaN	NaN	NaN	NaN	NaN	NaN	NaN	NaN	NaN	NaN	NaN	NaN	NaN	NaN	NaN	NaN	NaN	NaN	NaN
51	58.9	0.3	0.3	0	0	70	70	7.36	37	0.74	21	15.77	20	3.8	NaN	NaN	NaN	NaN	NaN	NaN	NaN	NaN	NaN	NaN	NaN	NaN	NaN	NaN	NaN	NaN	NaN	NaN	NaN	NaN	NaN	NaN	NaN
51.25	54.1	0.3	0.3	0	0	70	70	7.36	36.5	0.76	21	15.77	20	3.8	NaN	NaN	NaN	NaN	NaN	NaN	NaN	NaN	NaN	NaN	NaN	NaN	NaN	NaN	NaN	NaN	NaN	NaN	NaN	NaN	NaN	NaN	NaN
51.5	51.7	0.3	0.3	0	0	70	70	7.35	37.5	0.04	21	15.77	20	3.8	NaN	NaN	NaN	NaN	NaN	NaN	NaN	NaN	NaN	NaN	NaN	NaN	NaN	NaN	NaN	NaN	NaN	NaN	NaN	NaN	NaN	NaN	NaN
51.75	50.1	0.3	0.3	0	0	70	70	7.34	37.2	0.04	21	15.77	20	3.8	NaN	NaN	NaN	NaN	NaN	NaN	NaN	NaN	NaN	NaN	NaN	NaN	NaN	NaN	NaN	NaN	NaN	NaN	NaN	NaN	NaN	NaN	NaN
52	49.5	0.31	0.31	0	0	70	70	7.35	36.6	0.04	21.1	15.77	20	3.8	NaN	NaN	NaN	NaN	NaN	NaN	NaN	NaN	NaN	NaN	NaN	NaN	NaN	NaN	NaN	NaN	NaN	NaN	NaN	NaN	NaN	NaN	NaN
52.25	50.3	0.3	0.3	0	0	70	70	7.35	37	0.04	21.06	15.77	20	3.8	NaN	NaN	NaN	NaN	NaN	NaN	NaN	NaN	NaN	NaN	NaN	NaN	NaN	NaN	NaN	NaN	NaN	NaN	NaN	NaN	NaN	NaN	NaN
52.5	47	0.36	0.35	0	0	70	70	7.34	37.2	0.04	21.63	15.77	20	3.8	NaN	NaN	NaN	NaN	NaN	NaN	NaN	NaN	NaN	NaN	NaN	NaN	NaN	NaN	NaN	NaN	NaN	NaN	NaN	NaN	NaN	NaN	NaN
52.75	44.6	0.53	0.52	0	0.02	70	70	7.34	37	0.04	23.48	15.77	20	3.8	NaN	NaN	NaN	NaN	NaN	NaN	NaN	NaN	NaN	NaN	NaN	NaN	NaN	NaN	NaN	NaN	NaN	NaN	NaN	NaN	NaN	NaN	NaN
53	48.6	0.62	0.59	0	0.03	70	70	7.35	36.9	0.04	24.41	15.77	20	3.8	NaN	NaN	NaN	NaN	NaN	NaN	NaN	NaN	NaN	NaN	NaN	NaN	NaN	NaN	NaN	NaN	NaN	NaN	NaN	NaN	NaN	NaN	NaN
53.25	55.1	0.48	0.47	0	0.01	70	70	7.36	37	0.23	23.01	15.77	20	3.8	NaN	NaN	NaN	NaN	NaN	NaN	NaN	NaN	NaN	NaN	NaN	NaN	NaN	NaN	NaN	NaN	NaN	NaN	NaN	NaN	NaN	NaN	NaN
53.5	57.1	0.3	0.3	0	0	70	70	7.36	37.1	0.36	21.02	15.77	20	3.8	NaN	NaN	NaN	NaN	NaN	NaN	NaN	NaN	NaN	NaN	NaN	NaN	NaN	NaN	NaN	NaN	NaN	NaN	NaN	NaN	NaN	NaN	NaN
53.75	55.1	0.3	0.3	0	0	70	70	7.36	37	0.4	21	15.77	20	3.8	NaN	NaN	NaN	NaN	NaN	NaN	NaN	NaN	NaN	NaN	NaN	NaN	NaN	NaN	NaN	NaN	NaN	NaN	NaN	NaN	NaN	NaN	NaN
54	53.3	0.3	0.3	0	0	70	70	7.36	36.9	0.42	21	15.77	20	3.8	NaN	NaN	NaN	NaN	NaN	NaN	NaN	NaN	NaN	NaN	NaN	NaN	NaN	NaN	NaN	NaN	NaN	NaN	NaN	NaN	NaN	NaN	NaN
54.25	52.6	0.3	0.3	0	0	70	70	7.36	37	0.46	21	15.77	20	3.8	NaN	NaN	NaN	NaN	NaN	NaN	NaN	NaN	NaN	NaN	NaN	NaN	NaN	NaN	NaN	NaN	NaN	NaN	NaN	NaN	NaN	NaN	NaN
54.5	50.1	0.3	0.3	0	0	70	70	7.35	37	0.04	21	15.77	20	3.8	NaN	NaN	NaN	NaN	NaN	NaN	NaN	NaN	NaN	NaN	NaN	NaN	NaN	NaN	NaN	NaN	NaN	NaN	NaN	NaN	NaN	NaN	NaN
54.75	48.4	0.34	0.34	0	0	70	70	7.35	37	0.04	21.44	15.77	20	3.8	NaN	NaN	NaN	NaN	NaN	NaN	NaN	NaN	NaN	NaN	NaN	NaN	NaN	NaN	NaN	NaN	NaN	NaN	NaN	NaN	NaN	NaN	NaN
55	47.9	0.41	0.4	0	0.01	70	70	7.35	37	0.04	22.21	15.77	20	3.8	NaN	NaN	NaN	NaN	NaN	NaN	NaN	NaN	NaN	NaN	NaN	NaN	NaN	NaN	NaN	NaN	NaN	NaN	NaN	NaN	NaN	NaN	NaN
55.25	50.8	0.43	0.42	0	0.01	70	70	7.35	37	0.04	22.37	15.77	20	3.8	NaN	NaN	NaN	NaN	NaN	NaN	NaN	NaN	NaN	NaN	NaN	NaN	NaN	NaN	NaN	NaN	NaN	NaN	NaN	NaN	NaN	NaN	NaN
55.5	51.1	0.38	0.38	0	0	70	70	7.34	37	0.04	21.88	15.77	20	3.8	NaN	NaN	NaN	NaN	NaN	NaN	NaN	NaN	NaN	NaN	NaN	NaN	NaN	NaN	NaN	NaN	NaN	NaN	NaN	NaN	NaN	NaN	NaN
55.75	50.7	0.36	0.35	0	0	70	70	7.34	37	0.04	21.66	15.77	20	3.8	NaN	NaN	NaN	NaN	NaN	NaN	NaN	NaN	NaN	NaN	NaN	NaN	NaN	NaN	NaN	NaN	NaN	NaN	NaN	NaN	NaN	NaN	NaN
56	47.6	0.43	0.42	0	0.01	70	70	7.34	37	0.04	22.38	15.77	20	3.8	NaN	NaN	NaN	NaN	NaN	NaN	NaN	NaN	NaN	NaN	NaN	NaN	NaN	NaN	NaN	NaN	NaN	NaN	NaN	NaN	NaN	NaN	NaN
56.25	47.4	0.5	0.49	0	0.01	70	70	7.34	37	0.04	23.15	15.77	20	3.8	NaN	NaN	NaN	NaN	NaN	NaN	NaN	NaN	NaN	NaN	NaN	NaN	NaN	NaN	NaN	NaN	NaN	NaN	NaN	NaN	NaN	NaN	NaN
56.5	49.8	0.53	0.51	0	0.02	70	70	7.34	37	0.04	23.43	15.77	20	3.8	NaN	NaN	NaN	NaN	NaN	NaN	NaN	NaN	NaN	NaN	NaN	NaN	NaN	NaN	NaN	NaN	NaN	NaN	NaN	NaN	NaN	NaN	NaN
56.75	52.1	0.48	0.46	0	0.01	70	70	7.34	37	0.04	22.87	15.77	20	3.8	NaN	NaN	NaN	NaN	NaN	NaN	NaN	NaN	NaN	NaN	NaN	NaN	NaN	NaN	NaN	NaN	NaN	NaN	NaN	NaN	NaN	NaN	NaN
57	52.9	0.4	0.4	0	0.01	70	70	7.34	37	0.04	22.06	15.77	20	3.8	NaN	NaN	NaN	NaN	NaN	NaN	NaN	NaN	NaN	NaN	NaN	NaN	NaN	NaN	NaN	NaN	NaN	NaN	NaN	NaN	NaN	NaN	NaN
57.25	49	0.39	0.38	0	0	70	70	7.33	37	0.04	21.93	15.77	20	3.8	NaN	NaN	NaN	NaN	NaN	NaN	NaN	NaN	NaN	NaN	NaN	NaN	NaN	NaN	NaN	NaN	NaN	NaN	NaN	NaN	NaN	NaN	NaN
57.5	45.6	0.51	0.5	0	0.02	70	70	7.33	37	0.04	23.32	15.77	20	3.8	NaN	NaN	NaN	NaN	NaN	NaN	NaN	NaN	NaN	NaN	NaN	NaN	NaN	NaN	NaN	NaN	NaN	NaN	NaN	NaN	NaN	NaN	NaN
57.75	47.5	0.61	0.58	0	0.03	70	70	7.33	37	0.04	24.23	15.77	20	3.8	NaN	NaN	NaN	NaN	NaN	NaN	NaN	NaN	NaN	NaN	NaN	NaN	NaN	NaN	NaN	NaN	NaN	NaN	NaN	NaN	NaN	NaN	NaN
58	51.5	0.58	0.56	0	0.02	70	70	7.33	37	0.04	23.94	15.77	20	3.8	NaN	NaN	NaN	NaN	NaN	NaN	NaN	NaN	NaN	NaN	NaN	NaN	NaN	NaN	NaN	NaN	NaN	NaN	NaN	NaN	NaN	NaN	NaN
58.25	53.2	0.48	0.47	0	0.01	70	70	7.33	37	0.04	22.91	15.77	20	3.8	NaN	NaN	NaN	NaN	NaN	NaN	NaN	NaN	NaN	NaN	NaN	NaN	NaN	NaN	NaN	NaN	NaN	NaN	NaN	NaN	NaN	NaN	NaN
58.5	52.9	0.4	0.39	0	0.01	70	70	7.33	37	0.04	22.04	15.77	20	3.8	NaN	NaN	NaN	NaN	NaN	NaN	NaN	NaN	NaN	NaN	NaN	NaN	NaN	NaN	NaN	NaN	NaN	NaN	NaN	NaN	NaN	NaN	NaN
58.75	50.9	0.36	0.35	0	0	70	70	7.32	37	0.04	21.61	15.77	20	3.8	NaN	NaN	NaN	NaN	NaN	NaN	NaN	NaN	NaN	NaN	NaN	NaN	NaN	NaN	NaN	NaN	NaN	NaN	NaN	NaN	NaN	NaN	NaN
59	48.1	0.39	0.39	0	0.01	70	70	7.32	37	0.04	22.02	15.77	20	3.8	NaN	NaN	NaN	NaN	NaN	NaN	NaN	NaN	NaN	NaN	NaN	NaN	NaN	NaN	NaN	NaN	NaN	NaN	NaN	NaN	NaN	NaN	NaN
59.25	46.9	0.51	0.5	0	0.01	70	70	7.31	37	0.04	23.3	15.77	20	3.8	NaN	NaN	NaN	NaN	NaN	NaN	NaN	NaN	NaN	NaN	NaN	NaN	NaN	NaN	NaN	NaN	NaN	NaN	NaN	NaN	NaN	NaN	NaN
59.5	48.7	0.59	0.57	0	0.02	70	70	7.31	37	0.04	24.12	15.77	20	3.8	NaN	NaN	NaN	NaN	NaN	NaN	NaN	NaN	NaN	NaN	NaN	NaN	NaN	NaN	NaN	NaN	NaN	NaN	NaN	NaN	NaN	NaN	NaN
59.75	51.8	0.55	0.53	0	0.02	70	70	7.31	37	0.04	23.66	15.77	20	3.8	NaN	NaN	NaN	NaN	NaN	NaN	NaN	NaN	NaN	NaN	NaN	NaN	NaN	NaN	NaN	NaN	NaN	NaN	NaN	NaN	NaN	NaN	NaN
60	51.7	0.49	0.48	0	0.01	70	70	7.31	37	0.04	23.01	15.77	20	3.8	NaN	NaN	NaN	NaN	NaN	NaN	NaN	NaN	NaN	NaN	NaN	NaN	NaN	NaN	NaN	NaN	NaN	NaN	NaN	NaN	NaN	NaN	NaN
60.25	51.9	0.42	0.42	0	0.01	70	70	7.3	37	0.04	22.32	15.77	20	3.8	NaN	NaN	NaN	NaN	NaN	NaN	NaN	NaN	NaN	NaN	NaN	NaN	NaN	NaN	NaN	NaN	NaN	NaN	NaN	NaN	NaN	NaN	NaN
60.5	48.2	0.47	0.46	0	0.01	70	70	7.29	37	0.04	22.8	15.77	20	3.8	NaN	NaN	NaN	NaN	NaN	NaN	NaN	NaN	NaN	NaN	NaN	NaN	NaN	NaN	NaN	NaN	NaN	NaN	NaN	NaN	NaN	NaN	NaN
60.75	49.6	0.48	0.47	0	0.01	70	70	7.29	37	0.04	22.89	15.77	20	3.8	NaN	NaN	NaN	NaN	NaN	NaN	NaN	NaN	NaN	NaN	NaN	NaN	NaN	NaN	NaN	NaN	NaN	NaN	NaN	NaN	NaN	NaN	NaN
61	51.2	0.46	0.45	0	0.01	70	70	7.29	37	0.04	22.76	15.77	20	3.8	NaN	NaN	NaN	NaN	NaN	NaN	NaN	NaN	NaN	NaN	NaN	NaN	NaN	NaN	NaN	NaN	NaN	NaN	NaN	NaN	NaN	NaN	NaN
61.25	49.3	0.48	0.47	0	0.01	70	70	7.28	37	0.04	22.91	15.77	20	3.8	NaN	NaN	NaN	NaN	NaN	NaN	NaN	NaN	NaN	NaN	NaN	NaN	NaN	NaN	NaN	NaN	NaN	NaN	NaN	NaN	NaN	NaN	NaN
61.5	50.9	0.44	0.43	0	0.01	70	70	7.28	37	0.04	22.45	15.77	20	3.8	NaN	NaN	NaN	NaN	NaN	NaN	NaN	NaN	NaN	NaN	NaN	NaN	NaN	NaN	NaN	NaN	NaN	NaN	NaN	NaN	NaN	NaN	NaN
61.75	49.2	0.47	0.46	0	0.01	70	70	7.27	37	0.04	22.81	15.77	20	3.8	NaN	NaN	NaN	NaN	NaN	NaN	NaN	NaN	NaN	NaN	NaN	NaN	NaN	NaN	NaN	NaN	NaN	NaN	NaN	NaN	NaN	NaN	NaN
62	47.7	0.52	0.51	0	0.02	70	70	7.27	37	0.04	23.4	15.77	20	3.8	NaN	NaN	NaN	NaN	NaN	NaN	NaN	NaN	NaN	NaN	NaN	NaN	NaN	NaN	NaN	NaN	NaN	NaN	NaN	NaN	NaN	NaN	NaN
62.25	47.8	0.58	0.56	0	0.02	70	70	7.26	37	0.04	23.98	15.77	20	3.8	NaN	NaN	NaN	NaN	NaN	NaN	NaN	NaN	NaN	NaN	NaN	NaN	NaN	NaN	NaN	NaN	NaN	NaN	NaN	NaN	NaN	NaN	NaN
62.5	49.6	0.62	0.6	0	0.03	70	70	7.26	37	0.04	24.42	15.77	20	3.8	NaN	NaN	NaN	NaN	NaN	NaN	NaN	NaN	NaN	NaN	NaN	NaN	NaN	NaN	NaN	NaN	NaN	NaN	NaN	NaN	NaN	NaN	NaN
62.75	51.7	0.57	0.55	0	0.02	70	70	7.25	37	0.04	23.84	15.77	20	3.8	NaN	NaN	NaN	NaN	NaN	NaN	NaN	NaN	NaN	NaN	NaN	NaN	NaN	NaN	NaN	NaN	NaN	NaN	NaN	NaN	NaN	NaN	NaN
63	50.4	0.52	0.5	0	0.02	70	70	7.25	37	0.04	23.33	15.77	20	3.8	NaN	NaN	NaN	NaN	NaN	NaN	NaN	NaN	NaN	NaN	NaN	NaN	NaN	NaN	NaN	NaN	NaN	NaN	NaN	NaN	NaN	NaN	NaN
63.25	48.1	0.55	0.53	0	0.02	70	70	7.24	37	0.04	23.75	15.77	20	3.8	NaN	NaN	NaN	NaN	NaN	NaN	NaN	NaN	NaN	NaN	NaN	NaN	NaN	NaN	NaN	NaN	NaN	NaN	NaN	NaN	NaN	NaN	NaN
63.5	50.3	0.56	0.54	0	0.02	70	70	7.24	37	0.04	23.8	15.77	20	3.8	NaN	NaN	NaN	NaN	NaN	NaN	NaN	NaN	NaN	NaN	NaN	NaN	NaN	NaN	NaN	NaN	NaN	NaN	NaN	NaN	NaN	NaN	NaN
63.75	51.3	0.53	0.51	0	0.02	70	70	7.24	37	0.04	23.39	15.77	20	3.8	NaN	NaN	NaN	NaN	NaN	NaN	NaN	NaN	NaN	NaN	NaN	NaN	NaN	NaN	NaN	NaN	NaN	NaN	NaN	NaN	NaN	NaN	NaN
64	51	0.5	0.49	0	0.01	70	70	7.23	37	0.04	23.11	15.77	20	3.8	NaN	NaN	NaN	NaN	NaN	NaN	NaN	NaN	NaN	NaN	NaN	NaN	NaN	NaN	NaN	NaN	NaN	NaN	NaN	NaN	NaN	NaN	NaN
64.25	48.9	0.52	0.5	0	0.01	70	70	7.23	37	0.04	23.37	15.77	20	3.8	NaN	NaN	NaN	NaN	NaN	NaN	NaN	NaN	NaN	NaN	NaN	NaN	NaN	NaN	NaN	NaN	NaN	NaN	NaN	NaN	NaN	NaN	NaN
64.5	49.2	0.52	0.51	0	0.02	70	70	7.23	37	0.04	23.37	15.77	20	3.8	NaN	NaN	NaN	NaN	NaN	NaN	NaN	NaN	NaN	NaN	NaN	NaN	NaN	NaN	NaN	NaN	NaN	NaN	NaN	NaN	NaN	NaN	NaN
64.75	49.4	0.52	0.5	0	0.02	70	70	7.25	37	0.04	23.34	15.77	20	3.8	NaN	NaN	NaN	NaN	NaN	NaN	NaN	NaN	NaN	NaN	NaN	NaN	NaN	NaN	NaN	NaN	NaN	NaN	NaN	NaN	NaN	NaN	NaN
65	49.6	0.51	0.5	0	0.02	70	70	7.25	37	0.04	23.3	15.77	20	3.8	NaN	NaN	NaN	NaN	NaN	NaN	NaN	NaN	NaN	NaN	NaN	NaN	NaN	NaN	NaN	NaN	NaN	NaN	NaN	NaN	NaN	NaN	NaN
65.25	48.8	0.55	0.53	0	0.02	70	70	7.25	37	0.04	23.65	15.77	20	3.8	NaN	NaN	NaN	NaN	NaN	NaN	NaN	NaN	NaN	NaN	NaN	NaN	NaN	NaN	NaN	NaN	NaN	NaN	NaN	NaN	NaN	NaN	NaN
65.5	48.5	0.58	0.56	0	0.02	70	70	7.25	37	0.04	23.99	15.77	20	3.8	NaN	NaN	NaN	NaN	NaN	NaN	NaN	NaN	NaN	NaN	NaN	NaN	NaN	NaN	NaN	NaN	NaN	NaN	NaN	NaN	NaN	NaN	NaN
65.75	49.7	0.6	0.57	0	0.02	70	70	7.25	37	0.04	24.11	15.77	20	3.8	NaN	NaN	NaN	NaN	NaN	NaN	NaN	NaN	NaN	NaN	NaN	NaN	NaN	NaN	NaN	NaN	NaN	NaN	NaN	NaN	NaN	NaN	NaN
66	50.4	0.59	0.57	0	0.02	70	70	7.25	37	0.04	24.11	15.77	20	3.8	NaN	NaN	NaN	NaN	NaN	NaN	NaN	NaN	NaN	NaN	NaN	NaN	NaN	NaN	NaN	NaN	NaN	NaN	NaN	NaN	NaN	NaN	NaN
66.25	51.1	0.55	0.53	0	0.02	70	70	7.25	37	0.04	23.69	15.77	20	3.8	NaN	NaN	NaN	NaN	NaN	NaN	NaN	NaN	NaN	NaN	NaN	NaN	NaN	NaN	NaN	NaN	NaN	NaN	NaN	NaN	NaN	NaN	NaN
66.5	49.5	0.53	0.51	0	0.02	70	70	7.24	37	0.04	23.52	15.77	20	3.8	NaN	NaN	NaN	NaN	NaN	NaN	NaN	NaN	NaN	NaN	NaN	NaN	NaN	NaN	NaN	NaN	NaN	NaN	NaN	NaN	NaN	NaN	NaN
66.75	47.3	0.61	0.58	0	0.03	70	70	7.25	37	0.04	24.29	15.77	20	3.8	NaN	NaN	NaN	NaN	NaN	NaN	NaN	NaN	NaN	NaN	NaN	NaN	NaN	NaN	NaN	NaN	NaN	NaN	NaN	NaN	NaN	NaN	NaN
67	47.1	0.71	0.67	0	0.04	70	70	7.25	37	0.04	25.32	15.77	20	3.8	NaN	NaN	NaN	NaN	NaN	NaN	NaN	NaN	NaN	NaN	NaN	NaN	NaN	NaN	NaN	NaN	NaN	NaN	NaN	NaN	NaN	NaN	NaN
67.25	48.9	0.76	0.72	0	0.05	70	70	7.25	37	0.04	25.87	15.77	20	3.8	NaN	NaN	NaN	NaN	NaN	NaN	NaN	NaN	NaN	NaN	NaN	NaN	NaN	NaN	NaN	NaN	NaN	NaN	NaN	NaN	NaN	NaN	NaN
67.5	53.6	0.67	0.63	0	0.03	70	70	7.25	37	0.04	24.99	15.77	20	3.8	NaN	NaN	NaN	NaN	NaN	NaN	NaN	NaN	NaN	NaN	NaN	NaN	NaN	NaN	NaN	NaN	NaN	NaN	NaN	NaN	NaN	NaN	NaN
67.75	53.3	0.54	0.52	0	0.02	70	70	7.25	37	0.04	23.58	15.77	20	3.8	NaN	NaN	NaN	NaN	NaN	NaN	NaN	NaN	NaN	NaN	NaN	NaN	NaN	NaN	NaN	NaN	NaN	NaN	NaN	NaN	NaN	NaN	NaN
68	51	0.48	0.47	0	0.01	70	70	7.24	37	0.04	22.96	15.77	20	3.8	NaN	NaN	NaN	NaN	NaN	NaN	NaN	NaN	NaN	NaN	NaN	NaN	NaN	NaN	NaN	NaN	NaN	NaN	NaN	NaN	NaN	NaN	NaN
68.25	49.8	0.49	0.48	0	0.01	70	70	7.25	37	0.04	23.04	15.77	20	3.8	NaN	NaN	NaN	NaN	NaN	NaN	NaN	NaN	NaN	NaN	NaN	NaN	NaN	NaN	NaN	NaN	NaN	NaN	NaN	NaN	NaN	NaN	NaN
68.5	48.7	0.55	0.53	0	0.02	70	70	7.24	37	0.04	23.64	15.77	20	3.8	NaN	NaN	NaN	NaN	NaN	NaN	NaN	NaN	NaN	NaN	NaN	NaN	NaN	NaN	NaN	NaN	NaN	NaN	NaN	NaN	NaN	NaN	NaN
68.75	48.3	0.61	0.59	0	0.03	70	70	7.25	37	0.04	24.31	15.77	20	3.8	NaN	NaN	NaN	NaN	NaN	NaN	NaN	NaN	NaN	NaN	NaN	NaN	NaN	NaN	NaN	NaN	NaN	NaN	NaN	NaN	NaN	NaN	NaN
69	48.9	0.66	0.63	0	0.03	70	70	7.25	37	0.04	24.89	15.77	20	3.8	NaN	NaN	NaN	NaN	NaN	NaN	NaN	NaN	NaN	NaN	NaN	NaN	NaN	NaN	NaN	NaN	NaN	NaN	NaN	NaN	NaN	NaN	NaN
69.25	50.3	0.66	0.63	0	0.03	70	70	7.24	37	0.04	24.79	15.77	20	3.8	NaN	NaN	NaN	NaN	NaN	NaN	NaN	NaN	NaN	NaN	NaN	NaN	NaN	NaN	NaN	NaN	NaN	NaN	NaN	NaN	NaN	NaN	NaN
69.5	51.2	0.65	0.62	0	0.03	70	70	7.25	37	0.04	24.7	15.77	20	3.8	NaN	NaN	NaN	NaN	NaN	NaN	NaN	NaN	NaN	NaN	NaN	NaN	NaN	NaN	NaN	NaN	NaN	NaN	NaN	NaN	NaN	NaN	NaN
69.75	50.9	0.62	0.59	0	0.03	70	70	7.25	37	0.04	24.46	15.77	20	3.8	NaN	NaN	NaN	NaN	NaN	NaN	NaN	NaN	NaN	NaN	NaN	NaN	NaN	NaN	NaN	NaN	NaN	NaN	NaN	NaN	NaN	NaN	NaN
70	50.7	0.6	0.58	0	0.02	70	70	7.25	37	0.04	24.2	15.77	20	3.8	NaN	NaN	NaN	NaN	NaN	NaN	NaN	NaN	NaN	NaN	NaN	NaN	NaN	NaN	NaN	NaN	NaN	NaN	NaN	NaN	NaN	NaN	NaN
70.25	48.2	0.65	0.62	0	0.03	70	70	7.24	37	0.04	24.72	15.77	20	3.8	NaN	NaN	NaN	NaN	NaN	NaN	NaN	NaN	NaN	NaN	NaN	NaN	NaN	NaN	NaN	NaN	NaN	NaN	NaN	NaN	NaN	NaN	NaN
70.5	48.9	0.7	0.66	0	0.04	70	70	7.25	37	0.04	25.23	15.77	20	3.8	NaN	NaN	NaN	NaN	NaN	NaN	NaN	NaN	NaN	NaN	NaN	NaN	NaN	NaN	NaN	NaN	NaN	NaN	NaN	NaN	NaN	NaN	NaN
70.75	51	0.68	0.65	0	0.04	70	70	7.25	37	0.04	25.08	15.77	20	3.8	NaN	NaN	NaN	NaN	NaN	NaN	NaN	NaN	NaN	NaN	NaN	NaN	NaN	NaN	NaN	NaN	NaN	NaN	NaN	NaN	NaN	NaN	NaN
71	51.6	0.63	0.6	0	0.03	80	70	7.25	37	0.04	24.49	15.77	20	3.8	NaN	NaN	NaN	NaN	NaN	NaN	NaN	NaN	NaN	NaN	NaN	NaN	NaN	NaN	NaN	NaN	NaN	NaN	NaN	NaN	NaN	NaN	NaN
71.25	49.9	0.63	0.6	0	0.03	70	70	7.24	37	0.04	24.5	15.77	20	3.8	NaN	NaN	NaN	NaN	NaN	NaN	NaN	NaN	NaN	NaN	NaN	NaN	NaN	NaN	NaN	NaN	NaN	NaN	NaN	NaN	NaN	NaN	NaN
71.5	46.2	0.71	0.67	0	0.04	70	70	7.25	37	0.04	25.41	15.77	20	3.8	NaN	NaN	NaN	NaN	NaN	NaN	NaN	NaN	NaN	NaN	NaN	NaN	NaN	NaN	NaN	NaN	NaN	NaN	NaN	NaN	NaN	NaN	NaN
71.75	47.6	0.79	0.74	0	0.05	70	70	7.25	37	0.04	26.43	15.77	20	3.8	NaN	NaN	NaN	NaN	NaN	NaN	NaN	NaN	NaN	NaN	NaN	NaN	NaN	NaN	NaN	NaN	NaN	NaN	NaN	NaN	NaN	NaN	NaN
72	50.9	0.78	0.73	0	0.05	70	70	7.25	37	0.04	26.1	15.77	20	3.8	670	1.7	1.139	0	1.139	1.7	1.76824	0.0631513	NaN	845000	2.09259e-06	2.84757	217	2.2	24.64	1.71158	42.0908	0.0164775	NaN	NaN	NaN	NaN	NaN
72.25	52.2	0.71	0.67	0	0.04	70	70	7.25	37	0.04	25.33	15.77	20	3.8	NaN	NaN	NaN	NaN	NaN	NaN	NaN	NaN	NaN	NaN	NaN	NaN	NaN	NaN	NaN	NaN	NaN	NaN	NaN	NaN	NaN	NaN	NaN
72.5	52.6	0.62	0.6	0	0.03	70	70	7.25	37	0.04	24.42	15.77	20	3.8	NaN	NaN	NaN	NaN	NaN	NaN	NaN	NaN	NaN	NaN	NaN	NaN	NaN	NaN	NaN	NaN	NaN	NaN	NaN	NaN	NaN	NaN	NaN
72.75	51.2	0.58	0.56	0	0.02	70	70	7.25	37	0.04	23.99	15.77	20	3.8	NaN	NaN	NaN	NaN	NaN	NaN	NaN	NaN	NaN	NaN	NaN	NaN	NaN	NaN	NaN	NaN	NaN	NaN	NaN	NaN	NaN	NaN	NaN
73	48.9	0.61	0.58	0	0.03	70	70	7.25	37	0.04	24.29	15.77	20	3.8	NaN	NaN	NaN	NaN	NaN	NaN	NaN	NaN	NaN	NaN	NaN	NaN	NaN	NaN	NaN	NaN	NaN	NaN	NaN	NaN	NaN	NaN	NaN
73.25	47.6	0.7	0.66	0	0.04	70	70	7.25	37	0.04	25.2	15.77	20	3.8	NaN	NaN	NaN	NaN	NaN	NaN	NaN	NaN	NaN	NaN	NaN	NaN	NaN	NaN	NaN	NaN	NaN	NaN	NaN	NaN	NaN	NaN	NaN
73.5	47.9	0.77	0.72	0	0.05	70	70	7.25	37	0.04	26.05	15.77	20	3.8	NaN	NaN	NaN	NaN	NaN	NaN	NaN	NaN	NaN	NaN	NaN	NaN	NaN	NaN	NaN	NaN	NaN	NaN	NaN	NaN	NaN	NaN	NaN
73.75	51.4	0.75	0.7	0	0.04	70	70	7.25	37	0.04	25.74	15.77	20	3.8	NaN	NaN	NaN	NaN	NaN	NaN	NaN	NaN	NaN	NaN	NaN	NaN	NaN	NaN	NaN	NaN	NaN	NaN	NaN	NaN	NaN	NaN	NaN
74	51.9	0.69	0.66	0	0.04	70	70	7.24	37	0.04	25.14	15.77	20	3.8	NaN	NaN	NaN	NaN	NaN	NaN	NaN	NaN	NaN	NaN	NaN	NaN	NaN	NaN	NaN	NaN	NaN	NaN	NaN	NaN	NaN	NaN	NaN
74.25	52	0.63	0.61	0	0.03	70	70	7.25	37	0.04	24.54	15.77	20	3.8	NaN	NaN	NaN	NaN	NaN	NaN	NaN	NaN	NaN	NaN	NaN	NaN	NaN	NaN	NaN	NaN	NaN	NaN	NaN	NaN	NaN	NaN	NaN
74.5	49.7	0.62	0.59	0	0.03	70	70	7.24	37	0.04	24.36	15.77	20	3.8	NaN	NaN	NaN	NaN	NaN	NaN	NaN	NaN	NaN	NaN	NaN	NaN	NaN	NaN	NaN	NaN	NaN	NaN	NaN	NaN	NaN	NaN	NaN
74.75	48.1	0.68	0.64	0	0.03	70	70	7.25	37	0.04	25.04	15.77	20	3.8	NaN	NaN	NaN	NaN	NaN	NaN	NaN	NaN	NaN	NaN	NaN	NaN	NaN	NaN	NaN	NaN	NaN	NaN	NaN	NaN	NaN	NaN	NaN
75	47.9	0.74	0.7	0	0.04	70	70	7.25	37	0.04	25.77	15.77	20	3.8	NaN	NaN	NaN	NaN	NaN	NaN	NaN	NaN	NaN	NaN	NaN	NaN	NaN	NaN	NaN	NaN	NaN	NaN	NaN	NaN	NaN	NaN	NaN
75.25	50.1	0.77	0.72	0	0.05	70	70	7.25	37	0.04	25.9	15.77	20	3.8	NaN	NaN	NaN	NaN	NaN	NaN	NaN	NaN	NaN	NaN	NaN	NaN	NaN	NaN	NaN	NaN	NaN	NaN	NaN	NaN	NaN	NaN	NaN
75.5	52.4	0.7	0.66	0	0.04	70	70	7.25	37	0.04	25.26	15.77	20	3.8	NaN	NaN	NaN	NaN	NaN	NaN	NaN	NaN	NaN	NaN	NaN	NaN	NaN	NaN	NaN	NaN	NaN	NaN	NaN	NaN	NaN	NaN	NaN
75.75	49.1	0.71	0.67	0	0.04	70	70	7.25	37	0.04	25.34	15.77	20	3.8	NaN	NaN	NaN	NaN	NaN	NaN	NaN	NaN	NaN	NaN	NaN	NaN	NaN	NaN	NaN	NaN	NaN	NaN	NaN	NaN	NaN	NaN	NaN
76	48.5	0.76	0.72	0	0.05	70	70	7.25	37	0.04	25.88	15.77	20	3.8	NaN	NaN	NaN	NaN	NaN	NaN	NaN	NaN	NaN	NaN	NaN	NaN	NaN	NaN	NaN	NaN	NaN	NaN	NaN	NaN	NaN	NaN	NaN
76.25	51.2	0.73	0.69	0	0.04	70	70	7.25	37	0.04	25.58	15.77	20	3.8	NaN	NaN	NaN	NaN	NaN	NaN	NaN	NaN	NaN	NaN	NaN	NaN	NaN	NaN	NaN	NaN	NaN	NaN	NaN	NaN	NaN	NaN	NaN
76.5	49.5	0.72	0.68	0	0.04	70	70	7.24	37	0.04	25.43	15.77	20	3.8	NaN	NaN	NaN	NaN	NaN	NaN	NaN	NaN	NaN	NaN	NaN	NaN	NaN	NaN	NaN	NaN	NaN	NaN	NaN	NaN	NaN	NaN	NaN
76.75	47.8	0.79	0.74	0	0.05	70	70	7.25	37	0.04	26.22	15.77	20	3.8	NaN	NaN	NaN	NaN	NaN	NaN	NaN	NaN	NaN	NaN	NaN	NaN	NaN	NaN	NaN	NaN	NaN	NaN	NaN	NaN	NaN	NaN	NaN
77	50.5	0.8	0.75	0	0.05	70	70	7.25	37	0.04	26.28	15.77	20	3.8	NaN	NaN	NaN	NaN	NaN	NaN	NaN	NaN	NaN	NaN	NaN	NaN	NaN	NaN	NaN	NaN	NaN	NaN	NaN	NaN	NaN	NaN	NaN
77.25	50.7	0.79	0.74	0	0.05	70	70	7.24	37	0.04	26.25	15.77	20	3.8	NaN	NaN	NaN	NaN	NaN	NaN	NaN	NaN	NaN	NaN	NaN	NaN	NaN	NaN	NaN	NaN	NaN	NaN	NaN	NaN	NaN	NaN	NaN
77.5	51.2	0.74	0.69	0	0.04	70	70	7.25	37	0.04	25.72	15.77	20	3.8	NaN	NaN	NaN	NaN	NaN	NaN	NaN	NaN	NaN	NaN	NaN	NaN	NaN	NaN	NaN	NaN	NaN	NaN	NaN	NaN	NaN	NaN	NaN
77.75	47.8	0.8	0.74	0	0.05	70	70	7.25	37	0.04	26.23	15.77	20	3.8	NaN	NaN	NaN	NaN	NaN	NaN	NaN	NaN	NaN	NaN	NaN	NaN	NaN	NaN	NaN	NaN	NaN	NaN	NaN	NaN	NaN	NaN	NaN
78	49.1	0.85	0.79	0	0.06	70	70	7.25	37	0.04	26.85	15.77	20	3.8	NaN	NaN	NaN	NaN	NaN	NaN	NaN	NaN	NaN	NaN	NaN	NaN	NaN	NaN	NaN	NaN	NaN	NaN	NaN	NaN	NaN	NaN	NaN
78.25	52.1	0.8	0.74	0	0.05	70	70	7.24	37	0.04	26.21	15.77	20	3.8	NaN	NaN	NaN	NaN	NaN	NaN	NaN	NaN	NaN	NaN	NaN	NaN	NaN	NaN	NaN	NaN	NaN	NaN	NaN	NaN	NaN	NaN	NaN
78.5	49.7	0.78	0.73	0	0.05	70	70	7.24	37	0.04	26.05	15.77	20	3.8	NaN	NaN	NaN	NaN	NaN	NaN	NaN	NaN	NaN	NaN	NaN	NaN	NaN	NaN	NaN	NaN	NaN	NaN	NaN	NaN	NaN	NaN	NaN
78.75	49.5	0.83	0.77	0	0.06	70	70	7.25	37	0.04	26.43	15.77	20	3.8	NaN	NaN	NaN	NaN	NaN	NaN	NaN	NaN	NaN	NaN	NaN	NaN	NaN	NaN	NaN	NaN	NaN	NaN	NaN	NaN	NaN	NaN	NaN
79	50.7	0.78	0.73	0	0.05	70	70	7.25	37	0.04	26.2	15.77	20	3.8	NaN	NaN	NaN	NaN	NaN	NaN	NaN	NaN	NaN	NaN	NaN	NaN	NaN	NaN	NaN	NaN	NaN	NaN	NaN	NaN	NaN	NaN	NaN
79.25	50.1	0.78	0.73	0	0.05	70	70	7.25	37	0.04	26.04	15.77	20	3.8	NaN	NaN	NaN	NaN	NaN	NaN	NaN	NaN	NaN	NaN	NaN	NaN	NaN	NaN	NaN	NaN	NaN	NaN	NaN	NaN	NaN	NaN	NaN
79.5	49.5	0.79	0.74	0	0.05	70	70	7.24	37	0.04	26.26	15.77	20	3.8	NaN	NaN	NaN	NaN	NaN	NaN	NaN	NaN	NaN	NaN	NaN	NaN	NaN	NaN	NaN	NaN	NaN	NaN	NaN	NaN	NaN	NaN	NaN
79.75	50.5	0.79	0.74	0	0.05	70	70	7.25	37	0.04	26.19	15.77	20	3.8	NaN	NaN	NaN	NaN	NaN	NaN	NaN	NaN	NaN	NaN	NaN	NaN	NaN	NaN	NaN	NaN	NaN	NaN	NaN	NaN	NaN	NaN	NaN
80	50	0.78	0.73	0	0.05	70	70	7.25	37	0.04	26.09	15.77	20	3.8	NaN	NaN	NaN	NaN	NaN	NaN	NaN	NaN	NaN	NaN	NaN	NaN	NaN	NaN	NaN	NaN	NaN	NaN	NaN	NaN	NaN	NaN	NaN
80.25	49.7	0.78	0.73	0	0.05	70	70	7.25	37	0.04	26.12	15.77	20	3.8	NaN	NaN	NaN	NaN	NaN	NaN	NaN	NaN	NaN	NaN	NaN	NaN	NaN	NaN	NaN	NaN	NaN	NaN	NaN	NaN	NaN	NaN	NaN
80.5	49.9	0.77	0.72	0	0.05	70	70	7.25	37	0.04	26	15.77	20	3.8	NaN	NaN	NaN	NaN	NaN	NaN	NaN	NaN	NaN	NaN	NaN	NaN	NaN	NaN	NaN	NaN	NaN	NaN	NaN	NaN	NaN	NaN	NaN
80.75	48.7	0.79	0.74	0	0.05	70	70	7.24	37	0.04	26.18	15.77	20	3.8	NaN	NaN	NaN	NaN	NaN	NaN	NaN	NaN	NaN	NaN	NaN	NaN	NaN	NaN	NaN	NaN	NaN	NaN	NaN	NaN	NaN	NaN	NaN
81	48.7	0.85	0.78	0	0.06	70	70	7.25	37	0.04	26.8	15.77	20	3.8	NaN	NaN	NaN	NaN	NaN	NaN	NaN	NaN	NaN	NaN	NaN	NaN	NaN	NaN	NaN	NaN	NaN	NaN	NaN	NaN	NaN	NaN	NaN
81.25	50.1	0.86	0.79	0	0.06	70	70	7.25	37	0.04	26.82	15.77	20	3.8	NaN	NaN	NaN	NaN	NaN	NaN	NaN	NaN	NaN	NaN	NaN	NaN	NaN	NaN	NaN	NaN	NaN	NaN	NaN	NaN	NaN	NaN	NaN
81.5	51.1	0.78	0.73	0	0.05	70	70	7.24	37	0.04	26.33	15.77	20	3.8	NaN	NaN	NaN	NaN	NaN	NaN	NaN	NaN	NaN	NaN	NaN	NaN	NaN	NaN	NaN	NaN	NaN	NaN	NaN	NaN	NaN	NaN	NaN
81.75	50	0.79	0.74	0	0.05	70	70	7.25	37	0.04	26.2	15.77	20	3.8	NaN	NaN	NaN	NaN	NaN	NaN	NaN	NaN	NaN	NaN	NaN	NaN	NaN	NaN	NaN	NaN	NaN	NaN	NaN	NaN	NaN	NaN	NaN
82	48.8	0.83	0.77	0	0.06	70	70	7.25	37	0.04	26.65	15.77	20	3.8	NaN	NaN	NaN	NaN	NaN	NaN	NaN	NaN	NaN	NaN	NaN	NaN	NaN	NaN	NaN	NaN	NaN	NaN	NaN	NaN	NaN	NaN	NaN
82.25	50.2	0.84	0.78	0	0.06	70	70	7.24	37	0.04	26.68	15.77	20	3.8	NaN	NaN	NaN	NaN	NaN	NaN	NaN	NaN	NaN	NaN	NaN	NaN	NaN	NaN	NaN	NaN	NaN	NaN	NaN	NaN	NaN	NaN	NaN
82.5	50.1	0.82	0.76	0	0.06	70	70	7.25	37	0.04	26.63	15.77	20	3.8	NaN	NaN	NaN	NaN	NaN	NaN	NaN	NaN	NaN	NaN	NaN	NaN	NaN	NaN	NaN	NaN	NaN	NaN	NaN	NaN	NaN	NaN	NaN
82.75	48.4	0.88	0.81	0	0.07	70	70	7.24	37	0.04	27.18	15.77	20	3.8	NaN	NaN	NaN	NaN	NaN	NaN	NaN	NaN	NaN	NaN	NaN	NaN	NaN	NaN	NaN	NaN	NaN	NaN	NaN	NaN	NaN	NaN	NaN
83	50.2	0.88	0.81	0	0.07	70	70	7.25	37	0.04	27.17	15.77	20	3.8	NaN	NaN	NaN	NaN	NaN	NaN	NaN	NaN	NaN	NaN	NaN	NaN	NaN	NaN	NaN	NaN	NaN	NaN	NaN	NaN	NaN	NaN	NaN
83.25	50.7	0.88	0.81	0	0.07	70	70	7.25	37	0.04	27.1	15.77	20	3.8	NaN	NaN	NaN	NaN	NaN	NaN	NaN	NaN	NaN	NaN	NaN	NaN	NaN	NaN	NaN	NaN	NaN	NaN	NaN	NaN	NaN	NaN	NaN
83.5	51	0.85	0.78	0	0.06	70	70	7.25	37	0.04	26.78	15.77	20	3.8	NaN	NaN	NaN	NaN	NaN	NaN	NaN	NaN	NaN	NaN	NaN	NaN	NaN	NaN	NaN	NaN	NaN	NaN	NaN	NaN	NaN	NaN	NaN
83.75	49.9	0.86	0.79	0	0.06	70	70	7.25	37	0.04	26.89	15.77	20	3.8	NaN	NaN	NaN	NaN	NaN	NaN	NaN	NaN	NaN	NaN	NaN	NaN	NaN	NaN	NaN	NaN	NaN	NaN	NaN	NaN	NaN	NaN	NaN
84	51.2	0.83	0.77	0	0.06	70	70	7.25	37	0.04	26.56	15.77	20	3.8	NaN	NaN	NaN	NaN	NaN	NaN	NaN	NaN	NaN	NaN	NaN	NaN	NaN	NaN	NaN	NaN	NaN	NaN	NaN	NaN	NaN	NaN	NaN
84.25	50.1	0.81	0.75	0	0.06	70	70	7.25	37	0.04	26.39	15.77	20	3.8	NaN	NaN	NaN	NaN	NaN	NaN	NaN	NaN	NaN	NaN	NaN	NaN	NaN	NaN	NaN	NaN	NaN	NaN	NaN	NaN	NaN	NaN	NaN
84.5	47.2	0.89	0.83	0	0.07	70	70	7.24	37	0.04	27.15	15.77	20	3.8	NaN	NaN	NaN	NaN	NaN	NaN	NaN	NaN	NaN	NaN	NaN	NaN	NaN	NaN	NaN	NaN	NaN	NaN	NaN	NaN	NaN	NaN	NaN
84.75	49.1	0.94	0.86	0	0.08	70	70	7.25	37	0.04	27.68	15.77	20	3.8	NaN	NaN	NaN	NaN	NaN	NaN	NaN	NaN	NaN	NaN	NaN	NaN	NaN	NaN	NaN	NaN	NaN	NaN	NaN	NaN	NaN	NaN	NaN
85	51	0.89	0.82	0	0.07	70	70	7.25	37	0.04	27.44	15.77	20	3.8	NaN	NaN	NaN	NaN	NaN	NaN	NaN	NaN	NaN	NaN	NaN	NaN	NaN	NaN	NaN	NaN	NaN	NaN	NaN	NaN	NaN	NaN	NaN
85.25	51.5	0.85	0.79	0	0.06	70	70	7.24	37	0.04	26.83	15.77	20	3.8	NaN	NaN	NaN	NaN	NaN	NaN	NaN	NaN	NaN	NaN	NaN	NaN	NaN	NaN	NaN	NaN	NaN	NaN	NaN	NaN	NaN	NaN	NaN
85.5	49.2	0.83	0.77	0	0.06	70	70	7.25	37	0.04	26.87	15.77	20	3.8	NaN	NaN	NaN	NaN	NaN	NaN	NaN	NaN	NaN	NaN	NaN	NaN	NaN	NaN	NaN	NaN	NaN	NaN	NaN	NaN	NaN	NaN	NaN
85.75	49	0.91	0.83	0	0.07	70	70	7.25	37	0.04	27.37	15.77	20	3.8	NaN	NaN	NaN	NaN	NaN	NaN	NaN	NaN	NaN	NaN	NaN	NaN	NaN	NaN	NaN	NaN	NaN	NaN	NaN	NaN	NaN	NaN	NaN
86	47.1	1.01	0.91	0	0.09	70	70	7.25	37	0.03	28.25	15.77	20	3.8	NaN	NaN	NaN	NaN	NaN	NaN	NaN	NaN	NaN	NaN	NaN	NaN	NaN	NaN	NaN	NaN	NaN	NaN	NaN	NaN	NaN	NaN	NaN
86.25	50.8	0.99	0.9	0	0.09	70	70	7.25	37	0.03	28.3	15.77	20	3.8	NaN	NaN	NaN	NaN	NaN	NaN	NaN	NaN	NaN	NaN	NaN	NaN	NaN	NaN	NaN	NaN	NaN	NaN	NaN	NaN	NaN	NaN	NaN
86.5	52.8	0.9	0.82	0	0.07	70	70	7.24	37	0.04	27.33	15.77	20	3.8	NaN	NaN	NaN	NaN	NaN	NaN	NaN	NaN	NaN	NaN	NaN	NaN	NaN	NaN	NaN	NaN	NaN	NaN	NaN	NaN	NaN	NaN	NaN
86.75	49.9	0.86	0.8	0	0.07	70	70	7.24	37	0.04	27.14	15.77	20	3.8	NaN	NaN	NaN	NaN	NaN	NaN	NaN	NaN	NaN	NaN	NaN	NaN	NaN	NaN	NaN	NaN	NaN	NaN	NaN	NaN	NaN	NaN	NaN
87	50.5	0.88	0.81	0	0.07	70	70	7.24	37	0.04	27.18	15.77	20	3.8	NaN	NaN	NaN	NaN	NaN	NaN	NaN	NaN	NaN	NaN	NaN	NaN	NaN	NaN	NaN	NaN	NaN	NaN	NaN	NaN	NaN	NaN	NaN
87.25	48.8	0.91	0.84	0	0.07	70	70	7.25	37	0.04	27.46	15.77	20	3.8	NaN	NaN	NaN	NaN	NaN	NaN	NaN	NaN	NaN	NaN	NaN	NaN	NaN	NaN	NaN	NaN	NaN	NaN	NaN	NaN	NaN	NaN	NaN
87.5	49.1	0.97	0.88	0	0.09	70	70	7.25	37	0.04	28.08	15.77	20	3.8	NaN	NaN	NaN	NaN	NaN	NaN	NaN	NaN	NaN	NaN	NaN	NaN	NaN	NaN	NaN	NaN	NaN	NaN	NaN	NaN	NaN	NaN	NaN
87.75	51	0.95	0.86	0	0.08	70	70	7.25	37	0.04	27.85	15.77	20	3.8	NaN	NaN	NaN	NaN	NaN	NaN	NaN	NaN	NaN	NaN	NaN	NaN	NaN	NaN	NaN	NaN	NaN	NaN	NaN	NaN	NaN	NaN	NaN
88	51.6	0.9	0.82	0	0.07	70	70	7.25	37	0.04	27.32	15.77	20	3.8	NaN	NaN	NaN	NaN	NaN	NaN	NaN	NaN	NaN	NaN	NaN	NaN	NaN	NaN	NaN	NaN	NaN	NaN	NaN	NaN	NaN	NaN	NaN
88.25	50.6	0.86	0.8	0	0.07	70	70	7.25	37	0.04	27.01	15.77	20	3.8	NaN	NaN	NaN	NaN	NaN	NaN	NaN	NaN	NaN	NaN	NaN	NaN	NaN	NaN	NaN	NaN	NaN	NaN	NaN	NaN	NaN	NaN	NaN
88.5	48.2	0.9	0.83	0	0.07	70	70	7.25	37	0.04	27.39	15.77	20	3.8	NaN	NaN	NaN	NaN	NaN	NaN	NaN	NaN	NaN	NaN	NaN	NaN	NaN	NaN	NaN	NaN	NaN	NaN	NaN	NaN	NaN	NaN	NaN
88.75	48	0.99	0.89	0	0.09	70	70	7.25	37	0.03	28.25	15.77	20	3.8	NaN	NaN	NaN	NaN	NaN	NaN	NaN	NaN	NaN	NaN	NaN	NaN	NaN	NaN	NaN	NaN	NaN	NaN	NaN	NaN	NaN	NaN	NaN
89	50.5	0.99	0.9	0	0.09	70	70	7.25	37	0.03	28.3	15.77	20	3.8	NaN	NaN	NaN	NaN	NaN	NaN	NaN	NaN	NaN	NaN	NaN	NaN	NaN	NaN	NaN	NaN	NaN	NaN	NaN	NaN	NaN	NaN	NaN
89.25	51.1	0.94	0.86	0	0.08	70	70	7.25	37	0.04	27.76	15.77	20	3.8	NaN	NaN	NaN	NaN	NaN	NaN	NaN	NaN	NaN	NaN	NaN	NaN	NaN	NaN	NaN	NaN	NaN	NaN	NaN	NaN	NaN	NaN	NaN
89.5	50.2	0.93	0.85	0	0.08	70	70	7.25	37	0.04	27.69	15.77	20	3.8	NaN	NaN	NaN	NaN	NaN	NaN	NaN	NaN	NaN	NaN	NaN	NaN	NaN	NaN	NaN	NaN	NaN	NaN	NaN	NaN	NaN	NaN	NaN
89.75	50	0.93	0.85	0	0.08	70	70	7.25	37	0.04	27.65	15.77	20	3.8	NaN	NaN	NaN	NaN	NaN	NaN	NaN	NaN	NaN	NaN	NaN	NaN	NaN	NaN	NaN	NaN	NaN	NaN	NaN	NaN	NaN	NaN	NaN
90	49	0.96	0.88	0	0.09	70	70	7.25	37	0.04	27.99	15.77	20	3.8	NaN	NaN	NaN	NaN	NaN	NaN	NaN	NaN	NaN	NaN	NaN	NaN	NaN	NaN	NaN	NaN	NaN	NaN	NaN	NaN	NaN	NaN	NaN
90.25	50.4	0.95	0.86	0	0.08	70	70	7.25	37	0.04	27.89	15.77	20	3.8	NaN	NaN	NaN	NaN	NaN	NaN	NaN	NaN	NaN	NaN	NaN	NaN	NaN	NaN	NaN	NaN	NaN	NaN	NaN	NaN	NaN	NaN	NaN
90.5	49.1	0.97	0.88	0	0.09	70	70	7.25	37	0.04	28.15	15.77	20	3.8	NaN	NaN	NaN	NaN	NaN	NaN	NaN	NaN	NaN	NaN	NaN	NaN	NaN	NaN	NaN	NaN	NaN	NaN	NaN	NaN	NaN	NaN	NaN
90.75	49.9	0.98	0.89	0	0.09	70	70	7.25	37	0.04	28.23	15.77	20	3.8	NaN	NaN	NaN	NaN	NaN	NaN	NaN	NaN	NaN	NaN	NaN	NaN	NaN	NaN	NaN	NaN	NaN	NaN	NaN	NaN	NaN	NaN	NaN
91	49.3	1.02	0.92	0	0.1	70	70	7.25	37	0.03	28.4	15.77	20	3.8	NaN	NaN	NaN	NaN	NaN	NaN	NaN	NaN	NaN	NaN	NaN	NaN	NaN	NaN	NaN	NaN	NaN	NaN	NaN	NaN	NaN	NaN	NaN
91.25	50.4	0.99	0.9	0	0.09	70	70	7.25	37	0.03	28.36	15.77	20	3.8	NaN	NaN	NaN	NaN	NaN	NaN	NaN	NaN	NaN	NaN	NaN	NaN	NaN	NaN	NaN	NaN	NaN	NaN	NaN	NaN	NaN	NaN	NaN
91.5	51.2	0.95	0.86	0	0.08	70	70	7.24	37	0.04	27.96	15.77	20	3.8	NaN	NaN	NaN	NaN	NaN	NaN	NaN	NaN	NaN	NaN	NaN	NaN	NaN	NaN	NaN	NaN	NaN	NaN	NaN	NaN	NaN	NaN	NaN
91.75	49.3	0.99	0.9	0	0.09	70	70	7.24	37	0.03	28.25	15.77	20	3.8	NaN	NaN	NaN	NaN	NaN	NaN	NaN	NaN	NaN	NaN	NaN	NaN	NaN	NaN	NaN	NaN	NaN	NaN	NaN	NaN	NaN	NaN	NaN
92	49.1	1.01	0.91	0	0.1	70	70	7.24	37	0.03	28.53	15.77	20	3.8	NaN	NaN	NaN	NaN	NaN	NaN	NaN	NaN	NaN	NaN	NaN	NaN	NaN	NaN	NaN	NaN	NaN	NaN	NaN	NaN	NaN	NaN	NaN
92.25	49.8	1.02	0.92	0	0.1	70	70	7.24	37	0.03	28.65	15.77	20	3.8	NaN	NaN	NaN	NaN	NaN	NaN	NaN	NaN	NaN	NaN	NaN	NaN	NaN	NaN	NaN	NaN	NaN	NaN	NaN	NaN	NaN	NaN	NaN
92.5	49.2	1.02	0.91	0	0.1	70	70	7.25	37	0.03	28.75	15.77	20	3.8	NaN	NaN	NaN	NaN	NaN	NaN	NaN	NaN	NaN	NaN	NaN	NaN	NaN	NaN	NaN	NaN	NaN	NaN	NaN	NaN	NaN	NaN	NaN
92.75	49.7	1.06	0.95	0	0.11	70	70	7.25	37	0.03	28.97	15.77	20	3.8	NaN	NaN	NaN	NaN	NaN	NaN	NaN	NaN	NaN	NaN	NaN	NaN	NaN	NaN	NaN	NaN	NaN	NaN	NaN	NaN	NaN	NaN	NaN
93	51.1	1.02	0.92	0	0.1	70	70	7.25	37	0.03	28.66	15.77	20	3.8	NaN	NaN	NaN	NaN	NaN	NaN	NaN	NaN	NaN	NaN	NaN	NaN	NaN	NaN	NaN	NaN	NaN	NaN	NaN	NaN	NaN	NaN	NaN
93.25	49.7	1.03	0.93	0	0.1	70	70	7.25	37	0.03	28.63	15.77	20	3.8	NaN	NaN	NaN	NaN	NaN	NaN	NaN	NaN	NaN	NaN	NaN	NaN	NaN	NaN	NaN	NaN	NaN	NaN	NaN	NaN	NaN	NaN	NaN
93.5	48.3	1.06	0.95	0	0.11	70	70	7.24	37	0.03	29	15.77	20	3.8	NaN	NaN	NaN	NaN	NaN	NaN	NaN	NaN	NaN	NaN	NaN	NaN	NaN	NaN	NaN	NaN	NaN	NaN	NaN	NaN	NaN	NaN	NaN
93.75	49.1	1.12	0.99	0	0.12	70	70	7.25	37	0.03	29.65	15.77	20	3.8	NaN	NaN	NaN	NaN	NaN	NaN	NaN	NaN	NaN	NaN	NaN	NaN	NaN	NaN	NaN	NaN	NaN	NaN	NaN	NaN	NaN	NaN	NaN
94	51.7	1.08	0.97	0	0.11	70	70	7.25	37	0.03	29.29	15.77	20	3.8	NaN	NaN	NaN	NaN	NaN	NaN	NaN	NaN	NaN	NaN	NaN	NaN	NaN	NaN	NaN	NaN	NaN	NaN	NaN	NaN	NaN	NaN	NaN
94.25	52.2	1	0.91	0	0.09	70	70	7.25	37	0.03	28.42	15.77	20	3.8	NaN	NaN	NaN	NaN	NaN	NaN	NaN	NaN	NaN	NaN	NaN	NaN	NaN	NaN	NaN	NaN	NaN	NaN	NaN	NaN	NaN	NaN	NaN
94.5	49.7	1.01	0.92	0	0.09	70	70	7.25	37	0.03	28.28	15.77	20	3.8	NaN	NaN	NaN	NaN	NaN	NaN	NaN	NaN	NaN	NaN	NaN	NaN	NaN	NaN	NaN	NaN	NaN	NaN	NaN	NaN	NaN	NaN	NaN
94.75	47.7	1.06	0.96	0	0.11	70	70	7.25	37	0.03	29.04	15.77	20	3.8	NaN	NaN	NaN	NaN	NaN	NaN	NaN	NaN	NaN	NaN	NaN	NaN	NaN	NaN	NaN	NaN	NaN	NaN	NaN	NaN	NaN	NaN	NaN
95	48.7	1.1	0.98	0	0.12	70	70	7.25	37	0.03	29.67	15.77	20	3.8	NaN	NaN	NaN	NaN	NaN	NaN	NaN	NaN	NaN	NaN	NaN	NaN	NaN	NaN	NaN	NaN	NaN	NaN	NaN	NaN	NaN	NaN	NaN
95.25	51	1.12	1	0	0.12	70	70	7.25	37	0.03	29.39	15.77	20	3.8	NaN	NaN	NaN	NaN	NaN	NaN	NaN	NaN	NaN	NaN	NaN	NaN	NaN	NaN	NaN	NaN	NaN	NaN	NaN	NaN	NaN	NaN	NaN
95.5	51.2	1.04	0.94	0	0.11	70	70	7.25	37	0.03	28.98	15.77	20	3.8	NaN	NaN	NaN	NaN	NaN	NaN	NaN	NaN	NaN	NaN	NaN	NaN	NaN	NaN	NaN	NaN	NaN	NaN	NaN	NaN	NaN	NaN	NaN
95.75	48.3	1.09	0.97	0	0.12	70	70	7.25	37	0.03	29.33	15.77	20	3.8	NaN	NaN	NaN	NaN	NaN	NaN	NaN	NaN	NaN	NaN	NaN	NaN	NaN	NaN	NaN	NaN	NaN	NaN	NaN	NaN	NaN	NaN	NaN
96	48.6	1.16	1.03	0	0.13	70	70	7.25	37	0.03	30.09	15.77	20	3.8	660	0	0	NaN	NaN	NaN	1.7	0.0708333	NaN	1241250	1.36959e-06	4.54757	387	3.7	41.44	2.26635	42.3834	0.0163637	NaN	NaN	NaN	NaN	NaN
96.25	51.2	1.13	1	0	0.13	70	70	7.25	37	0.03	29.8	15.77	20	3.8	NaN	NaN	NaN	NaN	NaN	NaN	NaN	NaN	NaN	NaN	NaN	NaN	NaN	NaN	NaN	NaN	NaN	NaN	NaN	NaN	NaN	NaN	NaN
96.5	51.3	1.08	0.96	0	0.12	70	70	7.26	37	0.03	29.31	15.77	20	3.8	NaN	NaN	NaN	NaN	NaN	NaN	NaN	NaN	NaN	NaN	NaN	NaN	NaN	NaN	NaN	NaN	NaN	NaN	NaN	NaN	NaN	NaN	NaN
96.75	50.1	1.07	0.96	0	0.11	70	70	7.26	37	0.03	29.19	15.77	20	3.8	NaN	NaN	NaN	1.386	1.386	2.1	NaN	NaN	NaN	NaN	NaN	NaN	NaN	NaN	NaN	NaN	NaN	NaN	NaN	NaN	NaN	NaN	NaN
97	48.5	1.11	0.98	0	0.12	70	70	7.27	37	0.03	29.55	15.77	20	3.8	NaN	NaN	NaN	NaN	NaN	NaN	NaN	NaN	NaN	NaN	NaN	NaN	NaN	NaN	NaN	NaN	NaN	NaN	NaN	NaN	NaN	NaN	NaN
97.25	48.1	1.16	1.03	0	0.14	70	70	7.28	37	0.03	30.22	15.77	20	3.8	NaN	NaN	NaN	NaN	NaN	NaN	NaN	NaN	NaN	NaN	NaN	NaN	NaN	NaN	NaN	NaN	NaN	NaN	NaN	NaN	NaN	NaN	NaN
97.5	46.9	1.26	1.1	0	0.16	70	70	7.29	37	0.03	31.15	15.77	20	3.8	NaN	NaN	NaN	NaN	NaN	NaN	NaN	NaN	NaN	NaN	NaN	NaN	NaN	NaN	NaN	NaN	NaN	NaN	NaN	NaN	NaN	NaN	NaN
97.75	48.7	1.32	1.14	0	0.18	70	70	7.31	37	0.03	31.75	15.77	20	3.8	NaN	NaN	NaN	NaN	NaN	NaN	NaN	NaN	NaN	NaN	NaN	NaN	NaN	NaN	NaN	NaN	NaN	NaN	NaN	NaN	NaN	NaN	NaN
98	48	1.37	1.17	0	0.2	70	70	7.32	37	0.03	32.44	15.77	20	3.8	NaN	NaN	NaN	NaN	NaN	NaN	NaN	NaN	NaN	NaN	NaN	NaN	NaN	NaN	NaN	NaN	NaN	NaN	NaN	NaN	NaN	NaN	NaN
98.25	52.1	1.34	1.15	0	0.19	70	70	7.35	37	0.03	31.95	15.77	20	3.8	NaN	NaN	NaN	NaN	NaN	NaN	NaN	NaN	NaN	NaN	NaN	NaN	NaN	NaN	NaN	NaN	NaN	NaN	NaN	NaN	NaN	NaN	NaN
98.5	52.2	1.26	1.09	0	0.16	70	70	7.36	37	0.38	31.19	15.77	20	3.8	NaN	NaN	NaN	NaN	NaN	NaN	NaN	NaN	NaN	NaN	NaN	NaN	NaN	NaN	NaN	NaN	NaN	NaN	NaN	NaN	NaN	NaN	NaN
98.75	52	1.2	1.04	0.01	0.15	70	70	7.38	36.9	0.93	30.5	15.77	20	3.8	NaN	NaN	NaN	NaN	NaN	NaN	NaN	NaN	NaN	NaN	NaN	NaN	NaN	NaN	NaN	NaN	NaN	NaN	NaN	NaN	NaN	NaN	NaN
99	81.4	0.54	0.49	0.01	0.03	70	70	7.48	33.2	4.62	23.41	15.77	20	3.8	NaN	NaN	NaN	NaN	NaN	NaN	NaN	NaN	NaN	NaN	NaN	NaN	NaN	NaN	NaN	NaN	NaN	NaN	NaN	NaN	NaN	NaN	NaN
99.25	74.6	0.3	0.28	0.01	0	70	70	7.45	39.2	4	21	15.77	20	3.8	NaN	NaN	NaN	NaN	NaN	NaN	NaN	NaN	NaN	NaN	NaN	NaN	NaN	NaN	NaN	NaN	NaN	NaN	NaN	NaN	NaN	NaN	NaN
99.5	44.5	0.38	0.35	0.01	0.01	70	70	7.42	35.9	3.75	21.81	15.77	20	3.8	NaN	NaN	NaN	NaN	NaN	NaN	NaN	NaN	NaN	NaN	NaN	NaN	NaN	NaN	NaN	NaN	NaN	NaN	NaN	NaN	NaN	NaN	NaN
99.75	34.2	0.88	0.78	0.03	0.08	70	70	7.39	37.1	3.2	27.15	15.77	20	3.8	NaN	NaN	NaN	NaN	NaN	NaN	NaN	NaN	NaN	NaN	NaN	NaN	NaN	NaN	NaN	NaN	NaN	NaN	NaN	NaN	NaN	NaN	NaN
100	37.6	1.34	1.15	0	0.18	70	70	7.35	38.1	0.03	31.91	15.77	20	3.8	NaN	NaN	NaN	NaN	NaN	NaN	NaN	NaN	NaN	NaN	NaN	NaN	NaN	NaN	NaN	NaN	NaN	NaN	NaN	NaN	NaN	NaN	NaN
100.25	51.7	1.39	1.18	0	0.2	70	70	7.36	36.2	0.28	32.42	15.77	20	3.8	NaN	NaN	NaN	NaN	NaN	NaN	NaN	NaN	NaN	NaN	NaN	NaN	NaN	NaN	NaN	NaN	NaN	NaN	NaN	NaN	NaN	NaN	NaN
100.5	60.8	1.03	0.93	0	0.1	70	70	7.36	37.5	0.39	28.74	15.77	20	3.8	NaN	NaN	NaN	NaN	NaN	NaN	NaN	NaN	NaN	NaN	NaN	NaN	NaN	NaN	NaN	NaN	NaN	NaN	NaN	NaN	NaN	NaN	NaN
100.75	54.1	0.83	0.77	0	0.06	70	70	7.36	37.4	0.35	26.6	15.77	20	3.8	NaN	NaN	NaN	NaN	NaN	NaN	NaN	NaN	NaN	NaN	NaN	NaN	NaN	NaN	NaN	NaN	NaN	NaN	NaN	NaN	NaN	NaN	NaN
101	46.7	0.9	0.82	0	0.07	70	70	7.35	36.5	0.33	27.38	15.77	20	3.8	NaN	NaN	NaN	NaN	NaN	NaN	NaN	NaN	NaN	NaN	NaN	NaN	NaN	NaN	NaN	NaN	NaN	NaN	NaN	NaN	NaN	NaN	NaN
101.25	45.5	1.08	0.97	0	0.11	70	70	7.35	37	0.03	29.05	15.77	20	3.8	NaN	NaN	NaN	NaN	NaN	NaN	NaN	NaN	NaN	NaN	NaN	NaN	NaN	NaN	NaN	NaN	NaN	NaN	NaN	NaN	NaN	NaN	NaN
101.5	45.9	1.2	1.05	0	0.15	70	70	7.35	37.3	0.03	30.6	15.77	20	3.8	NaN	NaN	NaN	NaN	NaN	NaN	NaN	NaN	NaN	NaN	NaN	NaN	NaN	NaN	NaN	NaN	NaN	NaN	NaN	NaN	NaN	NaN	NaN
101.75	51.1	1.22	1.06	0	0.15	70	70	7.36	36.9	0.23	30.75	15.77	20	3.8	NaN	NaN	NaN	NaN	NaN	NaN	NaN	NaN	NaN	NaN	NaN	NaN	NaN	NaN	NaN	NaN	NaN	NaN	NaN	NaN	NaN	NaN	NaN
102	55.6	1.07	0.96	0.01	0.11	70	70	7.37	36.8	0.55	28.94	15.77	20	3.8	NaN	NaN	NaN	NaN	NaN	NaN	NaN	NaN	NaN	NaN	NaN	NaN	NaN	NaN	NaN	NaN	NaN	NaN	NaN	NaN	NaN	NaN	NaN
102.25	51.5	0.95	0.86	0.01	0.09	70	70	7.36	37	0.54	27.98	15.77	20	3.8	NaN	NaN	NaN	NaN	NaN	NaN	NaN	NaN	NaN	NaN	NaN	NaN	NaN	NaN	NaN	NaN	NaN	NaN	NaN	NaN	NaN	NaN	NaN
102.5	44.9	1.13	1	0	0.13	70	70	7.35	37.1	0.03	29.79	15.77	20	3.8	NaN	NaN	NaN	NaN	NaN	NaN	NaN	NaN	NaN	NaN	NaN	NaN	NaN	NaN	NaN	NaN	NaN	NaN	NaN	NaN	NaN	NaN	NaN
102.75	48.2	1.22	1.07	0	0.15	70	70	7.35	37	0.05	30.78	15.77	20	3.8	NaN	NaN	NaN	NaN	NaN	NaN	NaN	NaN	NaN	NaN	NaN	NaN	NaN	NaN	NaN	NaN	NaN	NaN	NaN	NaN	NaN	NaN	NaN
103	52.7	1.16	1.03	0	0.14	70	70	7.36	36.9	0.2	30.14	15.77	20	3.8	NaN	NaN	NaN	NaN	NaN	NaN	NaN	NaN	NaN	NaN	NaN	NaN	NaN	NaN	NaN	NaN	NaN	NaN	NaN	NaN	NaN	NaN	NaN
103.25	50.9	1.09	0.97	0	0.12	70	70	7.36	37	0.29	29.49	15.77	20	3.8	NaN	NaN	NaN	NaN	NaN	NaN	NaN	NaN	NaN	NaN	NaN	NaN	NaN	NaN	NaN	NaN	NaN	NaN	NaN	NaN	NaN	NaN	NaN
103.5	49.3	1.1	0.98	0	0.12	70	70	7.36	37.1	0.36	29.57	15.77	20	3.8	NaN	NaN	NaN	NaN	NaN	NaN	NaN	NaN	NaN	NaN	NaN	NaN	NaN	NaN	NaN	NaN	NaN	NaN	NaN	NaN	NaN	NaN	NaN
103.75	49.3	1.13	1	0	0.13	70	70	7.36	37	0.39	29.73	15.77	20	3.8	NaN	NaN	NaN	NaN	NaN	NaN	NaN	NaN	NaN	NaN	NaN	NaN	NaN	NaN	NaN	NaN	NaN	NaN	NaN	NaN	NaN	NaN	NaN
104	50.1	1.13	1.01	0	0.13	70	70	7.35	37	0.29	29.8	15.77	20	3.8	NaN	NaN	NaN	NaN	NaN	NaN	NaN	NaN	NaN	NaN	NaN	NaN	NaN	NaN	NaN	NaN	NaN	NaN	NaN	NaN	NaN	NaN	NaN
104.25	49.8	1.14	1.01	0	0.13	70	70	7.35	37	0.03	29.9	15.77	20	3.8	NaN	NaN	NaN	NaN	NaN	NaN	NaN	NaN	NaN	NaN	NaN	NaN	NaN	NaN	NaN	NaN	NaN	NaN	NaN	NaN	NaN	NaN	NaN
104.5	46.8	1.27	1.11	0	0.16	70	70	7.34	37	0.03	31.16	15.77	20	3.8	NaN	NaN	NaN	NaN	NaN	NaN	NaN	NaN	NaN	NaN	NaN	NaN	NaN	NaN	NaN	NaN	NaN	NaN	NaN	NaN	NaN	NaN	NaN
104.75	51.3	1.23	1.08	0	0.15	70	70	7.35	37	0.03	30.84	15.77	20	3.8	NaN	NaN	NaN	NaN	NaN	NaN	NaN	NaN	NaN	NaN	NaN	NaN	NaN	NaN	NaN	NaN	NaN	NaN	NaN	NaN	NaN	NaN	NaN
105	51.2	1.2	1.06	0	0.15	70	70	7.35	37.1	0.03	30.55	15.77	20	3.8	NaN	NaN	NaN	NaN	NaN	NaN	NaN	NaN	NaN	NaN	NaN	NaN	NaN	NaN	NaN	NaN	NaN	NaN	NaN	NaN	NaN	NaN	NaN
105.25	52.2	1.12	1	0	0.13	70	70	7.35	37	0.03	29.75	15.77	20	3.8	NaN	NaN	NaN	NaN	NaN	NaN	NaN	NaN	NaN	NaN	NaN	NaN	NaN	NaN	NaN	NaN	NaN	NaN	NaN	NaN	NaN	NaN	NaN
105.5	51.3	1.09	0.97	0	0.11	70	70	7.34	37	0.03	29.3	15.77	20	3.8	NaN	NaN	NaN	NaN	NaN	NaN	NaN	NaN	NaN	NaN	NaN	NaN	NaN	NaN	NaN	NaN	NaN	NaN	NaN	NaN	NaN	NaN	NaN
105.75	48.4	1.13	1	0	0.13	70	70	7.34	37	0.03	29.76	15.77	20	3.8	NaN	NaN	NaN	NaN	NaN	NaN	NaN	NaN	NaN	NaN	NaN	NaN	NaN	NaN	NaN	NaN	NaN	NaN	NaN	NaN	NaN	NaN	NaN
106	49.1	1.16	1.03	0	0.14	70	70	7.34	37	0.03	30.19	15.77	20	3.8	NaN	NaN	NaN	NaN	NaN	NaN	NaN	NaN	NaN	NaN	NaN	NaN	NaN	NaN	NaN	NaN	NaN	NaN	NaN	NaN	NaN	NaN	NaN
106.25	49.2	1.2	1.05	0	0.14	70	70	7.33	37	0.03	30.48	15.77	20	3.8	NaN	NaN	NaN	NaN	NaN	NaN	NaN	NaN	NaN	NaN	NaN	NaN	NaN	NaN	NaN	NaN	NaN	NaN	NaN	NaN	NaN	NaN	NaN
106.5	50.4	1.17	1.04	0	0.14	70	70	7.33	37	0.03	30.3	15.77	20	3.8	NaN	NaN	NaN	NaN	NaN	NaN	NaN	NaN	NaN	NaN	NaN	NaN	NaN	NaN	NaN	NaN	NaN	NaN	NaN	NaN	NaN	NaN	NaN
106.75	47.1	1.28	1.11	0	0.17	70	70	7.32	37	0.03	31.4	15.77	20	3.8	NaN	NaN	NaN	NaN	NaN	NaN	NaN	NaN	NaN	NaN	NaN	NaN	NaN	NaN	NaN	NaN	NaN	NaN	NaN	NaN	NaN	NaN	NaN
107	50.9	1.29	1.12	0	0.17	70	70	7.32	37	0.03	31.43	15.77	20	3.8	NaN	NaN	NaN	NaN	NaN	NaN	NaN	NaN	NaN	NaN	NaN	NaN	NaN	NaN	NaN	NaN	NaN	NaN	NaN	NaN	NaN	NaN	NaN
107.25	54.6	1.18	1.04	0	0.13	70	70	7.32	37.1	0.03	30	15.77	20	3.8	NaN	NaN	NaN	NaN	NaN	NaN	NaN	NaN	NaN	NaN	NaN	NaN	NaN	NaN	NaN	NaN	NaN	NaN	NaN	NaN	NaN	NaN	NaN
107.5	49.8	1.12	1	0	0.12	70	70	7.31	37	0.03	29.68	15.77	20	3.8	NaN	NaN	NaN	NaN	NaN	NaN	NaN	NaN	NaN	NaN	NaN	NaN	NaN	NaN	NaN	NaN	NaN	NaN	NaN	NaN	NaN	NaN	NaN
107.75	48.4	1.18	1.04	0	0.14	70	70	7.31	37	0.03	30.38	15.77	20	3.8	NaN	NaN	NaN	NaN	NaN	NaN	NaN	NaN	NaN	NaN	NaN	NaN	NaN	NaN	NaN	NaN	NaN	NaN	NaN	NaN	NaN	NaN	NaN
108	50.6	1.17	1.03	0	0.13	70	70	7.3	37	0.03	30.19	15.77	20	3.8	NaN	NaN	NaN	NaN	NaN	NaN	NaN	NaN	NaN	NaN	NaN	NaN	NaN	NaN	NaN	NaN	NaN	NaN	NaN	NaN	NaN	NaN	NaN
108.25	50.2	1.14	1.01	0	0.13	70	70	7.3	37	0.03	29.94	15.77	20	3.8	NaN	NaN	NaN	NaN	NaN	NaN	NaN	NaN	NaN	NaN	NaN	NaN	NaN	NaN	NaN	NaN	NaN	NaN	NaN	NaN	NaN	NaN	NaN
108.5	47	1.21	1.06	0	0.15	70	70	7.29	37	0.03	30.7	15.77	20	3.8	NaN	NaN	NaN	NaN	NaN	NaN	NaN	NaN	NaN	NaN	NaN	NaN	NaN	NaN	NaN	NaN	NaN	NaN	NaN	NaN	NaN	NaN	NaN
108.75	50	1.24	1.09	0	0.16	70	70	7.29	37	0.03	30.96	15.77	20	3.8	NaN	NaN	NaN	NaN	NaN	NaN	NaN	NaN	NaN	NaN	NaN	NaN	NaN	NaN	NaN	NaN	NaN	NaN	NaN	NaN	NaN	NaN	NaN
109	52.2	1.18	1.04	0	0.14	70	70	7.28	37	0.03	30.33	15.77	20	3.8	NaN	NaN	NaN	NaN	NaN	NaN	NaN	NaN	NaN	NaN	NaN	NaN	NaN	NaN	NaN	NaN	NaN	NaN	NaN	NaN	NaN	NaN	NaN
109.25	49.6	1.18	1.04	0	0.14	70	70	7.28	37	0.03	30.25	15.77	20	3.8	NaN	NaN	NaN	NaN	NaN	NaN	NaN	NaN	NaN	NaN	NaN	NaN	NaN	NaN	NaN	NaN	NaN	NaN	NaN	NaN	NaN	NaN	NaN
109.5	47.3	1.23	1.08	0	0.15	70	70	7.27	37	0.03	30.89	15.77	20	3.8	NaN	NaN	NaN	NaN	NaN	NaN	NaN	NaN	NaN	NaN	NaN	NaN	NaN	NaN	NaN	NaN	NaN	NaN	NaN	NaN	NaN	NaN	NaN
109.75	48.5	1.29	1.12	0	0.18	70	70	7.26	37	0.03	31.62	15.77	20	3.8	NaN	NaN	NaN	NaN	NaN	NaN	NaN	NaN	NaN	NaN	NaN	NaN	NaN	NaN	NaN	NaN	NaN	NaN	NaN	NaN	NaN	NaN	NaN
110	52.1	1.24	1.08	0	0.16	70	70	7.26	37.1	0.03	30.95	15.77	20	3.8	NaN	NaN	NaN	NaN	NaN	NaN	NaN	NaN	NaN	NaN	NaN	NaN	NaN	NaN	NaN	NaN	NaN	NaN	NaN	NaN	NaN	NaN	NaN
110.25	52.5	1.13	1	0	0.13	70	70	7.26	37	0.03	29.98	15.77	20	3.8	NaN	NaN	NaN	NaN	NaN	NaN	NaN	NaN	NaN	NaN	NaN	NaN	NaN	NaN	NaN	NaN	NaN	NaN	NaN	NaN	NaN	NaN	NaN
110.5	48.1	1.17	1.03	0	0.14	70	70	7.25	36.9	0.03	30.16	15.77	20	3.8	NaN	NaN	NaN	NaN	NaN	NaN	NaN	NaN	NaN	NaN	NaN	NaN	NaN	NaN	NaN	NaN	NaN	NaN	NaN	NaN	NaN	NaN	NaN
110.75	47.7	1.26	1.1	0	0.16	70	70	7.25	37	0.03	31.15	15.77	20	3.8	NaN	NaN	NaN	NaN	NaN	NaN	NaN	NaN	NaN	NaN	NaN	NaN	NaN	NaN	NaN	NaN	NaN	NaN	NaN	NaN	NaN	NaN	NaN
111	50.5	1.26	1.1	0	0.16	70	70	7.25	37	0.03	31.14	15.77	20	3.8	NaN	NaN	NaN	NaN	NaN	NaN	NaN	NaN	NaN	NaN	NaN	NaN	NaN	NaN	NaN	NaN	NaN	NaN	NaN	NaN	NaN	NaN	NaN
111.25	51.8	1.2	1.06	0	0.15	70	70	7.25	37	0.03	30.54	15.77	20	3.8	NaN	NaN	NaN	NaN	NaN	NaN	NaN	NaN	NaN	NaN	NaN	NaN	NaN	NaN	NaN	NaN	NaN	NaN	NaN	NaN	NaN	NaN	NaN
111.5	51.4	1.15	1.01	0	0.13	70	70	7.24	37	0.03	30.08	15.77	20	3.8	NaN	NaN	NaN	NaN	NaN	NaN	NaN	NaN	NaN	NaN	NaN	NaN	NaN	NaN	NaN	NaN	NaN	NaN	NaN	NaN	NaN	NaN	NaN
111.75	46.4	1.27	1.1	0	0.16	70	70	7.24	37	0.03	31.2	15.77	20	3.8	NaN	NaN	NaN	NaN	NaN	NaN	NaN	NaN	NaN	NaN	NaN	NaN	NaN	NaN	NaN	NaN	NaN	NaN	NaN	NaN	NaN	NaN	NaN
112	48.5	1.35	1.16	0	0.19	70	70	7.25	37	0.03	32.06	15.77	20	3.8	NaN	NaN	NaN	NaN	NaN	NaN	NaN	NaN	NaN	NaN	NaN	NaN	NaN	NaN	NaN	NaN	NaN	NaN	NaN	NaN	NaN	NaN	NaN
112.25	52.8	1.28	1.11	0	0.16	70	70	7.25	37.1	0.03	31.29	15.77	20	3.8	NaN	NaN	NaN	NaN	NaN	NaN	NaN	NaN	NaN	NaN	NaN	NaN	NaN	NaN	NaN	NaN	NaN	NaN	NaN	NaN	NaN	NaN	NaN
112.5	49.4	1.25	1.09	0	0.16	70	70	7.25	36.9	0.03	31.01	15.77	20	3.8	NaN	NaN	NaN	NaN	NaN	NaN	NaN	NaN	NaN	NaN	NaN	NaN	NaN	NaN	NaN	NaN	NaN	NaN	NaN	NaN	NaN	NaN	NaN
112.75	50.2	1.26	1.1	0	0.16	70	70	7.25	37	0.03	31.23	15.77	20	3.8	NaN	NaN	NaN	NaN	NaN	NaN	NaN	NaN	NaN	NaN	NaN	NaN	NaN	NaN	NaN	NaN	NaN	NaN	NaN	NaN	NaN	NaN	NaN
113	51.1	1.23	1.08	0	0.15	70	70	7.25	37	0.03	30.83	15.77	20	3.8	NaN	NaN	NaN	NaN	NaN	NaN	NaN	NaN	NaN	NaN	NaN	NaN	NaN	NaN	NaN	NaN	NaN	NaN	NaN	NaN	NaN	NaN	NaN
113.25	49	1.26	1.1	0	0.16	70	70	7.25	37.1	0.03	31.19	15.77	20	3.8	NaN	NaN	NaN	NaN	NaN	NaN	NaN	NaN	NaN	NaN	NaN	NaN	NaN	NaN	NaN	NaN	NaN	NaN	NaN	NaN	NaN	NaN	NaN
113.5	50.7	1.24	1.08	0	0.16	70	70	7.25	37	0.03	30.97	15.77	20	3.8	NaN	NaN	NaN	NaN	NaN	NaN	NaN	NaN	NaN	NaN	NaN	NaN	NaN	NaN	NaN	NaN	NaN	NaN	NaN	NaN	NaN	NaN	NaN
113.75	48	1.29	1.12	0	0.17	70	70	7.25	37	0.03	31.51	15.77	20	3.8	NaN	NaN	NaN	NaN	NaN	NaN	NaN	NaN	NaN	NaN	NaN	NaN	NaN	NaN	NaN	NaN	NaN	NaN	NaN	NaN	NaN	NaN	NaN
114	48	1.35	1.16	0	0.19	70	70	7.24	37	0.03	32.08	15.77	20	3.8	NaN	NaN	NaN	NaN	NaN	NaN	NaN	NaN	NaN	NaN	NaN	NaN	NaN	NaN	NaN	NaN	NaN	NaN	NaN	NaN	NaN	NaN	NaN
114.25	51.7	1.35	1.16	0	0.19	70	70	7.25	37	0.03	32.04	15.77	20	3.8	NaN	NaN	NaN	NaN	NaN	NaN	NaN	NaN	NaN	NaN	NaN	NaN	NaN	NaN	NaN	NaN	NaN	NaN	NaN	NaN	NaN	NaN	NaN
114.5	51.3	1.29	1.12	0	0.17	70	70	7.25	37	0.03	31.37	15.77	20	3.8	NaN	NaN	NaN	NaN	NaN	NaN	NaN	NaN	NaN	NaN	NaN	NaN	NaN	NaN	NaN	NaN	NaN	NaN	NaN	NaN	NaN	NaN	NaN
114.75	48	1.32	1.14	0	0.18	70	70	7.24	37	0.03	31.93	15.77	20	3.8	NaN	NaN	NaN	NaN	NaN	NaN	NaN	NaN	NaN	NaN	NaN	NaN	NaN	NaN	NaN	NaN	NaN	NaN	NaN	NaN	NaN	NaN	NaN
115	49	1.37	1.17	0	0.2	70	70	7.25	37	0.03	32.33	15.77	20	3.8	NaN	NaN	NaN	NaN	NaN	NaN	NaN	NaN	NaN	NaN	NaN	NaN	NaN	NaN	NaN	NaN	NaN	NaN	NaN	NaN	NaN	NaN	NaN
115.25	52.5	1.3	1.12	0	0.18	70	70	7.25	37	0.03	31.62	15.77	20	3.8	NaN	NaN	NaN	NaN	NaN	NaN	NaN	NaN	NaN	NaN	NaN	NaN	NaN	NaN	NaN	NaN	NaN	NaN	NaN	NaN	NaN	NaN	NaN
115.5	50.7	1.25	1.09	0	0.16	70	70	7.25	37	0.03	31.04	15.77	20	3.8	NaN	NaN	NaN	NaN	NaN	NaN	NaN	NaN	NaN	NaN	NaN	NaN	NaN	NaN	NaN	NaN	NaN	NaN	NaN	NaN	NaN	NaN	NaN
115.75	49.6	1.27	1.1	0	0.16	70	70	7.25	37	0.03	31.25	15.77	20	3.8	NaN	NaN	NaN	NaN	NaN	NaN	NaN	NaN	NaN	NaN	NaN	NaN	NaN	NaN	NaN	NaN	NaN	NaN	NaN	NaN	NaN	NaN	NaN
116	47.3	1.33	1.14	0	0.18	70	70	7.25	37	0.03	31.91	15.77	20	3.8	NaN	NaN	NaN	NaN	NaN	NaN	NaN	NaN	NaN	NaN	NaN	NaN	NaN	NaN	NaN	NaN	NaN	NaN	NaN	NaN	NaN	NaN	NaN
116.25	50	1.36	1.17	0	0.19	70	70	7.25	37	0.03	32.25	15.77	20	3.8	NaN	NaN	NaN	NaN	NaN	NaN	NaN	NaN	NaN	NaN	NaN	NaN	NaN	NaN	NaN	NaN	NaN	NaN	NaN	NaN	NaN	NaN	NaN
116.5	50.7	1.35	1.16	0	0.18	70	70	7.24	37	0.03	31.9	15.77	20	3.8	NaN	NaN	NaN	NaN	NaN	NaN	NaN	NaN	NaN	NaN	NaN	NaN	NaN	NaN	NaN	NaN	NaN	NaN	NaN	NaN	NaN	NaN	NaN
116.75	51.8	1.28	1.11	0	0.17	70	70	7.25	37	0.03	31.32	15.77	20	3.8	NaN	NaN	NaN	NaN	NaN	NaN	NaN	NaN	NaN	NaN	NaN	NaN	NaN	NaN	NaN	NaN	NaN	NaN	NaN	NaN	NaN	NaN	NaN
117	50.4	1.23	1.07	0	0.16	70	70	7.25	37	0.03	31.05	15.77	20	3.8	650	0.03	0.02	0	0.02	0.03	2.07	0.099	2250000	2182500	9.48454e-07	6.61757	255	3.34	37.408	3.08054	38.0024	0.0182501	NaN	NaN	NaN	NaN	NaN
117.25	49.4	1.26	1.1	0	0.16	70	70	7.25	37	0.03	31.19	15.77	20	3.8	NaN	NaN	NaN	NaN	NaN	NaN	NaN	NaN	NaN	NaN	NaN	NaN	NaN	NaN	NaN	NaN	NaN	NaN	NaN	NaN	NaN	NaN	NaN
117.5	47.8	1.33	1.15	0	0.19	70	70	7.25	37	0.03	32.01	15.77	20	3.8	NaN	NaN	NaN	NaN	NaN	NaN	NaN	NaN	NaN	NaN	NaN	NaN	NaN	NaN	NaN	NaN	NaN	NaN	NaN	NaN	NaN	NaN	NaN
117.75	52	1.29	1.11	0	0.18	70	70	7.25	37	0.03	31.62	15.77	20	3.8	NaN	NaN	NaN	NaN	NaN	NaN	NaN	NaN	NaN	NaN	NaN	NaN	NaN	NaN	NaN	NaN	NaN	NaN	NaN	NaN	NaN	NaN	NaN
118	51.8	1.23	1.08	0	0.15	70	70	7.25	37	0.03	30.8	15.77	20	3.8	NaN	NaN	NaN	NaN	NaN	NaN	NaN	NaN	NaN	NaN	NaN	NaN	NaN	NaN	NaN	NaN	NaN	NaN	NaN	NaN	NaN	NaN	NaN
118.25	49.3	1.25	1.1	0	0.16	70	70	7.25	37	0.03	31.18	15.77	20	3.8	NaN	NaN	NaN	NaN	NaN	NaN	NaN	NaN	NaN	NaN	NaN	NaN	NaN	NaN	NaN	NaN	NaN	NaN	NaN	NaN	NaN	NaN	NaN
118.5	50	1.26	1.1	0	0.16	70	70	7.25	37	0.03	31.19	15.77	20	3.8	NaN	NaN	NaN	NaN	NaN	NaN	NaN	NaN	NaN	NaN	NaN	NaN	NaN	NaN	NaN	NaN	NaN	NaN	NaN	NaN	NaN	NaN	NaN
118.75	48.7	1.28	1.11	0	0.17	70	70	7.25	37	0.03	31.39	15.77	20	3.8	NaN	NaN	NaN	NaN	NaN	NaN	NaN	NaN	NaN	NaN	NaN	NaN	NaN	NaN	NaN	NaN	NaN	NaN	NaN	NaN	NaN	NaN	NaN
119	48.6	1.35	1.16	0	0.19	70	70	7.25	37	0.03	32.08	15.77	20	3.8	NaN	NaN	NaN	NaN	NaN	NaN	NaN	NaN	NaN	NaN	NaN	NaN	NaN	NaN	NaN	NaN	NaN	NaN	NaN	NaN	NaN	NaN	NaN
119.25	51.3	1.3	1.12	0	0.17	70	70	7.25	37	0.03	31.57	15.77	20	3.8	NaN	NaN	NaN	NaN	NaN	NaN	NaN	NaN	NaN	NaN	NaN	NaN	NaN	NaN	NaN	NaN	NaN	NaN	NaN	NaN	NaN	NaN	NaN
119.5	49.3	1.31	1.13	0	0.18	70	70	7.24	37	0.03	31.66	15.77	20	3.8	NaN	NaN	NaN	NaN	NaN	NaN	NaN	NaN	NaN	NaN	NaN	NaN	NaN	NaN	NaN	NaN	NaN	NaN	NaN	NaN	NaN	NaN	NaN
119.75	50.8	1.31	1.13	0	0.18	70	70	7.25	37	0.03	31.64	15.77	20	3.8	NaN	NaN	NaN	NaN	NaN	NaN	NaN	NaN	NaN	NaN	NaN	NaN	NaN	NaN	NaN	NaN	NaN	NaN	NaN	NaN	NaN	NaN	NaN
0	125	0.3	0.26	0.03	0.01	80	80	7.47	35.8	8.05	21	3.68	4	3.26	700	3.55	2.49	0	2.49	3.55	0	0	51600	51600	0	0	0	0	0	0	0	0	1.58	1.58	0	0	2
0.25	121.4	0.3	0.26	0.03	0.01	80	80	7.5	37.8	10	21	3.68	4	3.26	NaN	NaN	NaN	NaN	NaN	NaN	NaN	NaN	NaN	NaN	NaN	NaN	NaN	NaN	NaN	NaN	NaN	NaN	NaN	NaN	NaN	NaN	NaN
0.5	123.7	0.3	0.26	0.03	0.01	80	80	7.49	37.3	10.16	21	3.68	4	3.26	NaN	NaN	NaN	NaN	NaN	NaN	NaN	NaN	NaN	NaN	NaN	NaN	NaN	NaN	NaN	NaN	NaN	NaN	NaN	NaN	NaN	NaN	NaN
0.75	123.1	0.3	0.26	0.03	0.01	80	80	7.48	36.3	10.39	21	3.68	4	3.26	NaN	NaN	NaN	NaN	NaN	NaN	NaN	NaN	NaN	NaN	NaN	NaN	NaN	NaN	NaN	NaN	NaN	NaN	NaN	NaN	NaN	NaN	NaN
1	120.2	0.3	0.27	0.03	0.01	80	80	7.45	37.8	10.08	21	3.68	4	3.26	NaN	NaN	NaN	NaN	NaN	NaN	NaN	NaN	NaN	NaN	NaN	NaN	NaN	NaN	NaN	NaN	NaN	NaN	NaN	NaN	NaN	NaN	NaN
1.25	122.3	0.31	0.27	0.03	0.01	80	80	7.43	36.9	9.99	21	3.68	4	3.26	NaN	NaN	NaN	NaN	NaN	NaN	NaN	NaN	NaN	NaN	NaN	NaN	NaN	NaN	NaN	NaN	NaN	NaN	NaN	NaN	NaN	NaN	NaN
1.5	121.4	0.3	0.26	0.03	0.01	80	80	7.42	36.5	9.67	21	3.68	4	3.26	NaN	NaN	NaN	NaN	NaN	NaN	NaN	NaN	NaN	NaN	NaN	NaN	NaN	NaN	NaN	NaN	NaN	NaN	NaN	NaN	NaN	NaN	NaN
1.75	119.5	0.3	0.29	0	0	80	80	7.39	37.4	0.04	21	3.68	4	3.26	NaN	NaN	NaN	NaN	NaN	NaN	NaN	NaN	NaN	NaN	NaN	NaN	NaN	NaN	NaN	NaN	NaN	NaN	NaN	NaN	NaN	NaN	NaN
2	119.3	0.3	0.3	0	0	80	80	7.4	37.2	0.04	21	3.68	4	3.26	NaN	NaN	NaN	NaN	NaN	NaN	NaN	NaN	NaN	NaN	NaN	NaN	NaN	NaN	NaN	NaN	NaN	NaN	NaN	NaN	NaN	NaN	NaN
2.25	118.9	0.3	0.29	0	0	80	80	7.41	36.7	0.34	21	3.68	4	3.26	NaN	NaN	NaN	NaN	NaN	NaN	NaN	NaN	NaN	NaN	NaN	NaN	NaN	NaN	NaN	NaN	NaN	NaN	NaN	NaN	NaN	NaN	NaN
2.5	118.7	0.3	0.29	0	0	80	80	7.43	36.9	0.8	21	3.68	4	3.26	NaN	NaN	NaN	NaN	NaN	NaN	NaN	NaN	NaN	NaN	NaN	NaN	NaN	NaN	NaN	NaN	NaN	NaN	NaN	NaN	NaN	NaN	NaN
2.75	118.2	0.3	0.29	0	0	80	80	7.44	37.2	1.44	21	3.68	4	3.26	NaN	NaN	NaN	NaN	NaN	NaN	NaN	NaN	NaN	NaN	NaN	NaN	NaN	NaN	NaN	NaN	NaN	NaN	NaN	NaN	NaN	NaN	NaN
3	118	0.3	0.28	0.01	0	80	80	7.47	37	2.33	21	3.68	4	3.26	NaN	NaN	NaN	NaN	NaN	NaN	NaN	NaN	NaN	NaN	NaN	NaN	NaN	NaN	NaN	NaN	NaN	NaN	NaN	NaN	NaN	NaN	NaN
3.25	117.5	0.3	0.28	0.01	0	80	80	7.48	36.9	4.6	21	3.68	4	3.26	NaN	NaN	NaN	NaN	NaN	NaN	NaN	NaN	NaN	NaN	NaN	NaN	NaN	NaN	NaN	NaN	NaN	NaN	NaN	NaN	NaN	NaN	NaN
3.5	116.3	0.3	0.28	0.02	0	80	80	7.48	37	5.5	21	3.68	4	3.26	NaN	NaN	NaN	NaN	NaN	NaN	NaN	NaN	NaN	NaN	NaN	NaN	NaN	NaN	NaN	NaN	NaN	NaN	NaN	NaN	NaN	NaN	NaN
3.75	116.6	0.3	0.27	0.02	0.01	80	80	7.49	37.1	6.59	21	3.68	4	3.26	NaN	NaN	NaN	NaN	NaN	NaN	NaN	NaN	NaN	NaN	NaN	NaN	NaN	NaN	NaN	NaN	NaN	NaN	NaN	NaN	NaN	NaN	NaN
4	117.3	0.3	0.27	0.02	0.01	80	80	7.49	37	7.39	21	3.68	4	3.26	NaN	NaN	NaN	NaN	NaN	NaN	NaN	NaN	NaN	NaN	NaN	NaN	NaN	NaN	NaN	NaN	NaN	NaN	NaN	NaN	NaN	NaN	NaN
4.25	116.8	0.3	0.27	0.02	0.01	80	80	7.48	36.9	7.98	21	3.68	4	3.26	NaN	NaN	NaN	NaN	NaN	NaN	NaN	NaN	NaN	NaN	NaN	NaN	NaN	NaN	NaN	NaN	NaN	NaN	NaN	NaN	NaN	NaN	NaN
4.5	117.3	0.29	0.26	0.02	0.01	80	80	7.47	37	8.58	21	3.68	4	3.26	NaN	NaN	NaN	NaN	NaN	NaN	NaN	NaN	NaN	NaN	NaN	NaN	NaN	NaN	NaN	NaN	NaN	NaN	NaN	NaN	NaN	NaN	NaN
4.75	118.1	0.3	0.26	0.03	0.01	80	80	7.46	37	8.99	21	3.68	4	3.26	NaN	NaN	NaN	NaN	NaN	NaN	NaN	NaN	NaN	NaN	NaN	NaN	NaN	NaN	NaN	NaN	NaN	NaN	NaN	NaN	NaN	NaN	NaN
5	117.4	0.3	0.26	0.03	0.01	80	80	7.44	37	9.16	21	3.68	4	3.26	NaN	NaN	NaN	NaN	NaN	NaN	NaN	NaN	NaN	NaN	NaN	NaN	NaN	NaN	NaN	NaN	NaN	NaN	NaN	NaN	NaN	NaN	NaN
5.25	117	0.28	0.24	0.03	0.01	80	80	7.43	37	9.31	21	3.68	4	3.26	NaN	NaN	NaN	NaN	NaN	NaN	NaN	NaN	NaN	NaN	NaN	NaN	NaN	NaN	NaN	NaN	NaN	NaN	NaN	NaN	NaN	NaN	NaN
5.5	117.4	0.3	0.26	0.03	0.01	80	80	7.41	37	9.36	21	3.68	4	3.26	NaN	NaN	NaN	NaN	NaN	NaN	NaN	NaN	NaN	NaN	NaN	NaN	NaN	NaN	NaN	NaN	NaN	NaN	NaN	NaN	NaN	NaN	NaN
5.75	117	0.3	0.26	0.03	0.01	80	80	7.4	37	9.31	21	3.68	4	3.26	NaN	NaN	NaN	NaN	NaN	NaN	NaN	NaN	NaN	NaN	NaN	NaN	NaN	NaN	NaN	NaN	NaN	NaN	NaN	NaN	NaN	NaN	NaN
6	117.2	0.29	0.26	0.03	0.01	80	80	7.38	37	9.28	21	3.68	4	3.26	NaN	NaN	NaN	NaN	NaN	NaN	NaN	NaN	NaN	NaN	NaN	NaN	NaN	NaN	NaN	NaN	NaN	NaN	NaN	NaN	NaN	NaN	NaN
6.25	117.1	0.3	0.26	0.03	0.01	80	80	7.37	37	9.15	21	3.68	4	3.26	NaN	NaN	NaN	NaN	NaN	NaN	NaN	NaN	NaN	NaN	NaN	NaN	NaN	NaN	NaN	NaN	NaN	NaN	NaN	NaN	NaN	NaN	NaN
6.5	117.4	0.3	0.26	0.03	0.01	80	80	7.36	37	8.96	21	3.68	4	3.26	NaN	NaN	NaN	NaN	NaN	NaN	NaN	NaN	NaN	NaN	NaN	NaN	NaN	NaN	NaN	NaN	NaN	NaN	NaN	NaN	NaN	NaN	NaN
6.75	117	0.3	0.3	0.01	0	80	80	7.35	37	0.04	21	3.68	4	3.26	NaN	NaN	NaN	NaN	NaN	NaN	NaN	NaN	NaN	NaN	NaN	NaN	NaN	NaN	NaN	NaN	NaN	NaN	NaN	NaN	NaN	NaN	NaN
7	118.2	0.3	0.3	0	0	80	80	7.36	37	0.23	21	3.68	4	3.26	NaN	NaN	NaN	NaN	NaN	NaN	NaN	NaN	NaN	NaN	NaN	NaN	NaN	NaN	NaN	NaN	NaN	NaN	NaN	NaN	NaN	NaN	NaN
7.25	118.2	0.3	0.29	0	0	80	80	7.37	37	0.64	21	3.68	4	3.26	NaN	NaN	NaN	NaN	NaN	NaN	NaN	NaN	NaN	NaN	NaN	NaN	NaN	NaN	NaN	NaN	NaN	NaN	NaN	NaN	NaN	NaN	NaN
7.5	117.8	0.3	0.29	0	0	80	80	7.39	37	1.3	21	3.68	4	3.26	NaN	NaN	NaN	NaN	NaN	NaN	NaN	NaN	NaN	NaN	NaN	NaN	NaN	NaN	NaN	NaN	NaN	NaN	NaN	NaN	NaN	NaN	NaN
7.75	117.3	0.3	0.29	0.01	0	80	80	7.41	37	2.09	21	3.68	4	3.26	NaN	NaN	NaN	NaN	NaN	NaN	NaN	NaN	NaN	NaN	NaN	NaN	NaN	NaN	NaN	NaN	NaN	NaN	NaN	NaN	NaN	NaN	NaN
8	116.7	0.3	0.29	0.01	0	80	80	7.42	37	2.83	21	3.68	4	3.26	NaN	NaN	NaN	NaN	NaN	NaN	NaN	NaN	NaN	NaN	NaN	NaN	NaN	NaN	NaN	NaN	NaN	NaN	NaN	NaN	NaN	NaN	NaN
8.25	116	0.3	0.28	0.01	0	80	80	7.44	37	3.62	21	3.68	4	3.26	NaN	NaN	NaN	NaN	NaN	NaN	NaN	NaN	NaN	NaN	NaN	NaN	NaN	NaN	NaN	NaN	NaN	NaN	NaN	NaN	NaN	NaN	NaN
8.5	114.9	0.3	0.28	0.01	0	80	80	7.44	37	4.37	21	3.68	4	3.26	NaN	NaN	NaN	NaN	NaN	NaN	NaN	NaN	NaN	NaN	NaN	NaN	NaN	NaN	NaN	NaN	NaN	NaN	NaN	NaN	NaN	NaN	NaN
8.75	114.1	0.3	0.28	0.02	0	80	80	7.45	37	5.17	21	3.68	4	3.26	NaN	NaN	NaN	NaN	NaN	NaN	NaN	NaN	NaN	NaN	NaN	NaN	NaN	NaN	NaN	NaN	NaN	NaN	NaN	NaN	NaN	NaN	NaN
9	113.9	0.3	0.27	0.02	0	80	80	7.45	37	5.93	21	3.68	4	3.26	NaN	NaN	NaN	NaN	NaN	NaN	NaN	NaN	NaN	NaN	NaN	NaN	NaN	NaN	NaN	NaN	NaN	NaN	NaN	NaN	NaN	NaN	NaN
9.25	115.3	0.3	0.27	0.02	0.01	80	80	7.46	37	6.6	21	3.68	4	3.26	NaN	NaN	NaN	NaN	NaN	NaN	NaN	NaN	NaN	NaN	NaN	NaN	NaN	NaN	NaN	NaN	NaN	NaN	NaN	NaN	NaN	NaN	NaN
9.5	114.6	0.3	0.27	0.02	0.01	80	80	7.45	37	7.18	21	3.68	4	3.26	NaN	NaN	NaN	NaN	NaN	NaN	NaN	NaN	NaN	NaN	NaN	NaN	NaN	NaN	NaN	NaN	NaN	NaN	NaN	NaN	NaN	NaN	NaN
9.75	114.2	0.3	0.27	0.02	0.01	80	80	7.45	37	7.65	21	3.68	4	3.26	NaN	NaN	NaN	NaN	NaN	NaN	NaN	NaN	NaN	NaN	NaN	NaN	NaN	NaN	NaN	NaN	NaN	NaN	NaN	NaN	NaN	NaN	NaN
10	114.1	0.29	0.27	0.02	0.01	80	80	7.44	37	8.01	21	3.68	4	3.26	NaN	NaN	NaN	NaN	NaN	NaN	NaN	NaN	NaN	NaN	NaN	NaN	NaN	NaN	NaN	NaN	NaN	NaN	NaN	NaN	NaN	NaN	NaN
10.25	114.3	0.3	0.27	0.02	0.01	80	80	7.43	37	8.29	21	3.68	4	3.26	NaN	NaN	NaN	NaN	NaN	NaN	NaN	NaN	NaN	NaN	NaN	NaN	NaN	NaN	NaN	NaN	NaN	NaN	NaN	NaN	NaN	NaN	NaN
10.5	114.4	0.3	0.27	0.03	0.01	80	80	7.42	37	8.55	21	3.68	4	3.26	NaN	NaN	NaN	NaN	NaN	NaN	NaN	NaN	NaN	NaN	NaN	NaN	NaN	NaN	NaN	NaN	NaN	NaN	NaN	NaN	NaN	NaN	NaN
10.75	114.7	0.3	0.27	0.03	0.01	80	80	7.41	37	8.65	21	3.68	4	3.26	NaN	NaN	NaN	NaN	NaN	NaN	NaN	NaN	NaN	NaN	NaN	NaN	NaN	NaN	NaN	NaN	NaN	NaN	NaN	NaN	NaN	NaN	NaN
11	114.8	0.3	0.26	0.03	0.01	80	80	7.4	37	8.75	21	3.68	4	3.26	NaN	NaN	NaN	NaN	NaN	NaN	NaN	NaN	NaN	NaN	NaN	NaN	NaN	NaN	NaN	NaN	NaN	NaN	NaN	NaN	NaN	NaN	NaN
11.25	115	0.3	0.26	0.03	0.01	80	80	7.39	37	8.77	21	3.68	4	3.26	NaN	NaN	NaN	NaN	NaN	NaN	NaN	NaN	NaN	NaN	NaN	NaN	NaN	NaN	NaN	NaN	NaN	NaN	NaN	NaN	NaN	NaN	NaN
11.5	115.3	0.3	0.26	0.03	0.01	80	80	7.38	37	8.73	21	3.68	4	3.26	NaN	NaN	NaN	NaN	NaN	NaN	NaN	NaN	NaN	NaN	NaN	NaN	NaN	NaN	NaN	NaN	NaN	NaN	NaN	NaN	NaN	NaN	NaN
11.75	115.2	0.3	0.27	0.03	0.01	80	80	7.37	37	8.65	21	3.68	4	3.26	NaN	NaN	NaN	NaN	NaN	NaN	NaN	NaN	NaN	NaN	NaN	NaN	NaN	NaN	NaN	NaN	NaN	NaN	NaN	NaN	NaN	NaN	NaN
12	115.4	0.3	0.26	0.03	0.01	80	80	7.36	37	8.54	21	3.68	4	3.26	NaN	NaN	NaN	NaN	NaN	NaN	NaN	NaN	NaN	NaN	NaN	NaN	NaN	NaN	NaN	NaN	NaN	NaN	NaN	NaN	NaN	NaN	NaN
12.25	115.4	0.3	0.27	0.02	0.01	80	80	7.36	37	8.4	21	3.68	4	3.26	NaN	NaN	NaN	NaN	NaN	NaN	NaN	NaN	NaN	NaN	NaN	NaN	NaN	NaN	NaN	NaN	NaN	NaN	NaN	NaN	NaN	NaN	NaN
12.5	115.8	0.3	0.3	0	0	80	80	7.35	37	0.04	21	3.68	4	3.26	NaN	NaN	NaN	NaN	NaN	NaN	NaN	NaN	NaN	NaN	NaN	NaN	NaN	NaN	NaN	NaN	NaN	NaN	NaN	NaN	NaN	NaN	NaN
12.75	115.3	0.3	0.29	0	0	80	80	7.36	37	0.28	21	3.68	4	3.26	NaN	NaN	NaN	NaN	NaN	NaN	NaN	NaN	NaN	NaN	NaN	NaN	NaN	NaN	NaN	NaN	NaN	NaN	NaN	NaN	NaN	NaN	NaN
13	114.9	0.3	0.29	0	0	80	80	7.38	37	0.79	21	3.68	4	3.26	NaN	NaN	NaN	NaN	NaN	NaN	NaN	NaN	NaN	NaN	NaN	NaN	NaN	NaN	NaN	NaN	NaN	NaN	NaN	NaN	NaN	NaN	NaN
13.25	114.4	0.3	0.29	0	0	80	80	7.39	37	1.45	21	3.68	4	3.26	NaN	NaN	NaN	NaN	NaN	NaN	NaN	NaN	NaN	NaN	NaN	NaN	NaN	NaN	NaN	NaN	NaN	NaN	NaN	NaN	NaN	NaN	NaN
13.5	113.8	0.3	0.29	0.01	0	80	80	7.41	37	2.3	21	3.68	4	3.26	NaN	NaN	NaN	NaN	NaN	NaN	NaN	NaN	NaN	NaN	NaN	NaN	NaN	NaN	NaN	NaN	NaN	NaN	NaN	NaN	NaN	NaN	NaN
13.75	113.6	0.29	0.28	0.01	0	80	80	7.44	37	3.28	21	3.68	4	3.26	NaN	NaN	NaN	NaN	NaN	NaN	NaN	NaN	NaN	NaN	NaN	NaN	NaN	NaN	NaN	NaN	NaN	NaN	NaN	NaN	NaN	NaN	NaN
14	113.5	0.3	0.28	0.01	0	80	80	7.44	37	3.91	21	3.68	4	3.26	NaN	NaN	NaN	NaN	NaN	NaN	NaN	NaN	NaN	NaN	NaN	NaN	NaN	NaN	NaN	NaN	NaN	NaN	NaN	NaN	NaN	NaN	NaN
14.25	113.3	0.29	0.27	0.01	0	80	80	7.46	37	4.91	21	3.68	4	3.26	NaN	NaN	NaN	NaN	NaN	NaN	NaN	NaN	NaN	NaN	NaN	NaN	NaN	NaN	NaN	NaN	NaN	NaN	NaN	NaN	NaN	NaN	NaN
14.5	113.2	0.3	0.28	0.02	0	80	80	7.45	37	5.57	21	3.68	4	3.26	NaN	NaN	NaN	NaN	NaN	NaN	NaN	NaN	NaN	NaN	NaN	NaN	NaN	NaN	NaN	NaN	NaN	NaN	NaN	NaN	NaN	NaN	NaN
14.75	113.2	0.3	0.27	0.02	0	80	80	7.46	37	6.24	21	3.68	4	3.26	NaN	NaN	NaN	NaN	NaN	NaN	NaN	NaN	NaN	NaN	NaN	NaN	NaN	NaN	NaN	NaN	NaN	NaN	NaN	NaN	NaN	NaN	NaN
15	113.3	0.3	0.27	0.02	0.01	80	80	7.46	37	7.07	21	3.68	4	3.26	NaN	NaN	NaN	NaN	NaN	NaN	NaN	NaN	NaN	NaN	NaN	NaN	NaN	NaN	NaN	NaN	NaN	NaN	NaN	NaN	NaN	NaN	NaN
15.25	113.4	0.3	0.27	0.02	0.01	80	80	7.46	37	7.55	21	3.68	4	3.26	NaN	NaN	NaN	NaN	NaN	NaN	NaN	NaN	NaN	NaN	NaN	NaN	NaN	NaN	NaN	NaN	NaN	NaN	NaN	NaN	NaN	NaN	NaN
15.5	113.8	0.3	0.27	0.02	0.01	80	80	7.45	37	7.98	21	3.68	4	3.26	NaN	NaN	NaN	NaN	NaN	NaN	NaN	NaN	NaN	NaN	NaN	NaN	NaN	NaN	NaN	NaN	NaN	NaN	NaN	NaN	NaN	NaN	NaN
15.75	114.2	0.3	0.27	0.02	0.01	80	80	7.44	37	8.3	21	3.68	4	3.26	NaN	NaN	NaN	NaN	NaN	NaN	NaN	NaN	NaN	NaN	NaN	NaN	NaN	NaN	NaN	NaN	NaN	NaN	NaN	NaN	NaN	NaN	NaN
16	114.3	0.3	0.26	0.03	0.01	80	80	7.43	37	8.56	21	3.68	4	3.26	NaN	NaN	NaN	NaN	NaN	NaN	NaN	NaN	NaN	NaN	NaN	NaN	NaN	NaN	NaN	NaN	NaN	NaN	NaN	NaN	NaN	NaN	NaN
16.25	115.1	0.3	0.26	0.03	0.01	80	80	7.42	37	8.86	21	3.68	4	3.26	NaN	NaN	NaN	NaN	NaN	NaN	NaN	NaN	NaN	NaN	NaN	NaN	NaN	NaN	NaN	NaN	NaN	NaN	NaN	NaN	NaN	NaN	NaN
16.5	114.9	0.3	0.26	0.03	0.01	80	80	7.4	37	8.89	21	3.68	4	3.26	NaN	NaN	NaN	NaN	NaN	NaN	NaN	NaN	NaN	NaN	NaN	NaN	NaN	NaN	NaN	NaN	NaN	NaN	NaN	NaN	NaN	NaN	NaN
16.75	114.8	0.3	0.26	0.03	0.01	80	80	7.39	37	8.91	21	3.68	4	3.26	NaN	NaN	NaN	NaN	NaN	NaN	NaN	NaN	NaN	NaN	NaN	NaN	NaN	NaN	NaN	NaN	NaN	NaN	NaN	NaN	NaN	NaN	NaN
17	115.9	0.3	0.26	0.03	0.01	80	80	7.39	37	8.97	21	3.68	4	3.26	NaN	NaN	NaN	NaN	NaN	NaN	NaN	NaN	NaN	NaN	NaN	NaN	NaN	NaN	NaN	NaN	NaN	NaN	NaN	NaN	NaN	NaN	NaN
17.25	115.4	0.3	0.26	0.03	0.01	80	80	7.38	37	8.87	21	3.68	4	3.26	NaN	NaN	NaN	NaN	NaN	NaN	NaN	NaN	NaN	NaN	NaN	NaN	NaN	NaN	NaN	NaN	NaN	NaN	NaN	NaN	NaN	NaN	NaN
17.5	115.3	0.3	0.27	0.03	0.01	80	80	7.36	37	8.72	21	3.68	4	3.26	NaN	NaN	NaN	NaN	NaN	NaN	NaN	NaN	NaN	NaN	NaN	NaN	NaN	NaN	NaN	NaN	NaN	NaN	NaN	NaN	NaN	NaN	NaN
17.75	114.9	0.3	0.26	0.03	0.01	80	80	7.35	37	8.49	21	3.68	4	3.26	NaN	NaN	NaN	NaN	NaN	NaN	NaN	NaN	NaN	NaN	NaN	NaN	NaN	NaN	NaN	NaN	NaN	NaN	NaN	NaN	NaN	NaN	NaN
18	114.9	0.3	0.3	0	0	80	80	7.35	37	0.04	21	3.68	4	3.26	NaN	NaN	NaN	NaN	NaN	NaN	NaN	NaN	NaN	NaN	NaN	NaN	NaN	NaN	NaN	NaN	NaN	NaN	NaN	NaN	NaN	NaN	NaN
18.25	114.6	0.3	0.3	0	0	80	80	7.35	37	0.1	21	3.68	4	3.26	NaN	NaN	NaN	NaN	NaN	NaN	NaN	NaN	NaN	NaN	NaN	NaN	NaN	NaN	NaN	NaN	NaN	NaN	NaN	NaN	NaN	NaN	NaN
18.5	114	0.3	0.29	0	0	80	80	7.37	37	0.52	21	3.68	4	3.26	NaN	NaN	NaN	NaN	NaN	NaN	NaN	NaN	NaN	NaN	NaN	NaN	NaN	NaN	NaN	NaN	NaN	NaN	NaN	NaN	NaN	NaN	NaN
18.75	113.4	0.3	0.29	0	0	80	80	7.39	37	1.13	21	3.68	4	3.26	NaN	NaN	NaN	NaN	NaN	NaN	NaN	NaN	NaN	NaN	NaN	NaN	NaN	NaN	NaN	NaN	NaN	NaN	NaN	NaN	NaN	NaN	NaN
19	113.2	0.3	0.29	0.01	0	80	80	7.41	37	1.9	21	3.68	4	3.26	NaN	NaN	NaN	NaN	NaN	NaN	NaN	NaN	NaN	NaN	NaN	NaN	NaN	NaN	NaN	NaN	NaN	NaN	NaN	NaN	NaN	NaN	NaN
19.25	112.7	0.3	0.29	0.01	0	80	80	7.43	37	2.83	21	3.68	4	3.26	NaN	NaN	NaN	NaN	NaN	NaN	NaN	NaN	NaN	NaN	NaN	NaN	NaN	NaN	NaN	NaN	NaN	NaN	NaN	NaN	NaN	NaN	NaN
19.5	112.2	0.3	0.28	0.01	0	80	80	7.43	37	3.54	21	3.68	4	3.26	NaN	NaN	NaN	NaN	NaN	NaN	NaN	NaN	NaN	NaN	NaN	NaN	NaN	NaN	NaN	NaN	NaN	NaN	NaN	NaN	NaN	NaN	NaN
19.75	112.4	0.3	0.28	0.01	0	80	80	7.45	37	4.44	21	3.68	4	3.26	NaN	NaN	NaN	NaN	NaN	NaN	NaN	NaN	NaN	NaN	NaN	NaN	NaN	NaN	NaN	NaN	NaN	NaN	NaN	NaN	NaN	NaN	NaN
20	112.2	0.3	0.28	0.02	0	80	80	7.45	37	5.17	21	3.68	4	3.26	NaN	NaN	NaN	NaN	NaN	NaN	NaN	NaN	NaN	NaN	NaN	NaN	NaN	NaN	NaN	NaN	NaN	NaN	NaN	NaN	NaN	NaN	NaN
20.25	112.7	0.31	0.28	0.02	0	80	80	7.46	37	6.1	21	3.68	4	3.26	NaN	NaN	NaN	NaN	NaN	NaN	NaN	NaN	NaN	NaN	NaN	NaN	NaN	NaN	NaN	NaN	NaN	NaN	NaN	NaN	NaN	NaN	NaN
20.5	112.9	0.3	0.28	0.02	0.01	80	80	7.46	37	6.72	21	3.68	4	3.26	NaN	NaN	NaN	NaN	NaN	NaN	NaN	NaN	NaN	NaN	NaN	NaN	NaN	NaN	NaN	NaN	NaN	NaN	NaN	NaN	NaN	NaN	NaN
20.75	113.9	0.3	0.27	0.02	0.01	80	80	7.46	37	7.31	21	3.68	4	3.26	NaN	NaN	NaN	NaN	NaN	NaN	NaN	NaN	NaN	NaN	NaN	NaN	NaN	NaN	NaN	NaN	NaN	NaN	NaN	NaN	NaN	NaN	NaN
21	113.6	0.3	0.27	0.02	0.01	80	80	7.45	37	7.86	21	3.68	4	3.26	690	3.09	2.1321	0	2	3.09	0.464586	0.0221231	NaN	57500	8.07976e-06	0.464586	179	0.26	2.912	0.156191	134.529	0.00515539	NaN	NaN	NaN	NaN	NaN
21.25	114	0.3	0.27	0.02	0.01	80	80	7.44	37	8.19	21	3.68	4	3.26	NaN	NaN	NaN	NaN	NaN	NaN	NaN	NaN	NaN	NaN	NaN	NaN	NaN	NaN	NaN	NaN	NaN	NaN	NaN	NaN	NaN	NaN	NaN
21.5	114.7	0.3	0.26	0.03	0.01	80	80	7.43	37	8.47	21	3.68	4	3.26	NaN	NaN	NaN	NaN	NaN	NaN	NaN	NaN	NaN	NaN	NaN	NaN	NaN	NaN	NaN	NaN	NaN	NaN	NaN	NaN	NaN	NaN	NaN
21.75	113.8	0.3	0.26	0.03	0.01	80	80	7.42	37	8.65	21	3.68	4	3.26	NaN	NaN	NaN	NaN	NaN	NaN	NaN	NaN	NaN	NaN	NaN	NaN	NaN	NaN	NaN	NaN	NaN	NaN	NaN	NaN	NaN	NaN	NaN
22	114	0.3	0.26	0.03	0.01	80	80	7.41	37	8.68	21	3.68	4	3.26	NaN	NaN	NaN	NaN	NaN	NaN	NaN	NaN	NaN	NaN	NaN	NaN	NaN	NaN	NaN	NaN	NaN	NaN	NaN	NaN	NaN	NaN	NaN
22.25	113.7	0.3	0.26	0.03	0.01	80	80	7.39	37	8.69	21	3.68	4	3.26	NaN	NaN	NaN	NaN	NaN	NaN	NaN	NaN	NaN	NaN	NaN	NaN	NaN	NaN	NaN	NaN	NaN	NaN	NaN	NaN	NaN	NaN	NaN
22.5	114.3	0.31	0.27	0.03	0.01	80	80	7.38	37	8.62	21	3.68	4	3.26	NaN	NaN	NaN	NaN	NaN	NaN	NaN	NaN	NaN	NaN	NaN	NaN	NaN	NaN	NaN	NaN	NaN	NaN	NaN	NaN	NaN	NaN	NaN
22.75	115.2	0.3	0.26	0.03	0.01	80	80	7.37	37	8.54	21	3.68	4	3.26	NaN	NaN	NaN	NaN	NaN	NaN	NaN	NaN	NaN	NaN	NaN	NaN	NaN	NaN	NaN	NaN	NaN	NaN	NaN	NaN	NaN	NaN	NaN
23	115.7	0.3	0.26	0.02	0.01	80	80	7.36	37	8.37	21	3.68	4	3.26	NaN	NaN	NaN	NaN	NaN	NaN	NaN	NaN	NaN	NaN	NaN	NaN	NaN	NaN	NaN	NaN	NaN	NaN	NaN	NaN	NaN	NaN	NaN
23.25	115	0.3	0.27	0.02	0	80	80	7.35	37	0.04	21	3.68	4	3.26	NaN	NaN	NaN	NaN	NaN	NaN	NaN	NaN	NaN	NaN	NaN	NaN	NaN	NaN	NaN	NaN	NaN	NaN	NaN	NaN	NaN	NaN	NaN
23.5	113.9	0.3	0.3	0	0	80	80	7.35	37	0.04	21	3.68	4	3.26	NaN	NaN	NaN	NaN	NaN	NaN	NaN	NaN	NaN	NaN	NaN	NaN	NaN	NaN	NaN	NaN	NaN	NaN	NaN	NaN	NaN	NaN	NaN
23.75	113	0.3	0.29	0	0	80	80	7.36	37	0.28	21	3.68	4	3.26	NaN	NaN	NaN	NaN	NaN	NaN	NaN	NaN	NaN	NaN	NaN	NaN	NaN	NaN	NaN	NaN	NaN	NaN	NaN	NaN	NaN	NaN	NaN
24	112.5	0.3	0.29	0	0	80	80	7.38	37	0.75	21	3.68	4	3.26	NaN	NaN	NaN	NaN	NaN	NaN	NaN	NaN	NaN	NaN	NaN	NaN	NaN	NaN	NaN	NaN	NaN	NaN	NaN	NaN	NaN	NaN	NaN
24.25	112	0.3	0.29	0	0	130	130	7.39	37	1.44	21	3.68	4	3.26	NaN	NaN	NaN	NaN	NaN	NaN	NaN	NaN	NaN	NaN	NaN	NaN	NaN	NaN	NaN	NaN	NaN	NaN	NaN	NaN	NaN	NaN	NaN
24.5	111.7	0.3	0.29	0.01	0	130	130	7.42	37	2.43	21	3.68	4	3.26	NaN	NaN	NaN	NaN	NaN	NaN	NaN	NaN	NaN	NaN	NaN	NaN	NaN	NaN	NaN	NaN	NaN	NaN	NaN	NaN	NaN	NaN	NaN
24.75	111.5	0.3	0.28	0.01	0	130	130	7.43	37	3.08	21	3.68	4	3.26	NaN	NaN	NaN	NaN	NaN	NaN	NaN	NaN	NaN	NaN	NaN	NaN	NaN	NaN	NaN	NaN	NaN	NaN	NaN	NaN	NaN	NaN	NaN
25	112.7	0.3	0.28	0.01	0	130	130	7.44	37	4.04	21	3.68	4	3.26	NaN	NaN	NaN	NaN	NaN	NaN	NaN	NaN	NaN	NaN	NaN	NaN	NaN	NaN	NaN	NaN	NaN	NaN	NaN	NaN	NaN	NaN	NaN
25.25	112.3	0.31	0.29	0.01	0	130	130	7.45	37	4.79	21	3.68	4	3.26	NaN	NaN	NaN	NaN	NaN	NaN	NaN	NaN	NaN	NaN	NaN	NaN	NaN	NaN	NaN	NaN	NaN	NaN	NaN	NaN	NaN	NaN	NaN
25.5	113.5	0.3	0.28	0.02	0	130	130	7.46	37	5.68	21	3.68	4	3.26	NaN	NaN	NaN	NaN	NaN	NaN	NaN	NaN	NaN	NaN	NaN	NaN	NaN	NaN	NaN	NaN	NaN	NaN	NaN	NaN	NaN	NaN	NaN
25.75	113.5	0.3	0.28	0.02	0.01	130	130	7.46	37	6.27	21	3.68	4	3.26	NaN	NaN	NaN	NaN	NaN	NaN	NaN	NaN	NaN	NaN	NaN	NaN	NaN	NaN	NaN	NaN	NaN	NaN	NaN	NaN	NaN	NaN	NaN
26	115.5	0.28	0.25	0.02	0.01	130	130	7.46	37	7.02	21	3.68	4	3.26	NaN	NaN	NaN	NaN	NaN	NaN	NaN	NaN	NaN	NaN	NaN	NaN	NaN	NaN	NaN	NaN	NaN	NaN	NaN	NaN	NaN	NaN	NaN
26.25	114.7	0.3	0.27	0.02	0.01	130	130	7.45	37	7.49	21	3.68	4	3.26	NaN	NaN	NaN	NaN	NaN	NaN	NaN	NaN	NaN	NaN	NaN	NaN	NaN	NaN	NaN	NaN	NaN	NaN	NaN	NaN	NaN	NaN	NaN
26.5	117.2	0.3	0.27	0.02	0.01	130	130	7.44	37	7.86	21	3.68	4	3.26	NaN	NaN	NaN	NaN	NaN	NaN	NaN	NaN	NaN	NaN	NaN	NaN	NaN	NaN	NaN	NaN	NaN	NaN	NaN	NaN	NaN	NaN	NaN
26.75	117.2	0.3	0.26	0.02	0.01	130	130	7.43	37	8.07	21	3.68	4	3.26	NaN	NaN	NaN	NaN	NaN	NaN	NaN	NaN	NaN	NaN	NaN	NaN	NaN	NaN	NaN	NaN	NaN	NaN	NaN	NaN	NaN	NaN	NaN
27	115.6	0.31	0.28	0.03	0.01	130	130	7.42	37	8.2	21	3.68	4	3.26	NaN	NaN	NaN	NaN	NaN	NaN	NaN	NaN	NaN	NaN	NaN	NaN	NaN	NaN	NaN	NaN	NaN	NaN	NaN	NaN	NaN	NaN	NaN
27.25	114.9	0.29	0.26	0.02	0.01	130	130	7.4	37	8.27	21	3.68	4	3.26	NaN	NaN	NaN	NaN	NaN	NaN	NaN	NaN	NaN	NaN	NaN	NaN	NaN	NaN	NaN	NaN	NaN	NaN	NaN	NaN	NaN	NaN	NaN
27.5	118.3	0.3	0.27	0.02	0.01	130	130	7.39	37	8.29	21	3.68	4	3.26	NaN	NaN	NaN	NaN	NaN	NaN	NaN	NaN	NaN	NaN	NaN	NaN	NaN	NaN	NaN	NaN	NaN	NaN	NaN	NaN	NaN	NaN	NaN
27.75	116.8	0.3	0.27	0.02	0.01	130	130	7.38	37	8.12	21	3.68	4	3.26	NaN	NaN	NaN	NaN	NaN	NaN	NaN	NaN	NaN	NaN	NaN	NaN	NaN	NaN	NaN	NaN	NaN	NaN	NaN	NaN	NaN	NaN	NaN
28	114.8	0.3	0.27	0.02	0.01	130	130	7.36	37	7.9	21	3.68	4	3.26	NaN	NaN	NaN	NaN	NaN	NaN	NaN	NaN	NaN	NaN	NaN	NaN	NaN	NaN	NaN	NaN	NaN	NaN	NaN	NaN	NaN	NaN	NaN
28.25	114.8	0.3	0.3	0	0	130	130	7.35	37	0.05	21	3.68	4	3.26	NaN	NaN	NaN	NaN	NaN	NaN	NaN	NaN	NaN	NaN	NaN	NaN	NaN	NaN	NaN	NaN	NaN	NaN	NaN	NaN	NaN	NaN	NaN
28.5	113.8	0.3	0.3	0	0	130	130	7.36	37	0.26	21	3.68	4	3.26	NaN	NaN	NaN	NaN	NaN	NaN	NaN	NaN	NaN	NaN	NaN	NaN	NaN	NaN	NaN	NaN	NaN	NaN	NaN	NaN	NaN	NaN	NaN
28.75	113.4	0.3	0.29	0	0	130	130	7.38	37	0.78	21	3.68	4	3.26	NaN	NaN	NaN	NaN	NaN	NaN	NaN	NaN	NaN	NaN	NaN	NaN	NaN	NaN	NaN	NaN	NaN	NaN	NaN	NaN	NaN	NaN	NaN
29	112.7	0.3	0.29	0	0	130	130	7.4	37	1.52	21	3.68	4	3.26	NaN	NaN	NaN	NaN	NaN	NaN	NaN	NaN	NaN	NaN	NaN	NaN	NaN	NaN	NaN	NaN	NaN	NaN	NaN	NaN	NaN	NaN	NaN
29.25	112.4	0.3	0.29	0.01	0	130	130	7.42	37	2.43	21	3.68	4	3.26	NaN	NaN	NaN	NaN	NaN	NaN	NaN	NaN	NaN	NaN	NaN	NaN	NaN	NaN	NaN	NaN	NaN	NaN	NaN	NaN	NaN	NaN	NaN
29.5	112.5	0.3	0.29	0.01	0	130	130	7.42	37	3.04	21	3.68	4	3.26	NaN	NaN	NaN	NaN	NaN	NaN	NaN	NaN	NaN	NaN	NaN	NaN	NaN	NaN	NaN	NaN	NaN	NaN	NaN	NaN	NaN	NaN	NaN
29.75	112.8	0.3	0.28	0.01	0	130	130	7.44	37	3.88	21	3.68	4	3.26	NaN	NaN	NaN	NaN	NaN	NaN	NaN	NaN	NaN	NaN	NaN	NaN	NaN	NaN	NaN	NaN	NaN	NaN	NaN	NaN	NaN	NaN	NaN
30	112.5	0.3	0.28	0.01	0	130	130	7.45	37	4.72	21	3.68	4	3.26	NaN	NaN	NaN	NaN	NaN	NaN	NaN	NaN	NaN	NaN	NaN	NaN	NaN	NaN	NaN	NaN	NaN	NaN	NaN	NaN	NaN	NaN	NaN
30.25	113.3	0.3	0.28	0.02	0	130	130	7.45	37	5.44	21	3.68	4	3.26	NaN	NaN	NaN	NaN	NaN	NaN	NaN	NaN	NaN	NaN	NaN	NaN	NaN	NaN	NaN	NaN	NaN	NaN	NaN	NaN	NaN	NaN	NaN
30.5	113.4	0.3	0.27	0.02	0	130	130	7.45	37	5.96	21	3.68	4	3.26	NaN	NaN	NaN	NaN	NaN	NaN	NaN	NaN	NaN	NaN	NaN	NaN	NaN	NaN	NaN	NaN	NaN	NaN	NaN	NaN	NaN	NaN	NaN
30.75	113.2	0.3	0.27	0.02	0.01	130	130	7.45	37	6.58	21	3.68	4	3.26	NaN	NaN	NaN	NaN	NaN	NaN	NaN	NaN	NaN	NaN	NaN	NaN	NaN	NaN	NaN	NaN	NaN	NaN	NaN	NaN	NaN	NaN	NaN
31	113.6	0.29	0.27	0.02	0.01	130	130	7.45	37	7.14	21	3.68	4	3.26	NaN	NaN	NaN	NaN	NaN	NaN	NaN	NaN	NaN	NaN	NaN	NaN	NaN	NaN	NaN	NaN	NaN	NaN	NaN	NaN	NaN	NaN	NaN
31.25	114.1	0.3	0.27	0.02	0.01	130	130	7.44	37	7.43	21	3.68	4	3.26	NaN	NaN	NaN	NaN	NaN	NaN	NaN	NaN	NaN	NaN	NaN	NaN	NaN	NaN	NaN	NaN	NaN	NaN	NaN	NaN	NaN	NaN	NaN
31.5	114.4	0.3	0.27	0.02	0.01	130	130	7.43	37	7.65	21	3.68	4	3.26	NaN	NaN	NaN	NaN	NaN	NaN	NaN	NaN	NaN	NaN	NaN	NaN	NaN	NaN	NaN	NaN	NaN	NaN	NaN	NaN	NaN	NaN	NaN
31.75	114.8	0.3	0.27	0.02	0.01	130	130	7.41	37	7.77	21	3.68	4	3.26	NaN	NaN	NaN	NaN	NaN	NaN	NaN	NaN	NaN	NaN	NaN	NaN	NaN	NaN	NaN	NaN	NaN	NaN	NaN	NaN	NaN	NaN	NaN
32	114.8	0.3	0.27	0.02	0.01	130	130	7.4	37	7.86	21	3.68	4	3.26	NaN	NaN	NaN	NaN	NaN	NaN	NaN	NaN	NaN	NaN	NaN	NaN	NaN	NaN	NaN	NaN	NaN	NaN	NaN	NaN	NaN	NaN	NaN
32.25	114.7	0.3	0.27	0.02	0.01	130	130	7.39	37	7.85	21	3.68	4	3.26	NaN	NaN	NaN	NaN	NaN	NaN	NaN	NaN	NaN	NaN	NaN	NaN	NaN	NaN	NaN	NaN	NaN	NaN	NaN	NaN	NaN	NaN	NaN
32.5	114.9	0.3	0.27	0.02	0.01	130	130	7.38	37	7.84	21	3.68	4	3.26	NaN	NaN	NaN	NaN	NaN	NaN	NaN	NaN	NaN	NaN	NaN	NaN	NaN	NaN	NaN	NaN	NaN	NaN	NaN	NaN	NaN	NaN	NaN
32.75	114.6	0.3	0.27	0.02	0.01	130	130	7.37	37	7.78	21	3.68	4	3.26	NaN	NaN	NaN	NaN	NaN	NaN	NaN	NaN	NaN	NaN	NaN	NaN	NaN	NaN	NaN	NaN	NaN	NaN	NaN	NaN	NaN	NaN	NaN
33	114.6	0.3	0.27	0.02	0.01	130	130	7.36	37	7.73	21	3.68	4	3.26	NaN	NaN	NaN	NaN	NaN	NaN	NaN	NaN	NaN	NaN	NaN	NaN	NaN	NaN	NaN	NaN	NaN	NaN	NaN	NaN	NaN	NaN	NaN
33.25	114.6	0.3	0.27	0.02	0.01	130	130	7.36	37	7.66	21	3.68	4	3.26	NaN	NaN	NaN	NaN	NaN	NaN	NaN	NaN	NaN	NaN	NaN	NaN	NaN	NaN	NaN	NaN	NaN	NaN	NaN	NaN	NaN	NaN	NaN
33.5	114.8	0.3	0.3	0	0	130	130	7.35	37	0.11	21	3.68	4	3.26	NaN	NaN	NaN	NaN	NaN	NaN	NaN	NaN	NaN	NaN	NaN	NaN	NaN	NaN	NaN	NaN	NaN	NaN	NaN	NaN	NaN	NaN	NaN
33.75	113.8	0.3	0.29	0	0	130	130	7.37	37	0.53	21	3.68	4	3.26	NaN	NaN	NaN	NaN	NaN	NaN	NaN	NaN	NaN	NaN	NaN	NaN	NaN	NaN	NaN	NaN	NaN	NaN	NaN	NaN	NaN	NaN	NaN
34	113	0.3	0.29	0	0	130	130	7.39	37	1.15	21	3.68	4	3.26	NaN	NaN	NaN	NaN	NaN	NaN	NaN	NaN	NaN	NaN	NaN	NaN	NaN	NaN	NaN	NaN	NaN	NaN	NaN	NaN	NaN	NaN	NaN
34.25	112.6	0.3	0.29	0.01	0	130	130	7.41	37	1.97	21	3.68	4	3.26	NaN	NaN	NaN	NaN	NaN	NaN	NaN	NaN	NaN	NaN	NaN	NaN	NaN	NaN	NaN	NaN	NaN	NaN	NaN	NaN	NaN	NaN	NaN
34.5	112	0.3	0.29	0.01	0	130	130	7.43	37	2.95	21	3.68	4	3.26	NaN	NaN	NaN	NaN	NaN	NaN	NaN	NaN	NaN	NaN	NaN	NaN	NaN	NaN	NaN	NaN	NaN	NaN	NaN	NaN	NaN	NaN	NaN
34.75	112.9	0.3	0.28	0.01	0	130	130	7.43	37	3.46	21	3.68	4	3.26	NaN	NaN	NaN	NaN	NaN	NaN	NaN	NaN	NaN	NaN	NaN	NaN	NaN	NaN	NaN	NaN	NaN	NaN	NaN	NaN	NaN	NaN	NaN
35	112.2	0.3	0.28	0.01	0	130	130	7.45	37	4.41	21	3.68	4	3.26	NaN	NaN	NaN	NaN	NaN	NaN	NaN	NaN	NaN	NaN	NaN	NaN	NaN	NaN	NaN	NaN	NaN	NaN	NaN	NaN	NaN	NaN	NaN
35.25	112.7	0.3	0.28	0.01	0	130	130	7.44	37	4.97	21	3.68	4	3.26	NaN	NaN	NaN	NaN	NaN	NaN	NaN	NaN	NaN	NaN	NaN	NaN	NaN	NaN	NaN	NaN	NaN	NaN	NaN	NaN	NaN	NaN	NaN
35.5	112.6	0.3	0.27	0.02	0	130	130	7.46	37	5.84	21	3.68	4	3.26	NaN	NaN	NaN	NaN	NaN	NaN	NaN	NaN	NaN	NaN	NaN	NaN	NaN	NaN	NaN	NaN	NaN	NaN	NaN	NaN	NaN	NaN	NaN
35.75	113.2	0.3	0.27	0.02	0	130	130	7.45	37	6.29	21	3.68	4	3.26	NaN	NaN	NaN	NaN	NaN	NaN	NaN	NaN	NaN	NaN	NaN	NaN	NaN	NaN	NaN	NaN	NaN	NaN	NaN	NaN	NaN	NaN	NaN
36	113.8	0.3	0.27	0.02	0.01	130	130	7.44	37	6.68	21	3.68	4	3.26	NaN	NaN	NaN	NaN	NaN	NaN	NaN	NaN	NaN	NaN	NaN	NaN	NaN	NaN	NaN	NaN	NaN	NaN	NaN	NaN	NaN	NaN	NaN
36.25	113	0.3	0.27	0.02	0.01	130	130	7.43	37	7.05	21	3.68	4	3.26	NaN	NaN	NaN	NaN	NaN	NaN	NaN	NaN	NaN	NaN	NaN	NaN	NaN	NaN	NaN	NaN	NaN	NaN	NaN	NaN	NaN	NaN	NaN
36.5	113.6	0.3	0.27	0.02	0.01	130	130	7.42	37	7.38	21	3.68	4	3.26	NaN	NaN	NaN	NaN	NaN	NaN	NaN	NaN	NaN	NaN	NaN	NaN	NaN	NaN	NaN	NaN	NaN	NaN	NaN	NaN	NaN	NaN	NaN
36.75	113.9	0.3	0.27	0.02	0.01	130	130	7.42	37	7.65	21	3.68	4	3.26	NaN	NaN	NaN	NaN	NaN	NaN	NaN	NaN	NaN	NaN	NaN	NaN	NaN	NaN	NaN	NaN	NaN	NaN	NaN	NaN	NaN	NaN	NaN
37	114.1	0.3	0.27	0.02	0.01	130	130	7.41	37	7.77	21	3.68	4	3.26	NaN	NaN	NaN	NaN	NaN	NaN	NaN	NaN	NaN	NaN	NaN	NaN	NaN	NaN	NaN	NaN	NaN	NaN	NaN	NaN	NaN	NaN	NaN
37.25	114.4	0.31	0.28	0.02	0.01	130	130	7.4	37	7.75	21	3.68	4	3.26	NaN	NaN	NaN	NaN	NaN	NaN	NaN	NaN	NaN	NaN	NaN	NaN	NaN	NaN	NaN	NaN	NaN	NaN	NaN	NaN	NaN	NaN	NaN
37.5	114.5	0.29	0.26	0.02	0.01	130	130	7.38	37	7.71	21	3.68	4	3.26	NaN	NaN	NaN	NaN	NaN	NaN	NaN	NaN	NaN	NaN	NaN	NaN	NaN	NaN	NaN	NaN	NaN	NaN	NaN	NaN	NaN	NaN	NaN
37.75	114.6	0.3	0.27	0.02	0.01	130	130	7.37	37	7.61	21	3.68	4	3.26	NaN	NaN	NaN	NaN	NaN	NaN	NaN	NaN	NaN	NaN	NaN	NaN	NaN	NaN	NaN	NaN	NaN	NaN	NaN	NaN	NaN	NaN	NaN
38	114.7	0.3	0.27	0.02	0.01	130	130	7.36	37	7.47	21	3.68	4	3.26	NaN	NaN	NaN	NaN	NaN	NaN	NaN	NaN	NaN	NaN	NaN	NaN	NaN	NaN	NaN	NaN	NaN	NaN	NaN	NaN	NaN	NaN	NaN
38.25	114.6	0.3	0.27	0.02	0.01	130	130	7.35	37	7.3	21	3.68	4	3.26	NaN	NaN	NaN	NaN	NaN	NaN	NaN	NaN	NaN	NaN	NaN	NaN	NaN	NaN	NaN	NaN	NaN	NaN	NaN	NaN	NaN	NaN	NaN
38.5	113.8	0.3	0.28	0.01	0	130	130	7.35	37	0.04	21	3.68	4	3.26	NaN	NaN	NaN	NaN	NaN	NaN	NaN	NaN	NaN	NaN	NaN	NaN	NaN	NaN	NaN	NaN	NaN	NaN	NaN	NaN	NaN	NaN	NaN
38.75	113.8	0.3	0.29	0	0	130	130	7.35	37	0.04	21	3.68	4	3.26	NaN	NaN	NaN	NaN	NaN	NaN	NaN	NaN	NaN	NaN	NaN	NaN	NaN	NaN	NaN	NaN	NaN	NaN	NaN	NaN	NaN	NaN	NaN
39	113.2	0.3	0.29	0	0	130	130	7.36	37	0.39	21	3.68	4	3.26	NaN	NaN	NaN	NaN	NaN	NaN	NaN	NaN	NaN	NaN	NaN	NaN	NaN	NaN	NaN	NaN	NaN	NaN	NaN	NaN	NaN	NaN	NaN
39.25	112.1	0.3	0.29	0	0	130	130	7.38	37	1	21	3.68	4	3.26	NaN	NaN	NaN	NaN	NaN	NaN	NaN	NaN	NaN	NaN	NaN	NaN	NaN	NaN	NaN	NaN	NaN	NaN	NaN	NaN	NaN	NaN	NaN
39.5	111.8	0.3	0.29	0.01	0	130	130	7.4	37	1.78	21	3.68	4	3.26	NaN	NaN	NaN	NaN	NaN	NaN	NaN	NaN	NaN	NaN	NaN	NaN	NaN	NaN	NaN	NaN	NaN	NaN	NaN	NaN	NaN	NaN	NaN
39.75	111.2	0.3	0.29	0.01	0	130	130	7.43	37	2.74	21	3.68	4	3.26	NaN	NaN	NaN	NaN	NaN	NaN	NaN	NaN	NaN	NaN	NaN	NaN	NaN	NaN	NaN	NaN	NaN	NaN	NaN	NaN	NaN	NaN	NaN
40	110.8	0.3	0.28	0.01	0	130	130	7.44	37	3.54	21	3.68	4	3.26	NaN	NaN	NaN	NaN	NaN	NaN	NaN	NaN	NaN	NaN	NaN	NaN	NaN	NaN	NaN	NaN	NaN	NaN	NaN	NaN	NaN	NaN	NaN
40.25	111.5	0.3	0.28	0.01	0	130	130	7.44	37	4.29	21	3.68	4	3.26	NaN	NaN	NaN	NaN	NaN	NaN	NaN	NaN	NaN	NaN	NaN	NaN	NaN	NaN	NaN	NaN	NaN	NaN	NaN	NaN	NaN	NaN	NaN
40.5	111.1	0.3	0.28	0.02	0	130	130	7.45	37	5.06	21	3.68	4	3.26	NaN	NaN	NaN	NaN	NaN	NaN	NaN	NaN	NaN	NaN	NaN	NaN	NaN	NaN	NaN	NaN	NaN	NaN	NaN	NaN	NaN	NaN	NaN
40.75	112	0.3	0.27	0.02	0	130	130	7.45	37	5.72	21	3.68	4	3.26	NaN	NaN	NaN	NaN	NaN	NaN	NaN	NaN	NaN	NaN	NaN	NaN	NaN	NaN	NaN	NaN	NaN	NaN	NaN	NaN	NaN	NaN	NaN
41	112.2	0.3	0.27	0.02	0	130	130	7.44	37	6.12	21	3.68	4	3.26	NaN	NaN	NaN	NaN	NaN	NaN	NaN	NaN	NaN	NaN	NaN	NaN	NaN	NaN	NaN	NaN	NaN	NaN	NaN	NaN	NaN	NaN	NaN
41.25	111.9	0.3	0.27	0.02	0.01	130	130	7.44	37	6.62	21	3.68	4	3.26	NaN	NaN	NaN	NaN	NaN	NaN	NaN	NaN	NaN	NaN	NaN	NaN	NaN	NaN	NaN	NaN	NaN	NaN	NaN	NaN	NaN	NaN	NaN
41.5	112.3	0.3	0.27	0.02	0.01	130	130	7.44	37	7.11	21	3.68	4	3.26	NaN	NaN	NaN	NaN	NaN	NaN	NaN	NaN	NaN	NaN	NaN	NaN	NaN	NaN	NaN	NaN	NaN	NaN	NaN	NaN	NaN	NaN	NaN
41.75	113.1	0.3	0.27	0.02	0.01	130	130	7.42	37	7.25	21	3.68	4	3.26	NaN	NaN	NaN	NaN	NaN	NaN	NaN	NaN	NaN	NaN	NaN	NaN	NaN	NaN	NaN	NaN	NaN	NaN	NaN	NaN	NaN	NaN	NaN
42	113.8	0.3	0.27	0.02	0.01	130	130	7.42	37	7.54	21	3.68	4	3.26	NaN	NaN	NaN	NaN	NaN	NaN	NaN	NaN	NaN	NaN	NaN	NaN	NaN	NaN	NaN	NaN	NaN	NaN	NaN	NaN	NaN	NaN	NaN
42.25	113.7	0.3	0.27	0.02	0.01	130	130	7.41	37	7.6	21	3.68	4	3.26	NaN	NaN	NaN	NaN	NaN	NaN	NaN	NaN	NaN	NaN	NaN	NaN	NaN	NaN	NaN	NaN	NaN	NaN	NaN	NaN	NaN	NaN	NaN
42.5	116	0.29	0.26	0.02	0.01	130	130	7.4	37	7.65	21	3.68	4	3.26	NaN	NaN	NaN	NaN	NaN	NaN	NaN	NaN	NaN	NaN	NaN	NaN	NaN	NaN	NaN	NaN	NaN	NaN	NaN	NaN	NaN	NaN	NaN
42.75	114.3	0.3	0.27	0.02	0.01	130	130	7.38	37	7.46	21	3.68	4	3.26	NaN	NaN	NaN	NaN	NaN	NaN	NaN	NaN	NaN	NaN	NaN	NaN	NaN	NaN	NaN	NaN	NaN	NaN	NaN	NaN	NaN	NaN	NaN
43	112.7	0.3	0.27	0.02	0.01	130	130	7.36	37	7.26	21	3.68	4	3.26	NaN	NaN	NaN	NaN	NaN	NaN	NaN	NaN	NaN	NaN	NaN	NaN	NaN	NaN	NaN	NaN	NaN	NaN	NaN	NaN	NaN	NaN	NaN
43.25	114.7	0.29	0.27	0.02	0.01	130	130	7.36	37	7.21	21	3.68	4	3.26	NaN	NaN	NaN	NaN	NaN	NaN	NaN	NaN	NaN	NaN	NaN	NaN	NaN	NaN	NaN	NaN	NaN	NaN	NaN	NaN	NaN	NaN	NaN
43.5	113.4	0.3	0.27	0.02	0	130	130	7.35	37	7.06	21	3.68	4	3.26	NaN	NaN	NaN	NaN	NaN	NaN	NaN	NaN	NaN	NaN	NaN	NaN	NaN	NaN	NaN	NaN	NaN	NaN	NaN	NaN	NaN	NaN	NaN
43.75	112	0.3	0.3	0	0	130	130	7.35	37	0.04	21	3.68	4	3.26	NaN	NaN	NaN	NaN	NaN	NaN	NaN	NaN	NaN	NaN	NaN	NaN	NaN	NaN	NaN	NaN	NaN	NaN	NaN	NaN	NaN	NaN	NaN
44	111.1	0.3	0.29	0	0	130	130	7.36	37	0.23	21	3.68	4	3.26	680	3.02	2.0536	NaN	NaN	NaN	0.07	0.00304348	NaN	102500	6.82927e-07	0.534586	185	0.48	5.376	0.990181	44.4621	0.0155987	NaN	NaN	NaN	NaN	NaN
44.25	110.5	0.3	0.29	0	0	130	130	7.38	37	0.77	21	3.68	4	3.26	NaN	NaN	NaN	NaN	NaN	NaN	NaN	NaN	NaN	NaN	NaN	NaN	NaN	NaN	NaN	NaN	NaN	NaN	NaN	NaN	NaN	NaN	NaN
44.5	110.3	0.3	0.29	0	0	130	130	7.4	37	1.5	21	3.68	4	3.26	NaN	NaN	NaN	NaN	NaN	NaN	NaN	NaN	NaN	NaN	NaN	NaN	NaN	NaN	NaN	NaN	NaN	NaN	NaN	NaN	NaN	NaN	NaN
44.75	110.2	0.3	0.29	0.01	0	130	130	7.42	37	2.41	21	3.68	4	3.26	NaN	NaN	NaN	1.386	3	4.00124	NaN	NaN	NaN	NaN	NaN	NaN	NaN	NaN	NaN	NaN	NaN	NaN	NaN	NaN	NaN	NaN	NaN
45	112.2	0.3	0.28	0.01	0	130	130	7.43	37	3.25	21	3.68	4	3.26	NaN	NaN	NaN	NaN	NaN	NaN	NaN	NaN	NaN	NaN	NaN	NaN	NaN	NaN	NaN	NaN	NaN	NaN	NaN	NaN	NaN	NaN	NaN
45.25	112.5	0.3	0.28	0.01	0	130	130	7.44	37	4.08	21	3.68	4	3.26	NaN	NaN	NaN	NaN	NaN	NaN	NaN	NaN	NaN	NaN	NaN	NaN	NaN	NaN	NaN	NaN	NaN	NaN	NaN	NaN	NaN	NaN	NaN
45.5	111.6	0.3	0.28	0.01	0	130	130	7.45	37	4.78	21	3.68	4	3.26	NaN	NaN	NaN	NaN	NaN	NaN	NaN	NaN	NaN	NaN	NaN	NaN	NaN	NaN	NaN	NaN	NaN	NaN	NaN	NaN	NaN	NaN	NaN
45.75	110.8	0.3	0.28	0.02	0	130	130	7.45	37	5.39	21	3.68	4	3.26	NaN	NaN	NaN	NaN	NaN	NaN	NaN	NaN	NaN	NaN	NaN	NaN	NaN	NaN	NaN	NaN	NaN	NaN	NaN	NaN	NaN	NaN	NaN
46	111.7	0.3	0.27	0.02	0	130	130	7.44	37	5.69	21	3.68	4	3.26	NaN	NaN	NaN	NaN	NaN	NaN	NaN	NaN	NaN	NaN	NaN	NaN	NaN	NaN	NaN	NaN	NaN	NaN	NaN	NaN	NaN	NaN	NaN
46.25	111	0.3	0.27	0.02	0	130	130	7.43	37	6.07	21	3.68	4	3.26	NaN	NaN	NaN	NaN	NaN	NaN	NaN	NaN	NaN	NaN	NaN	NaN	NaN	NaN	NaN	NaN	NaN	NaN	NaN	NaN	NaN	NaN	NaN
46.5	115.2	0.3	0.27	0.02	0.01	130	130	7.43	37	6.6	21	3.68	4	3.26	NaN	NaN	NaN	NaN	NaN	NaN	NaN	NaN	NaN	NaN	NaN	NaN	NaN	NaN	NaN	NaN	NaN	NaN	NaN	NaN	NaN	NaN	NaN
46.75	114.2	0.3	0.27	0.02	0.01	130	130	7.42	37	6.83	21	3.68	4	3.26	NaN	NaN	NaN	NaN	NaN	NaN	NaN	NaN	NaN	NaN	NaN	NaN	NaN	NaN	NaN	NaN	NaN	NaN	NaN	NaN	NaN	NaN	NaN
47	112.8	0.29	0.26	0.02	0.01	130	130	7.41	37	6.89	21	3.68	4	3.26	NaN	NaN	NaN	NaN	NaN	NaN	NaN	NaN	NaN	NaN	NaN	NaN	NaN	NaN	NaN	NaN	NaN	NaN	NaN	NaN	NaN	NaN	NaN
47.25	111.2	0.3	0.27	0.02	0.01	130	130	7.39	37	6.86	21	3.68	4	3.26	NaN	NaN	NaN	NaN	NaN	NaN	NaN	NaN	NaN	NaN	NaN	NaN	NaN	NaN	NaN	NaN	NaN	NaN	NaN	NaN	NaN	NaN	NaN
47.5	115.6	0.3	0.27	0.02	0.01	130	130	7.39	37	7.01	21	3.68	4	3.26	NaN	NaN	NaN	NaN	NaN	NaN	NaN	NaN	NaN	NaN	NaN	NaN	NaN	NaN	NaN	NaN	NaN	NaN	NaN	NaN	NaN	NaN	NaN
47.75	114.6	0.3	0.27	0.02	0.01	130	130	7.38	37	6.93	21	3.68	4	3.26	NaN	NaN	NaN	NaN	NaN	NaN	NaN	NaN	NaN	NaN	NaN	NaN	NaN	NaN	NaN	NaN	NaN	NaN	NaN	NaN	NaN	NaN	NaN
48	113.1	0.3	0.27	0.02	0.01	130	130	7.37	37	6.75	21	3.68	4	3.26	NaN	NaN	NaN	NaN	NaN	NaN	NaN	NaN	NaN	NaN	NaN	NaN	NaN	NaN	NaN	NaN	NaN	NaN	NaN	NaN	NaN	NaN	NaN
48.25	111.3	0.3	0.28	0.01	0	130	130	7.35	37	0.04	21	3.68	4	3.26	NaN	NaN	NaN	NaN	NaN	NaN	NaN	NaN	NaN	NaN	NaN	NaN	NaN	NaN	NaN	NaN	NaN	NaN	NaN	NaN	NaN	NaN	NaN
48.5	110.3	0.3	0.3	0	0	130	130	7.35	37	0.11	21	3.68	4	3.26	NaN	NaN	NaN	NaN	NaN	NaN	NaN	NaN	NaN	NaN	NaN	NaN	NaN	NaN	NaN	NaN	NaN	NaN	NaN	NaN	NaN	NaN	NaN
48.75	109.8	0.3	0.29	0	0	130	130	7.37	37	0.47	21	3.68	4	3.26	NaN	NaN	NaN	NaN	NaN	NaN	NaN	NaN	NaN	NaN	NaN	NaN	NaN	NaN	NaN	NaN	NaN	NaN	NaN	NaN	NaN	NaN	NaN
49	109.4	0.3	0.29	0	0	130	130	7.38	37	1.09	21	3.68	4	3.26	NaN	NaN	NaN	NaN	NaN	NaN	NaN	NaN	NaN	NaN	NaN	NaN	NaN	NaN	NaN	NaN	NaN	NaN	NaN	NaN	NaN	NaN	NaN
49.25	109	0	0	0	0	70	130	7.4	36.9	0	0	3.68	4	3.26	NaN	NaN	NaN	NaN	NaN	NaN	NaN	NaN	NaN	NaN	NaN	NaN	NaN	NaN	NaN	NaN	NaN	NaN	NaN	NaN	NaN	NaN	NaN
49.5	108.5	0	0	0	0	70	130	7.41	36.3	0	0	3.68	4	3.26	NaN	NaN	NaN	NaN	NaN	NaN	NaN	NaN	NaN	NaN	NaN	NaN	NaN	NaN	NaN	NaN	NaN	NaN	NaN	NaN	NaN	NaN	NaN
49.75	116.9	0.3	0.28	0.01	0	130	130	7.46	38.3	4.23	21	3.68	4	3.26	NaN	NaN	NaN	NaN	NaN	NaN	NaN	NaN	NaN	NaN	NaN	NaN	NaN	NaN	NaN	NaN	NaN	NaN	NaN	NaN	NaN	NaN	NaN
50	114.7	0.3	0.28	0.02	0	130	130	7.49	37.7	5.57	21	3.68	4	3.26	NaN	NaN	NaN	NaN	NaN	NaN	NaN	NaN	NaN	NaN	NaN	NaN	NaN	NaN	NaN	NaN	NaN	NaN	NaN	NaN	NaN	NaN	NaN
50.25	111.8	0.3	0.27	0.02	0.01	130	130	7.5	35.3	6.89	21	3.68	4	3.26	NaN	NaN	NaN	NaN	NaN	NaN	NaN	NaN	NaN	NaN	NaN	NaN	NaN	NaN	NaN	NaN	NaN	NaN	NaN	NaN	NaN	NaN	NaN
50.5	111.2	0.3	0.27	0.02	0.01	130	130	7.48	38.4	7.2	21	3.68	4	3.26	NaN	NaN	NaN	NaN	NaN	NaN	NaN	NaN	NaN	NaN	NaN	NaN	NaN	NaN	NaN	NaN	NaN	NaN	NaN	NaN	NaN	NaN	NaN
50.75	111.8	0.3	0.27	0.02	0.01	130	130	7.48	36.9	8.05	21	3.68	4	3.26	NaN	NaN	NaN	NaN	NaN	NaN	NaN	NaN	NaN	NaN	NaN	NaN	NaN	NaN	NaN	NaN	NaN	NaN	NaN	NaN	NaN	NaN	NaN
51	110.6	0.3	0.27	0.03	0.01	130	130	7.48	35.8	8.69	21	3.68	4	3.26	NaN	NaN	NaN	NaN	NaN	NaN	NaN	NaN	NaN	NaN	NaN	NaN	NaN	NaN	NaN	NaN	NaN	NaN	NaN	NaN	NaN	NaN	NaN
51.25	111	0.3	0.26	0.03	0.01	130	130	7.45	38.2	8.58	21	3.68	4	3.26	NaN	NaN	NaN	NaN	NaN	NaN	NaN	NaN	NaN	NaN	NaN	NaN	NaN	NaN	NaN	NaN	NaN	NaN	NaN	NaN	NaN	NaN	NaN
51.5	111.7	0.3	0.26	0.03	0.01	130	130	7.43	36.9	8.89	21	3.68	4	3.26	NaN	NaN	NaN	NaN	NaN	NaN	NaN	NaN	NaN	NaN	NaN	NaN	NaN	NaN	NaN	NaN	NaN	NaN	NaN	NaN	NaN	NaN	NaN
51.75	110.9	0.3	0.26	0.03	0.01	130	130	7.42	36.1	9.11	21	3.68	4	3.26	NaN	NaN	NaN	NaN	NaN	NaN	NaN	NaN	NaN	NaN	NaN	NaN	NaN	NaN	NaN	NaN	NaN	NaN	NaN	NaN	NaN	NaN	NaN
52	111.9	0.3	0.26	0.03	0.01	130	130	7.4	38	8.77	21	3.68	4	3.26	NaN	NaN	NaN	NaN	NaN	NaN	NaN	NaN	NaN	NaN	NaN	NaN	NaN	NaN	NaN	NaN	NaN	NaN	NaN	NaN	NaN	NaN	NaN
52.25	112.3	0.3	0.26	0.03	0.01	130	130	7.39	36.9	8.83	21	3.68	4	3.26	NaN	NaN	NaN	NaN	NaN	NaN	NaN	NaN	NaN	NaN	NaN	NaN	NaN	NaN	NaN	NaN	NaN	NaN	NaN	NaN	NaN	NaN	NaN
52.5	112	0.3	0.26	0.03	0.01	130	130	7.37	36.2	8.73	21	3.68	4	3.26	NaN	NaN	NaN	NaN	NaN	NaN	NaN	NaN	NaN	NaN	NaN	NaN	NaN	NaN	NaN	NaN	NaN	NaN	NaN	NaN	NaN	NaN	NaN
52.75	112.6	0.3	0.26	0.02	0.01	130	130	7.35	37.8	8.35	21	3.68	4	3.26	NaN	NaN	NaN	NaN	NaN	NaN	NaN	NaN	NaN	NaN	NaN	NaN	NaN	NaN	NaN	NaN	NaN	NaN	NaN	NaN	NaN	NaN	NaN
53	112.5	0.3	0.3	0	0	130	130	7.35	37.1	0.04	21	3.68	4	3.26	NaN	NaN	NaN	NaN	NaN	NaN	NaN	NaN	NaN	NaN	NaN	NaN	NaN	NaN	NaN	NaN	NaN	NaN	NaN	NaN	NaN	NaN	NaN
53.25	111	0.3	0.3	0	0	130	130	7.36	36.1	0.25	21	3.68	4	3.26	NaN	NaN	NaN	NaN	NaN	NaN	NaN	NaN	NaN	NaN	NaN	NaN	NaN	NaN	NaN	NaN	NaN	NaN	NaN	NaN	NaN	NaN	NaN
53.5	110.6	0.3	0.29	0	0	130	130	7.37	37.6	0.54	21	3.68	4	3.26	NaN	NaN	NaN	NaN	NaN	NaN	NaN	NaN	NaN	NaN	NaN	NaN	NaN	NaN	NaN	NaN	NaN	NaN	NaN	NaN	NaN	NaN	NaN
53.75	110.3	0.3	0.29	0	0	130	130	7.39	37.4	1.2	21	3.68	4	3.26	NaN	NaN	NaN	NaN	NaN	NaN	NaN	NaN	NaN	NaN	NaN	NaN	NaN	NaN	NaN	NaN	NaN	NaN	NaN	NaN	NaN	NaN	NaN
54	108.7	0.3	0.29	0.01	0	130	130	7.41	36.1	2.2	21	3.68	4	3.26	NaN	NaN	NaN	NaN	NaN	NaN	NaN	NaN	NaN	NaN	NaN	NaN	NaN	NaN	NaN	NaN	NaN	NaN	NaN	NaN	NaN	NaN	NaN
54.25	108.7	0.3	0.29	0.01	0	130	130	7.43	37.3	3.04	21	3.68	4	3.26	NaN	NaN	NaN	NaN	NaN	NaN	NaN	NaN	NaN	NaN	NaN	NaN	NaN	NaN	NaN	NaN	NaN	NaN	NaN	NaN	NaN	NaN	NaN
54.5	109.6	0.3	0.28	0.01	0	130	130	7.43	37.8	3.51	21	3.68	4	3.26	NaN	NaN	NaN	NaN	NaN	NaN	NaN	NaN	NaN	NaN	NaN	NaN	NaN	NaN	NaN	NaN	NaN	NaN	NaN	NaN	NaN	NaN	NaN
54.75	108.6	0.3	0.28	0.01	0	130	130	7.45	36.2	4.63	21	3.68	4	3.26	NaN	NaN	NaN	NaN	NaN	NaN	NaN	NaN	NaN	NaN	NaN	NaN	NaN	NaN	NaN	NaN	NaN	NaN	NaN	NaN	NaN	NaN	NaN
55	109.3	0.3	0.28	0.01	0	130	130	7.44	37	5.07	21	3.68	4	3.26	NaN	NaN	NaN	NaN	NaN	NaN	NaN	NaN	NaN	NaN	NaN	NaN	NaN	NaN	NaN	NaN	NaN	NaN	NaN	NaN	NaN	NaN	NaN
55.25	109.4	0.3	0.27	0.02	0	130	130	7.45	37.8	5.77	21	3.68	4	3.26	NaN	NaN	NaN	NaN	NaN	NaN	NaN	NaN	NaN	NaN	NaN	NaN	NaN	NaN	NaN	NaN	NaN	NaN	NaN	NaN	NaN	NaN	NaN
55.5	109.5	0.3	0.27	0.02	0.01	130	130	7.45	36.5	6.39	21	3.68	4	3.26	NaN	NaN	NaN	NaN	NaN	NaN	NaN	NaN	NaN	NaN	NaN	NaN	NaN	NaN	NaN	NaN	NaN	NaN	NaN	NaN	NaN	NaN	NaN
55.75	109.8	0.3	0.27	0.02	0.01	130	130	7.44	36.6	6.74	21	3.68	4	3.26	NaN	NaN	NaN	NaN	NaN	NaN	NaN	NaN	NaN	NaN	NaN	NaN	NaN	NaN	NaN	NaN	NaN	NaN	NaN	NaN	NaN	NaN	NaN
56	109.7	0.3	0.27	0.02	0.01	130	130	7.43	37.7	6.94	21	3.68	4	3.26	NaN	NaN	NaN	NaN	NaN	NaN	NaN	NaN	NaN	NaN	NaN	NaN	NaN	NaN	NaN	NaN	NaN	NaN	NaN	NaN	NaN	NaN	NaN
56.25	110.6	0.3	0.27	0.02	0.01	130	130	7.42	37.1	7.31	21	3.68	4	3.26	NaN	NaN	NaN	NaN	NaN	NaN	NaN	NaN	NaN	NaN	NaN	NaN	NaN	NaN	NaN	NaN	NaN	NaN	NaN	NaN	NaN	NaN	NaN
56.5	109.6	0.3	0.27	0.02	0.01	130	130	7.41	36.3	7.48	21	3.68	4	3.26	NaN	NaN	NaN	NaN	NaN	NaN	NaN	NaN	NaN	NaN	NaN	NaN	NaN	NaN	NaN	NaN	NaN	NaN	NaN	NaN	NaN	NaN	NaN
56.75	110.1	0.3	0.27	0.02	0.01	130	130	7.4	37.3	7.47	21	3.68	4	3.26	NaN	NaN	NaN	NaN	NaN	NaN	NaN	NaN	NaN	NaN	NaN	NaN	NaN	NaN	NaN	NaN	NaN	NaN	NaN	NaN	NaN	NaN	NaN
57	110.3	0.3	0.27	0.02	0.01	130	130	7.39	37.6	7.51	21	3.68	4	3.26	NaN	NaN	NaN	NaN	NaN	NaN	NaN	NaN	NaN	NaN	NaN	NaN	NaN	NaN	NaN	NaN	NaN	NaN	NaN	NaN	NaN	NaN	NaN
57.25	110.2	0.3	0.27	0.02	0.01	130	130	7.38	36.6	7.62	21	3.68	4	3.26	NaN	NaN	NaN	NaN	NaN	NaN	NaN	NaN	NaN	NaN	NaN	NaN	NaN	NaN	NaN	NaN	NaN	NaN	NaN	NaN	NaN	NaN	NaN
57.5	110.4	0.3	0.27	0.02	0.01	130	130	7.38	36.6	7.61	21	3.68	4	3.26	NaN	NaN	NaN	NaN	NaN	NaN	NaN	NaN	NaN	NaN	NaN	NaN	NaN	NaN	NaN	NaN	NaN	NaN	NaN	NaN	NaN	NaN	NaN
57.75	110.9	0.3	0.27	0.02	0.01	130	130	7.36	37.5	7.35	21	3.68	4	3.26	NaN	NaN	NaN	NaN	NaN	NaN	NaN	NaN	NaN	NaN	NaN	NaN	NaN	NaN	NaN	NaN	NaN	NaN	NaN	NaN	NaN	NaN	NaN
58	111	0.3	0.27	0.02	0.01	130	130	7.35	37.3	7.17	21	3.68	4	3.26	NaN	NaN	NaN	NaN	NaN	NaN	NaN	NaN	NaN	NaN	NaN	NaN	NaN	NaN	NaN	NaN	NaN	NaN	NaN	NaN	NaN	NaN	NaN
58.25	110.8	0.3	0.3	0	0	130	130	7.35	36.5	0.04	21	3.68	4	3.26	NaN	NaN	NaN	NaN	NaN	NaN	NaN	NaN	NaN	NaN	NaN	NaN	NaN	NaN	NaN	NaN	NaN	NaN	NaN	NaN	NaN	NaN	NaN
58.5	109.8	0.3	0.3	0	0	130	130	7.35	36.8	0.13	21	3.68	4	3.26	NaN	NaN	NaN	NaN	NaN	NaN	NaN	NaN	NaN	NaN	NaN	NaN	NaN	NaN	NaN	NaN	NaN	NaN	NaN	NaN	NaN	NaN	NaN
58.75	108.9	0.3	0.29	0	0	130	130	7.37	37.4	0.52	21	3.68	4	3.26	NaN	NaN	NaN	NaN	NaN	NaN	NaN	NaN	NaN	NaN	NaN	NaN	NaN	NaN	NaN	NaN	NaN	NaN	NaN	NaN	NaN	NaN	NaN
59	108.5	0.3	0.29	0	0	130	130	7.39	37.1	1.19	21	3.68	4	3.26	NaN	NaN	NaN	NaN	NaN	NaN	NaN	NaN	NaN	NaN	NaN	NaN	NaN	NaN	NaN	NaN	NaN	NaN	NaN	NaN	NaN	NaN	NaN
59.25	107.6	0.3	0.29	0.01	0	130	130	7.41	36.6	2.06	21	3.68	4	3.26	NaN	NaN	NaN	NaN	NaN	NaN	NaN	NaN	NaN	NaN	NaN	NaN	NaN	NaN	NaN	NaN	NaN	NaN	NaN	NaN	NaN	NaN	NaN
59.5	107.4	0.3	0.28	0.01	0	130	130	7.43	36.9	2.96	21	3.68	4	3.26	NaN	NaN	NaN	NaN	NaN	NaN	NaN	NaN	NaN	NaN	NaN	NaN	NaN	NaN	NaN	NaN	NaN	NaN	NaN	NaN	NaN	NaN	NaN
59.75	107.9	0.3	0.28	0.01	0	130	130	7.43	37.3	3.43	21	3.68	4	3.26	NaN	NaN	NaN	NaN	NaN	NaN	NaN	NaN	NaN	NaN	NaN	NaN	NaN	NaN	NaN	NaN	NaN	NaN	NaN	NaN	NaN	NaN	NaN
60	107.7	0.3	0.28	0.01	0	130	130	7.44	37	4.28	21	3.68	4	3.26	NaN	NaN	NaN	NaN	NaN	NaN	NaN	NaN	NaN	NaN	NaN	NaN	NaN	NaN	NaN	NaN	NaN	NaN	NaN	NaN	NaN	NaN	NaN
60.25	107.4	0.3	0.28	0.01	0	130	130	7.44	36.7	4.87	21	3.68	4	3.26	NaN	NaN	NaN	NaN	NaN	NaN	NaN	NaN	NaN	NaN	NaN	NaN	NaN	NaN	NaN	NaN	NaN	NaN	NaN	NaN	NaN	NaN	NaN
60.5	107.6	0.3	0.28	0.02	0	130	130	7.45	37	5.57	21	3.68	4	3.26	NaN	NaN	NaN	NaN	NaN	NaN	NaN	NaN	NaN	NaN	NaN	NaN	NaN	NaN	NaN	NaN	NaN	NaN	NaN	NaN	NaN	NaN	NaN
60.75	108.5	0.3	0.27	0.02	0	130	130	7.44	37.2	5.89	21	3.68	4	3.26	NaN	NaN	NaN	NaN	NaN	NaN	NaN	NaN	NaN	NaN	NaN	NaN	NaN	NaN	NaN	NaN	NaN	NaN	NaN	NaN	NaN	NaN	NaN
61	108	0.3	0.27	0.02	0	130	130	7.43	37	6.3	21	3.68	4	3.26	NaN	NaN	NaN	NaN	NaN	NaN	NaN	NaN	NaN	NaN	NaN	NaN	NaN	NaN	NaN	NaN	NaN	NaN	NaN	NaN	NaN	NaN	NaN
61.25	108.3	0.31	0.28	0.02	0.01	130	130	7.43	36.8	6.71	21	3.68	4	3.26	NaN	NaN	NaN	NaN	NaN	NaN	NaN	NaN	NaN	NaN	NaN	NaN	NaN	NaN	NaN	NaN	NaN	NaN	NaN	NaN	NaN	NaN	NaN
61.5	108.5	0.3	0.27	0.02	0.01	130	130	7.42	37	6.91	21	3.68	4	3.26	NaN	NaN	NaN	NaN	NaN	NaN	NaN	NaN	NaN	NaN	NaN	NaN	NaN	NaN	NaN	NaN	NaN	NaN	NaN	NaN	NaN	NaN	NaN
61.75	109.1	0.3	0.27	0.02	0.01	130	130	7.4	37.2	6.93	21	3.68	4	3.26	NaN	NaN	NaN	NaN	NaN	NaN	NaN	NaN	NaN	NaN	NaN	NaN	NaN	NaN	NaN	NaN	NaN	NaN	NaN	NaN	NaN	NaN	NaN
62	109.1	0.3	0.27	0.02	0.01	130	130	7.39	37	6.98	21	3.68	4	3.26	NaN	NaN	NaN	NaN	NaN	NaN	NaN	NaN	NaN	NaN	NaN	NaN	NaN	NaN	NaN	NaN	NaN	NaN	NaN	NaN	NaN	NaN	NaN
62.25	108.9	0.3	0.27	0.02	0.01	130	130	7.38	36.9	6.98	21	3.68	4	3.26	NaN	NaN	NaN	NaN	NaN	NaN	NaN	NaN	NaN	NaN	NaN	NaN	NaN	NaN	NaN	NaN	NaN	NaN	NaN	NaN	NaN	NaN	NaN
62.5	108.8	0.3	0.27	0.02	0.01	130	130	7.38	37	6.94	21	3.68	4	3.26	NaN	NaN	NaN	NaN	NaN	NaN	NaN	NaN	NaN	NaN	NaN	NaN	NaN	NaN	NaN	NaN	NaN	NaN	NaN	NaN	NaN	NaN	NaN
62.75	108.9	0.3	0.27	0.02	0.01	130	130	7.37	37.1	6.95	21	3.68	4	3.26	NaN	NaN	NaN	NaN	NaN	NaN	NaN	NaN	NaN	NaN	NaN	NaN	NaN	NaN	NaN	NaN	NaN	NaN	NaN	NaN	NaN	NaN	NaN
63	108.9	0.3	0.27	0.02	0.01	130	130	7.36	37.1	6.81	21	3.68	4	3.26	NaN	NaN	NaN	NaN	NaN	NaN	NaN	NaN	NaN	NaN	NaN	NaN	NaN	NaN	NaN	NaN	NaN	NaN	NaN	NaN	NaN	NaN	NaN
63.25	109.1	0.3	0.3	0	0	130	130	7.35	36.9	0.04	21	3.68	4	3.26	NaN	NaN	NaN	NaN	NaN	NaN	NaN	NaN	NaN	NaN	NaN	NaN	NaN	NaN	NaN	NaN	NaN	NaN	NaN	NaN	NaN	NaN	NaN
63.5	108.4	0.3	0.3	0	0	130	130	7.36	36.9	0.24	21	3.68	4	3.26	NaN	NaN	NaN	NaN	NaN	NaN	NaN	NaN	NaN	NaN	NaN	NaN	NaN	NaN	NaN	NaN	NaN	NaN	NaN	NaN	NaN	NaN	NaN
63.75	107.5	0.3	0.29	0	0	130	130	7.37	37	0.67	21	3.68	4	3.26	NaN	NaN	NaN	NaN	NaN	NaN	NaN	NaN	NaN	NaN	NaN	NaN	NaN	NaN	NaN	NaN	NaN	NaN	NaN	NaN	NaN	NaN	NaN
64	107	0.3	0.29	0	0	130	130	7.39	37.1	1.3	21	3.68	4	3.26	NaN	NaN	NaN	NaN	NaN	NaN	NaN	NaN	NaN	NaN	NaN	NaN	NaN	NaN	NaN	NaN	NaN	NaN	NaN	NaN	NaN	NaN	NaN
64.25	106.7	0.3	0.29	0.01	0	130	130	7.41	37	2.09	21	3.68	4	3.26	NaN	NaN	NaN	NaN	NaN	NaN	NaN	NaN	NaN	NaN	NaN	NaN	NaN	NaN	NaN	NaN	NaN	NaN	NaN	NaN	NaN	NaN	NaN
64.5	106	0.3	0.29	0.01	0	130	130	7.42	36.9	2.69	21	3.68	4	3.26	NaN	NaN	NaN	NaN	NaN	NaN	NaN	NaN	NaN	NaN	NaN	NaN	NaN	NaN	NaN	NaN	NaN	NaN	NaN	NaN	NaN	NaN	NaN
64.75	106.8	0.3	0.28	0.01	0	130	130	7.42	37	3.27	21	3.68	4	3.26	NaN	NaN	NaN	NaN	NaN	NaN	NaN	NaN	NaN	NaN	NaN	NaN	NaN	NaN	NaN	NaN	NaN	NaN	NaN	NaN	NaN	NaN	NaN
65	106.5	0.3	0.28	0.01	0	130	130	7.44	37.1	4.07	21	3.68	4	3.26	NaN	NaN	NaN	NaN	NaN	NaN	NaN	NaN	NaN	NaN	NaN	NaN	NaN	NaN	NaN	NaN	NaN	NaN	NaN	NaN	NaN	NaN	NaN
65.25	106.6	0.3	0.28	0.01	0	130	130	7.43	37	4.45	21	3.68	4	3.26	NaN	NaN	NaN	NaN	NaN	NaN	NaN	NaN	NaN	NaN	NaN	NaN	NaN	NaN	NaN	NaN	NaN	NaN	NaN	NaN	NaN	NaN	NaN
65.5	106.7	0.3	0.28	0.02	0	130	130	7.43	37	5.11	21	3.68	4	3.26	NaN	NaN	NaN	NaN	NaN	NaN	NaN	NaN	NaN	NaN	NaN	NaN	NaN	NaN	NaN	NaN	NaN	NaN	NaN	NaN	NaN	NaN	NaN
65.75	107.5	0.3	0.28	0.02	0	130	130	7.43	37	5.48	21	3.68	4	3.26	NaN	NaN	NaN	NaN	NaN	NaN	NaN	NaN	NaN	NaN	NaN	NaN	NaN	NaN	NaN	NaN	NaN	NaN	NaN	NaN	NaN	NaN	NaN
66	108.6	0.3	0.27	0.02	0	130	130	7.43	37	5.94	21	3.68	4	3.26	NaN	NaN	NaN	NaN	NaN	NaN	NaN	NaN	NaN	NaN	NaN	NaN	NaN	NaN	NaN	NaN	NaN	NaN	NaN	NaN	NaN	NaN	NaN
66.25	107.4	0.3	0.27	0.02	0	130	130	7.42	37	6.18	21	3.68	4	3.26	NaN	NaN	NaN	NaN	NaN	NaN	NaN	NaN	NaN	NaN	NaN	NaN	NaN	NaN	NaN	NaN	NaN	NaN	NaN	NaN	NaN	NaN	NaN
66.5	106.7	0.3	0.27	0.02	0	130	130	7.41	37	6.26	21	3.68	4	3.26	NaN	NaN	NaN	NaN	NaN	NaN	NaN	NaN	NaN	NaN	NaN	NaN	NaN	NaN	NaN	NaN	NaN	NaN	NaN	NaN	NaN	NaN	NaN
66.75	109.5	0.3	0.27	0.02	0.01	130	130	7.4	37	6.43	21	3.68	4	3.26	NaN	NaN	NaN	NaN	NaN	NaN	NaN	NaN	NaN	NaN	NaN	NaN	NaN	NaN	NaN	NaN	NaN	NaN	NaN	NaN	NaN	NaN	NaN
67	108.1	0.3	0.27	0.02	0.01	130	130	7.39	37	6.52	21	3.68	4	3.26	NaN	NaN	NaN	NaN	NaN	NaN	NaN	NaN	NaN	NaN	NaN	NaN	NaN	NaN	NaN	NaN	NaN	NaN	NaN	NaN	NaN	NaN	NaN
67.25	107.2	0.3	0.27	0.02	0.01	130	130	7.38	37	6.31	21	3.68	4	3.26	NaN	NaN	NaN	NaN	NaN	NaN	NaN	NaN	NaN	NaN	NaN	NaN	NaN	NaN	NaN	NaN	NaN	NaN	NaN	NaN	NaN	NaN	NaN
67.5	109.3	0.3	0.27	0.02	0	130	130	7.37	37	6.26	21	3.68	4	3.26	NaN	NaN	NaN	NaN	NaN	NaN	NaN	NaN	NaN	NaN	NaN	NaN	NaN	NaN	NaN	NaN	NaN	NaN	NaN	NaN	NaN	NaN	NaN
67.75	108.3	0.3	0.28	0.02	0	130	130	7.36	37	6.16	21	3.68	4	3.26	NaN	NaN	NaN	NaN	NaN	NaN	NaN	NaN	NaN	NaN	NaN	NaN	NaN	NaN	NaN	NaN	NaN	NaN	NaN	NaN	NaN	NaN	NaN
68	107.1	0.3	0.27	0.02	0	130	130	7.35	37	5.99	21	3.68	4	3.26	NaN	NaN	NaN	NaN	NaN	NaN	NaN	NaN	NaN	NaN	NaN	NaN	NaN	NaN	NaN	NaN	NaN	NaN	NaN	NaN	NaN	NaN	NaN
68.25	105.9	0.3	0.3	0	0	130	130	7.34	37	0.04	21	3.68	4	3.26	NaN	NaN	NaN	NaN	NaN	NaN	NaN	NaN	NaN	NaN	NaN	NaN	NaN	NaN	NaN	NaN	NaN	NaN	NaN	NaN	NaN	NaN	NaN
68.5	104.8	0.3	0.3	0	0	130	130	7.35	37	0.05	21	3.68	4	3.26	NaN	NaN	NaN	NaN	NaN	NaN	NaN	NaN	NaN	NaN	NaN	NaN	NaN	NaN	NaN	NaN	NaN	NaN	NaN	NaN	NaN	NaN	NaN
68.75	104.6	0.3	0.29	0	0	130	130	7.36	37	0.4	21	3.68	4	3.26	NaN	NaN	NaN	NaN	NaN	NaN	NaN	NaN	NaN	NaN	NaN	NaN	NaN	NaN	NaN	NaN	NaN	NaN	NaN	NaN	NaN	NaN	NaN
69	104.4	0.3	0.29	0	0	130	130	7.38	37	0.94	21	3.68	4	3.26	NaN	NaN	NaN	NaN	NaN	NaN	NaN	NaN	NaN	NaN	NaN	NaN	NaN	NaN	NaN	NaN	NaN	NaN	NaN	NaN	NaN	NaN	NaN
69.25	104.1	0.3	0.29	0	0	130	130	7.4	37	1.66	21	3.68	4	3.26	NaN	NaN	NaN	NaN	NaN	NaN	NaN	NaN	NaN	NaN	NaN	NaN	NaN	NaN	NaN	NaN	NaN	NaN	NaN	NaN	NaN	NaN	NaN
69.5	104.2	0.3	0.29	0.01	0	130	130	7.42	37	2.46	21	3.68	4	3.26	NaN	NaN	NaN	NaN	NaN	NaN	NaN	NaN	NaN	NaN	NaN	NaN	NaN	NaN	NaN	NaN	NaN	NaN	NaN	NaN	NaN	NaN	NaN
69.75	108.3	0.3	0.28	0.01	0	130	130	7.43	37	3.25	21	3.68	4	3.26	NaN	NaN	NaN	NaN	NaN	NaN	NaN	NaN	NaN	NaN	NaN	NaN	NaN	NaN	NaN	NaN	NaN	NaN	NaN	NaN	NaN	NaN	NaN
70	107.4	0.3	0.28	0.01	0	130	130	7.43	37	3.87	21	3.68	4	3.26	NaN	NaN	NaN	NaN	NaN	NaN	NaN	NaN	NaN	NaN	NaN	NaN	NaN	NaN	NaN	NaN	NaN	NaN	NaN	NaN	NaN	NaN	NaN
70.25	106.3	0.3	0.28	0.01	0	130	130	7.43	37	4.34	21	3.68	4	3.26	NaN	NaN	NaN	NaN	NaN	NaN	NaN	NaN	NaN	NaN	NaN	NaN	NaN	NaN	NaN	NaN	NaN	NaN	NaN	NaN	NaN	NaN	NaN
70.5	105.6	0.3	0.28	0.01	0	130	130	7.43	37	4.69	21	3.68	4	3.26	NaN	NaN	NaN	NaN	NaN	NaN	NaN	NaN	NaN	NaN	NaN	NaN	NaN	NaN	NaN	NaN	NaN	NaN	NaN	NaN	NaN	NaN	NaN
70.75	104.5	0.3	0.28	0.01	0	130	130	7.42	37	4.95	21	3.68	4	3.26	NaN	NaN	NaN	NaN	NaN	NaN	NaN	NaN	NaN	NaN	NaN	NaN	NaN	NaN	NaN	NaN	NaN	NaN	NaN	NaN	NaN	NaN	NaN
71	107.9	0.3	0.28	0.02	0	130	130	7.42	37	5.32	21	3.68	4	3.26	NaN	NaN	NaN	NaN	NaN	NaN	NaN	NaN	NaN	NaN	NaN	NaN	NaN	NaN	NaN	NaN	NaN	NaN	NaN	NaN	NaN	NaN	NaN
71.25	107.5	0.3	0.28	0.02	0	130	130	7.41	37	5.56	21	3.68	4	3.26	NaN	NaN	NaN	NaN	NaN	NaN	NaN	NaN	NaN	NaN	NaN	NaN	NaN	NaN	NaN	NaN	NaN	NaN	NaN	NaN	NaN	NaN	NaN
71.5	106.3	0.3	0.28	0.02	0	130	130	7.4	37	5.55	21	3.68	4	3.26	NaN	NaN	NaN	NaN	NaN	NaN	NaN	NaN	NaN	NaN	NaN	NaN	NaN	NaN	NaN	NaN	NaN	NaN	NaN	NaN	NaN	NaN	NaN
71.75	105.3	0.3	0.27	0.02	0	130	130	7.39	37	5.53	21	3.68	4	3.26	NaN	NaN	NaN	NaN	NaN	NaN	NaN	NaN	NaN	NaN	NaN	NaN	NaN	NaN	NaN	NaN	NaN	NaN	NaN	NaN	NaN	NaN	NaN
72	104.5	0.3	0.28	0.02	0	130	130	7.37	37	5.48	21	3.68	4	3.26	670	3.2	2.144	0	2	3.2	0.801235	0.0286155	NaN	167500	4.78349e-06	1.33582	190	0.79	8.848	1.69872	42.4095	0.0163536	NaN	NaN	NaN	NaN	NaN
72.25	105.3	0.3	0.28	0.02	0	130	130	7.37	37	5.4	21	3.68	4	3.26	NaN	NaN	NaN	NaN	NaN	NaN	NaN	NaN	NaN	NaN	NaN	NaN	NaN	NaN	NaN	NaN	NaN	NaN	NaN	NaN	NaN	NaN	NaN
72.5	105.5	0.3	0.28	0.02	0	130	130	7.36	37	5.19	21	3.68	4	3.26	NaN	NaN	NaN	NaN	NaN	NaN	NaN	NaN	NaN	NaN	NaN	NaN	NaN	NaN	NaN	NaN	NaN	NaN	NaN	NaN	NaN	NaN	NaN
72.75	105.2	0.3	0.28	0.01	0	130	130	7.36	37	5.26	21	3.68	4	3.26	NaN	NaN	NaN	NaN	NaN	NaN	NaN	NaN	NaN	NaN	NaN	NaN	NaN	NaN	NaN	NaN	NaN	NaN	NaN	NaN	NaN	NaN	NaN
73	105.8	0.3	0.3	0	0	130	130	7.35	37	0.04	21	3.68	4	3.26	NaN	NaN	NaN	NaN	NaN	NaN	NaN	NaN	NaN	NaN	NaN	NaN	NaN	NaN	NaN	NaN	NaN	NaN	NaN	NaN	NaN	NaN	NaN
73.25	105.2	0.3	0.29	0	0	130	130	7.36	37	0.15	21	3.68	4	3.26	NaN	NaN	NaN	NaN	NaN	NaN	NaN	NaN	NaN	NaN	NaN	NaN	NaN	NaN	NaN	NaN	NaN	NaN	NaN	NaN	NaN	NaN	NaN
73.5	104.6	0.3	0.29	0	0	130	130	7.37	37	0.56	21	3.68	4	3.26	NaN	NaN	NaN	NaN	NaN	NaN	NaN	NaN	NaN	NaN	NaN	NaN	NaN	NaN	NaN	NaN	NaN	NaN	NaN	NaN	NaN	NaN	NaN
73.75	104.1	0.3	0.29	0	0	130	130	7.39	37	1.12	21	3.68	4	3.26	NaN	NaN	NaN	NaN	NaN	NaN	NaN	NaN	NaN	NaN	NaN	NaN	NaN	NaN	NaN	NaN	NaN	NaN	NaN	NaN	NaN	NaN	NaN
74	104.1	0.3	0.29	0.01	0	130	130	7.4	37	1.76	21	3.68	4	3.26	NaN	NaN	NaN	NaN	NaN	NaN	NaN	NaN	NaN	NaN	NaN	NaN	NaN	NaN	NaN	NaN	NaN	NaN	NaN	NaN	NaN	NaN	NaN
74.25	103.6	0.3	0.29	0.01	0	130	130	7.42	37	2.55	21	3.68	4	3.26	NaN	NaN	NaN	NaN	NaN	NaN	NaN	NaN	NaN	NaN	NaN	NaN	NaN	NaN	NaN	NaN	NaN	NaN	NaN	NaN	NaN	NaN	NaN
74.5	103.3	0.3	0.28	0.01	0	130	130	7.42	37	3.04	21	3.68	4	3.26	NaN	NaN	NaN	NaN	NaN	NaN	NaN	NaN	NaN	NaN	NaN	NaN	NaN	NaN	NaN	NaN	NaN	NaN	NaN	NaN	NaN	NaN	NaN
74.75	104.2	0.3	0.28	0.01	0	130	130	7.42	37	3.47	21	3.68	4	3.26	NaN	NaN	NaN	NaN	NaN	NaN	NaN	NaN	NaN	NaN	NaN	NaN	NaN	NaN	NaN	NaN	NaN	NaN	NaN	NaN	NaN	NaN	NaN
75	103.8	0.28	0.26	0.01	0	130	130	7.43	37	4.15	21	3.68	4	3.26	NaN	NaN	NaN	NaN	NaN	NaN	NaN	NaN	NaN	NaN	NaN	NaN	NaN	NaN	NaN	NaN	NaN	NaN	NaN	NaN	NaN	NaN	NaN
75.25	103	0.3	0.29	0.01	0	130	130	7.42	37	4.28	21	3.68	4	3.26	NaN	NaN	NaN	NaN	NaN	NaN	NaN	NaN	NaN	NaN	NaN	NaN	NaN	NaN	NaN	NaN	NaN	NaN	NaN	NaN	NaN	NaN	NaN
75.5	105.9	0.3	0.28	0.01	0	130	130	7.42	37	4.7	21	3.68	4	3.26	NaN	NaN	NaN	NaN	NaN	NaN	NaN	NaN	NaN	NaN	NaN	NaN	NaN	NaN	NaN	NaN	NaN	NaN	NaN	NaN	NaN	NaN	NaN
75.75	105	0.3	0.28	0.01	0	130	130	7.41	37	4.84	21	3.68	4	3.26	NaN	NaN	NaN	NaN	NaN	NaN	NaN	NaN	NaN	NaN	NaN	NaN	NaN	NaN	NaN	NaN	NaN	NaN	NaN	NaN	NaN	NaN	NaN
76	103.7	0.3	0.28	0.01	0	130	130	7.4	37	4.98	21	3.68	4	3.26	NaN	NaN	NaN	NaN	NaN	NaN	NaN	NaN	NaN	NaN	NaN	NaN	NaN	NaN	NaN	NaN	NaN	NaN	NaN	NaN	NaN	NaN	NaN
76.25	103.1	0.29	0.27	0.01	0	130	130	7.39	37	4.98	21	3.68	4	3.26	NaN	NaN	NaN	NaN	NaN	NaN	NaN	NaN	NaN	NaN	NaN	NaN	NaN	NaN	NaN	NaN	NaN	NaN	NaN	NaN	NaN	NaN	NaN
76.5	106.8	0.3	0.28	0.01	0	130	130	7.38	37	5.07	21	3.68	4	3.26	NaN	NaN	NaN	NaN	NaN	NaN	NaN	NaN	NaN	NaN	NaN	NaN	NaN	NaN	NaN	NaN	NaN	NaN	NaN	NaN	NaN	NaN	NaN
76.75	105.6	0.3	0.28	0.01	0	130	130	7.37	37	4.99	21	3.68	4	3.26	NaN	NaN	NaN	NaN	NaN	NaN	NaN	NaN	NaN	NaN	NaN	NaN	NaN	NaN	NaN	NaN	NaN	NaN	NaN	NaN	NaN	NaN	NaN
77	104.4	0.3	0.28	0.01	0	130	130	7.36	37	4.85	21	3.68	4	3.26	NaN	NaN	NaN	NaN	NaN	NaN	NaN	NaN	NaN	NaN	NaN	NaN	NaN	NaN	NaN	NaN	NaN	NaN	NaN	NaN	NaN	NaN	NaN
77.25	103.3	0.3	0.3	0	0	130	130	7.35	37	0.04	21	3.68	4	3.26	NaN	NaN	NaN	NaN	NaN	NaN	NaN	NaN	NaN	NaN	NaN	NaN	NaN	NaN	NaN	NaN	NaN	NaN	NaN	NaN	NaN	NaN	NaN
77.5	102.6	0.3	0.3	0	0	130	130	7.35	37	0.12	21	3.68	4	3.26	NaN	NaN	NaN	NaN	NaN	NaN	NaN	NaN	NaN	NaN	NaN	NaN	NaN	NaN	NaN	NaN	NaN	NaN	NaN	NaN	NaN	NaN	NaN
77.75	102.4	0.3	0.29	0	0	130	130	7.36	37	0.41	21	3.68	4	3.26	NaN	NaN	NaN	NaN	NaN	NaN	NaN	NaN	NaN	NaN	NaN	NaN	NaN	NaN	NaN	NaN	NaN	NaN	NaN	NaN	NaN	NaN	NaN
78	101.9	0.3	0.29	0	0	130	130	7.38	37	0.89	21	3.68	4	3.26	NaN	NaN	NaN	NaN	NaN	NaN	NaN	NaN	NaN	NaN	NaN	NaN	NaN	NaN	NaN	NaN	NaN	NaN	NaN	NaN	NaN	NaN	NaN
78.25	101.8	0.3	0.29	0	0	130	130	7.39	37	1.42	21	3.68	4	3.26	NaN	NaN	NaN	NaN	NaN	NaN	NaN	NaN	NaN	NaN	NaN	NaN	NaN	NaN	NaN	NaN	NaN	NaN	NaN	NaN	NaN	NaN	NaN
78.5	101.6	0.29	0.28	0.01	0	130	130	7.4	37	2.04	21	3.68	4	3.26	NaN	NaN	NaN	NaN	NaN	NaN	NaN	NaN	NaN	NaN	NaN	NaN	NaN	NaN	NaN	NaN	NaN	NaN	NaN	NaN	NaN	NaN	NaN
78.75	102	0.3	0.29	0.01	0	130	130	7.4	37	2.13	21	3.68	4	3.26	NaN	NaN	NaN	NaN	NaN	NaN	NaN	NaN	NaN	NaN	NaN	NaN	NaN	NaN	NaN	NaN	NaN	NaN	NaN	NaN	NaN	NaN	NaN
79	102.3	0.3	0.29	0.01	0	130	130	7.4	37	2.51	21	3.68	4	3.26	NaN	NaN	NaN	NaN	NaN	NaN	NaN	NaN	NaN	NaN	NaN	NaN	NaN	NaN	NaN	NaN	NaN	NaN	NaN	NaN	NaN	NaN	NaN
79.25	101.9	0.3	0.28	0.01	0	130	130	7.41	37	3.07	21	3.68	4	3.26	NaN	NaN	NaN	NaN	NaN	NaN	NaN	NaN	NaN	NaN	NaN	NaN	NaN	NaN	NaN	NaN	NaN	NaN	NaN	NaN	NaN	NaN	NaN
79.5	101.3	0.3	0.28	0.01	0	130	130	7.4	37	3.23	21	3.68	4	3.26	NaN	NaN	NaN	NaN	NaN	NaN	NaN	NaN	NaN	NaN	NaN	NaN	NaN	NaN	NaN	NaN	NaN	NaN	NaN	NaN	NaN	NaN	NaN
79.75	102.5	0.3	0.28	0.01	0	130	130	7.4	37	3.54	21	3.68	4	3.26	NaN	NaN	NaN	NaN	NaN	NaN	NaN	NaN	NaN	NaN	NaN	NaN	NaN	NaN	NaN	NaN	NaN	NaN	NaN	NaN	NaN	NaN	NaN
80	101.9	0.3	0.28	0.01	0	130	130	7.4	37	3.78	21	3.68	4	3.26	NaN	NaN	NaN	NaN	NaN	NaN	NaN	NaN	NaN	NaN	NaN	NaN	NaN	NaN	NaN	NaN	NaN	NaN	NaN	NaN	NaN	NaN	NaN
80.25	102.9	0.3	0.28	0.01	0	130	130	7.39	37	3.83	21	3.68	4	3.26	NaN	NaN	NaN	NaN	NaN	NaN	NaN	NaN	NaN	NaN	NaN	NaN	NaN	NaN	NaN	NaN	NaN	NaN	NaN	NaN	NaN	NaN	NaN
80.5	102.3	0.3	0.28	0.01	0	130	130	7.39	37	4.04	21	3.68	4	3.26	NaN	NaN	NaN	NaN	NaN	NaN	NaN	NaN	NaN	NaN	NaN	NaN	NaN	NaN	NaN	NaN	NaN	NaN	NaN	NaN	NaN	NaN	NaN
80.75	103.3	0.3	0.28	0.01	0	130	130	7.38	37	3.94	21	3.68	4	3.26	NaN	NaN	NaN	NaN	NaN	NaN	NaN	NaN	NaN	NaN	NaN	NaN	NaN	NaN	NaN	NaN	NaN	NaN	NaN	NaN	NaN	NaN	NaN
81	102.7	0.3	0.28	0.01	0	130	130	7.37	37	4.01	21	3.68	4	3.26	NaN	NaN	NaN	NaN	NaN	NaN	NaN	NaN	NaN	NaN	NaN	NaN	NaN	NaN	NaN	NaN	NaN	NaN	NaN	NaN	NaN	NaN	NaN
81.25	101.6	0.3	0.28	0.01	0	130	130	7.37	37	3.96	21	3.68	4	3.26	NaN	NaN	NaN	NaN	NaN	NaN	NaN	NaN	NaN	NaN	NaN	NaN	NaN	NaN	NaN	NaN	NaN	NaN	NaN	NaN	NaN	NaN	NaN
81.5	102.5	0.3	0.29	0	0	130	130	7.35	37	3.69	21	3.68	4	3.26	NaN	NaN	NaN	NaN	NaN	NaN	NaN	NaN	NaN	NaN	NaN	NaN	NaN	NaN	NaN	NaN	NaN	NaN	NaN	NaN	NaN	NaN	NaN
81.75	102.1	0.3	0.3	0	0	130	130	7.35	37	0.04	21	3.68	4	3.26	NaN	NaN	NaN	NaN	NaN	NaN	NaN	NaN	NaN	NaN	NaN	NaN	NaN	NaN	NaN	NaN	NaN	NaN	NaN	NaN	NaN	NaN	NaN
82	101.4	0.3	0.3	0	0	130	130	7.36	37	0.2	21	3.68	4	3.26	NaN	NaN	NaN	NaN	NaN	NaN	NaN	NaN	NaN	NaN	NaN	NaN	NaN	NaN	NaN	NaN	NaN	NaN	NaN	NaN	NaN	NaN	NaN
82.25	100.5	0.3	0.29	0	0	130	130	7.37	36.9	0.48	21	3.68	4	3.26	NaN	NaN	NaN	NaN	NaN	NaN	NaN	NaN	NaN	NaN	NaN	NaN	NaN	NaN	NaN	NaN	NaN	NaN	NaN	NaN	NaN	NaN	NaN
82.5	100.1	0.3	0.29	0	0	130	130	7.38	37	0.85	21	3.68	4	3.26	NaN	NaN	NaN	NaN	NaN	NaN	NaN	NaN	NaN	NaN	NaN	NaN	NaN	NaN	NaN	NaN	NaN	NaN	NaN	NaN	NaN	NaN	NaN
82.75	99.9	0.3	0.29	0	0	130	130	7.39	37	1.34	21	3.68	4	3.26	NaN	NaN	NaN	NaN	NaN	NaN	NaN	NaN	NaN	NaN	NaN	NaN	NaN	NaN	NaN	NaN	NaN	NaN	NaN	NaN	NaN	NaN	NaN
83	99.7	0.3	0.29	0.01	0	130	130	7.4	37	1.86	21	3.68	4	3.26	NaN	NaN	NaN	NaN	NaN	NaN	NaN	NaN	NaN	NaN	NaN	NaN	NaN	NaN	NaN	NaN	NaN	NaN	NaN	NaN	NaN	NaN	NaN
83.25	99.9	0.3	0.29	0.01	0	130	130	7.41	37	2.5	21	3.68	4	3.26	NaN	NaN	NaN	NaN	NaN	NaN	NaN	NaN	NaN	NaN	NaN	NaN	NaN	NaN	NaN	NaN	NaN	NaN	NaN	NaN	NaN	NaN	NaN
83.5	100.8	0.3	0.29	0.01	0	130	130	7.39	37	2.37	21	3.68	4	3.26	NaN	NaN	NaN	NaN	NaN	NaN	NaN	NaN	NaN	NaN	NaN	NaN	NaN	NaN	NaN	NaN	NaN	NaN	NaN	NaN	NaN	NaN	NaN
83.75	100.3	0.3	0.29	0.01	0	130	130	7.39	37	2.67	21	3.68	4	3.26	NaN	NaN	NaN	NaN	NaN	NaN	NaN	NaN	NaN	NaN	NaN	NaN	NaN	NaN	NaN	NaN	NaN	NaN	NaN	NaN	NaN	NaN	NaN
84	100	0.3	0.29	0.01	0	130	130	7.4	37	3.08	21	3.68	4	3.26	NaN	NaN	NaN	NaN	NaN	NaN	NaN	NaN	NaN	NaN	NaN	NaN	NaN	NaN	NaN	NaN	NaN	NaN	NaN	NaN	NaN	NaN	NaN
84.25	100.7	0.3	0.29	0.01	0	130	130	7.38	37.1	2.89	21	3.68	4	3.26	NaN	NaN	NaN	NaN	NaN	NaN	NaN	NaN	NaN	NaN	NaN	NaN	NaN	NaN	NaN	NaN	NaN	NaN	NaN	NaN	NaN	NaN	NaN
84.5	100.5	0.3	0.28	0.01	0	130	130	7.38	37	3.09	21	3.68	4	3.26	NaN	NaN	NaN	NaN	NaN	NaN	NaN	NaN	NaN	NaN	NaN	NaN	NaN	NaN	NaN	NaN	NaN	NaN	NaN	NaN	NaN	NaN	NaN
84.75	100.1	0.3	0.28	0.01	0	130	130	7.38	37	3.26	21	3.68	4	3.26	NaN	NaN	NaN	NaN	NaN	NaN	NaN	NaN	NaN	NaN	NaN	NaN	NaN	NaN	NaN	NaN	NaN	NaN	NaN	NaN	NaN	NaN	NaN
85	100.9	0.3	0.28	0.01	0	130	130	7.37	37	3	21	3.68	4	3.26	NaN	NaN	NaN	NaN	NaN	NaN	NaN	NaN	NaN	NaN	NaN	NaN	NaN	NaN	NaN	NaN	NaN	NaN	NaN	NaN	NaN	NaN	NaN
85.25	100.5	0.3	0.28	0.01	0	130	130	7.37	37	3.13	21	3.68	4	3.26	NaN	NaN	NaN	NaN	NaN	NaN	NaN	NaN	NaN	NaN	NaN	NaN	NaN	NaN	NaN	NaN	NaN	NaN	NaN	NaN	NaN	NaN	NaN
85.5	99.5	0.3	0.29	0.01	0	130	130	7.35	37	2.87	21	3.68	4	3.26	NaN	NaN	NaN	NaN	NaN	NaN	NaN	NaN	NaN	NaN	NaN	NaN	NaN	NaN	NaN	NaN	NaN	NaN	NaN	NaN	NaN	NaN	NaN
85.75	100.6	0.3	0.3	0	0	130	130	7.35	37	0.04	21	3.68	4	3.26	NaN	NaN	NaN	NaN	NaN	NaN	NaN	NaN	NaN	NaN	NaN	NaN	NaN	NaN	NaN	NaN	NaN	NaN	NaN	NaN	NaN	NaN	NaN
86	99.9	0.3	0.3	0	0	130	130	7.35	37	0.08	21	3.68	4	3.26	NaN	NaN	NaN	NaN	NaN	NaN	NaN	NaN	NaN	NaN	NaN	NaN	NaN	NaN	NaN	NaN	NaN	NaN	NaN	NaN	NaN	NaN	NaN
86.25	99.4	0.3	0.29	0	0	130	130	7.36	37	0.29	21	3.68	4	3.26	NaN	NaN	NaN	NaN	NaN	NaN	NaN	NaN	NaN	NaN	NaN	NaN	NaN	NaN	NaN	NaN	NaN	NaN	NaN	NaN	NaN	NaN	NaN
86.5	99	0.3	0.29	0	0	130	130	7.37	37	0.55	21	3.68	4	3.26	NaN	NaN	NaN	NaN	NaN	NaN	NaN	NaN	NaN	NaN	NaN	NaN	NaN	NaN	NaN	NaN	NaN	NaN	NaN	NaN	NaN	NaN	NaN
86.75	98.9	0.3	0.29	0	0	130	130	7.38	37	0.91	21	3.68	4	3.26	NaN	NaN	NaN	NaN	NaN	NaN	NaN	NaN	NaN	NaN	NaN	NaN	NaN	NaN	NaN	NaN	NaN	NaN	NaN	NaN	NaN	NaN	NaN
87	98.5	0.3	0.29	0	0	130	130	7.38	37	1.29	21	3.68	4	3.26	NaN	NaN	NaN	NaN	NaN	NaN	NaN	NaN	NaN	NaN	NaN	NaN	NaN	NaN	NaN	NaN	NaN	NaN	NaN	NaN	NaN	NaN	NaN
87.25	98.5	0.3	0.29	0.01	0	130	130	7.39	37	1.73	21	3.68	4	3.26	NaN	NaN	NaN	NaN	NaN	NaN	NaN	NaN	NaN	NaN	NaN	NaN	NaN	NaN	NaN	NaN	NaN	NaN	NaN	NaN	NaN	NaN	NaN
87.5	98.4	0.3	0.29	0.01	0	130	130	7.39	37	2.14	21	3.68	4	3.26	NaN	NaN	NaN	NaN	NaN	NaN	NaN	NaN	NaN	NaN	NaN	NaN	NaN	NaN	NaN	NaN	NaN	NaN	NaN	NaN	NaN	NaN	NaN
87.75	97.7	0.3	0.29	0.01	0	130	130	7.38	37	1.88	21	3.68	4	3.26	NaN	NaN	NaN	NaN	NaN	NaN	NaN	NaN	NaN	NaN	NaN	NaN	NaN	NaN	NaN	NaN	NaN	NaN	NaN	NaN	NaN	NaN	NaN
88	99.6	0.3	0.29	0.01	0	130	130	7.38	37	1.99	21	3.68	4	3.26	NaN	NaN	NaN	NaN	NaN	NaN	NaN	NaN	NaN	NaN	NaN	NaN	NaN	NaN	NaN	NaN	NaN	NaN	NaN	NaN	NaN	NaN	NaN
88.25	99	0.3	0.29	0.01	0	130	130	7.38	37	2.23	21	3.68	4	3.26	NaN	NaN	NaN	NaN	NaN	NaN	NaN	NaN	NaN	NaN	NaN	NaN	NaN	NaN	NaN	NaN	NaN	NaN	NaN	NaN	NaN	NaN	NaN
88.5	98.2	0.3	0.29	0.01	0	130	130	7.37	37	2.26	21	3.68	4	3.26	NaN	NaN	NaN	NaN	NaN	NaN	NaN	NaN	NaN	NaN	NaN	NaN	NaN	NaN	NaN	NaN	NaN	NaN	NaN	NaN	NaN	NaN	NaN
88.75	97.6	0.3	0.29	0.01	0	130	130	7.36	37	2.14	21	3.68	4	3.26	NaN	NaN	NaN	NaN	NaN	NaN	NaN	NaN	NaN	NaN	NaN	NaN	NaN	NaN	NaN	NaN	NaN	NaN	NaN	NaN	NaN	NaN	NaN
89	97	0.3	0.29	0.01	0	130	130	7.36	37	2.22	21	3.68	4	3.26	NaN	NaN	NaN	NaN	NaN	NaN	NaN	NaN	NaN	NaN	NaN	NaN	NaN	NaN	NaN	NaN	NaN	NaN	NaN	NaN	NaN	NaN	NaN
89.25	97.6	0.3	0.29	0.01	0	130	130	7.36	37	2.19	21	3.68	4	3.26	NaN	NaN	NaN	NaN	NaN	NaN	NaN	NaN	NaN	NaN	NaN	NaN	NaN	NaN	NaN	NaN	NaN	NaN	NaN	NaN	NaN	NaN	NaN
89.5	99.2	0.3	0.29	0.01	0	130	130	7.36	37	2.18	21	3.68	4	3.26	NaN	NaN	NaN	NaN	NaN	NaN	NaN	NaN	NaN	NaN	NaN	NaN	NaN	NaN	NaN	NaN	NaN	NaN	NaN	NaN	NaN	NaN	NaN
89.75	98.4	0.3	0.3	0	0	130	130	7.34	37	0.04	21	3.68	4	3.26	NaN	NaN	NaN	NaN	NaN	NaN	NaN	NaN	NaN	NaN	NaN	NaN	NaN	NaN	NaN	NaN	NaN	NaN	NaN	NaN	NaN	NaN	NaN
90	97.4	0.3	0.3	0	0	130	130	7.34	37	0.04	21	3.68	4	3.26	NaN	NaN	NaN	NaN	NaN	NaN	NaN	NaN	NaN	NaN	NaN	NaN	NaN	NaN	NaN	NaN	NaN	NaN	NaN	NaN	NaN	NaN	NaN
90.25	97.1	0.3	0.29	0	0	130	130	7.35	37	0.04	21	3.68	4	3.26	NaN	NaN	NaN	NaN	NaN	NaN	NaN	NaN	NaN	NaN	NaN	NaN	NaN	NaN	NaN	NaN	NaN	NaN	NaN	NaN	NaN	NaN	NaN
90.5	96.8	0.3	0.3	0	0	130	130	7.35	37	0.04	21	3.68	4	3.26	NaN	NaN	NaN	NaN	NaN	NaN	NaN	NaN	NaN	NaN	NaN	NaN	NaN	NaN	NaN	NaN	NaN	NaN	NaN	NaN	NaN	NaN	NaN
90.75	96.2	0.3	0.3	0	0	130	130	7.35	37	0.07	21	3.68	4	3.26	NaN	NaN	NaN	NaN	NaN	NaN	NaN	NaN	NaN	NaN	NaN	NaN	NaN	NaN	NaN	NaN	NaN	NaN	NaN	NaN	NaN	NaN	NaN
91	95.9	0.3	0.29	0	0	130	130	7.36	37	0.21	21	3.68	4	3.26	NaN	NaN	NaN	NaN	NaN	NaN	NaN	NaN	NaN	NaN	NaN	NaN	NaN	NaN	NaN	NaN	NaN	NaN	NaN	NaN	NaN	NaN	NaN
91.25	95.3	0.3	0.3	0	0	130	130	7.36	37	0.33	21	3.68	4	3.26	NaN	NaN	NaN	NaN	NaN	NaN	NaN	NaN	NaN	NaN	NaN	NaN	NaN	NaN	NaN	NaN	NaN	NaN	NaN	NaN	NaN	NaN	NaN
91.5	94.9	0.3	0.29	0	0	130	130	7.36	37	0.51	21	3.68	4	3.26	NaN	NaN	NaN	NaN	NaN	NaN	NaN	NaN	NaN	NaN	NaN	NaN	NaN	NaN	NaN	NaN	NaN	NaN	NaN	NaN	NaN	NaN	NaN
91.75	94.8	0.3	0.29	0	0	130	130	7.37	37	0.68	21	3.68	4	3.26	NaN	NaN	NaN	NaN	NaN	NaN	NaN	NaN	NaN	NaN	NaN	NaN	NaN	NaN	NaN	NaN	NaN	NaN	NaN	NaN	NaN	NaN	NaN
92	94.6	0.3	0.29	0	0	130	130	7.37	37	0.91	21	3.68	4	3.26	NaN	NaN	NaN	NaN	NaN	NaN	NaN	NaN	NaN	NaN	NaN	NaN	NaN	NaN	NaN	NaN	NaN	NaN	NaN	NaN	NaN	NaN	NaN
92.25	94.7	0.3	0.29	0	0	130	130	7.37	37	1.13	21	3.68	4	3.26	NaN	NaN	NaN	NaN	NaN	NaN	NaN	NaN	NaN	NaN	NaN	NaN	NaN	NaN	NaN	NaN	NaN	NaN	NaN	NaN	NaN	NaN	NaN
92.5	94.7	0.3	0.29	0	0	130	130	7.37	37	1.08	21	3.68	4	3.26	NaN	NaN	NaN	NaN	NaN	NaN	NaN	NaN	NaN	NaN	NaN	NaN	NaN	NaN	NaN	NaN	NaN	NaN	NaN	NaN	NaN	NaN	NaN
92.75	94.4	0.3	0.29	0	0	130	130	7.36	37	0.87	21	3.68	4	3.26	NaN	NaN	NaN	NaN	NaN	NaN	NaN	NaN	NaN	NaN	NaN	NaN	NaN	NaN	NaN	NaN	NaN	NaN	NaN	NaN	NaN	NaN	NaN
93	94.2	0.3	0.29	0	0	130	130	7.35	37	0.83	21	3.68	4	3.26	NaN	NaN	NaN	NaN	NaN	NaN	NaN	NaN	NaN	NaN	NaN	NaN	NaN	NaN	NaN	NaN	NaN	NaN	NaN	NaN	NaN	NaN	NaN
93.25	94.2	0.3	0.29	0	0	130	130	7.35	37	0.85	21	3.68	4	3.26	NaN	NaN	NaN	NaN	NaN	NaN	NaN	NaN	NaN	NaN	NaN	NaN	NaN	NaN	NaN	NaN	NaN	NaN	NaN	NaN	NaN	NaN	NaN
93.5	94.2	0.3	0.29	0	0	130	130	7.35	37	0.89	21	3.68	4	3.26	NaN	NaN	NaN	NaN	NaN	NaN	NaN	NaN	NaN	NaN	NaN	NaN	NaN	NaN	NaN	NaN	NaN	NaN	NaN	NaN	NaN	NaN	NaN
93.75	94.2	0.3	0.29	0	0	130	130	7.36	37	0.92	21	3.68	4	3.26	NaN	NaN	NaN	NaN	NaN	NaN	NaN	NaN	NaN	NaN	NaN	NaN	NaN	NaN	NaN	NaN	NaN	NaN	NaN	NaN	NaN	NaN	NaN
94	93.6	0.32	0.29	0	0	130	130	7.35	37	0.93	21	3.68	4	3.26	NaN	NaN	NaN	NaN	NaN	NaN	NaN	NaN	NaN	NaN	NaN	NaN	NaN	NaN	NaN	NaN	NaN	NaN	NaN	NaN	NaN	NaN	NaN
94.25	93.2	0.3	0.3	0	0	130	130	7.33	37	0.04	21	3.68	4	3.26	NaN	NaN	NaN	NaN	NaN	NaN	NaN	NaN	NaN	NaN	NaN	NaN	NaN	NaN	NaN	NaN	NaN	NaN	NaN	NaN	NaN	NaN	NaN
94.5	92.9	0.3	0.3	0	0	130	130	7.32	37	0.04	21	3.68	4	3.26	NaN	NaN	NaN	NaN	NaN	NaN	NaN	NaN	NaN	NaN	NaN	NaN	NaN	NaN	NaN	NaN	NaN	NaN	NaN	NaN	NaN	NaN	NaN
94.75	92.7	0.3	0.3	0	0	130	130	7.32	37	0.04	21	3.68	4	3.26	NaN	NaN	NaN	NaN	NaN	NaN	NaN	NaN	NaN	NaN	NaN	NaN	NaN	NaN	NaN	NaN	NaN	NaN	NaN	NaN	NaN	NaN	NaN
95	92.6	0.3	0.3	0	0	130	130	7.32	37	0.04	21	3.68	4	3.26	NaN	NaN	NaN	NaN	NaN	NaN	NaN	NaN	NaN	NaN	NaN	NaN	NaN	NaN	NaN	NaN	NaN	NaN	NaN	NaN	NaN	NaN	NaN
95.25	92.2	0.3	0.3	0	0	130	130	7.32	37	0.04	21	3.68	4	3.26	NaN	NaN	NaN	NaN	NaN	NaN	NaN	NaN	NaN	NaN	NaN	NaN	NaN	NaN	NaN	NaN	NaN	NaN	NaN	NaN	NaN	NaN	NaN
95.5	92.1	0.3	0.3	0	0	130	130	7.32	37	0.04	21	3.68	4	3.26	NaN	NaN	NaN	NaN	NaN	NaN	NaN	NaN	NaN	NaN	NaN	NaN	NaN	NaN	NaN	NaN	NaN	NaN	NaN	NaN	NaN	NaN	NaN
95.75	92.1	0.3	0.3	0	0	130	130	7.32	37	0.04	21	3.68	4	3.26	NaN	NaN	NaN	NaN	NaN	NaN	NaN	NaN	NaN	NaN	NaN	NaN	NaN	NaN	NaN	NaN	NaN	NaN	NaN	NaN	NaN	NaN	NaN
96	92.4	0.3	0.3	0	0	130	130	7.33	37	0.04	21	3.68	4	3.26	660	2.4	1.584	NaN	NaN	NaN	0.8	0.0333333	NaN	400000	2e-06	2.13582	182	1.6	17.92	2.95456	32.5111	0.0213327	NaN	NaN	NaN	NaN	NaN
96.25	92.6	0.3	0.3	0	0	130	130	7.33	37	0.04	21	3.68	4	3.26	NaN	NaN	NaN	NaN	NaN	NaN	NaN	NaN	NaN	NaN	NaN	NaN	NaN	NaN	NaN	NaN	NaN	NaN	NaN	NaN	NaN	NaN	NaN
96.5	92.7	0.3	0.3	0	0	130	130	7.33	37	0.04	21	3.68	4	3.26	NaN	NaN	NaN	NaN	NaN	NaN	NaN	NaN	NaN	NaN	NaN	NaN	NaN	NaN	NaN	NaN	NaN	NaN	NaN	NaN	NaN	NaN	NaN
96.75	92.6	0.3	0.3	0	0	130	130	7.33	37	0.04	21	3.68	4	3.26	NaN	NaN	NaN	1.386	2	3.66	NaN	NaN	NaN	NaN	NaN	NaN	NaN	NaN	NaN	NaN	NaN	NaN	NaN	NaN	NaN	NaN	NaN
97	92.4	0.3	0.3	0	0	130	130	7.33	37	0.04	21	3.68	4	3.26	NaN	NaN	NaN	NaN	NaN	NaN	NaN	NaN	NaN	NaN	NaN	NaN	NaN	NaN	NaN	NaN	NaN	NaN	NaN	NaN	NaN	NaN	NaN
97.25	92.1	0.3	0.3	0	0	130	130	7.32	37	0.04	21	3.68	4	3.26	NaN	NaN	NaN	NaN	NaN	NaN	NaN	NaN	NaN	NaN	NaN	NaN	NaN	NaN	NaN	NaN	NaN	NaN	NaN	NaN	NaN	NaN	NaN
97.5	91.8	0.3	0.3	0	0	130	130	7.32	37	0.04	21	3.68	4	3.26	NaN	NaN	NaN	NaN	NaN	NaN	NaN	NaN	NaN	NaN	NaN	NaN	NaN	NaN	NaN	NaN	NaN	NaN	NaN	NaN	NaN	NaN	NaN
97.75	91	0.3	0.3	0	0	130	130	7.32	37	0.04	21	3.68	4	3.26	NaN	NaN	NaN	NaN	NaN	NaN	NaN	NaN	NaN	NaN	NaN	NaN	NaN	NaN	NaN	NaN	NaN	NaN	NaN	NaN	NaN	NaN	NaN
98	90.9	0.3	0.3	0	0	130	130	7.32	37	0.04	21	3.68	4	3.26	NaN	NaN	NaN	NaN	NaN	NaN	NaN	NaN	NaN	NaN	NaN	NaN	NaN	NaN	NaN	NaN	NaN	NaN	NaN	NaN	NaN	NaN	NaN
98.25	91.2	0.3	0.3	0	0	130	130	7.32	37	0.04	21	3.68	4	3.26	NaN	NaN	NaN	NaN	NaN	NaN	NaN	NaN	NaN	NaN	NaN	NaN	NaN	NaN	NaN	NaN	NaN	NaN	NaN	NaN	NaN	NaN	NaN
98.5	91.2	0.3	0.3	0	0	130	130	7.32	37	0.04	21	3.68	4	3.26	NaN	NaN	NaN	NaN	NaN	NaN	NaN	NaN	NaN	NaN	NaN	NaN	NaN	NaN	NaN	NaN	NaN	NaN	NaN	NaN	NaN	NaN	NaN
98.75	91.4	0.3	0.3	0	0	130	130	7.31	37	0.04	21	3.68	4	3.26	NaN	NaN	NaN	NaN	NaN	NaN	NaN	NaN	NaN	NaN	NaN	NaN	NaN	NaN	NaN	NaN	NaN	NaN	NaN	NaN	NaN	NaN	NaN
99	90.5	0	0	0	0	70	130	7.31	36.7	0	0	3.68	4	3.26	NaN	NaN	NaN	NaN	NaN	NaN	NaN	NaN	NaN	NaN	NaN	NaN	NaN	NaN	NaN	NaN	NaN	NaN	NaN	NaN	NaN	NaN	NaN
99.25	105.5	0.3	0.28	0.01	0	130	130	7.51	36.9	4.63	21	3.68	4	3.26	NaN	NaN	NaN	NaN	NaN	NaN	NaN	NaN	NaN	NaN	NaN	NaN	NaN	NaN	NaN	NaN	NaN	NaN	NaN	NaN	NaN	NaN	NaN
99.5	102.4	0.3	0.28	0.01	0	130	130	7.49	38.4	5.08	21	3.68	4	3.26	NaN	NaN	NaN	NaN	NaN	NaN	NaN	NaN	NaN	NaN	NaN	NaN	NaN	NaN	NaN	NaN	NaN	NaN	NaN	NaN	NaN	NaN	NaN
99.75	99.6	0.3	0.27	0.02	0	130	130	7.49	35.6	5.93	21	3.68	4	3.26	NaN	NaN	NaN	NaN	NaN	NaN	NaN	NaN	NaN	NaN	NaN	NaN	NaN	NaN	NaN	NaN	NaN	NaN	NaN	NaN	NaN	NaN	NaN
100	97.5	0.3	0.27	0.02	0	130	130	7.45	38.2	5.86	21	3.68	4	3.26	NaN	NaN	NaN	NaN	NaN	NaN	NaN	NaN	NaN	NaN	NaN	NaN	NaN	NaN	NaN	NaN	NaN	NaN	NaN	NaN	NaN	NaN	NaN
100.25	97.9	0.3	0.27	0.02	0	130	130	7.43	36.8	5.76	21	3.68	4	3.26	NaN	NaN	NaN	NaN	NaN	NaN	NaN	NaN	NaN	NaN	NaN	NaN	NaN	NaN	NaN	NaN	NaN	NaN	NaN	NaN	NaN	NaN	NaN
100.5	96.7	0.3	0.27	0.02	0	130	130	7.4	36.4	5.51	21	3.68	4	3.26	NaN	NaN	NaN	NaN	NaN	NaN	NaN	NaN	NaN	NaN	NaN	NaN	NaN	NaN	NaN	NaN	NaN	NaN	NaN	NaN	NaN	NaN	NaN
100.75	95.8	0.3	0.28	0.02	0	130	130	7.38	37.9	5.18	21	3.68	4	3.26	NaN	NaN	NaN	NaN	NaN	NaN	NaN	NaN	NaN	NaN	NaN	NaN	NaN	NaN	NaN	NaN	NaN	NaN	NaN	NaN	NaN	NaN	NaN
101	95.6	0.3	0.28	0.01	0	130	130	7.36	36.7	4.69	21	3.68	4	3.26	NaN	NaN	NaN	NaN	NaN	NaN	NaN	NaN	NaN	NaN	NaN	NaN	NaN	NaN	NaN	NaN	NaN	NaN	NaN	NaN	NaN	NaN	NaN
101.25	94.2	0.3	0.3	0	0	130	130	7.34	36.5	0.04	21	3.68	4	3.26	NaN	NaN	NaN	NaN	NaN	NaN	NaN	NaN	NaN	NaN	NaN	NaN	NaN	NaN	NaN	NaN	NaN	NaN	NaN	NaN	NaN	NaN	NaN
101.5	94	0.3	0.3	0	0	130	130	7.32	37.6	0.04	21	3.68	4	3.26	NaN	NaN	NaN	NaN	NaN	NaN	NaN	NaN	NaN	NaN	NaN	NaN	NaN	NaN	NaN	NaN	NaN	NaN	NaN	NaN	NaN	NaN	NaN
101.75	91.9	0.3	0.3	0	0	130	130	7.32	37.3	0.04	21	3.68	4	3.26	NaN	NaN	NaN	NaN	NaN	NaN	NaN	NaN	NaN	NaN	NaN	NaN	NaN	NaN	NaN	NaN	NaN	NaN	NaN	NaN	NaN	NaN	NaN
102	91	0.3	0.3	0	0	130	130	7.33	36.5	0.04	21	3.68	4	3.26	NaN	NaN	NaN	NaN	NaN	NaN	NaN	NaN	NaN	NaN	NaN	NaN	NaN	NaN	NaN	NaN	NaN	NaN	NaN	NaN	NaN	NaN	NaN
102.25	90.6	0.3	0.3	0	0	130	130	7.34	36.9	0.04	21	3.68	4	3.26	NaN	NaN	NaN	NaN	NaN	NaN	NaN	NaN	NaN	NaN	NaN	NaN	NaN	NaN	NaN	NaN	NaN	NaN	NaN	NaN	NaN	NaN	NaN
102.5	90.1	0.3	0.3	0	0	130	130	7.34	37.3	0.04	21	3.68	4	3.26	NaN	NaN	NaN	NaN	NaN	NaN	NaN	NaN	NaN	NaN	NaN	NaN	NaN	NaN	NaN	NaN	NaN	NaN	NaN	NaN	NaN	NaN	NaN
102.75	89	0.3	0.3	0	0	130	130	7.35	36.9	0.04	21	3.68	4	3.26	NaN	NaN	NaN	NaN	NaN	NaN	NaN	NaN	NaN	NaN	NaN	NaN	NaN	NaN	NaN	NaN	NaN	NaN	NaN	NaN	NaN	NaN	NaN
103	88.4	0.3	0.29	0	0	130	130	7.35	36.8	0.1	21	3.68	4	3.26	NaN	NaN	NaN	NaN	NaN	NaN	NaN	NaN	NaN	NaN	NaN	NaN	NaN	NaN	NaN	NaN	NaN	NaN	NaN	NaN	NaN	NaN	NaN
103.25	88.2	0.3	0.29	0	0	130	130	7.36	37.1	0.23	21	3.68	4	3.26	NaN	NaN	NaN	NaN	NaN	NaN	NaN	NaN	NaN	NaN	NaN	NaN	NaN	NaN	NaN	NaN	NaN	NaN	NaN	NaN	NaN	NaN	NaN
103.5	87.7	0.3	0.29	0	0	130	130	7.36	37.2	0.46	21	3.68	4	3.26	NaN	NaN	NaN	NaN	NaN	NaN	NaN	NaN	NaN	NaN	NaN	NaN	NaN	NaN	NaN	NaN	NaN	NaN	NaN	NaN	NaN	NaN	NaN
103.75	87.4	0.3	0.29	0	0	130	130	7.37	36.9	0.71	21	3.68	4	3.26	NaN	NaN	NaN	NaN	NaN	NaN	NaN	NaN	NaN	NaN	NaN	NaN	NaN	NaN	NaN	NaN	NaN	NaN	NaN	NaN	NaN	NaN	NaN
104	87.3	0.3	0.29	0	0	130	130	7.37	36.9	0.95	21	3.68	4	3.26	NaN	NaN	NaN	NaN	NaN	NaN	NaN	NaN	NaN	NaN	NaN	NaN	NaN	NaN	NaN	NaN	NaN	NaN	NaN	NaN	NaN	NaN	NaN
104.25	86.9	0.3	0.29	0	0	130	130	7.38	37.1	1.15	21	3.68	4	3.26	NaN	NaN	NaN	NaN	NaN	NaN	NaN	NaN	NaN	NaN	NaN	NaN	NaN	NaN	NaN	NaN	NaN	NaN	NaN	NaN	NaN	NaN	NaN
104.5	86.7	0.3	0.29	0	0	130	130	7.38	37.1	1.43	21	3.68	4	3.26	NaN	NaN	NaN	NaN	NaN	NaN	NaN	NaN	NaN	NaN	NaN	NaN	NaN	NaN	NaN	NaN	NaN	NaN	NaN	NaN	NaN	NaN	NaN
104.75	86.3	0.3	0.29	0.01	0	130	130	7.38	37	1.74	21	3.68	4	3.26	NaN	NaN	NaN	NaN	NaN	NaN	NaN	NaN	NaN	NaN	NaN	NaN	NaN	NaN	NaN	NaN	NaN	NaN	NaN	NaN	NaN	NaN	NaN
105	86	0.3	0.29	0.01	0	130	130	7.37	36.9	1.75	21	3.68	4	3.26	NaN	NaN	NaN	NaN	NaN	NaN	NaN	NaN	NaN	NaN	NaN	NaN	NaN	NaN	NaN	NaN	NaN	NaN	NaN	NaN	NaN	NaN	NaN
105.25	86.9	0.3	0.29	0	0	130	130	7.36	37	1.38	21	3.68	4	3.26	NaN	NaN	NaN	NaN	NaN	NaN	NaN	NaN	NaN	NaN	NaN	NaN	NaN	NaN	NaN	NaN	NaN	NaN	NaN	NaN	NaN	NaN	NaN
105.5	86.4	0.3	0.29	0	0	130	130	7.35	37.1	1.29	21	3.68	4	3.26	NaN	NaN	NaN	NaN	NaN	NaN	NaN	NaN	NaN	NaN	NaN	NaN	NaN	NaN	NaN	NaN	NaN	NaN	NaN	NaN	NaN	NaN	NaN
105.75	85.9	0.3	0.29	0	0	130	130	7.35	37	1.3	21	3.68	4	3.26	NaN	NaN	NaN	NaN	NaN	NaN	NaN	NaN	NaN	NaN	NaN	NaN	NaN	NaN	NaN	NaN	NaN	NaN	NaN	NaN	NaN	NaN	NaN
106	85.3	0.3	0.29	0	0	130	130	7.35	37	1.31	21	3.68	4	3.26	NaN	NaN	NaN	NaN	NaN	NaN	NaN	NaN	NaN	NaN	NaN	NaN	NaN	NaN	NaN	NaN	NaN	NaN	NaN	NaN	NaN	NaN	NaN
106.25	85.1	0.3	0.29	0	0	130	130	7.35	37	1.34	21	3.68	4	3.26	NaN	NaN	NaN	NaN	NaN	NaN	NaN	NaN	NaN	NaN	NaN	NaN	NaN	NaN	NaN	NaN	NaN	NaN	NaN	NaN	NaN	NaN	NaN
106.5	84.4	0.3	0.3	0	0	130	130	7.34	37	0.04	21	3.68	4	3.26	NaN	NaN	NaN	NaN	NaN	NaN	NaN	NaN	NaN	NaN	NaN	NaN	NaN	NaN	NaN	NaN	NaN	NaN	NaN	NaN	NaN	NaN	NaN
106.75	84	0.3	0.3	0	0	130	130	7.33	37	0.04	21	3.68	4	3.26	NaN	NaN	NaN	NaN	NaN	NaN	NaN	NaN	NaN	NaN	NaN	NaN	NaN	NaN	NaN	NaN	NaN	NaN	NaN	NaN	NaN	NaN	NaN
107	83.5	0.3	0.3	0	0	130	130	7.32	37	0.04	21	3.68	4	3.26	NaN	NaN	NaN	NaN	NaN	NaN	NaN	NaN	NaN	NaN	NaN	NaN	NaN	NaN	NaN	NaN	NaN	NaN	NaN	NaN	NaN	NaN	NaN
107.25	82.9	0.3	0.3	0	0	130	130	7.32	37	0.04	21	3.68	4	3.26	NaN	NaN	NaN	NaN	NaN	NaN	NaN	NaN	NaN	NaN	NaN	NaN	NaN	NaN	NaN	NaN	NaN	NaN	NaN	NaN	NaN	NaN	NaN
107.5	82.9	0.3	0.3	0	0	130	130	7.32	37	0.04	21	3.68	4	3.26	NaN	NaN	NaN	NaN	NaN	NaN	NaN	NaN	NaN	NaN	NaN	NaN	NaN	NaN	NaN	NaN	NaN	NaN	NaN	NaN	NaN	NaN	NaN
107.75	82.5	0.3	0.3	0	0	130	130	7.32	37	0.04	21	3.68	4	3.26	NaN	NaN	NaN	NaN	NaN	NaN	NaN	NaN	NaN	NaN	NaN	NaN	NaN	NaN	NaN	NaN	NaN	NaN	NaN	NaN	NaN	NaN	NaN
108	82.3	0.3	0.3	0	0	130	130	7.33	37	0.04	21	3.68	4	3.26	NaN	NaN	NaN	NaN	NaN	NaN	NaN	NaN	NaN	NaN	NaN	NaN	NaN	NaN	NaN	NaN	NaN	NaN	NaN	NaN	NaN	NaN	NaN
108.25	82.5	0.3	0.3	0	0	130	130	7.33	37	0.04	21	3.68	4	3.26	NaN	NaN	NaN	NaN	NaN	NaN	NaN	NaN	NaN	NaN	NaN	NaN	NaN	NaN	NaN	NaN	NaN	NaN	NaN	NaN	NaN	NaN	NaN
108.5	82	0.3	0.29	0	0	130	130	7.33	37	0.04	21	3.68	4	3.26	NaN	NaN	NaN	NaN	NaN	NaN	NaN	NaN	NaN	NaN	NaN	NaN	NaN	NaN	NaN	NaN	NaN	NaN	NaN	NaN	NaN	NaN	NaN
108.75	81.9	0.3	0.3	0	0	130	130	7.33	37	0.04	21	3.68	4	3.26	NaN	NaN	NaN	NaN	NaN	NaN	NaN	NaN	NaN	NaN	NaN	NaN	NaN	NaN	NaN	NaN	NaN	NaN	NaN	NaN	NaN	NaN	NaN
109	81.6	0.3	0.3	0	0	130	130	7.33	37	0.04	21	3.68	4	3.26	NaN	NaN	NaN	NaN	NaN	NaN	NaN	NaN	NaN	NaN	NaN	NaN	NaN	NaN	NaN	NaN	NaN	NaN	NaN	NaN	NaN	NaN	NaN
109.25	81.4	0.3	0.3	0	0	130	130	7.32	37	0.04	21	3.68	4	3.26	NaN	NaN	NaN	NaN	NaN	NaN	NaN	NaN	NaN	NaN	NaN	NaN	NaN	NaN	NaN	NaN	NaN	NaN	NaN	NaN	NaN	NaN	NaN
109.5	81.2	0.3	0.3	0	0	130	130	7.32	37	0.04	21	3.68	4	3.26	NaN	NaN	NaN	NaN	NaN	NaN	NaN	NaN	NaN	NaN	NaN	NaN	NaN	NaN	NaN	NaN	NaN	NaN	NaN	NaN	NaN	NaN	NaN
109.75	80.8	0.3	0.3	0	0	130	130	7.32	37	0.04	21	3.68	4	3.26	NaN	NaN	NaN	NaN	NaN	NaN	NaN	NaN	NaN	NaN	NaN	NaN	NaN	NaN	NaN	NaN	NaN	NaN	NaN	NaN	NaN	NaN	NaN
110	80.3	0.3	0.29	0	0	130	130	7.32	37	0.04	21	3.68	4	3.26	NaN	NaN	NaN	NaN	NaN	NaN	NaN	NaN	NaN	NaN	NaN	NaN	NaN	NaN	NaN	NaN	NaN	NaN	NaN	NaN	NaN	NaN	NaN
110.25	80.3	0.3	0.3	0	0	130	130	7.32	37	0.04	21	3.68	4	3.26	NaN	NaN	NaN	NaN	NaN	NaN	NaN	NaN	NaN	NaN	NaN	NaN	NaN	NaN	NaN	NaN	NaN	NaN	NaN	NaN	NaN	NaN	NaN
110.5	80.2	0.3	0.3	0	0	130	130	7.32	37	0.04	21	3.68	4	3.26	NaN	NaN	NaN	NaN	NaN	NaN	NaN	NaN	NaN	NaN	NaN	NaN	NaN	NaN	NaN	NaN	NaN	NaN	NaN	NaN	NaN	NaN	NaN
110.75	80.1	0.3	0.29	0	0	130	130	7.31	37	0.04	21	3.68	4	3.26	NaN	NaN	NaN	NaN	NaN	NaN	NaN	NaN	NaN	NaN	NaN	NaN	NaN	NaN	NaN	NaN	NaN	NaN	NaN	NaN	NaN	NaN	NaN
111	80	0.3	0.3	0	0	130	130	7.31	37	0.04	21	3.68	4	3.26	NaN	NaN	NaN	NaN	NaN	NaN	NaN	NaN	NaN	NaN	NaN	NaN	NaN	NaN	NaN	NaN	NaN	NaN	NaN	NaN	NaN	NaN	NaN
111.25	79.7	0.3	0.3	0	0	130	130	7.3	37	0.04	21	3.68	4	3.26	NaN	NaN	NaN	NaN	NaN	NaN	NaN	NaN	NaN	NaN	NaN	NaN	NaN	NaN	NaN	NaN	NaN	NaN	NaN	NaN	NaN	NaN	NaN
111.5	79.1	0.3	0.3	0	0	130	130	7.3	37	0.04	21	3.68	4	3.26	NaN	NaN	NaN	NaN	NaN	NaN	NaN	NaN	NaN	NaN	NaN	NaN	NaN	NaN	NaN	NaN	NaN	NaN	NaN	NaN	NaN	NaN	NaN
111.75	79.1	0.3	0.3	0	0	130	130	7.3	37	0.04	21	3.68	4	3.26	NaN	NaN	NaN	NaN	NaN	NaN	NaN	NaN	NaN	NaN	NaN	NaN	NaN	NaN	NaN	NaN	NaN	NaN	NaN	NaN	NaN	NaN	NaN
112	78.5	0.3	0.3	0	0	130	130	7.29	37	0.04	21	3.68	4	3.26	NaN	NaN	NaN	NaN	NaN	NaN	NaN	NaN	NaN	NaN	NaN	NaN	NaN	NaN	NaN	NaN	NaN	NaN	NaN	NaN	NaN	NaN	NaN
112.25	78.4	0.3	0.3	0	0	130	130	7.29	37	0.04	21	3.68	4	3.26	NaN	NaN	NaN	NaN	NaN	NaN	NaN	NaN	NaN	NaN	NaN	NaN	NaN	NaN	NaN	NaN	NaN	NaN	NaN	NaN	NaN	NaN	NaN
112.5	78.4	0.3	0.3	0	0	130	130	7.28	37	0.04	21	3.68	4	3.26	NaN	NaN	NaN	NaN	NaN	NaN	NaN	NaN	NaN	NaN	NaN	NaN	NaN	NaN	NaN	NaN	NaN	NaN	NaN	NaN	NaN	NaN	NaN
112.75	77.9	0.3	0.3	0	0	130	130	7.28	37	0.04	21	3.68	4	3.26	NaN	NaN	NaN	NaN	NaN	NaN	NaN	NaN	NaN	NaN	NaN	NaN	NaN	NaN	NaN	NaN	NaN	NaN	NaN	NaN	NaN	NaN	NaN
113	77.7	0.3	0.3	0	0	130	130	7.27	37	0.04	21	3.68	4	3.26	NaN	NaN	NaN	NaN	NaN	NaN	NaN	NaN	NaN	NaN	NaN	NaN	NaN	NaN	NaN	NaN	NaN	NaN	NaN	NaN	NaN	NaN	NaN
113.25	77.5	0.3	0.3	0	0	130	130	7.27	37	0.04	21	3.68	4	3.26	NaN	NaN	NaN	NaN	NaN	NaN	NaN	NaN	NaN	NaN	NaN	NaN	NaN	NaN	NaN	NaN	NaN	NaN	NaN	NaN	NaN	NaN	NaN
113.5	76.9	0.3	0.3	0	0	130	130	7.26	37	0.04	21	3.68	4	3.26	NaN	NaN	NaN	NaN	NaN	NaN	NaN	NaN	NaN	NaN	NaN	NaN	NaN	NaN	NaN	NaN	NaN	NaN	NaN	NaN	NaN	NaN	NaN
113.75	76.8	0.3	0.3	0	0	130	130	7.26	37	0.04	21	3.68	4	3.26	NaN	NaN	NaN	NaN	NaN	NaN	NaN	NaN	NaN	NaN	NaN	NaN	NaN	NaN	NaN	NaN	NaN	NaN	NaN	NaN	NaN	NaN	NaN
114	76.6	0.3	0.3	0	0	130	130	7.25	37	0.04	21	3.68	4	3.26	NaN	NaN	NaN	NaN	NaN	NaN	NaN	NaN	NaN	NaN	NaN	NaN	NaN	NaN	NaN	NaN	NaN	NaN	NaN	NaN	NaN	NaN	NaN
114.25	76.2	0.3	0.3	0	0	130	130	7.25	37	0.04	21	3.68	4	3.26	NaN	NaN	NaN	NaN	NaN	NaN	NaN	NaN	NaN	NaN	NaN	NaN	NaN	NaN	NaN	NaN	NaN	NaN	NaN	NaN	NaN	NaN	NaN
114.5	76	0.3	0.3	0	0	130	130	7.24	37	0.04	21	3.68	4	3.26	NaN	NaN	NaN	NaN	NaN	NaN	NaN	NaN	NaN	NaN	NaN	NaN	NaN	NaN	NaN	NaN	NaN	NaN	NaN	NaN	NaN	NaN	NaN
114.75	75.7	0.3	0.29	0	0	130	130	7.24	37	0.04	21	3.68	4	3.26	NaN	NaN	NaN	NaN	NaN	NaN	NaN	NaN	NaN	NaN	NaN	NaN	NaN	NaN	NaN	NaN	NaN	NaN	NaN	NaN	NaN	NaN	NaN
115	75.4	0.3	0.3	0	0	130	130	7.23	37	0.04	21	3.68	4	3.26	NaN	NaN	NaN	NaN	NaN	NaN	NaN	NaN	NaN	NaN	NaN	NaN	NaN	NaN	NaN	NaN	NaN	NaN	NaN	NaN	NaN	NaN	NaN
115.25	75.1	0.3	0.3	0	0	130	130	7.22	37	0.04	21	3.68	4	3.26	NaN	NaN	NaN	NaN	NaN	NaN	NaN	NaN	NaN	NaN	NaN	NaN	NaN	NaN	NaN	NaN	NaN	NaN	NaN	NaN	NaN	NaN	NaN
115.5	74.8	0.3	0.3	0	0	130	130	7.22	37	0.04	21	3.68	4	3.26	NaN	NaN	NaN	NaN	NaN	NaN	NaN	NaN	NaN	NaN	NaN	NaN	NaN	NaN	NaN	NaN	NaN	NaN	NaN	NaN	NaN	NaN	NaN
115.75	74.4	0.3	0.3	0	0	130	130	7.24	37	0.04	21	3.68	4	3.26	NaN	NaN	NaN	NaN	NaN	NaN	NaN	NaN	NaN	NaN	NaN	NaN	NaN	NaN	NaN	NaN	NaN	NaN	NaN	NaN	NaN	NaN	NaN
116	74.5	0.3	0.3	0	0	130	130	7.25	37	0.04	21	3.68	4	3.26	NaN	NaN	NaN	NaN	NaN	NaN	NaN	NaN	NaN	NaN	NaN	NaN	NaN	NaN	NaN	NaN	NaN	NaN	NaN	NaN	NaN	NaN	NaN
116.25	74.4	0.3	0.29	0	0	130	130	7.25	37	0.04	21	3.68	4	3.26	NaN	NaN	NaN	NaN	NaN	NaN	NaN	NaN	NaN	NaN	NaN	NaN	NaN	NaN	NaN	NaN	NaN	NaN	NaN	NaN	NaN	NaN	NaN
116.5	74.3	0.3	0.29	0	0	130	130	7.25	37	0.04	21	3.68	4	3.26	NaN	NaN	NaN	NaN	NaN	NaN	NaN	NaN	NaN	NaN	NaN	NaN	NaN	NaN	NaN	NaN	NaN	NaN	NaN	NaN	NaN	NaN	NaN
116.75	73.9	0.3	0.3	0	0	130	130	7.25	37	0.04	21	3.68	4	3.26	NaN	NaN	NaN	NaN	NaN	NaN	NaN	NaN	NaN	NaN	NaN	NaN	NaN	NaN	NaN	NaN	NaN	NaN	NaN	NaN	NaN	NaN	NaN
117	73.6	0.3	0.3	0	0	130	130	7.25	37	0.04	21	3.68	4	3.26	650	2.08	1.352	0	1	2	1.58	0.0752381	860000	724167	2.18182e-06	3.71582	196	2.04	22.848	3.81088	30.7194	0.0225769	NaN	NaN	NaN	NaN	NaN
117.25	73.4	0.3	0.3	0	0	130	130	7.25	37	0.04	21	3.68	4	3.26	NaN	NaN	NaN	NaN	NaN	NaN	NaN	NaN	NaN	NaN	NaN	NaN	NaN	NaN	NaN	NaN	NaN	NaN	NaN	NaN	NaN	NaN	NaN
117.5	73.5	0.3	0.3	0	0	130	130	7.24	37	0.04	21	3.68	4	3.26	NaN	NaN	NaN	NaN	NaN	NaN	NaN	NaN	NaN	NaN	NaN	NaN	NaN	NaN	NaN	NaN	NaN	NaN	NaN	NaN	NaN	NaN	NaN
117.75	74	0.3	0.3	0	0	130	130	7.25	37	0.04	21	3.68	4	3.26	NaN	NaN	NaN	NaN	NaN	NaN	NaN	NaN	NaN	NaN	NaN	NaN	NaN	NaN	NaN	NaN	NaN	NaN	NaN	NaN	NaN	NaN	NaN
118	74.1	0.3	0.3	0	0	130	130	7.24	37	0.04	21	3.68	4	3.26	NaN	NaN	NaN	NaN	NaN	NaN	NaN	NaN	NaN	NaN	NaN	NaN	NaN	NaN	NaN	NaN	NaN	NaN	NaN	NaN	NaN	NaN	NaN
118.25	74.1	0.3	0.3	0	0	130	130	7.25	37	0.04	21	3.68	4	3.26	NaN	NaN	NaN	NaN	NaN	NaN	NaN	NaN	NaN	NaN	NaN	NaN	NaN	NaN	NaN	NaN	NaN	NaN	NaN	NaN	NaN	NaN	NaN
118.5	74.2	0.3	0.3	0	0	130	130	7.25	37	0.04	21	3.68	4	3.26	NaN	NaN	NaN	NaN	NaN	NaN	NaN	NaN	NaN	NaN	NaN	NaN	NaN	NaN	NaN	NaN	NaN	NaN	NaN	NaN	NaN	NaN	NaN
118.75	74	0.3	0.3	0	0	130	130	7.25	37	0.04	21	3.68	4	3.26	NaN	NaN	NaN	NaN	NaN	NaN	NaN	NaN	NaN	NaN	NaN	NaN	NaN	NaN	NaN	NaN	NaN	NaN	NaN	NaN	NaN	NaN	NaN
119	74	0.3	0.3	0	0	130	130	7.25	37	0.04	21	3.68	4	3.26	NaN	NaN	NaN	NaN	NaN	NaN	NaN	NaN	NaN	NaN	NaN	NaN	NaN	NaN	NaN	NaN	NaN	NaN	NaN	NaN	NaN	NaN	NaN
119.25	73.4	0.3	0.3	0	0	130	130	7.25	37	0.04	21	3.68	4	3.26	NaN	NaN	NaN	NaN	NaN	NaN	NaN	NaN	NaN	NaN	NaN	NaN	NaN	NaN	NaN	NaN	NaN	NaN	NaN	NaN	NaN	NaN	NaN
119.5	73.1	0.3	0.3	0	0	130	130	7.25	37	0.04	21	3.68	4	3.26	NaN	NaN	NaN	NaN	NaN	NaN	NaN	NaN	NaN	NaN	NaN	NaN	NaN	NaN	NaN	NaN	NaN	NaN	NaN	NaN	NaN	NaN	NaN
119.75	72.9	0.3	0.3	0	0	130	130	7.24	37	0.04	21	3.68	4	3.26	NaN	NaN	NaN	NaN	NaN	NaN	NaN	NaN	NaN	NaN	NaN	NaN	NaN	NaN	NaN	NaN	NaN	NaN	NaN	NaN	NaN	NaN	NaN
0	129.7	0.3	0.27	0.02	0.01	80	80	7.44	36	7.2	21	15.77	20	6.34	700	2.85	2	0	2	2.85	0	0	430000	430000	0	0	0	0	0	0	0	0	1.27	1.27	0	0	3
0.25	116.9	0.3	0.27	0.03	0.01	80	80	7.47	36.8	8.5	21	15.77	20	6.34	NaN	NaN	NaN	NaN	NaN	NaN	NaN	NaN	NaN	NaN	NaN	NaN	NaN	NaN	NaN	NaN	NaN	NaN	NaN	NaN	NaN	NaN	NaN
0.5	109.7	0.3	0.27	0.02	0.01	80	80	7.43	37.6	8.06	21	15.77	20	6.34	NaN	NaN	NaN	NaN	NaN	NaN	NaN	NaN	NaN	NaN	NaN	NaN	NaN	NaN	NaN	NaN	NaN	NaN	NaN	NaN	NaN	NaN	NaN
0.75	104.6	0.27	0.25	0.02	0.01	80	80	7.41	37.1	7.56	21	15.77	20	6.34	NaN	NaN	NaN	NaN	NaN	NaN	NaN	NaN	NaN	NaN	NaN	NaN	NaN	NaN	NaN	NaN	NaN	NaN	NaN	NaN	NaN	NaN	NaN
1	99.2	0.3	0.3	0	0	80	80	7.39	37	0.04	21	15.77	20	6.34	NaN	NaN	NaN	NaN	NaN	NaN	NaN	NaN	NaN	NaN	NaN	NaN	NaN	NaN	NaN	NaN	NaN	NaN	NaN	NaN	NaN	NaN	NaN
1.25	94.7	0.3	0.3	0	0	80	80	7.39	37	0.04	21	15.77	20	6.34	NaN	NaN	NaN	NaN	NaN	NaN	NaN	NaN	NaN	NaN	NaN	NaN	NaN	NaN	NaN	NaN	NaN	NaN	NaN	NaN	NaN	NaN	NaN
1.5	91	0.3	0.3	0	0	80	80	7.39	37.1	0.04	21	15.77	20	6.34	NaN	NaN	NaN	NaN	NaN	NaN	NaN	NaN	NaN	NaN	NaN	NaN	NaN	NaN	NaN	NaN	NaN	NaN	NaN	NaN	NaN	NaN	NaN
1.75	88.1	0.3	0.3	0	0	80	80	7.4	37.1	0.04	21	15.77	20	6.34	NaN	NaN	NaN	NaN	NaN	NaN	NaN	NaN	NaN	NaN	NaN	NaN	NaN	NaN	NaN	NaN	NaN	NaN	NaN	NaN	NaN	NaN	NaN
2	84.9	0.3	0.3	0	0	80	80	7.41	37.1	0.23	21	15.77	20	6.34	NaN	NaN	NaN	NaN	NaN	NaN	NaN	NaN	NaN	NaN	NaN	NaN	NaN	NaN	NaN	NaN	NaN	NaN	NaN	NaN	NaN	NaN	NaN
2.25	83.5	0.3	0.3	0	0	80	80	7.42	37.1	0.6	21	15.77	20	6.34	NaN	NaN	NaN	NaN	NaN	NaN	NaN	NaN	NaN	NaN	NaN	NaN	NaN	NaN	NaN	NaN	NaN	NaN	NaN	NaN	NaN	NaN	NaN
2.5	83	0.3	0.29	0	0	80	80	7.43	37.1	1.06	21	15.77	20	6.34	NaN	NaN	NaN	NaN	NaN	NaN	NaN	NaN	NaN	NaN	NaN	NaN	NaN	NaN	NaN	NaN	NaN	NaN	NaN	NaN	NaN	NaN	NaN
2.75	82.5	0.3	0.29	0	0	80	80	7.43	37	1.36	21	15.77	20	6.34	NaN	NaN	NaN	NaN	NaN	NaN	NaN	NaN	NaN	NaN	NaN	NaN	NaN	NaN	NaN	NaN	NaN	NaN	NaN	NaN	NaN	NaN	NaN
3	82	0.3	0.29	0	0	80	80	7.44	37.1	1.58	21	15.77	20	6.34	NaN	NaN	NaN	NaN	NaN	NaN	NaN	NaN	NaN	NaN	NaN	NaN	NaN	NaN	NaN	NaN	NaN	NaN	NaN	NaN	NaN	NaN	NaN
3.25	81.5	0.3	0.29	0.01	0	80	80	7.44	37.1	3.41	21	15.77	20	6.34	NaN	NaN	NaN	NaN	NaN	NaN	NaN	NaN	NaN	NaN	NaN	NaN	NaN	NaN	NaN	NaN	NaN	NaN	NaN	NaN	NaN	NaN	NaN
3.5	80.7	0.3	0.28	0.01	0	80	80	7.44	37	3.94	21	15.77	20	6.34	NaN	NaN	NaN	NaN	NaN	NaN	NaN	NaN	NaN	NaN	NaN	NaN	NaN	NaN	NaN	NaN	NaN	NaN	NaN	NaN	NaN	NaN	NaN
3.75	80.8	0.3	0.28	0.01	0	80	80	7.44	37.1	4.38	21	15.77	20	6.34	NaN	NaN	NaN	NaN	NaN	NaN	NaN	NaN	NaN	NaN	NaN	NaN	NaN	NaN	NaN	NaN	NaN	NaN	NaN	NaN	NaN	NaN	NaN
4	81.3	0.3	0.28	0.01	0	80	80	7.43	37.1	4.66	21	15.77	20	6.34	NaN	NaN	NaN	NaN	NaN	NaN	NaN	NaN	NaN	NaN	NaN	NaN	NaN	NaN	NaN	NaN	NaN	NaN	NaN	NaN	NaN	NaN	NaN
4.25	79.2	0.3	0.28	0.01	0	80	80	7.41	37	4.76	21	15.77	20	6.34	NaN	NaN	NaN	NaN	NaN	NaN	NaN	NaN	NaN	NaN	NaN	NaN	NaN	NaN	NaN	NaN	NaN	NaN	NaN	NaN	NaN	NaN	NaN
4.5	78.2	0.3	0.28	0.01	0	80	80	7.4	37	4.72	21	15.77	20	6.34	NaN	NaN	NaN	NaN	NaN	NaN	NaN	NaN	NaN	NaN	NaN	NaN	NaN	NaN	NaN	NaN	NaN	NaN	NaN	NaN	NaN	NaN	NaN
4.75	80.8	0.3	0.28	0.01	0	80	80	7.39	37	4.89	21	15.77	20	6.34	NaN	NaN	NaN	NaN	NaN	NaN	NaN	NaN	NaN	NaN	NaN	NaN	NaN	NaN	NaN	NaN	NaN	NaN	NaN	NaN	NaN	NaN	NaN
5	80.6	0.3	0.28	0.01	0	80	80	7.38	37	4.83	21	15.77	20	6.34	NaN	NaN	NaN	NaN	NaN	NaN	NaN	NaN	NaN	NaN	NaN	NaN	NaN	NaN	NaN	NaN	NaN	NaN	NaN	NaN	NaN	NaN	NaN
5.25	80	0.3	0.28	0.01	0	80	80	7.37	37	4.7	21	15.77	20	6.34	NaN	NaN	NaN	NaN	NaN	NaN	NaN	NaN	NaN	NaN	NaN	NaN	NaN	NaN	NaN	NaN	NaN	NaN	NaN	NaN	NaN	NaN	NaN
5.5	77.7	0.3	0.28	0.01	0	80	80	7.36	37	4.55	21	15.77	20	6.34	NaN	NaN	NaN	NaN	NaN	NaN	NaN	NaN	NaN	NaN	NaN	NaN	NaN	NaN	NaN	NaN	NaN	NaN	NaN	NaN	NaN	NaN	NaN
5.75	77.9	0.3	0.3	0	0	80	80	7.35	37	0.04	21	15.77	20	6.34	NaN	NaN	NaN	NaN	NaN	NaN	NaN	NaN	NaN	NaN	NaN	NaN	NaN	NaN	NaN	NaN	NaN	NaN	NaN	NaN	NaN	NaN	NaN
6	77.4	0.3	0.3	0	0	80	80	7.35	37	0.06	21	15.77	20	6.34	NaN	NaN	NaN	NaN	NaN	NaN	NaN	NaN	NaN	NaN	NaN	NaN	NaN	NaN	NaN	NaN	NaN	NaN	NaN	NaN	NaN	NaN	NaN
6.25	75.4	0.3	0.3	0	0	80	80	7.36	37	0.21	21	15.77	20	6.34	NaN	NaN	NaN	NaN	NaN	NaN	NaN	NaN	NaN	NaN	NaN	NaN	NaN	NaN	NaN	NaN	NaN	NaN	NaN	NaN	NaN	NaN	NaN
6.5	73.8	0.3	0.3	0	0	80	80	7.36	37	0.44	21	15.77	20	6.34	NaN	NaN	NaN	NaN	NaN	NaN	NaN	NaN	NaN	NaN	NaN	NaN	NaN	NaN	NaN	NaN	NaN	NaN	NaN	NaN	NaN	NaN	NaN
6.75	72.7	0.3	0.29	0	0	80	80	7.37	37	0.78	21	15.77	20	6.34	NaN	NaN	NaN	NaN	NaN	NaN	NaN	NaN	NaN	NaN	NaN	NaN	NaN	NaN	NaN	NaN	NaN	NaN	NaN	NaN	NaN	NaN	NaN
7	71.4	0.3	0.29	0	0	80	80	7.38	37	1.18	21	15.77	20	6.34	NaN	NaN	NaN	NaN	NaN	NaN	NaN	NaN	NaN	NaN	NaN	NaN	NaN	NaN	NaN	NaN	NaN	NaN	NaN	NaN	NaN	NaN	NaN
7.25	69.6	0.3	0.29	0	0	80	80	7.39	37	1.49	21	15.77	20	6.34	NaN	NaN	NaN	NaN	NaN	NaN	NaN	NaN	NaN	NaN	NaN	NaN	NaN	NaN	NaN	NaN	NaN	NaN	NaN	NaN	NaN	NaN	NaN
7.5	68.2	0.3	0.29	0.01	0	80	80	7.39	37	1.79	21	15.77	20	6.34	NaN	NaN	NaN	NaN	NaN	NaN	NaN	NaN	NaN	NaN	NaN	NaN	NaN	NaN	NaN	NaN	NaN	NaN	NaN	NaN	NaN	NaN	NaN
7.75	66.5	0.29	0.29	0.01	0	80	80	7.39	37	2.21	21	15.77	20	6.34	NaN	NaN	NaN	NaN	NaN	NaN	NaN	NaN	NaN	NaN	NaN	NaN	NaN	NaN	NaN	NaN	NaN	NaN	NaN	NaN	NaN	NaN	NaN
8	65.2	0.3	0.29	0.01	0	80	80	7.39	37	2.35	21	15.77	20	6.34	NaN	NaN	NaN	NaN	NaN	NaN	NaN	NaN	NaN	NaN	NaN	NaN	NaN	NaN	NaN	NaN	NaN	NaN	NaN	NaN	NaN	NaN	NaN
8.25	63.9	0.3	0.29	0.01	0	80	80	7.39	37	2.67	21	15.77	20	6.34	NaN	NaN	NaN	NaN	NaN	NaN	NaN	NaN	NaN	NaN	NaN	NaN	NaN	NaN	NaN	NaN	NaN	NaN	NaN	NaN	NaN	NaN	NaN
8.5	62.4	0.3	0.29	0.01	0	80	80	7.39	37	2.73	21	15.77	20	6.34	NaN	NaN	NaN	NaN	NaN	NaN	NaN	NaN	NaN	NaN	NaN	NaN	NaN	NaN	NaN	NaN	NaN	NaN	NaN	NaN	NaN	NaN	NaN
8.75	62	0.3	0.29	0.01	0	80	80	7.39	37	3.01	21	15.77	20	6.34	NaN	NaN	NaN	NaN	NaN	NaN	NaN	NaN	NaN	NaN	NaN	NaN	NaN	NaN	NaN	NaN	NaN	NaN	NaN	NaN	NaN	NaN	NaN
9	62.9	0.3	0.29	0.01	0	80	80	7.38	37	2.96	21	15.77	20	6.34	NaN	NaN	NaN	NaN	NaN	NaN	NaN	NaN	NaN	NaN	NaN	NaN	NaN	NaN	NaN	NaN	NaN	NaN	NaN	NaN	NaN	NaN	NaN
9.25	63.9	0.3	0.29	0.01	0	80	80	7.38	37	3.12	21	15.77	20	6.34	NaN	NaN	NaN	NaN	NaN	NaN	NaN	NaN	NaN	NaN	NaN	NaN	NaN	NaN	NaN	NaN	NaN	NaN	NaN	NaN	NaN	NaN	NaN
9.5	62.6	0.3	0.29	0.01	0	80	80	7.38	37	3.34	21	15.77	20	6.34	NaN	NaN	NaN	NaN	NaN	NaN	NaN	NaN	NaN	NaN	NaN	NaN	NaN	NaN	NaN	NaN	NaN	NaN	NaN	NaN	NaN	NaN	NaN
9.75	63.2	0.3	0.29	0.01	0	80	80	7.37	37	3.18	21	15.77	20	6.34	NaN	NaN	NaN	NaN	NaN	NaN	NaN	NaN	NaN	NaN	NaN	NaN	NaN	NaN	NaN	NaN	NaN	NaN	NaN	NaN	NaN	NaN	NaN
10	63.5	0.3	0.28	0.01	0	80	80	7.37	37	3.33	21	15.77	20	6.34	NaN	NaN	NaN	NaN	NaN	NaN	NaN	NaN	NaN	NaN	NaN	NaN	NaN	NaN	NaN	NaN	NaN	NaN	NaN	NaN	NaN	NaN	NaN
10.25	64	0.3	0.29	0.01	0	80	80	7.36	37	3.2	21	15.77	20	6.34	NaN	NaN	NaN	NaN	NaN	NaN	NaN	NaN	NaN	NaN	NaN	NaN	NaN	NaN	NaN	NaN	NaN	NaN	NaN	NaN	NaN	NaN	NaN
10.5	65.5	0.3	0.29	0.01	0	80	80	7.36	37	3.21	21	15.77	20	6.34	NaN	NaN	NaN	NaN	NaN	NaN	NaN	NaN	NaN	NaN	NaN	NaN	NaN	NaN	NaN	NaN	NaN	NaN	NaN	NaN	NaN	NaN	NaN
10.75	65.7	0.3	0.29	0.01	0	80	80	7.36	37	3.34	21	15.77	20	6.34	NaN	NaN	NaN	NaN	NaN	NaN	NaN	NaN	NaN	NaN	NaN	NaN	NaN	NaN	NaN	NaN	NaN	NaN	NaN	NaN	NaN	NaN	NaN
11	65.6	0.3	0.3	0	0	80	80	7.35	37	0.04	21	15.77	20	6.34	NaN	NaN	NaN	NaN	NaN	NaN	NaN	NaN	NaN	NaN	NaN	NaN	NaN	NaN	NaN	NaN	NaN	NaN	NaN	NaN	NaN	NaN	NaN
11.25	64.2	0.3	0.3	0	0	80	80	7.35	37	0.04	21	15.77	20	6.34	NaN	NaN	NaN	NaN	NaN	NaN	NaN	NaN	NaN	NaN	NaN	NaN	NaN	NaN	NaN	NaN	NaN	NaN	NaN	NaN	NaN	NaN	NaN
11.5	63.6	0.3	0.3	0	0	80	80	7.36	37	0.13	21	15.77	20	6.34	NaN	NaN	NaN	NaN	NaN	NaN	NaN	NaN	NaN	NaN	NaN	NaN	NaN	NaN	NaN	NaN	NaN	NaN	NaN	NaN	NaN	NaN	NaN
11.75	64.2	0.3	0.3	0	0	80	80	7.36	37	0.41	21	15.77	20	6.34	NaN	NaN	NaN	NaN	NaN	NaN	NaN	NaN	NaN	NaN	NaN	NaN	NaN	NaN	NaN	NaN	NaN	NaN	NaN	NaN	NaN	NaN	NaN
12	66.3	0.3	0.3	0	0	80	80	7.37	37	0.75	21	15.77	20	6.34	NaN	NaN	NaN	NaN	NaN	NaN	NaN	NaN	NaN	NaN	NaN	NaN	NaN	NaN	NaN	NaN	NaN	NaN	NaN	NaN	NaN	NaN	NaN
12.25	66.1	0.3	0.29	0	0	80	80	7.38	37	1.11	21	15.77	20	6.34	NaN	NaN	NaN	NaN	NaN	NaN	NaN	NaN	NaN	NaN	NaN	NaN	NaN	NaN	NaN	NaN	NaN	NaN	NaN	NaN	NaN	NaN	NaN
12.5	66.3	0.3	0.29	0	0	80	80	7.39	37	1.58	21	15.77	20	6.34	NaN	NaN	NaN	NaN	NaN	NaN	NaN	NaN	NaN	NaN	NaN	NaN	NaN	NaN	NaN	NaN	NaN	NaN	NaN	NaN	NaN	NaN	NaN
12.75	67	0.3	0.29	0.01	0	80	80	7.4	37	2.1	21	15.77	20	6.34	NaN	NaN	NaN	NaN	NaN	NaN	NaN	NaN	NaN	NaN	NaN	NaN	NaN	NaN	NaN	NaN	NaN	NaN	NaN	NaN	NaN	NaN	NaN
13	66.4	0.3	0.29	0.01	0	80	80	7.4	37	2.29	21	15.77	20	6.34	NaN	NaN	NaN	NaN	NaN	NaN	NaN	NaN	NaN	NaN	NaN	NaN	NaN	NaN	NaN	NaN	NaN	NaN	NaN	NaN	NaN	NaN	NaN
13.25	65	0.3	0.29	0.01	0	80	80	7.39	37	2.49	21	15.77	20	6.34	NaN	NaN	NaN	NaN	NaN	NaN	NaN	NaN	NaN	NaN	NaN	NaN	NaN	NaN	NaN	NaN	NaN	NaN	NaN	NaN	NaN	NaN	NaN
13.5	67.2	0.3	0.29	0.01	0	80	80	7.4	37	2.86	21	15.77	20	6.34	NaN	NaN	NaN	NaN	NaN	NaN	NaN	NaN	NaN	NaN	NaN	NaN	NaN	NaN	NaN	NaN	NaN	NaN	NaN	NaN	NaN	NaN	NaN
13.75	67	0.3	0.29	0.01	0	80	80	7.39	37	3.01	21	15.77	20	6.34	NaN	NaN	NaN	NaN	NaN	NaN	NaN	NaN	NaN	NaN	NaN	NaN	NaN	NaN	NaN	NaN	NaN	NaN	NaN	NaN	NaN	NaN	NaN
14	65.5	0.3	0.29	0.01	0	80	80	7.39	37	3.21	21	15.77	20	6.34	NaN	NaN	NaN	NaN	NaN	NaN	NaN	NaN	NaN	NaN	NaN	NaN	NaN	NaN	NaN	NaN	NaN	NaN	NaN	NaN	NaN	NaN	NaN
14.25	64.2	0.3	0.29	0.01	0	80	80	7.38	37	3.1	21	15.77	20	6.34	NaN	NaN	NaN	NaN	NaN	NaN	NaN	NaN	NaN	NaN	NaN	NaN	NaN	NaN	NaN	NaN	NaN	NaN	NaN	NaN	NaN	NaN	NaN
14.5	64	0.31	0.3	0.01	0	80	80	7.37	37	3.18	21	15.77	20	6.34	NaN	NaN	NaN	NaN	NaN	NaN	NaN	NaN	NaN	NaN	NaN	NaN	NaN	NaN	NaN	NaN	NaN	NaN	NaN	NaN	NaN	NaN	NaN
14.75	68.3	0.3	0.29	0.01	0	80	80	7.37	37	3.33	21	15.77	20	6.34	NaN	NaN	NaN	NaN	NaN	NaN	NaN	NaN	NaN	NaN	NaN	NaN	NaN	NaN	NaN	NaN	NaN	NaN	NaN	NaN	NaN	NaN	NaN
15	68.4	0.3	0.29	0.01	0	80	80	7.37	37	3.31	21	15.77	20	6.34	NaN	NaN	NaN	NaN	NaN	NaN	NaN	NaN	NaN	NaN	NaN	NaN	NaN	NaN	NaN	NaN	NaN	NaN	NaN	NaN	NaN	NaN	NaN
15.25	66.8	0.3	0.29	0.01	0	80	80	7.36	37	3.21	21	15.77	20	6.34	NaN	NaN	NaN	NaN	NaN	NaN	NaN	NaN	NaN	NaN	NaN	NaN	NaN	NaN	NaN	NaN	NaN	NaN	NaN	NaN	NaN	NaN	NaN
15.5	65.9	0.3	0.29	0.01	0	80	80	7.35	37	0.05	21	15.77	20	6.34	NaN	NaN	NaN	NaN	NaN	NaN	NaN	NaN	NaN	NaN	NaN	NaN	NaN	NaN	NaN	NaN	NaN	NaN	NaN	NaN	NaN	NaN	NaN
15.75	63.8	0.3	0.3	0	0	80	80	7.35	37	0.05	21	15.77	20	6.34	NaN	NaN	NaN	NaN	NaN	NaN	NaN	NaN	NaN	NaN	NaN	NaN	NaN	NaN	NaN	NaN	NaN	NaN	NaN	NaN	NaN	NaN	NaN
16	63.6	0.3	0.3	0	0	80	80	7.36	37	0.18	21	15.77	20	6.34	NaN	NaN	NaN	NaN	NaN	NaN	NaN	NaN	NaN	NaN	NaN	NaN	NaN	NaN	NaN	NaN	NaN	NaN	NaN	NaN	NaN	NaN	NaN
16.25	64.1	0.3	0.3	0	0	80	80	7.36	37	0.44	21	15.77	20	6.34	NaN	NaN	NaN	NaN	NaN	NaN	NaN	NaN	NaN	NaN	NaN	NaN	NaN	NaN	NaN	NaN	NaN	NaN	NaN	NaN	NaN	NaN	NaN
16.5	64.9	0.3	0.3	0	0	80	80	7.36	37	0.46	21	15.77	20	6.34	NaN	NaN	NaN	NaN	NaN	NaN	NaN	NaN	NaN	NaN	NaN	NaN	NaN	NaN	NaN	NaN	NaN	NaN	NaN	NaN	NaN	NaN	NaN
16.75	65.1	0.3	0.3	0	0	80	80	7.36	37	0.6	21	15.77	20	6.34	NaN	NaN	NaN	NaN	NaN	NaN	NaN	NaN	NaN	NaN	NaN	NaN	NaN	NaN	NaN	NaN	NaN	NaN	NaN	NaN	NaN	NaN	NaN
17	65	0.3	0.3	0	0	80	80	7.37	37	0.76	21	15.77	20	6.34	NaN	NaN	NaN	NaN	NaN	NaN	NaN	NaN	NaN	NaN	NaN	NaN	NaN	NaN	NaN	NaN	NaN	NaN	NaN	NaN	NaN	NaN	NaN
17.25	64.9	0.3	0.29	0	0	80	80	7.37	37	1.05	21	15.77	20	6.34	NaN	NaN	NaN	NaN	NaN	NaN	NaN	NaN	NaN	NaN	NaN	NaN	NaN	NaN	NaN	NaN	NaN	NaN	NaN	NaN	NaN	NaN	NaN
17.5	63.4	0.3	0.29	0	0	80	80	7.38	37	1.3	21	15.77	20	6.34	NaN	NaN	NaN	NaN	NaN	NaN	NaN	NaN	NaN	NaN	NaN	NaN	NaN	NaN	NaN	NaN	NaN	NaN	NaN	NaN	NaN	NaN	NaN
17.75	60.6	0.3	0.29	0	0	80	80	7.38	37	1.51	21	15.77	20	6.34	NaN	NaN	NaN	NaN	NaN	NaN	NaN	NaN	NaN	NaN	NaN	NaN	NaN	NaN	NaN	NaN	NaN	NaN	NaN	NaN	NaN	NaN	NaN
18	59.9	0.3	0.29	0	0	80	80	7.37	37	1.44	21	15.77	20	6.34	NaN	NaN	NaN	NaN	NaN	NaN	NaN	NaN	NaN	NaN	NaN	NaN	NaN	NaN	NaN	NaN	NaN	NaN	NaN	NaN	NaN	NaN	NaN
18.25	60	0.3	0.29	0	0	80	80	7.37	37	1.56	21	15.77	20	6.34	NaN	NaN	NaN	NaN	NaN	NaN	NaN	NaN	NaN	NaN	NaN	NaN	NaN	NaN	NaN	NaN	NaN	NaN	NaN	NaN	NaN	NaN	NaN
18.5	61.1	0.3	0.29	0.01	0	80	80	7.37	37	1.79	21	15.77	20	6.34	NaN	NaN	NaN	NaN	NaN	NaN	NaN	NaN	NaN	NaN	NaN	NaN	NaN	NaN	NaN	NaN	NaN	NaN	NaN	NaN	NaN	NaN	NaN
18.75	62.3	0.3	0.29	0.01	0	80	80	7.38	37	2.1	21	15.77	20	6.34	NaN	NaN	NaN	NaN	NaN	NaN	NaN	NaN	NaN	NaN	NaN	NaN	NaN	NaN	NaN	NaN	NaN	NaN	NaN	NaN	NaN	NaN	NaN
19	64.5	0.3	0.29	0.01	0	80	80	7.36	37	1.85	21	15.77	20	6.34	NaN	NaN	NaN	NaN	NaN	NaN	NaN	NaN	NaN	NaN	NaN	NaN	NaN	NaN	NaN	NaN	NaN	NaN	NaN	NaN	NaN	NaN	NaN
19.25	64.8	0.3	0.29	0.01	0	80	80	7.36	37	1.88	21	15.77	20	6.34	NaN	NaN	NaN	NaN	NaN	NaN	NaN	NaN	NaN	NaN	NaN	NaN	NaN	NaN	NaN	NaN	NaN	NaN	NaN	NaN	NaN	NaN	NaN
19.5	65.1	0.3	0.29	0.01	0	80	80	7.36	37	1.95	21	15.77	20	6.34	NaN	NaN	NaN	NaN	NaN	NaN	NaN	NaN	NaN	NaN	NaN	NaN	NaN	NaN	NaN	NaN	NaN	NaN	NaN	NaN	NaN	NaN	NaN
19.75	65.3	0.3	0.29	0.01	0	80	80	7.37	37	2.13	21	15.77	20	6.34	NaN	NaN	NaN	NaN	NaN	NaN	NaN	NaN	NaN	NaN	NaN	NaN	NaN	NaN	NaN	NaN	NaN	NaN	NaN	NaN	NaN	NaN	NaN
20	64.6	0.3	0.29	0.01	0	80	80	7.35	37	1.89	21	15.77	20	6.34	NaN	NaN	NaN	NaN	NaN	NaN	NaN	NaN	NaN	NaN	NaN	NaN	NaN	NaN	NaN	NaN	NaN	NaN	NaN	NaN	NaN	NaN	NaN
20.25	63.3	0.3	0.3	0	0	80	80	7.35	37	0.04	21	15.77	20	6.34	NaN	NaN	NaN	NaN	NaN	NaN	NaN	NaN	NaN	NaN	NaN	NaN	NaN	NaN	NaN	NaN	NaN	NaN	NaN	NaN	NaN	NaN	NaN
20.5	61.4	0.3	0.3	0	0	80	80	7.35	37	0.04	21	15.77	20	6.34	NaN	NaN	NaN	NaN	NaN	NaN	NaN	NaN	NaN	NaN	NaN	NaN	NaN	NaN	NaN	NaN	NaN	NaN	NaN	NaN	NaN	NaN	NaN
20.75	61.3	0.3	0.3	0	0	80	80	7.35	37	0.04	21	15.77	20	6.34	NaN	NaN	NaN	NaN	NaN	NaN	NaN	NaN	NaN	NaN	NaN	NaN	NaN	NaN	NaN	NaN	NaN	NaN	NaN	NaN	NaN	NaN	NaN
21	62.2	0.3	0.3	0	0	80	80	7.36	37	0.14	21	15.77	20	6.34	690	2.34	1.6146	0	2	2	0.511951	0.0243786	NaN	495833	1.03251e-06	0.511951	171	0.8	8.96	0.205519	102.24	0.00678355	NaN	NaN	NaN	NaN	NaN
21.25	60.9	0.3	0.3	0	0	80	80	7.36	37	0.25	21	15.77	20	6.34	NaN	NaN	NaN	NaN	NaN	NaN	NaN	NaN	NaN	NaN	NaN	NaN	NaN	NaN	NaN	NaN	NaN	NaN	NaN	NaN	NaN	NaN	NaN
21.5	60.4	0.3	0.3	0	0	80	80	7.36	37	0.41	21	15.77	20	6.34	NaN	NaN	NaN	NaN	NaN	NaN	NaN	NaN	NaN	NaN	NaN	NaN	NaN	NaN	NaN	NaN	NaN	NaN	NaN	NaN	NaN	NaN	NaN
21.75	61.6	0.3	0.29	0	0	80	80	7.37	37	0.72	21	15.77	20	6.34	NaN	NaN	NaN	NaN	NaN	NaN	NaN	NaN	NaN	NaN	NaN	NaN	NaN	NaN	NaN	NaN	NaN	NaN	NaN	NaN	NaN	NaN	NaN
22	62.6	0.3	0.29	0	0	80	80	7.38	37	0.98	21	15.77	20	6.34	NaN	NaN	NaN	NaN	NaN	NaN	NaN	NaN	NaN	NaN	NaN	NaN	NaN	NaN	NaN	NaN	NaN	NaN	NaN	NaN	NaN	NaN	NaN
22.25	62.1	0.3	0.29	0	0	80	80	7.38	37	1.23	21	15.77	20	6.34	NaN	NaN	NaN	NaN	NaN	NaN	NaN	NaN	NaN	NaN	NaN	NaN	NaN	NaN	NaN	NaN	NaN	NaN	NaN	NaN	NaN	NaN	NaN
22.5	60.9	0.3	0.29	0	0	80	80	7.38	37	1.48	21	15.77	20	6.34	NaN	NaN	NaN	NaN	NaN	NaN	NaN	NaN	NaN	NaN	NaN	NaN	NaN	NaN	NaN	NaN	NaN	NaN	NaN	NaN	NaN	NaN	NaN
22.75	61.6	0.3	0.29	0.01	0	80	80	7.39	37	1.81	21	15.77	20	6.34	NaN	NaN	NaN	NaN	NaN	NaN	NaN	NaN	NaN	NaN	NaN	NaN	NaN	NaN	NaN	NaN	NaN	NaN	NaN	NaN	NaN	NaN	NaN
23	62.3	0.3	0.29	0	0	80	80	7.37	37	1.66	21	15.77	20	6.34	NaN	NaN	NaN	NaN	NaN	NaN	NaN	NaN	NaN	NaN	NaN	NaN	NaN	NaN	NaN	NaN	NaN	NaN	NaN	NaN	NaN	NaN	NaN
23.25	63.1	0.3	0.29	0	0	80	80	7.36	37	1.6	21	15.77	20	6.34	NaN	NaN	NaN	NaN	NaN	NaN	NaN	NaN	NaN	NaN	NaN	NaN	NaN	NaN	NaN	NaN	NaN	NaN	NaN	NaN	NaN	NaN	NaN
23.5	62.2	0.3	0.29	0	0	80	80	7.36	37	1.61	21	15.77	20	6.34	NaN	NaN	NaN	NaN	NaN	NaN	NaN	NaN	NaN	NaN	NaN	NaN	NaN	NaN	NaN	NaN	NaN	NaN	NaN	NaN	NaN	NaN	NaN
23.75	61.8	0.3	0.29	0.01	0	80	80	7.36	37	1.71	21	15.77	20	6.34	NaN	NaN	NaN	NaN	NaN	NaN	NaN	NaN	NaN	NaN	NaN	NaN	NaN	NaN	NaN	NaN	NaN	NaN	NaN	NaN	NaN	NaN	NaN
24	61	0.3	0.29	0.01	0	80	80	7.36	37	1.79	21	15.77	20	6.34	NaN	NaN	NaN	NaN	NaN	NaN	NaN	NaN	NaN	NaN	NaN	NaN	NaN	NaN	NaN	NaN	NaN	NaN	NaN	NaN	NaN	NaN	NaN
24.25	60.9	0.3	0.3	0	0	80	80	7.35	37	0.04	21	15.77	20	6.34	NaN	NaN	NaN	NaN	NaN	NaN	NaN	NaN	NaN	NaN	NaN	NaN	NaN	NaN	NaN	NaN	NaN	NaN	NaN	NaN	NaN	NaN	NaN
24.5	66.8	0.3	0.3	0	0	130	130	7.35	37	0.04	21	15.77	20	6.34	NaN	NaN	NaN	NaN	NaN	NaN	NaN	NaN	NaN	NaN	NaN	NaN	NaN	NaN	NaN	NaN	NaN	NaN	NaN	NaN	NaN	NaN	NaN
24.75	71.7	0.3	0.3	0	0	130	130	7.35	37	0.04	21	15.77	20	6.34	NaN	NaN	NaN	NaN	NaN	NaN	NaN	NaN	NaN	NaN	NaN	NaN	NaN	NaN	NaN	NaN	NaN	NaN	NaN	NaN	NaN	NaN	NaN
25	73.3	0.3	0.3	0	0	130	130	7.35	37	0.06	21	15.77	20	6.34	NaN	NaN	NaN	NaN	NaN	NaN	NaN	NaN	NaN	NaN	NaN	NaN	NaN	NaN	NaN	NaN	NaN	NaN	NaN	NaN	NaN	NaN	NaN
25.25	75.2	0.3	0.3	0	0	130	130	7.36	37	0.23	21	15.77	20	6.34	NaN	NaN	NaN	NaN	NaN	NaN	NaN	NaN	NaN	NaN	NaN	NaN	NaN	NaN	NaN	NaN	NaN	NaN	NaN	NaN	NaN	NaN	NaN
25.5	76.7	0.3	0.3	0	0	130	130	7.36	37	0.41	21	15.77	20	6.34	NaN	NaN	NaN	NaN	NaN	NaN	NaN	NaN	NaN	NaN	NaN	NaN	NaN	NaN	NaN	NaN	NaN	NaN	NaN	NaN	NaN	NaN	NaN
25.75	78.5	0.3	0.3	0	0	130	130	7.37	37	0.65	21	15.77	20	6.34	NaN	NaN	NaN	NaN	NaN	NaN	NaN	NaN	NaN	NaN	NaN	NaN	NaN	NaN	NaN	NaN	NaN	NaN	NaN	NaN	NaN	NaN	NaN
26	75.4	0.3	0.3	0	0	130	130	7.37	37	0.76	21	15.77	20	6.34	NaN	NaN	NaN	NaN	NaN	NaN	NaN	NaN	NaN	NaN	NaN	NaN	NaN	NaN	NaN	NaN	NaN	NaN	NaN	NaN	NaN	NaN	NaN
26.25	74	0.3	0.29	0	0	130	130	7.37	37	0.96	21	15.77	20	6.34	NaN	NaN	NaN	NaN	NaN	NaN	NaN	NaN	NaN	NaN	NaN	NaN	NaN	NaN	NaN	NaN	NaN	NaN	NaN	NaN	NaN	NaN	NaN
26.5	75.5	0.3	0.29	0	0	130	130	7.38	37	1.23	21	15.77	20	6.34	NaN	NaN	NaN	NaN	NaN	NaN	NaN	NaN	NaN	NaN	NaN	NaN	NaN	NaN	NaN	NaN	NaN	NaN	NaN	NaN	NaN	NaN	NaN
26.75	74.4	0.3	0.29	0	0	130	130	7.38	37	1.44	21	15.77	20	6.34	NaN	NaN	NaN	NaN	NaN	NaN	NaN	NaN	NaN	NaN	NaN	NaN	NaN	NaN	NaN	NaN	NaN	NaN	NaN	NaN	NaN	NaN	NaN
27	76	0.3	0.29	0.01	0	130	130	7.38	37	1.75	21	15.77	20	6.34	NaN	NaN	NaN	NaN	NaN	NaN	NaN	NaN	NaN	NaN	NaN	NaN	NaN	NaN	NaN	NaN	NaN	NaN	NaN	NaN	NaN	NaN	NaN
27.25	76.7	0.3	0.29	0	0	130	130	7.37	37	1.51	21	15.77	20	6.34	NaN	NaN	NaN	NaN	NaN	NaN	NaN	NaN	NaN	NaN	NaN	NaN	NaN	NaN	NaN	NaN	NaN	NaN	NaN	NaN	NaN	NaN	NaN
27.5	79.7	0.3	0.29	0	0	130	130	7.36	37	1.36	21	15.77	20	6.34	NaN	NaN	NaN	NaN	NaN	NaN	NaN	NaN	NaN	NaN	NaN	NaN	NaN	NaN	NaN	NaN	NaN	NaN	NaN	NaN	NaN	NaN	NaN
27.75	80.3	0.3	0.29	0	0	130	130	7.35	37	1.29	21	15.77	20	6.34	NaN	NaN	NaN	NaN	NaN	NaN	NaN	NaN	NaN	NaN	NaN	NaN	NaN	NaN	NaN	NaN	NaN	NaN	NaN	NaN	NaN	NaN	NaN
28	80.1	0.3	0.29	0	0	130	130	7.35	37	1.34	21	15.77	20	6.34	NaN	NaN	NaN	NaN	NaN	NaN	NaN	NaN	NaN	NaN	NaN	NaN	NaN	NaN	NaN	NaN	NaN	NaN	NaN	NaN	NaN	NaN	NaN
28.25	78.9	0.3	0.29	0	0	130	130	7.35	37	1.38	21	15.77	20	6.34	NaN	NaN	NaN	NaN	NaN	NaN	NaN	NaN	NaN	NaN	NaN	NaN	NaN	NaN	NaN	NaN	NaN	NaN	NaN	NaN	NaN	NaN	NaN
28.5	78.3	0.3	0.29	0	0	130	130	7.36	37	1.47	21	15.77	20	6.34	NaN	NaN	NaN	NaN	NaN	NaN	NaN	NaN	NaN	NaN	NaN	NaN	NaN	NaN	NaN	NaN	NaN	NaN	NaN	NaN	NaN	NaN	NaN
28.75	78.2	0.3	0.3	0	0	130	130	7.33	37	0.04	21	15.77	20	6.34	NaN	NaN	NaN	NaN	NaN	NaN	NaN	NaN	NaN	NaN	NaN	NaN	NaN	NaN	NaN	NaN	NaN	NaN	NaN	NaN	NaN	NaN	NaN
29	77.7	0.3	0.3	0	0	130	130	7.33	37	0.04	21	15.77	20	6.34	NaN	NaN	NaN	NaN	NaN	NaN	NaN	NaN	NaN	NaN	NaN	NaN	NaN	NaN	NaN	NaN	NaN	NaN	NaN	NaN	NaN	NaN	NaN
29.25	77.9	0.3	0.3	0	0	130	130	7.33	37	0.04	21	15.77	20	6.34	NaN	NaN	NaN	NaN	NaN	NaN	NaN	NaN	NaN	NaN	NaN	NaN	NaN	NaN	NaN	NaN	NaN	NaN	NaN	NaN	NaN	NaN	NaN
29.5	77.7	0.3	0.3	0	0	130	130	7.33	37	0.04	21	15.77	20	6.34	NaN	NaN	NaN	NaN	NaN	NaN	NaN	NaN	NaN	NaN	NaN	NaN	NaN	NaN	NaN	NaN	NaN	NaN	NaN	NaN	NaN	NaN	NaN
29.75	76.4	0.3	0.3	0	0	130	130	7.33	37	0.04	21	15.77	20	6.34	NaN	NaN	NaN	NaN	NaN	NaN	NaN	NaN	NaN	NaN	NaN	NaN	NaN	NaN	NaN	NaN	NaN	NaN	NaN	NaN	NaN	NaN	NaN
30	75.2	0.3	0.3	0	0	130	130	7.33	37	0.04	21	15.77	20	6.34	NaN	NaN	NaN	NaN	NaN	NaN	NaN	NaN	NaN	NaN	NaN	NaN	NaN	NaN	NaN	NaN	NaN	NaN	NaN	NaN	NaN	NaN	NaN
30.25	75.5	0.3	0.3	0	0	130	130	7.33	37	0.04	21	15.77	20	6.34	NaN	NaN	NaN	NaN	NaN	NaN	NaN	NaN	NaN	NaN	NaN	NaN	NaN	NaN	NaN	NaN	NaN	NaN	NaN	NaN	NaN	NaN	NaN
30.5	76.1	0.3	0.3	0	0	130	130	7.34	37	0.04	21	15.77	20	6.34	NaN	NaN	NaN	NaN	NaN	NaN	NaN	NaN	NaN	NaN	NaN	NaN	NaN	NaN	NaN	NaN	NaN	NaN	NaN	NaN	NaN	NaN	NaN
30.75	77	0.3	0.3	0	0	130	130	7.34	37	0.04	21	15.77	20	6.34	NaN	NaN	NaN	NaN	NaN	NaN	NaN	NaN	NaN	NaN	NaN	NaN	NaN	NaN	NaN	NaN	NaN	NaN	NaN	NaN	NaN	NaN	NaN
31	77.2	0.3	0.3	0	0	130	130	7.34	37	0.04	21	15.77	20	6.34	NaN	NaN	NaN	NaN	NaN	NaN	NaN	NaN	NaN	NaN	NaN	NaN	NaN	NaN	NaN	NaN	NaN	NaN	NaN	NaN	NaN	NaN	NaN
31.25	77.5	0.3	0.3	0	0	130	130	7.35	37	0.04	21	15.77	20	6.34	NaN	NaN	NaN	NaN	NaN	NaN	NaN	NaN	NaN	NaN	NaN	NaN	NaN	NaN	NaN	NaN	NaN	NaN	NaN	NaN	NaN	NaN	NaN
31.5	77.5	0.3	0.3	0	0	130	130	7.35	37	0.04	21	15.77	20	6.34	NaN	NaN	NaN	NaN	NaN	NaN	NaN	NaN	NaN	NaN	NaN	NaN	NaN	NaN	NaN	NaN	NaN	NaN	NaN	NaN	NaN	NaN	NaN
31.75	77.6	0.3	0.3	0	0	130	130	7.35	37	0.04	21	15.77	20	6.34	NaN	NaN	NaN	NaN	NaN	NaN	NaN	NaN	NaN	NaN	NaN	NaN	NaN	NaN	NaN	NaN	NaN	NaN	NaN	NaN	NaN	NaN	NaN
32	76.1	0.3	0.3	0	0	130	130	7.35	37	0.04	21	15.77	20	6.34	NaN	NaN	NaN	NaN	NaN	NaN	NaN	NaN	NaN	NaN	NaN	NaN	NaN	NaN	NaN	NaN	NaN	NaN	NaN	NaN	NaN	NaN	NaN
32.25	74.4	0.3	0.3	0	0	130	130	7.34	37	0.04	21	15.77	20	6.34	NaN	NaN	NaN	NaN	NaN	NaN	NaN	NaN	NaN	NaN	NaN	NaN	NaN	NaN	NaN	NaN	NaN	NaN	NaN	NaN	NaN	NaN	NaN
32.5	71.1	0.3	0.3	0	0	130	130	7.34	37	0.04	21	15.77	20	6.34	NaN	NaN	NaN	NaN	NaN	NaN	NaN	NaN	NaN	NaN	NaN	NaN	NaN	NaN	NaN	NaN	NaN	NaN	NaN	NaN	NaN	NaN	NaN
32.75	70.3	0.3	0.3	0	0	130	130	7.34	37	0.04	21	15.77	20	6.34	NaN	NaN	NaN	NaN	NaN	NaN	NaN	NaN	NaN	NaN	NaN	NaN	NaN	NaN	NaN	NaN	NaN	NaN	NaN	NaN	NaN	NaN	NaN
33	69.3	0.3	0.3	0	0	130	130	7.34	37	0.04	21	15.77	20	6.34	NaN	NaN	NaN	NaN	NaN	NaN	NaN	NaN	NaN	NaN	NaN	NaN	NaN	NaN	NaN	NaN	NaN	NaN	NaN	NaN	NaN	NaN	NaN
33.25	68.5	0.3	0.3	0	0	130	130	7.33	37	0.04	21	15.77	20	6.34	NaN	NaN	NaN	NaN	NaN	NaN	NaN	NaN	NaN	NaN	NaN	NaN	NaN	NaN	NaN	NaN	NaN	NaN	NaN	NaN	NaN	NaN	NaN
33.5	67.7	0.3	0.3	0	0	130	130	7.33	37	0.04	21	15.77	20	6.34	NaN	NaN	NaN	NaN	NaN	NaN	NaN	NaN	NaN	NaN	NaN	NaN	NaN	NaN	NaN	NaN	NaN	NaN	NaN	NaN	NaN	NaN	NaN
33.75	66.9	0.3	0.3	0	0	130	130	7.33	37	0.04	21	15.77	20	6.34	NaN	NaN	NaN	NaN	NaN	NaN	NaN	NaN	NaN	NaN	NaN	NaN	NaN	NaN	NaN	NaN	NaN	NaN	NaN	NaN	NaN	NaN	NaN
34	65.2	0.3	0.3	0	0	130	130	7.33	37	0.04	21	15.77	20	6.34	NaN	NaN	NaN	NaN	NaN	NaN	NaN	NaN	NaN	NaN	NaN	NaN	NaN	NaN	NaN	NaN	NaN	NaN	NaN	NaN	NaN	NaN	NaN
34.25	65.8	0.3	0.3	0	0	130	130	7.32	37	0.04	21	15.77	20	6.34	NaN	NaN	NaN	NaN	NaN	NaN	NaN	NaN	NaN	NaN	NaN	NaN	NaN	NaN	NaN	NaN	NaN	NaN	NaN	NaN	NaN	NaN	NaN
34.5	68.6	0.3	0.3	0	0	130	130	7.33	37	0.04	21	15.77	20	6.34	NaN	NaN	NaN	NaN	NaN	NaN	NaN	NaN	NaN	NaN	NaN	NaN	NaN	NaN	NaN	NaN	NaN	NaN	NaN	NaN	NaN	NaN	NaN
34.75	70.4	0.3	0.3	0	0	130	130	7.32	37	0.04	21	15.77	20	6.34	NaN	NaN	NaN	NaN	NaN	NaN	NaN	NaN	NaN	NaN	NaN	NaN	NaN	NaN	NaN	NaN	NaN	NaN	NaN	NaN	NaN	NaN	NaN
35	71.7	0.3	0.3	0	0	130	130	7.32	37	0.04	21	15.77	20	6.34	NaN	NaN	NaN	NaN	NaN	NaN	NaN	NaN	NaN	NaN	NaN	NaN	NaN	NaN	NaN	NaN	NaN	NaN	NaN	NaN	NaN	NaN	NaN
35.25	72.8	0.3	0.3	0	0	130	130	7.32	37	0.04	21	15.77	20	6.34	NaN	NaN	NaN	NaN	NaN	NaN	NaN	NaN	NaN	NaN	NaN	NaN	NaN	NaN	NaN	NaN	NaN	NaN	NaN	NaN	NaN	NaN	NaN
35.5	73	0.3	0.3	0	0	130	130	7.32	37	0.04	21	15.77	20	6.34	NaN	NaN	NaN	NaN	NaN	NaN	NaN	NaN	NaN	NaN	NaN	NaN	NaN	NaN	NaN	NaN	NaN	NaN	NaN	NaN	NaN	NaN	NaN
35.75	73.8	0.3	0.3	0	0	130	130	7.32	37	0.04	21	15.77	20	6.34	NaN	NaN	NaN	NaN	NaN	NaN	NaN	NaN	NaN	NaN	NaN	NaN	NaN	NaN	NaN	NaN	NaN	NaN	NaN	NaN	NaN	NaN	NaN
36	74	0.3	0.3	0	0	130	130	7.32	37	0.04	21	15.77	20	6.34	NaN	NaN	NaN	NaN	NaN	NaN	NaN	NaN	NaN	NaN	NaN	NaN	NaN	NaN	NaN	NaN	NaN	NaN	NaN	NaN	NaN	NaN	NaN
36.25	73.9	0.3	0.3	0	0	130	130	7.31	37	0.04	21	15.77	20	6.34	NaN	NaN	NaN	NaN	NaN	NaN	NaN	NaN	NaN	NaN	NaN	NaN	NaN	NaN	NaN	NaN	NaN	NaN	NaN	NaN	NaN	NaN	NaN
36.5	73	0.3	0.3	0	0	130	130	7.31	37	0.04	21	15.77	20	6.34	NaN	NaN	NaN	NaN	NaN	NaN	NaN	NaN	NaN	NaN	NaN	NaN	NaN	NaN	NaN	NaN	NaN	NaN	NaN	NaN	NaN	NaN	NaN
36.75	72.7	0.3	0.3	0	0	130	130	7.31	37	0.04	21	15.77	20	6.34	NaN	NaN	NaN	NaN	NaN	NaN	NaN	NaN	NaN	NaN	NaN	NaN	NaN	NaN	NaN	NaN	NaN	NaN	NaN	NaN	NaN	NaN	NaN
37	73.1	0.3	0.3	0	0	130	130	7.3	37	0.04	21	15.77	20	6.34	NaN	NaN	NaN	NaN	NaN	NaN	NaN	NaN	NaN	NaN	NaN	NaN	NaN	NaN	NaN	NaN	NaN	NaN	NaN	NaN	NaN	NaN	NaN
37.25	72.1	0.3	0.3	0	0	130	130	7.3	37	0.04	21	15.77	20	6.34	NaN	NaN	NaN	NaN	NaN	NaN	NaN	NaN	NaN	NaN	NaN	NaN	NaN	NaN	NaN	NaN	NaN	NaN	NaN	NaN	NaN	NaN	NaN
37.5	69.3	0.3	0.3	0	0	130	130	7.29	37	0.04	21	15.77	20	6.34	NaN	NaN	NaN	NaN	NaN	NaN	NaN	NaN	NaN	NaN	NaN	NaN	NaN	NaN	NaN	NaN	NaN	NaN	NaN	NaN	NaN	NaN	NaN
37.75	70.2	0.3	0.3	0	0	130	130	7.29	37	0.04	21	15.77	20	6.34	NaN	NaN	NaN	NaN	NaN	NaN	NaN	NaN	NaN	NaN	NaN	NaN	NaN	NaN	NaN	NaN	NaN	NaN	NaN	NaN	NaN	NaN	NaN
38	66.1	0.3	0.3	0	0	130	130	7.28	37	0.04	21	15.77	20	6.34	NaN	NaN	NaN	NaN	NaN	NaN	NaN	NaN	NaN	NaN	NaN	NaN	NaN	NaN	NaN	NaN	NaN	NaN	NaN	NaN	NaN	NaN	NaN
38.25	65	0.3	0.3	0	0	130	130	7.28	37	0.04	21	15.77	20	6.34	NaN	NaN	NaN	NaN	NaN	NaN	NaN	NaN	NaN	NaN	NaN	NaN	NaN	NaN	NaN	NaN	NaN	NaN	NaN	NaN	NaN	NaN	NaN
38.5	64.6	0.3	0.3	0	0	130	130	7.27	37	0.04	21	15.77	20	6.34	NaN	NaN	NaN	NaN	NaN	NaN	NaN	NaN	NaN	NaN	NaN	NaN	NaN	NaN	NaN	NaN	NaN	NaN	NaN	NaN	NaN	NaN	NaN
38.75	64	0.3	0.3	0	0	130	130	7.27	37	0.04	21	15.77	20	6.34	NaN	NaN	NaN	NaN	NaN	NaN	NaN	NaN	NaN	NaN	NaN	NaN	NaN	NaN	NaN	NaN	NaN	NaN	NaN	NaN	NaN	NaN	NaN
39	66.5	0.3	0.3	0	0	130	130	7.27	37	0.04	21	15.77	20	6.34	NaN	NaN	NaN	NaN	NaN	NaN	NaN	NaN	NaN	NaN	NaN	NaN	NaN	NaN	NaN	NaN	NaN	NaN	NaN	NaN	NaN	NaN	NaN
39.25	68.6	0.3	0.3	0	0	130	130	7.27	37	0.04	21	15.77	20	6.34	NaN	NaN	NaN	NaN	NaN	NaN	NaN	NaN	NaN	NaN	NaN	NaN	NaN	NaN	NaN	NaN	NaN	NaN	NaN	NaN	NaN	NaN	NaN
39.5	67.7	0.3	0.3	0	0	130	130	7.26	37	0.04	21	15.77	20	6.34	NaN	NaN	NaN	NaN	NaN	NaN	NaN	NaN	NaN	NaN	NaN	NaN	NaN	NaN	NaN	NaN	NaN	NaN	NaN	NaN	NaN	NaN	NaN
39.75	68.1	0.3	0.3	0	0	130	130	7.26	37	0.04	21	15.77	20	6.34	NaN	NaN	NaN	NaN	NaN	NaN	NaN	NaN	NaN	NaN	NaN	NaN	NaN	NaN	NaN	NaN	NaN	NaN	NaN	NaN	NaN	NaN	NaN
40	69.5	0.3	0.3	0	0	130	130	7.25	37	0.04	21	15.77	20	6.34	NaN	NaN	NaN	NaN	NaN	NaN	NaN	NaN	NaN	NaN	NaN	NaN	NaN	NaN	NaN	NaN	NaN	NaN	NaN	NaN	NaN	NaN	NaN
40.25	70.2	0.3	0.3	0	0	130	130	7.25	37	0.04	21	15.77	20	6.34	NaN	NaN	NaN	NaN	NaN	NaN	NaN	NaN	NaN	NaN	NaN	NaN	NaN	NaN	NaN	NaN	NaN	NaN	NaN	NaN	NaN	NaN	NaN
40.5	70.6	0.3	0.3	0	0	130	130	7.25	37	0.04	21	15.77	20	6.34	NaN	NaN	NaN	NaN	NaN	NaN	NaN	NaN	NaN	NaN	NaN	NaN	NaN	NaN	NaN	NaN	NaN	NaN	NaN	NaN	NaN	NaN	NaN
40.75	71.3	0.3	0.3	0	0	130	130	7.24	37	0.04	21	15.77	20	6.34	NaN	NaN	NaN	NaN	NaN	NaN	NaN	NaN	NaN	NaN	NaN	NaN	NaN	NaN	NaN	NaN	NaN	NaN	NaN	NaN	NaN	NaN	NaN
41	71.7	0.3	0.3	0	0	130	130	7.24	37	0.04	21	15.77	20	6.34	NaN	NaN	NaN	NaN	NaN	NaN	NaN	NaN	NaN	NaN	NaN	NaN	NaN	NaN	NaN	NaN	NaN	NaN	NaN	NaN	NaN	NaN	NaN
41.25	71.5	0.3	0.3	0	0	130	130	7.24	37	0.04	21	15.77	20	6.34	NaN	NaN	NaN	NaN	NaN	NaN	NaN	NaN	NaN	NaN	NaN	NaN	NaN	NaN	NaN	NaN	NaN	NaN	NaN	NaN	NaN	NaN	NaN
41.5	71.1	0.3	0.3	0	0	130	130	7.23	37	0.04	21	15.77	20	6.34	NaN	NaN	NaN	NaN	NaN	NaN	NaN	NaN	NaN	NaN	NaN	NaN	NaN	NaN	NaN	NaN	NaN	NaN	NaN	NaN	NaN	NaN	NaN
41.75	71.2	0.3	0.3	0	0	130	130	7.23	37	0.04	21	15.77	20	6.34	NaN	NaN	NaN	NaN	NaN	NaN	NaN	NaN	NaN	NaN	NaN	NaN	NaN	NaN	NaN	NaN	NaN	NaN	NaN	NaN	NaN	NaN	NaN
42	70.1	0.3	0.3	0	0	130	130	7.22	37	0.04	21	15.77	20	6.34	NaN	NaN	NaN	NaN	NaN	NaN	NaN	NaN	NaN	NaN	NaN	NaN	NaN	NaN	NaN	NaN	NaN	NaN	NaN	NaN	NaN	NaN	NaN
42.25	69	0.3	0.3	0	0	130	130	7.22	37	0.04	21	15.77	20	6.34	NaN	NaN	NaN	NaN	NaN	NaN	NaN	NaN	NaN	NaN	NaN	NaN	NaN	NaN	NaN	NaN	NaN	NaN	NaN	NaN	NaN	NaN	NaN
42.5	69.4	0.3	0.3	0	0	130	130	7.21	37	0.04	21	15.77	20	6.34	NaN	NaN	NaN	NaN	NaN	NaN	NaN	NaN	NaN	NaN	NaN	NaN	NaN	NaN	NaN	NaN	NaN	NaN	NaN	NaN	NaN	NaN	NaN
42.75	69.3	0.3	0.3	0	0	130	130	7.21	37	0.04	21	15.77	20	6.34	NaN	NaN	NaN	NaN	NaN	NaN	NaN	NaN	NaN	NaN	NaN	NaN	NaN	NaN	NaN	NaN	NaN	NaN	NaN	NaN	NaN	NaN	NaN
43	69.3	0.3	0.3	0	0	130	130	7.2	37	0.04	21	15.77	20	6.34	NaN	NaN	NaN	NaN	NaN	NaN	NaN	NaN	NaN	NaN	NaN	NaN	NaN	NaN	NaN	NaN	NaN	NaN	NaN	NaN	NaN	NaN	NaN
43.25	68.3	0.3	0.3	0	0	130	130	7.2	37	0.04	21	15.77	20	6.34	NaN	NaN	NaN	NaN	NaN	NaN	NaN	NaN	NaN	NaN	NaN	NaN	NaN	NaN	NaN	NaN	NaN	NaN	NaN	NaN	NaN	NaN	NaN
43.5	67.7	0.3	0.3	0	0	130	130	7.23	37	0.04	21	15.77	20	6.34	NaN	NaN	NaN	NaN	NaN	NaN	NaN	NaN	NaN	NaN	NaN	NaN	NaN	NaN	NaN	NaN	NaN	NaN	NaN	NaN	NaN	NaN	NaN
43.75	67.9	0.3	0.3	0	0	130	130	7.24	37	0.04	21	15.77	20	6.34	NaN	NaN	NaN	NaN	NaN	NaN	NaN	NaN	NaN	NaN	NaN	NaN	NaN	NaN	NaN	NaN	NaN	NaN	NaN	NaN	NaN	NaN	NaN
44	68.5	0.3	0.3	0	0	130	130	7.24	37	0.04	21	15.77	20	6.34	680	1.52	1.0336	NaN	NaN	NaN	0.82	0.0356522	NaN	733750	1.11755e-06	1.33195	231	1.66	18.592	0.770952	57.1054	0.0121451	NaN	NaN	NaN	NaN	NaN
44.25	67.4	0.3	0.3	0	0	130	130	7.24	37	0.04	21	15.77	20	6.34	NaN	NaN	NaN	NaN	NaN	NaN	NaN	NaN	NaN	NaN	NaN	NaN	NaN	NaN	NaN	NaN	NaN	NaN	NaN	NaN	NaN	NaN	NaN
44.5	66.2	0.3	0.3	0	0	130	130	7.24	37	0.04	21	15.77	20	6.34	NaN	NaN	NaN	NaN	NaN	NaN	NaN	NaN	NaN	NaN	NaN	NaN	NaN	NaN	NaN	NaN	NaN	NaN	NaN	NaN	NaN	NaN	NaN
44.75	67.6	0.3	0.3	0	0	130	130	7.24	37	0.04	21	15.77	20	6.34	NaN	NaN	NaN	NaN	NaN	NaN	NaN	NaN	NaN	NaN	NaN	NaN	NaN	NaN	NaN	NaN	NaN	NaN	NaN	NaN	NaN	NaN	NaN
45	65.8	0.3	0.3	0	0	130	130	7.24	37	0.04	21	15.77	20	6.34	NaN	NaN	NaN	1.386	2	3.02624	NaN	NaN	NaN	NaN	NaN	NaN	NaN	NaN	NaN	NaN	NaN	NaN	NaN	NaN	NaN	NaN	NaN
45.25	65.9	0.3	0.3	0	0	130	130	7.25	37	0.04	21	15.77	20	6.34	NaN	NaN	NaN	NaN	NaN	NaN	NaN	NaN	NaN	NaN	NaN	NaN	NaN	NaN	NaN	NaN	NaN	NaN	NaN	NaN	NaN	NaN	NaN
45.5	67	0.3	0.3	0	0	130	130	7.25	37	0.04	21	15.77	20	6.34	NaN	NaN	NaN	NaN	NaN	NaN	NaN	NaN	NaN	NaN	NaN	NaN	NaN	NaN	NaN	NaN	NaN	NaN	NaN	NaN	NaN	NaN	NaN
45.75	68.4	0.3	0.3	0	0	130	130	7.24	37	0.04	21	15.77	20	6.34	NaN	NaN	NaN	NaN	NaN	NaN	NaN	NaN	NaN	NaN	NaN	NaN	NaN	NaN	NaN	NaN	NaN	NaN	NaN	NaN	NaN	NaN	NaN
46	67.9	0.3	0.3	0	0	130	130	7.24	37	0.04	21	15.77	20	6.34	NaN	NaN	NaN	NaN	NaN	NaN	NaN	NaN	NaN	NaN	NaN	NaN	NaN	NaN	NaN	NaN	NaN	NaN	NaN	NaN	NaN	NaN	NaN
46.25	68	0.3	0.3	0	0	130	130	7.24	37	0.04	21	15.77	20	6.34	NaN	NaN	NaN	NaN	NaN	NaN	NaN	NaN	NaN	NaN	NaN	NaN	NaN	NaN	NaN	NaN	NaN	NaN	NaN	NaN	NaN	NaN	NaN
46.5	66.8	0.3	0.3	0	0	130	130	7.24	37	0.04	21	15.77	20	6.34	NaN	NaN	NaN	NaN	NaN	NaN	NaN	NaN	NaN	NaN	NaN	NaN	NaN	NaN	NaN	NaN	NaN	NaN	NaN	NaN	NaN	NaN	NaN
46.75	67	0.3	0.3	0	0	130	130	7.24	37	0.04	21	15.77	20	6.34	NaN	NaN	NaN	NaN	NaN	NaN	NaN	NaN	NaN	NaN	NaN	NaN	NaN	NaN	NaN	NaN	NaN	NaN	NaN	NaN	NaN	NaN	NaN
47	67.6	0.3	0.3	0	0	130	130	7.25	37	0.04	21	15.77	20	6.34	NaN	NaN	NaN	NaN	NaN	NaN	NaN	NaN	NaN	NaN	NaN	NaN	NaN	NaN	NaN	NaN	NaN	NaN	NaN	NaN	NaN	NaN	NaN
47.25	68.1	0.3	0.3	0	0	130	130	7.25	37	0.04	21	15.77	20	6.34	NaN	NaN	NaN	NaN	NaN	NaN	NaN	NaN	NaN	NaN	NaN	NaN	NaN	NaN	NaN	NaN	NaN	NaN	NaN	NaN	NaN	NaN	NaN
47.5	67.7	0.3	0.3	0	0	130	130	7.24	37	0.04	21	15.77	20	6.34	NaN	NaN	NaN	NaN	NaN	NaN	NaN	NaN	NaN	NaN	NaN	NaN	NaN	NaN	NaN	NaN	NaN	NaN	NaN	NaN	NaN	NaN	NaN
47.75	67.4	0.3	0.3	0	0	130	130	7.24	37	0.04	21	15.77	20	6.34	NaN	NaN	NaN	NaN	NaN	NaN	NaN	NaN	NaN	NaN	NaN	NaN	NaN	NaN	NaN	NaN	NaN	NaN	NaN	NaN	NaN	NaN	NaN
48	62.8	0.3	0.3	0	0	130	130	7.24	37	0.04	21	15.77	20	6.34	NaN	NaN	NaN	NaN	NaN	NaN	NaN	NaN	NaN	NaN	NaN	NaN	NaN	NaN	NaN	NaN	NaN	NaN	NaN	NaN	NaN	NaN	NaN
48.25	60.7	0.3	0.3	0	0	130	130	7.24	37	0.04	21	15.77	20	6.34	NaN	NaN	NaN	NaN	NaN	NaN	NaN	NaN	NaN	NaN	NaN	NaN	NaN	NaN	NaN	NaN	NaN	NaN	NaN	NaN	NaN	NaN	NaN
48.5	62.8	0.3	0.3	0	0	130	130	7.25	37	0.04	21	15.77	20	6.34	NaN	NaN	NaN	NaN	NaN	NaN	NaN	NaN	NaN	NaN	NaN	NaN	NaN	NaN	NaN	NaN	NaN	NaN	NaN	NaN	NaN	NaN	NaN
48.75	65.2	0.3	0.3	0	0	130	130	7.25	37	0.04	21	15.77	20	6.34	NaN	NaN	NaN	NaN	NaN	NaN	NaN	NaN	NaN	NaN	NaN	NaN	NaN	NaN	NaN	NaN	NaN	NaN	NaN	NaN	NaN	NaN	NaN
49	66.3	0.3	0.3	0	0	130	130	7.24	37	0.04	21	15.77	20	6.34	NaN	NaN	NaN	NaN	NaN	NaN	NaN	NaN	NaN	NaN	NaN	NaN	NaN	NaN	NaN	NaN	NaN	NaN	NaN	NaN	NaN	NaN	NaN
49.25	65.1	0.3	0.3	0	0	130	130	7.24	37.1	0.04	21	15.77	20	6.34	NaN	NaN	NaN	NaN	NaN	NaN	NaN	NaN	NaN	NaN	NaN	NaN	NaN	NaN	NaN	NaN	NaN	NaN	NaN	NaN	NaN	NaN	NaN
49.5	63.2	0.3	0.3	0	0	130	130	7.24	37.1	0.03	21	15.77	20	6.34	NaN	NaN	NaN	NaN	NaN	NaN	NaN	NaN	NaN	NaN	NaN	NaN	NaN	NaN	NaN	NaN	NaN	NaN	NaN	NaN	NaN	NaN	NaN
49.75	63	0	0	0	0	70	130	7.26	36.4	0	0	15.77	20	6.34	NaN	NaN	NaN	NaN	NaN	NaN	NaN	NaN	NaN	NaN	NaN	NaN	NaN	NaN	NaN	NaN	NaN	NaN	NaN	NaN	NaN	NaN	NaN
50	93.2	0.3	0.29	0	0	130	130	7.37	36.2	0.56	21	15.77	20	6.34	NaN	NaN	NaN	NaN	NaN	NaN	NaN	NaN	NaN	NaN	NaN	NaN	NaN	NaN	NaN	NaN	NaN	NaN	NaN	NaN	NaN	NaN	NaN
50.25	86.7	0.3	0.29	0	0	130	130	7.38	38	1.07	21	15.77	20	6.34	NaN	NaN	NaN	NaN	NaN	NaN	NaN	NaN	NaN	NaN	NaN	NaN	NaN	NaN	NaN	NaN	NaN	NaN	NaN	NaN	NaN	NaN	NaN
50.5	81.3	0.3	0.29	0.01	0	130	130	7.41	37	1.89	21	15.77	20	6.34	NaN	NaN	NaN	NaN	NaN	NaN	NaN	NaN	NaN	NaN	NaN	NaN	NaN	NaN	NaN	NaN	NaN	NaN	NaN	NaN	NaN	NaN	NaN
50.75	78	0.3	0.29	0.01	0	130	130	7.39	37	1.87	21	15.77	20	6.34	NaN	NaN	NaN	NaN	NaN	NaN	NaN	NaN	NaN	NaN	NaN	NaN	NaN	NaN	NaN	NaN	NaN	NaN	NaN	NaN	NaN	NaN	NaN
51	74.7	0.3	0.29	0.01	0	130	130	7.39	37.2	1.93	21	15.77	20	6.34	NaN	NaN	NaN	NaN	NaN	NaN	NaN	NaN	NaN	NaN	NaN	NaN	NaN	NaN	NaN	NaN	NaN	NaN	NaN	NaN	NaN	NaN	NaN
51.25	73.2	0.3	0.29	0.01	0	130	130	7.38	37.1	2.13	21	15.77	20	6.34	NaN	NaN	NaN	NaN	NaN	NaN	NaN	NaN	NaN	NaN	NaN	NaN	NaN	NaN	NaN	NaN	NaN	NaN	NaN	NaN	NaN	NaN	NaN
51.5	70.6	0.3	0.29	0.01	0	130	130	7.36	37.1	1.74	21	15.77	20	6.34	NaN	NaN	NaN	NaN	NaN	NaN	NaN	NaN	NaN	NaN	NaN	NaN	NaN	NaN	NaN	NaN	NaN	NaN	NaN	NaN	NaN	NaN	NaN
51.75	70.3	0.3	0.3	0	0	130	130	7.35	37.1	0.05	21	15.77	20	6.34	NaN	NaN	NaN	NaN	NaN	NaN	NaN	NaN	NaN	NaN	NaN	NaN	NaN	NaN	NaN	NaN	NaN	NaN	NaN	NaN	NaN	NaN	NaN
52	68.4	0.3	0.3	0	0	130	130	7.35	37.1	0.04	21	15.77	20	6.34	NaN	NaN	NaN	NaN	NaN	NaN	NaN	NaN	NaN	NaN	NaN	NaN	NaN	NaN	NaN	NaN	NaN	NaN	NaN	NaN	NaN	NaN	NaN
52.25	66.3	0.3	0.3	0	0	130	130	7.35	37.1	0.04	21	15.77	20	6.34	NaN	NaN	NaN	NaN	NaN	NaN	NaN	NaN	NaN	NaN	NaN	NaN	NaN	NaN	NaN	NaN	NaN	NaN	NaN	NaN	NaN	NaN	NaN
52.5	64.1	0.3	0.3	0	0	130	130	7.34	37.1	0.04	21	15.77	20	6.34	NaN	NaN	NaN	NaN	NaN	NaN	NaN	NaN	NaN	NaN	NaN	NaN	NaN	NaN	NaN	NaN	NaN	NaN	NaN	NaN	NaN	NaN	NaN
52.75	63.6	0.3	0.3	0	0	130	130	7.35	37.1	0.04	21	15.77	20	6.34	NaN	NaN	NaN	NaN	NaN	NaN	NaN	NaN	NaN	NaN	NaN	NaN	NaN	NaN	NaN	NaN	NaN	NaN	NaN	NaN	NaN	NaN	NaN
53	61.8	0.3	0.3	0	0	130	130	7.35	37.1	0.04	21	15.77	20	6.34	NaN	NaN	NaN	NaN	NaN	NaN	NaN	NaN	NaN	NaN	NaN	NaN	NaN	NaN	NaN	NaN	NaN	NaN	NaN	NaN	NaN	NaN	NaN
53.25	62.9	0.3	0.3	0	0	130	130	7.35	37.1	0.1	21	15.77	20	6.34	NaN	NaN	NaN	NaN	NaN	NaN	NaN	NaN	NaN	NaN	NaN	NaN	NaN	NaN	NaN	NaN	NaN	NaN	NaN	NaN	NaN	NaN	NaN
53.5	62.9	0.3	0.3	0	0	130	130	7.36	37.1	0.18	21	15.77	20	6.34	NaN	NaN	NaN	NaN	NaN	NaN	NaN	NaN	NaN	NaN	NaN	NaN	NaN	NaN	NaN	NaN	NaN	NaN	NaN	NaN	NaN	NaN	NaN
53.75	63	0.3	0.3	0	0	130	130	7.36	37.1	0.27	21	15.77	20	6.34	NaN	NaN	NaN	NaN	NaN	NaN	NaN	NaN	NaN	NaN	NaN	NaN	NaN	NaN	NaN	NaN	NaN	NaN	NaN	NaN	NaN	NaN	NaN
54	62.7	0.3	0.3	0	0	130	130	7.36	37.1	0.44	21	15.77	20	6.34	NaN	NaN	NaN	NaN	NaN	NaN	NaN	NaN	NaN	NaN	NaN	NaN	NaN	NaN	NaN	NaN	NaN	NaN	NaN	NaN	NaN	NaN	NaN
54.25	63.2	0.3	0.29	0	0	130	130	7.36	37	0.58	21	15.77	20	6.34	NaN	NaN	NaN	NaN	NaN	NaN	NaN	NaN	NaN	NaN	NaN	NaN	NaN	NaN	NaN	NaN	NaN	NaN	NaN	NaN	NaN	NaN	NaN
54.5	62.9	0.3	0.3	0	0	130	130	7.37	37	0.68	21	15.77	20	6.34	NaN	NaN	NaN	NaN	NaN	NaN	NaN	NaN	NaN	NaN	NaN	NaN	NaN	NaN	NaN	NaN	NaN	NaN	NaN	NaN	NaN	NaN	NaN
54.75	62.7	0.3	0.29	0	0	130	130	7.37	37	0.8	21	15.77	20	6.34	NaN	NaN	NaN	NaN	NaN	NaN	NaN	NaN	NaN	NaN	NaN	NaN	NaN	NaN	NaN	NaN	NaN	NaN	NaN	NaN	NaN	NaN	NaN
55	57.6	0.3	0.3	0	0	130	130	7.36	37	0.79	21	15.77	20	6.34	NaN	NaN	NaN	NaN	NaN	NaN	NaN	NaN	NaN	NaN	NaN	NaN	NaN	NaN	NaN	NaN	NaN	NaN	NaN	NaN	NaN	NaN	NaN
55.25	56	0.3	0.29	0	0	130	130	7.36	37	0.88	21	15.77	20	6.34	NaN	NaN	NaN	NaN	NaN	NaN	NaN	NaN	NaN	NaN	NaN	NaN	NaN	NaN	NaN	NaN	NaN	NaN	NaN	NaN	NaN	NaN	NaN
55.5	57.7	0.3	0.29	0	0	130	130	7.37	37	1.05	21	15.77	20	6.34	NaN	NaN	NaN	NaN	NaN	NaN	NaN	NaN	NaN	NaN	NaN	NaN	NaN	NaN	NaN	NaN	NaN	NaN	NaN	NaN	NaN	NaN	NaN
55.75	59.3	0.3	0.3	0	0	130	130	7.35	37	0.04	21	15.77	20	6.34	NaN	NaN	NaN	NaN	NaN	NaN	NaN	NaN	NaN	NaN	NaN	NaN	NaN	NaN	NaN	NaN	NaN	NaN	NaN	NaN	NaN	NaN	NaN
56	56.3	0.3	0.3	0	0	130	130	7.33	37	0.04	21	15.77	20	6.34	NaN	NaN	NaN	NaN	NaN	NaN	NaN	NaN	NaN	NaN	NaN	NaN	NaN	NaN	NaN	NaN	NaN	NaN	NaN	NaN	NaN	NaN	NaN
56.25	54.8	0.3	0.3	0	0	130	130	7.33	37	0.04	21	15.77	20	6.34	NaN	NaN	NaN	NaN	NaN	NaN	NaN	NaN	NaN	NaN	NaN	NaN	NaN	NaN	NaN	NaN	NaN	NaN	NaN	NaN	NaN	NaN	NaN
56.5	53.1	0.3	0.3	0	0	130	130	7.32	37	0.04	21	15.77	20	6.34	NaN	NaN	NaN	NaN	NaN	NaN	NaN	NaN	NaN	NaN	NaN	NaN	NaN	NaN	NaN	NaN	NaN	NaN	NaN	NaN	NaN	NaN	NaN
56.75	55.1	0.3	0.3	0	0	130	130	7.33	37	0.04	21	15.77	20	6.34	NaN	NaN	NaN	NaN	NaN	NaN	NaN	NaN	NaN	NaN	NaN	NaN	NaN	NaN	NaN	NaN	NaN	NaN	NaN	NaN	NaN	NaN	NaN
57	54.2	0.3	0.3	0	0	130	130	7.32	37	0.04	21	15.77	20	6.34	NaN	NaN	NaN	NaN	NaN	NaN	NaN	NaN	NaN	NaN	NaN	NaN	NaN	NaN	NaN	NaN	NaN	NaN	NaN	NaN	NaN	NaN	NaN
57.25	53.8	0.3	0.3	0	0	130	130	7.32	37	0.04	21	15.77	20	6.34	NaN	NaN	NaN	NaN	NaN	NaN	NaN	NaN	NaN	NaN	NaN	NaN	NaN	NaN	NaN	NaN	NaN	NaN	NaN	NaN	NaN	NaN	NaN
57.5	52.3	0.3	0.3	0	0	130	130	7.32	37	0.04	21	15.77	20	6.34	NaN	NaN	NaN	NaN	NaN	NaN	NaN	NaN	NaN	NaN	NaN	NaN	NaN	NaN	NaN	NaN	NaN	NaN	NaN	NaN	NaN	NaN	NaN
57.75	50.6	0.3	0.3	0	0	130	130	7.32	37	0.04	21	15.77	20	6.34	NaN	NaN	NaN	NaN	NaN	NaN	NaN	NaN	NaN	NaN	NaN	NaN	NaN	NaN	NaN	NaN	NaN	NaN	NaN	NaN	NaN	NaN	NaN
58	49.4	0.31	0.31	0	0	130	130	7.32	37	0.04	21.1	15.77	20	6.34	NaN	NaN	NaN	NaN	NaN	NaN	NaN	NaN	NaN	NaN	NaN	NaN	NaN	NaN	NaN	NaN	NaN	NaN	NaN	NaN	NaN	NaN	NaN
58.25	48.8	0.35	0.35	0	0	130	130	7.32	37	0.04	21.55	15.77	20	6.34	NaN	NaN	NaN	NaN	NaN	NaN	NaN	NaN	NaN	NaN	NaN	NaN	NaN	NaN	NaN	NaN	NaN	NaN	NaN	NaN	NaN	NaN	NaN
58.5	53.5	0.3	0.3	0	0	130	130	7.32	37	0.04	21	15.77	20	6.34	NaN	NaN	NaN	NaN	NaN	NaN	NaN	NaN	NaN	NaN	NaN	NaN	NaN	NaN	NaN	NaN	NaN	NaN	NaN	NaN	NaN	NaN	NaN
58.75	55.1	0.3	0.3	0	0	130	130	7.32	37	0.04	21	15.77	20	6.34	NaN	NaN	NaN	NaN	NaN	NaN	NaN	NaN	NaN	NaN	NaN	NaN	NaN	NaN	NaN	NaN	NaN	NaN	NaN	NaN	NaN	NaN	NaN
59	55.8	0.3	0.3	0	0	130	130	7.32	37	0.04	21	15.77	20	6.34	NaN	NaN	NaN	NaN	NaN	NaN	NaN	NaN	NaN	NaN	NaN	NaN	NaN	NaN	NaN	NaN	NaN	NaN	NaN	NaN	NaN	NaN	NaN
59.25	55.9	0.3	0.3	0	0	130	130	7.32	37	0.04	21	15.77	20	6.34	NaN	NaN	NaN	NaN	NaN	NaN	NaN	NaN	NaN	NaN	NaN	NaN	NaN	NaN	NaN	NaN	NaN	NaN	NaN	NaN	NaN	NaN	NaN
59.5	54.7	0.3	0.3	0	0	130	130	7.31	37	0.04	21	15.77	20	6.34	NaN	NaN	NaN	NaN	NaN	NaN	NaN	NaN	NaN	NaN	NaN	NaN	NaN	NaN	NaN	NaN	NaN	NaN	NaN	NaN	NaN	NaN	NaN
59.75	54.3	0.3	0.3	0	0	130	130	7.31	37	0.04	21	15.77	20	6.34	NaN	NaN	NaN	NaN	NaN	NaN	NaN	NaN	NaN	NaN	NaN	NaN	NaN	NaN	NaN	NaN	NaN	NaN	NaN	NaN	NaN	NaN	NaN
60	52.3	0.3	0.3	0	0	130	130	7.31	37	0.04	21	15.77	20	6.34	NaN	NaN	NaN	NaN	NaN	NaN	NaN	NaN	NaN	NaN	NaN	NaN	NaN	NaN	NaN	NaN	NaN	NaN	NaN	NaN	NaN	NaN	NaN
60.25	50.2	0.3	0.3	0	0	130	130	7.3	37	0.04	21	15.77	20	6.34	NaN	NaN	NaN	NaN	NaN	NaN	NaN	NaN	NaN	NaN	NaN	NaN	NaN	NaN	NaN	NaN	NaN	NaN	NaN	NaN	NaN	NaN	NaN
60.5	51.9	0.3	0.3	0	0	130	130	7.3	37	0.04	21	15.77	20	6.34	NaN	NaN	NaN	NaN	NaN	NaN	NaN	NaN	NaN	NaN	NaN	NaN	NaN	NaN	NaN	NaN	NaN	NaN	NaN	NaN	NaN	NaN	NaN
60.75	52.8	0.3	0.3	0	0	130	130	7.3	37	0.04	21	15.77	20	6.34	NaN	NaN	NaN	NaN	NaN	NaN	NaN	NaN	NaN	NaN	NaN	NaN	NaN	NaN	NaN	NaN	NaN	NaN	NaN	NaN	NaN	NaN	NaN
61	52.2	0.3	0.3	0	0	130	130	7.29	37	0.04	21	15.77	20	6.34	NaN	NaN	NaN	NaN	NaN	NaN	NaN	NaN	NaN	NaN	NaN	NaN	NaN	NaN	NaN	NaN	NaN	NaN	NaN	NaN	NaN	NaN	NaN
61.25	51.7	0.3	0.3	0	0	130	130	7.29	37	0.04	21	15.77	20	6.34	NaN	NaN	NaN	NaN	NaN	NaN	NaN	NaN	NaN	NaN	NaN	NaN	NaN	NaN	NaN	NaN	NaN	NaN	NaN	NaN	NaN	NaN	NaN
61.5	51.1	0.3	0.3	0	0	130	130	7.29	37	0.04	21	15.77	20	6.34	NaN	NaN	NaN	NaN	NaN	NaN	NaN	NaN	NaN	NaN	NaN	NaN	NaN	NaN	NaN	NaN	NaN	NaN	NaN	NaN	NaN	NaN	NaN
61.75	49.2	0.32	0.32	0	0	130	130	7.28	37	0.04	21.27	15.77	20	6.34	NaN	NaN	NaN	NaN	NaN	NaN	NaN	NaN	NaN	NaN	NaN	NaN	NaN	NaN	NaN	NaN	NaN	NaN	NaN	NaN	NaN	NaN	NaN
62	45.8	0.41	0.4	0	0.01	130	130	7.28	37	0.04	22.2	15.77	20	6.34	NaN	NaN	NaN	NaN	NaN	NaN	NaN	NaN	NaN	NaN	NaN	NaN	NaN	NaN	NaN	NaN	NaN	NaN	NaN	NaN	NaN	NaN	NaN
62.25	49.4	0.49	0.48	0	0.01	130	130	7.28	37	0.04	23.07	15.77	20	6.34	NaN	NaN	NaN	NaN	NaN	NaN	NaN	NaN	NaN	NaN	NaN	NaN	NaN	NaN	NaN	NaN	NaN	NaN	NaN	NaN	NaN	NaN	NaN
62.5	54.1	0.37	0.37	0	0	130	130	7.28	37	0.04	21.73	15.77	20	6.34	NaN	NaN	NaN	NaN	NaN	NaN	NaN	NaN	NaN	NaN	NaN	NaN	NaN	NaN	NaN	NaN	NaN	NaN	NaN	NaN	NaN	NaN	NaN
62.75	53	0.3	0.3	0	0	130	130	7.28	37	0.04	21	15.77	20	6.34	NaN	NaN	NaN	NaN	NaN	NaN	NaN	NaN	NaN	NaN	NaN	NaN	NaN	NaN	NaN	NaN	NaN	NaN	NaN	NaN	NaN	NaN	NaN
63	49.6	0.3	0.3	0	0	130	130	7.27	37	0.04	21.06	15.77	20	6.34	NaN	NaN	NaN	NaN	NaN	NaN	NaN	NaN	NaN	NaN	NaN	NaN	NaN	NaN	NaN	NaN	NaN	NaN	NaN	NaN	NaN	NaN	NaN
63.25	49.4	0.32	0.32	0	0	130	130	7.27	37	0.04	21.28	15.77	20	6.34	NaN	NaN	NaN	NaN	NaN	NaN	NaN	NaN	NaN	NaN	NaN	NaN	NaN	NaN	NaN	NaN	NaN	NaN	NaN	NaN	NaN	NaN	NaN
63.5	50.8	0.31	0.31	0	0	130	130	7.27	37	0.04	21.11	15.77	20	6.34	NaN	NaN	NaN	NaN	NaN	NaN	NaN	NaN	NaN	NaN	NaN	NaN	NaN	NaN	NaN	NaN	NaN	NaN	NaN	NaN	NaN	NaN	NaN
63.75	49.6	0.31	0.31	0	0	130	130	7.26	37	0.04	21.2	15.77	20	6.34	NaN	NaN	NaN	NaN	NaN	NaN	NaN	NaN	NaN	NaN	NaN	NaN	NaN	NaN	NaN	NaN	NaN	NaN	NaN	NaN	NaN	NaN	NaN
64	50	0.3	0.3	0	0	130	130	7.26	37	0.04	21.09	15.77	20	6.34	NaN	NaN	NaN	NaN	NaN	NaN	NaN	NaN	NaN	NaN	NaN	NaN	NaN	NaN	NaN	NaN	NaN	NaN	NaN	NaN	NaN	NaN	NaN
64.25	50.9	0.3	0.3	0	0	130	130	7.26	37	0.04	21	15.77	20	6.34	NaN	NaN	NaN	NaN	NaN	NaN	NaN	NaN	NaN	NaN	NaN	NaN	NaN	NaN	NaN	NaN	NaN	NaN	NaN	NaN	NaN	NaN	NaN
64.5	50.6	0.3	0.3	0	0	130	130	7.25	37	0.04	21	15.77	20	6.34	NaN	NaN	NaN	NaN	NaN	NaN	NaN	NaN	NaN	NaN	NaN	NaN	NaN	NaN	NaN	NaN	NaN	NaN	NaN	NaN	NaN	NaN	NaN
64.75	49.2	0.31	0.31	0	0	130	130	7.25	37	0.04	21.15	15.77	20	6.34	NaN	NaN	NaN	NaN	NaN	NaN	NaN	NaN	NaN	NaN	NaN	NaN	NaN	NaN	NaN	NaN	NaN	NaN	NaN	NaN	NaN	NaN	NaN
65	49.6	0.33	0.33	0	0	130	130	7.24	37	0.04	21.35	15.77	20	6.34	NaN	NaN	NaN	NaN	NaN	NaN	NaN	NaN	NaN	NaN	NaN	NaN	NaN	NaN	NaN	NaN	NaN	NaN	NaN	NaN	NaN	NaN	NaN
65.25	49.8	0.33	0.33	0	0	130	130	7.24	37	0.04	21.37	15.77	20	6.34	NaN	NaN	NaN	NaN	NaN	NaN	NaN	NaN	NaN	NaN	NaN	NaN	NaN	NaN	NaN	NaN	NaN	NaN	NaN	NaN	NaN	NaN	NaN
65.5	49.9	0.36	0.36	0	0	130	130	7.24	37	0.04	21.76	15.77	20	6.34	NaN	NaN	NaN	NaN	NaN	NaN	NaN	NaN	NaN	NaN	NaN	NaN	NaN	NaN	NaN	NaN	NaN	NaN	NaN	NaN	NaN	NaN	NaN
65.75	51.8	0.3	0.3	0	0	130	130	7.25	37	0.04	21	15.77	20	6.34	NaN	NaN	NaN	NaN	NaN	NaN	NaN	NaN	NaN	NaN	NaN	NaN	NaN	NaN	NaN	NaN	NaN	NaN	NaN	NaN	NaN	NaN	NaN
66	49	0.31	0.31	0	0	130	130	7.24	37	0.04	21.17	15.77	20	6.34	NaN	NaN	NaN	NaN	NaN	NaN	NaN	NaN	NaN	NaN	NaN	NaN	NaN	NaN	NaN	NaN	NaN	NaN	NaN	NaN	NaN	NaN	NaN
66.25	47.8	0.4	0.4	0	0.01	130	130	7.24	37	0.04	22.13	15.77	20	6.34	NaN	NaN	NaN	NaN	NaN	NaN	NaN	NaN	NaN	NaN	NaN	NaN	NaN	NaN	NaN	NaN	NaN	NaN	NaN	NaN	NaN	NaN	NaN
66.5	51.7	0.37	0.37	0	0	130	130	7.25	37	0.04	21.74	15.77	20	6.34	NaN	NaN	NaN	NaN	NaN	NaN	NaN	NaN	NaN	NaN	NaN	NaN	NaN	NaN	NaN	NaN	NaN	NaN	NaN	NaN	NaN	NaN	NaN
66.75	51.7	0.31	0.31	0	0	130	130	7.24	37	0.04	21.18	15.77	20	6.34	NaN	NaN	NaN	NaN	NaN	NaN	NaN	NaN	NaN	NaN	NaN	NaN	NaN	NaN	NaN	NaN	NaN	NaN	NaN	NaN	NaN	NaN	NaN
67	49.8	0.3	0.3	0	0	130	130	7.24	37	0.04	21.02	15.77	20	6.34	NaN	NaN	NaN	NaN	NaN	NaN	NaN	NaN	NaN	NaN	NaN	NaN	NaN	NaN	NaN	NaN	NaN	NaN	NaN	NaN	NaN	NaN	NaN
67.25	48.8	0.36	0.35	0	0	130	130	7.24	37	0.04	21.6	15.77	20	6.34	NaN	NaN	NaN	NaN	NaN	NaN	NaN	NaN	NaN	NaN	NaN	NaN	NaN	NaN	NaN	NaN	NaN	NaN	NaN	NaN	NaN	NaN	NaN
67.5	51.6	0.33	0.33	0	0	130	130	7.24	37	0.04	21.32	15.77	20	6.34	NaN	NaN	NaN	NaN	NaN	NaN	NaN	NaN	NaN	NaN	NaN	NaN	NaN	NaN	NaN	NaN	NaN	NaN	NaN	NaN	NaN	NaN	NaN
67.75	50.8	0.31	0.31	0	0	130	130	7.24	37	0.04	21.07	15.77	20	6.34	NaN	NaN	NaN	NaN	NaN	NaN	NaN	NaN	NaN	NaN	NaN	NaN	NaN	NaN	NaN	NaN	NaN	NaN	NaN	NaN	NaN	NaN	NaN
68	48.1	0.35	0.34	0	0	130	130	7.24	37	0.04	21.48	15.77	20	6.34	NaN	NaN	NaN	NaN	NaN	NaN	NaN	NaN	NaN	NaN	NaN	NaN	NaN	NaN	NaN	NaN	NaN	NaN	NaN	NaN	NaN	NaN	NaN
68.25	48.8	0.41	0.41	0	0.01	130	130	7.25	37	0.04	22.24	15.77	20	6.34	NaN	NaN	NaN	NaN	NaN	NaN	NaN	NaN	NaN	NaN	NaN	NaN	NaN	NaN	NaN	NaN	NaN	NaN	NaN	NaN	NaN	NaN	NaN
68.5	52.1	0.35	0.35	0	0	130	130	7.25	37	0.04	21.52	15.77	20	6.34	NaN	NaN	NaN	NaN	NaN	NaN	NaN	NaN	NaN	NaN	NaN	NaN	NaN	NaN	NaN	NaN	NaN	NaN	NaN	NaN	NaN	NaN	NaN
68.75	50.8	0.31	0.31	0	0	130	130	7.24	37	0.04	21.13	15.77	20	6.34	NaN	NaN	NaN	NaN	NaN	NaN	NaN	NaN	NaN	NaN	NaN	NaN	NaN	NaN	NaN	NaN	NaN	NaN	NaN	NaN	NaN	NaN	NaN
69	49.8	0.32	0.31	0	0	130	130	7.24	37	0.04	21.17	15.77	20	6.34	NaN	NaN	NaN	NaN	NaN	NaN	NaN	NaN	NaN	NaN	NaN	NaN	NaN	NaN	NaN	NaN	NaN	NaN	NaN	NaN	NaN	NaN	NaN
69.25	48.3	0.37	0.36	0	0	130	130	7.24	37	0.04	21.72	15.77	20	6.34	NaN	NaN	NaN	NaN	NaN	NaN	NaN	NaN	NaN	NaN	NaN	NaN	NaN	NaN	NaN	NaN	NaN	NaN	NaN	NaN	NaN	NaN	NaN
69.5	50.5	0.35	0.34	0	0	130	130	7.24	37	0.04	21.53	15.77	20	6.34	NaN	NaN	NaN	NaN	NaN	NaN	NaN	NaN	NaN	NaN	NaN	NaN	NaN	NaN	NaN	NaN	NaN	NaN	NaN	NaN	NaN	NaN	NaN
69.75	49.7	0.35	0.35	0	0	130	130	7.24	37	0.04	21.57	15.77	20	6.34	NaN	NaN	NaN	NaN	NaN	NaN	NaN	NaN	NaN	NaN	NaN	NaN	NaN	NaN	NaN	NaN	NaN	NaN	NaN	NaN	NaN	NaN	NaN
70	49.7	0.37	0.36	0	0	130	130	7.25	37	0.04	21.73	15.77	20	6.34	NaN	NaN	NaN	NaN	NaN	NaN	NaN	NaN	NaN	NaN	NaN	NaN	NaN	NaN	NaN	NaN	NaN	NaN	NaN	NaN	NaN	NaN	NaN
70.25	51	0.32	0.32	0	0	130	130	7.25	37	0.04	21.25	15.77	20	6.34	NaN	NaN	NaN	NaN	NaN	NaN	NaN	NaN	NaN	NaN	NaN	NaN	NaN	NaN	NaN	NaN	NaN	NaN	NaN	NaN	NaN	NaN	NaN
70.5	49.2	0.34	0.34	0	0	130	130	7.25	37	0.04	21.43	15.77	20	6.34	NaN	NaN	NaN	NaN	NaN	NaN	NaN	NaN	NaN	NaN	NaN	NaN	NaN	NaN	NaN	NaN	NaN	NaN	NaN	NaN	NaN	NaN	NaN
70.75	48.5	0.4	0.39	0	0.01	130	130	7.25	37	0.04	22.08	15.77	20	6.34	NaN	NaN	NaN	NaN	NaN	NaN	NaN	NaN	NaN	NaN	NaN	NaN	NaN	NaN	NaN	NaN	NaN	NaN	NaN	NaN	NaN	NaN	NaN
71	49.4	0.39	0.39	0	0	130	130	7.24	37	0.04	22.03	15.77	20	6.34	NaN	NaN	NaN	NaN	NaN	NaN	NaN	NaN	NaN	NaN	NaN	NaN	NaN	NaN	NaN	NaN	NaN	NaN	NaN	NaN	NaN	NaN	NaN
71.25	48	0.51	0.5	0	0.01	130	130	7.24	37	0.04	23.23	15.77	20	6.34	NaN	NaN	NaN	NaN	NaN	NaN	NaN	NaN	NaN	NaN	NaN	NaN	NaN	NaN	NaN	NaN	NaN	NaN	NaN	NaN	NaN	NaN	NaN
71.5	53.4	0.42	0.41	0	0.01	130	130	7.25	37	0.04	22.38	15.77	20	6.34	NaN	NaN	NaN	NaN	NaN	NaN	NaN	NaN	NaN	NaN	NaN	NaN	NaN	NaN	NaN	NaN	NaN	NaN	NaN	NaN	NaN	NaN	NaN
71.75	52.1	0.31	0.31	0	0	130	130	7.24	37	0.04	21.15	15.77	20	6.34	NaN	NaN	NaN	NaN	NaN	NaN	NaN	NaN	NaN	NaN	NaN	NaN	NaN	NaN	NaN	NaN	NaN	NaN	NaN	NaN	NaN	NaN	NaN
72	49.3	0.35	0.35	0	0	130	130	7.24	37	0.04	21.58	15.77	20	6.34	670	1.57	1.05	0	1	1.57	1.46	0.05	NaN	968750	1.50321e-06	2.78819	174	2.13	23.856	1.17179	61.4803	0.0112809	NaN	NaN	NaN	NaN	NaN
72.25	51	0.34	0.33	0	0	130	130	7.24	37	0.04	21.37	15.77	20	6.34	NaN	NaN	NaN	NaN	NaN	NaN	NaN	NaN	NaN	NaN	NaN	NaN	NaN	NaN	NaN	NaN	NaN	NaN	NaN	NaN	NaN	NaN	NaN
72.5	49.3	0.35	0.35	0	0	130	130	7.24	37	0.04	21.6	15.77	20	6.34	NaN	NaN	NaN	NaN	NaN	NaN	NaN	NaN	NaN	NaN	NaN	NaN	NaN	NaN	NaN	NaN	NaN	NaN	NaN	NaN	NaN	NaN	NaN
72.75	48.6	0.4	0.39	0	0.01	130	130	7.24	37	0.04	22.08	15.77	20	6.34	NaN	NaN	NaN	NaN	NaN	NaN	NaN	NaN	NaN	NaN	NaN	NaN	NaN	NaN	NaN	NaN	NaN	NaN	NaN	NaN	NaN	NaN	NaN
73	50.7	0.39	0.39	0	0	130	130	7.25	37	0.04	21.99	15.77	20	6.34	NaN	NaN	NaN	NaN	NaN	NaN	NaN	NaN	NaN	NaN	NaN	NaN	NaN	NaN	NaN	NaN	NaN	NaN	NaN	NaN	NaN	NaN	NaN
73.25	50.9	0.39	0.38	0	0	130	130	7.24	37	0.04	21.9	15.77	20	6.34	NaN	NaN	NaN	NaN	NaN	NaN	NaN	NaN	NaN	NaN	NaN	NaN	NaN	NaN	NaN	NaN	NaN	NaN	NaN	NaN	NaN	NaN	NaN
73.5	50.1	0.35	0.35	0	0	130	130	7.24	37	0.04	21.57	15.77	20	6.34	NaN	NaN	NaN	NaN	NaN	NaN	NaN	NaN	NaN	NaN	NaN	NaN	NaN	NaN	NaN	NaN	NaN	NaN	NaN	NaN	NaN	NaN	NaN
73.75	49.7	0.37	0.36	0	0	130	130	7.24	37	0.04	21.73	15.77	20	6.34	NaN	NaN	NaN	NaN	NaN	NaN	NaN	NaN	NaN	NaN	NaN	NaN	NaN	NaN	NaN	NaN	NaN	NaN	NaN	NaN	NaN	NaN	NaN
74	50.8	0.36	0.35	0	0	130	130	7.24	37	0.04	21.6	15.77	20	6.34	NaN	NaN	NaN	NaN	NaN	NaN	NaN	NaN	NaN	NaN	NaN	NaN	NaN	NaN	NaN	NaN	NaN	NaN	NaN	NaN	NaN	NaN	NaN
74.25	49.6	0.36	0.36	0	0	130	130	7.24	37	0.04	21.69	15.77	20	6.34	NaN	NaN	NaN	NaN	NaN	NaN	NaN	NaN	NaN	NaN	NaN	NaN	NaN	NaN	NaN	NaN	NaN	NaN	NaN	NaN	NaN	NaN	NaN
74.5	49	0.4	0.39	0	0.01	130	130	7.24	37	0.04	22.14	15.77	20	6.34	NaN	NaN	NaN	NaN	NaN	NaN	NaN	NaN	NaN	NaN	NaN	NaN	NaN	NaN	NaN	NaN	NaN	NaN	NaN	NaN	NaN	NaN	NaN
74.75	49.1	0.42	0.41	0	0.01	130	130	7.25	37	0.04	22.34	15.77	20	6.34	NaN	NaN	NaN	NaN	NaN	NaN	NaN	NaN	NaN	NaN	NaN	NaN	NaN	NaN	NaN	NaN	NaN	NaN	NaN	NaN	NaN	NaN	NaN
75	50.6	0.4	0.39	0	0.01	130	130	7.24	37	0.04	22.06	15.77	20	6.34	NaN	NaN	NaN	NaN	NaN	NaN	NaN	NaN	NaN	NaN	NaN	NaN	NaN	NaN	NaN	NaN	NaN	NaN	NaN	NaN	NaN	NaN	NaN
75.25	50.6	0.38	0.38	0	0	130	130	7.24	37	0.04	21.88	15.77	20	6.34	NaN	NaN	NaN	NaN	NaN	NaN	NaN	NaN	NaN	NaN	NaN	NaN	NaN	NaN	NaN	NaN	NaN	NaN	NaN	NaN	NaN	NaN	NaN
75.5	49.1	0.42	0.41	0	0.01	130	130	7.24	37	0.04	22.27	15.77	20	6.34	NaN	NaN	NaN	NaN	NaN	NaN	NaN	NaN	NaN	NaN	NaN	NaN	NaN	NaN	NaN	NaN	NaN	NaN	NaN	NaN	NaN	NaN	NaN
75.75	49.7	0.41	0.41	0	0.01	130	130	7.24	37	0.04	22.25	15.77	20	6.34	NaN	NaN	NaN	NaN	NaN	NaN	NaN	NaN	NaN	NaN	NaN	NaN	NaN	NaN	NaN	NaN	NaN	NaN	NaN	NaN	NaN	NaN	NaN
76	50.8	0.39	0.39	0	0.01	130	130	7.24	37	0.04	21.99	15.77	20	6.34	NaN	NaN	NaN	NaN	NaN	NaN	NaN	NaN	NaN	NaN	NaN	NaN	NaN	NaN	NaN	NaN	NaN	NaN	NaN	NaN	NaN	NaN	NaN
76.25	50.2	0.4	0.39	0	0.01	130	130	7.24	37	0.04	22.1	15.77	20	6.34	NaN	NaN	NaN	NaN	NaN	NaN	NaN	NaN	NaN	NaN	NaN	NaN	NaN	NaN	NaN	NaN	NaN	NaN	NaN	NaN	NaN	NaN	NaN
76.5	50.1	0.39	0.38	0	0	130	130	7.25	37	0.04	21.98	15.77	20	6.34	NaN	NaN	NaN	NaN	NaN	NaN	NaN	NaN	NaN	NaN	NaN	NaN	NaN	NaN	NaN	NaN	NaN	NaN	NaN	NaN	NaN	NaN	NaN
76.75	50.1	0.38	0.38	0	0	130	130	7.25	37	0.04	21.93	15.77	20	6.34	NaN	NaN	NaN	NaN	NaN	NaN	NaN	NaN	NaN	NaN	NaN	NaN	NaN	NaN	NaN	NaN	NaN	NaN	NaN	NaN	NaN	NaN	NaN
77	49.1	0.41	0.41	0	0.01	130	130	7.24	37	0.04	22.22	15.77	20	6.34	NaN	NaN	NaN	NaN	NaN	NaN	NaN	NaN	NaN	NaN	NaN	NaN	NaN	NaN	NaN	NaN	NaN	NaN	NaN	NaN	NaN	NaN	NaN
77.25	50.1	0.4	0.39	0	0.01	130	130	7.24	37	0.04	22.09	15.77	20	6.34	NaN	NaN	NaN	NaN	NaN	NaN	NaN	NaN	NaN	NaN	NaN	NaN	NaN	NaN	NaN	NaN	NaN	NaN	NaN	NaN	NaN	NaN	NaN
77.5	51.4	0.36	0.36	0	0	130	130	7.24	37	0.04	21.68	15.77	20	6.34	NaN	NaN	NaN	NaN	NaN	NaN	NaN	NaN	NaN	NaN	NaN	NaN	NaN	NaN	NaN	NaN	NaN	NaN	NaN	NaN	NaN	NaN	NaN
77.75	48.7	0.39	0.39	0	0.01	130	130	7.24	37	0.04	22.01	15.77	20	6.34	NaN	NaN	NaN	NaN	NaN	NaN	NaN	NaN	NaN	NaN	NaN	NaN	NaN	NaN	NaN	NaN	NaN	NaN	NaN	NaN	NaN	NaN	NaN
78	49.4	0.42	0.41	0	0.01	130	130	7.24	37	0.04	22.33	15.77	20	6.34	NaN	NaN	NaN	NaN	NaN	NaN	NaN	NaN	NaN	NaN	NaN	NaN	NaN	NaN	NaN	NaN	NaN	NaN	NaN	NaN	NaN	NaN	NaN
78.25	50.5	0.43	0.42	0	0.01	130	130	7.24	37	0.04	22.4	15.77	20	6.34	NaN	NaN	NaN	NaN	NaN	NaN	NaN	NaN	NaN	NaN	NaN	NaN	NaN	NaN	NaN	NaN	NaN	NaN	NaN	NaN	NaN	NaN	NaN
78.5	51.9	0.39	0.38	0	0	130	130	7.25	37	0.04	21.89	15.77	20	6.34	NaN	NaN	NaN	NaN	NaN	NaN	NaN	NaN	NaN	NaN	NaN	NaN	NaN	NaN	NaN	NaN	NaN	NaN	NaN	NaN	NaN	NaN	NaN
78.75	50.5	0.36	0.35	0	0	130	130	7.24	37	0.04	21.63	15.77	20	6.34	NaN	NaN	NaN	NaN	NaN	NaN	NaN	NaN	NaN	NaN	NaN	NaN	NaN	NaN	NaN	NaN	NaN	NaN	NaN	NaN	NaN	NaN	NaN
79	50.5	0.36	0.36	0	0	130	130	7.24	37	0.04	21.69	15.77	20	6.34	NaN	NaN	NaN	NaN	NaN	NaN	NaN	NaN	NaN	NaN	NaN	NaN	NaN	NaN	NaN	NaN	NaN	NaN	NaN	NaN	NaN	NaN	NaN
79.25	48.8	0.39	0.39	0	0	130	130	7.24	37	0.04	21.99	15.77	20	6.34	NaN	NaN	NaN	NaN	NaN	NaN	NaN	NaN	NaN	NaN	NaN	NaN	NaN	NaN	NaN	NaN	NaN	NaN	NaN	NaN	NaN	NaN	NaN
79.5	50.4	0.41	0.4	0	0.01	130	130	7.24	37	0.04	22.17	15.77	20	6.34	NaN	NaN	NaN	NaN	NaN	NaN	NaN	NaN	NaN	NaN	NaN	NaN	NaN	NaN	NaN	NaN	NaN	NaN	NaN	NaN	NaN	NaN	NaN
79.75	45.3	0.51	0.5	0	0.02	130	130	7.24	37	0.04	23.27	15.77	20	6.34	NaN	NaN	NaN	NaN	NaN	NaN	NaN	NaN	NaN	NaN	NaN	NaN	NaN	NaN	NaN	NaN	NaN	NaN	NaN	NaN	NaN	NaN	NaN
80	51	0.55	0.53	0	0.02	130	130	7.25	37	0.04	23.64	15.77	20	6.34	NaN	NaN	NaN	NaN	NaN	NaN	NaN	NaN	NaN	NaN	NaN	NaN	NaN	NaN	NaN	NaN	NaN	NaN	NaN	NaN	NaN	NaN	NaN
80.25	54.6	0.41	0.4	0	0.01	130	130	7.25	37	0.04	22.13	15.77	20	6.34	NaN	NaN	NaN	NaN	NaN	NaN	NaN	NaN	NaN	NaN	NaN	NaN	NaN	NaN	NaN	NaN	NaN	NaN	NaN	NaN	NaN	NaN	NaN
80.5	51.6	0.32	0.32	0	0	130	130	7.24	37	0.04	21.28	15.77	20	6.34	NaN	NaN	NaN	NaN	NaN	NaN	NaN	NaN	NaN	NaN	NaN	NaN	NaN	NaN	NaN	NaN	NaN	NaN	NaN	NaN	NaN	NaN	NaN
80.75	47.8	0.38	0.37	0	0	130	130	7.24	37	0.04	21.91	15.77	20	6.34	NaN	NaN	NaN	NaN	NaN	NaN	NaN	NaN	NaN	NaN	NaN	NaN	NaN	NaN	NaN	NaN	NaN	NaN	NaN	NaN	NaN	NaN	NaN
81	48.4	0.44	0.43	0	0.01	130	130	7.24	37	0.04	22.46	15.77	20	6.34	NaN	NaN	NaN	NaN	NaN	NaN	NaN	NaN	NaN	NaN	NaN	NaN	NaN	NaN	NaN	NaN	NaN	NaN	NaN	NaN	NaN	NaN	NaN
81.25	50.6	0.43	0.42	0	0.01	130	130	7.24	37	0.04	22.42	15.77	20	6.34	NaN	NaN	NaN	NaN	NaN	NaN	NaN	NaN	NaN	NaN	NaN	NaN	NaN	NaN	NaN	NaN	NaN	NaN	NaN	NaN	NaN	NaN	NaN
81.5	51.1	0.39	0.39	0	0	130	130	7.25	37	0.04	21.95	15.77	20	6.34	NaN	NaN	NaN	NaN	NaN	NaN	NaN	NaN	NaN	NaN	NaN	NaN	NaN	NaN	NaN	NaN	NaN	NaN	NaN	NaN	NaN	NaN	NaN
81.75	49.5	0.42	0.41	0	0.01	130	130	7.24	37	0.04	22.27	15.77	20	6.34	NaN	NaN	NaN	NaN	NaN	NaN	NaN	NaN	NaN	NaN	NaN	NaN	NaN	NaN	NaN	NaN	NaN	NaN	NaN	NaN	NaN	NaN	NaN
82	48	0.47	0.46	0	0.01	130	130	7.25	37	0.04	22.82	15.77	20	6.34	NaN	NaN	NaN	NaN	NaN	NaN	NaN	NaN	NaN	NaN	NaN	NaN	NaN	NaN	NaN	NaN	NaN	NaN	NaN	NaN	NaN	NaN	NaN
82.25	51.3	0.45	0.44	0	0.01	130	130	7.25	37	0.04	22.6	15.77	20	6.34	NaN	NaN	NaN	NaN	NaN	NaN	NaN	NaN	NaN	NaN	NaN	NaN	NaN	NaN	NaN	NaN	NaN	NaN	NaN	NaN	NaN	NaN	NaN
82.5	51.7	0.4	0.39	0	0.01	130	130	7.24	37	0.04	22.08	15.77	20	6.34	NaN	NaN	NaN	NaN	NaN	NaN	NaN	NaN	NaN	NaN	NaN	NaN	NaN	NaN	NaN	NaN	NaN	NaN	NaN	NaN	NaN	NaN	NaN
82.75	49.1	0.42	0.42	0	0.01	130	130	7.24	37	0.04	22.33	15.77	20	6.34	NaN	NaN	NaN	NaN	NaN	NaN	NaN	NaN	NaN	NaN	NaN	NaN	NaN	NaN	NaN	NaN	NaN	NaN	NaN	NaN	NaN	NaN	NaN
83	48.7	0.45	0.44	0	0.01	130	130	7.24	37	0.04	22.56	15.77	20	6.34	NaN	NaN	NaN	NaN	NaN	NaN	NaN	NaN	NaN	NaN	NaN	NaN	NaN	NaN	NaN	NaN	NaN	NaN	NaN	NaN	NaN	NaN	NaN
83.25	49.1	0.47	0.46	0	0.01	130	130	7.24	37	0.04	22.84	15.77	20	6.34	NaN	NaN	NaN	NaN	NaN	NaN	NaN	NaN	NaN	NaN	NaN	NaN	NaN	NaN	NaN	NaN	NaN	NaN	NaN	NaN	NaN	NaN	NaN
83.5	50.2	0.46	0.45	0	0.01	130	130	7.24	37	0.04	22.64	15.77	20	6.34	NaN	NaN	NaN	NaN	NaN	NaN	NaN	NaN	NaN	NaN	NaN	NaN	NaN	NaN	NaN	NaN	NaN	NaN	NaN	NaN	NaN	NaN	NaN
83.75	51	0.44	0.43	0	0.01	130	130	7.25	37	0.04	22.48	15.77	20	6.34	NaN	NaN	NaN	NaN	NaN	NaN	NaN	NaN	NaN	NaN	NaN	NaN	NaN	NaN	NaN	NaN	NaN	NaN	NaN	NaN	NaN	NaN	NaN
84	50.3	0.44	0.43	0	0.01	130	130	7.24	37	0.04	22.51	15.77	20	6.34	NaN	NaN	NaN	NaN	NaN	NaN	NaN	NaN	NaN	NaN	NaN	NaN	NaN	NaN	NaN	NaN	NaN	NaN	NaN	NaN	NaN	NaN	NaN
84.25	50.6	0.43	0.43	0	0.01	130	130	7.24	37	0.04	22.43	15.77	20	6.34	NaN	NaN	NaN	NaN	NaN	NaN	NaN	NaN	NaN	NaN	NaN	NaN	NaN	NaN	NaN	NaN	NaN	NaN	NaN	NaN	NaN	NaN	NaN
84.5	49.1	0.46	0.45	0	0.01	130	130	7.24	37	0.04	22.7	15.77	20	6.34	NaN	NaN	NaN	NaN	NaN	NaN	NaN	NaN	NaN	NaN	NaN	NaN	NaN	NaN	NaN	NaN	NaN	NaN	NaN	NaN	NaN	NaN	NaN
84.75	49	0.49	0.48	0	0.01	130	130	7.25	37	0.04	23.05	15.77	20	6.34	NaN	NaN	NaN	NaN	NaN	NaN	NaN	NaN	NaN	NaN	NaN	NaN	NaN	NaN	NaN	NaN	NaN	NaN	NaN	NaN	NaN	NaN	NaN
85	51.7	0.45	0.45	0	0.01	130	130	7.24	37	0.04	22.6	15.77	20	6.34	NaN	NaN	NaN	NaN	NaN	NaN	NaN	NaN	NaN	NaN	NaN	NaN	NaN	NaN	NaN	NaN	NaN	NaN	NaN	NaN	NaN	NaN	NaN
85.25	50.8	0.43	0.42	0	0.01	130	130	7.24	37	0.04	22.43	15.77	20	6.34	NaN	NaN	NaN	NaN	NaN	NaN	NaN	NaN	NaN	NaN	NaN	NaN	NaN	NaN	NaN	NaN	NaN	NaN	NaN	NaN	NaN	NaN	NaN
85.5	50.5	0.43	0.42	0	0.01	130	130	7.24	37	0.04	22.47	15.77	20	6.34	NaN	NaN	NaN	NaN	NaN	NaN	NaN	NaN	NaN	NaN	NaN	NaN	NaN	NaN	NaN	NaN	NaN	NaN	NaN	NaN	NaN	NaN	NaN
85.75	50.7	0.42	0.42	0	0.01	130	130	7.24	37	0.04	22.35	15.77	20	6.34	NaN	NaN	NaN	NaN	NaN	NaN	NaN	NaN	NaN	NaN	NaN	NaN	NaN	NaN	NaN	NaN	NaN	NaN	NaN	NaN	NaN	NaN	NaN
86	49.4	0.46	0.45	0	0.01	130	130	7.24	37	0.04	22.66	15.77	20	6.34	NaN	NaN	NaN	NaN	NaN	NaN	NaN	NaN	NaN	NaN	NaN	NaN	NaN	NaN	NaN	NaN	NaN	NaN	NaN	NaN	NaN	NaN	NaN
86.25	49.1	0.48	0.47	0	0.01	130	130	7.24	37	0.04	22.97	15.77	20	6.34	NaN	NaN	NaN	NaN	NaN	NaN	NaN	NaN	NaN	NaN	NaN	NaN	NaN	NaN	NaN	NaN	NaN	NaN	NaN	NaN	NaN	NaN	NaN
86.5	50.3	0.49	0.48	0	0.01	130	130	7.25	37	0.04	22.99	15.77	20	6.34	NaN	NaN	NaN	NaN	NaN	NaN	NaN	NaN	NaN	NaN	NaN	NaN	NaN	NaN	NaN	NaN	NaN	NaN	NaN	NaN	NaN	NaN	NaN
86.75	50.2	0.46	0.45	0	0.01	130	130	7.24	37	0.04	22.86	15.77	20	6.34	NaN	NaN	NaN	NaN	NaN	NaN	NaN	NaN	NaN	NaN	NaN	NaN	NaN	NaN	NaN	NaN	NaN	NaN	NaN	NaN	NaN	NaN	NaN
87	49.5	0.48	0.47	0	0.01	130	130	7.24	37	0.04	22.87	15.77	20	6.34	NaN	NaN	NaN	NaN	NaN	NaN	NaN	NaN	NaN	NaN	NaN	NaN	NaN	NaN	NaN	NaN	NaN	NaN	NaN	NaN	NaN	NaN	NaN
87.25	49.9	0.49	0.47	0	0.01	130	130	7.24	37	0.04	22.95	15.77	20	6.34	NaN	NaN	NaN	NaN	NaN	NaN	NaN	NaN	NaN	NaN	NaN	NaN	NaN	NaN	NaN	NaN	NaN	NaN	NaN	NaN	NaN	NaN	NaN
87.5	45.5	0.55	0.53	0	0.02	130	130	7.24	37	0.04	23.71	15.77	20	6.34	NaN	NaN	NaN	NaN	NaN	NaN	NaN	NaN	NaN	NaN	NaN	NaN	NaN	NaN	NaN	NaN	NaN	NaN	NaN	NaN	NaN	NaN	NaN
87.75	48.8	0.66	0.62	0	0.03	130	130	7.24	37	0.04	24.78	15.77	20	6.34	NaN	NaN	NaN	NaN	NaN	NaN	NaN	NaN	NaN	NaN	NaN	NaN	NaN	NaN	NaN	NaN	NaN	NaN	NaN	NaN	NaN	NaN	NaN
88	53.6	0.57	0.55	0	0.02	130	130	7.25	37	0.04	23.8	15.77	20	6.34	NaN	NaN	NaN	NaN	NaN	NaN	NaN	NaN	NaN	NaN	NaN	NaN	NaN	NaN	NaN	NaN	NaN	NaN	NaN	NaN	NaN	NaN	NaN
88.25	55.1	0.4	0.39	0	0.01	130	130	7.24	37	0.04	22.02	15.77	20	6.34	NaN	NaN	NaN	NaN	NaN	NaN	NaN	NaN	NaN	NaN	NaN	NaN	NaN	NaN	NaN	NaN	NaN	NaN	NaN	NaN	NaN	NaN	NaN
88.5	49.9	0.34	0.34	0	0	130	130	7.24	37	0.04	21.47	15.77	20	6.34	NaN	NaN	NaN	NaN	NaN	NaN	NaN	NaN	NaN	NaN	NaN	NaN	NaN	NaN	NaN	NaN	NaN	NaN	NaN	NaN	NaN	NaN	NaN
88.75	45.3	0.5	0.49	0	0.01	130	130	7.24	37	0.04	23.27	15.77	20	6.34	NaN	NaN	NaN	NaN	NaN	NaN	NaN	NaN	NaN	NaN	NaN	NaN	NaN	NaN	NaN	NaN	NaN	NaN	NaN	NaN	NaN	NaN	NaN
89	49	0.54	0.53	0	0.02	130	130	7.24	37	0.04	23.62	15.77	20	6.34	NaN	NaN	NaN	NaN	NaN	NaN	NaN	NaN	NaN	NaN	NaN	NaN	NaN	NaN	NaN	NaN	NaN	NaN	NaN	NaN	NaN	NaN	NaN
89.25	50.9	0.53	0.51	0	0.02	130	130	7.24	37	0.04	23.37	15.77	20	6.34	NaN	NaN	NaN	NaN	NaN	NaN	NaN	NaN	NaN	NaN	NaN	NaN	NaN	NaN	NaN	NaN	NaN	NaN	NaN	NaN	NaN	NaN	NaN
89.5	51.4	0.47	0.46	0	0.01	130	130	7.25	37	0.04	22.85	15.77	20	6.34	NaN	NaN	NaN	NaN	NaN	NaN	NaN	NaN	NaN	NaN	NaN	NaN	NaN	NaN	NaN	NaN	NaN	NaN	NaN	NaN	NaN	NaN	NaN
89.75	49.6	0.45	0.44	0	0.01	130	130	7.24	37	0.04	22.63	15.77	20	6.34	NaN	NaN	NaN	NaN	NaN	NaN	NaN	NaN	NaN	NaN	NaN	NaN	NaN	NaN	NaN	NaN	NaN	NaN	NaN	NaN	NaN	NaN	NaN
90	49.4	0.47	0.46	0	0.01	130	130	7.24	37	0.04	22.83	15.77	20	6.34	NaN	NaN	NaN	NaN	NaN	NaN	NaN	NaN	NaN	NaN	NaN	NaN	NaN	NaN	NaN	NaN	NaN	NaN	NaN	NaN	NaN	NaN	NaN
90.25	49.4	0.49	0.48	0	0.01	130	130	7.24	37	0.04	23.05	15.77	20	6.34	NaN	NaN	NaN	NaN	NaN	NaN	NaN	NaN	NaN	NaN	NaN	NaN	NaN	NaN	NaN	NaN	NaN	NaN	NaN	NaN	NaN	NaN	NaN
90.5	49.4	0.51	0.5	0	0.01	130	130	7.24	37	0.04	23.25	15.77	20	6.34	NaN	NaN	NaN	NaN	NaN	NaN	NaN	NaN	NaN	NaN	NaN	NaN	NaN	NaN	NaN	NaN	NaN	NaN	NaN	NaN	NaN	NaN	NaN
90.75	50.1	0.52	0.51	0	0.02	130	130	7.24	37	0.04	23.43	15.77	20	6.34	NaN	NaN	NaN	NaN	NaN	NaN	NaN	NaN	NaN	NaN	NaN	NaN	NaN	NaN	NaN	NaN	NaN	NaN	NaN	NaN	NaN	NaN	NaN
91	50.9	0.5	0.48	0	0.01	130	130	7.25	37	0.04	23.06	15.77	20	6.34	NaN	NaN	NaN	NaN	NaN	NaN	NaN	NaN	NaN	NaN	NaN	NaN	NaN	NaN	NaN	NaN	NaN	NaN	NaN	NaN	NaN	NaN	NaN
91.25	51.2	0.45	0.44	0	0.01	130	130	7.24	37	0.04	22.57	15.77	20	6.34	NaN	NaN	NaN	NaN	NaN	NaN	NaN	NaN	NaN	NaN	NaN	NaN	NaN	NaN	NaN	NaN	NaN	NaN	NaN	NaN	NaN	NaN	NaN
91.5	49	0.47	0.46	0	0.01	130	130	7.24	37	0.04	22.83	15.77	20	6.34	NaN	NaN	NaN	NaN	NaN	NaN	NaN	NaN	NaN	NaN	NaN	NaN	NaN	NaN	NaN	NaN	NaN	NaN	NaN	NaN	NaN	NaN	NaN
91.75	49	0.52	0.5	0	0.02	130	130	7.24	37	0.04	23.36	15.77	20	6.34	NaN	NaN	NaN	NaN	NaN	NaN	NaN	NaN	NaN	NaN	NaN	NaN	NaN	NaN	NaN	NaN	NaN	NaN	NaN	NaN	NaN	NaN	NaN
92	49.3	0.54	0.52	0	0.02	130	130	7.24	37	0.04	23.57	15.77	20	6.34	NaN	NaN	NaN	NaN	NaN	NaN	NaN	NaN	NaN	NaN	NaN	NaN	NaN	NaN	NaN	NaN	NaN	NaN	NaN	NaN	NaN	NaN	NaN
92.25	50.2	0.54	0.52	0	0.02	130	130	7.24	37	0.04	23.57	15.77	20	6.34	NaN	NaN	NaN	NaN	NaN	NaN	NaN	NaN	NaN	NaN	NaN	NaN	NaN	NaN	NaN	NaN	NaN	NaN	NaN	NaN	NaN	NaN	NaN
92.5	49.9	0.54	0.52	0	0.02	130	130	7.24	37	0.04	23.55	15.77	20	6.34	NaN	NaN	NaN	NaN	NaN	NaN	NaN	NaN	NaN	NaN	NaN	NaN	NaN	NaN	NaN	NaN	NaN	NaN	NaN	NaN	NaN	NaN	NaN
92.75	50.4	0.52	0.51	0	0.02	130	130	7.24	37	0.04	23.43	15.77	20	6.34	NaN	NaN	NaN	NaN	NaN	NaN	NaN	NaN	NaN	NaN	NaN	NaN	NaN	NaN	NaN	NaN	NaN	NaN	NaN	NaN	NaN	NaN	NaN
93	50.7	0.5	0.49	0	0.01	130	130	7.24	37	0.04	23.14	15.77	20	6.34	NaN	NaN	NaN	NaN	NaN	NaN	NaN	NaN	NaN	NaN	NaN	NaN	NaN	NaN	NaN	NaN	NaN	NaN	NaN	NaN	NaN	NaN	NaN
93.25	50.4	0.5	0.48	0	0.01	130	130	7.24	37	0.04	23.1	15.77	20	6.34	NaN	NaN	NaN	NaN	NaN	NaN	NaN	NaN	NaN	NaN	NaN	NaN	NaN	NaN	NaN	NaN	NaN	NaN	NaN	NaN	NaN	NaN	NaN
93.5	49.4	0.52	0.5	0	0.02	130	130	7.24	37	0.04	23.34	15.77	20	6.34	NaN	NaN	NaN	NaN	NaN	NaN	NaN	NaN	NaN	NaN	NaN	NaN	NaN	NaN	NaN	NaN	NaN	NaN	NaN	NaN	NaN	NaN	NaN
93.75	50.2	0.52	0.51	0	0.02	130	130	7.24	37	0.04	23.37	15.77	20	6.34	NaN	NaN	NaN	NaN	NaN	NaN	NaN	NaN	NaN	NaN	NaN	NaN	NaN	NaN	NaN	NaN	NaN	NaN	NaN	NaN	NaN	NaN	NaN
94	51.3	0.48	0.47	0	0.01	130	130	7.25	37	0.04	22.97	15.77	20	6.34	NaN	NaN	NaN	NaN	NaN	NaN	NaN	NaN	NaN	NaN	NaN	NaN	NaN	NaN	NaN	NaN	NaN	NaN	NaN	NaN	NaN	NaN	NaN
94.25	47	0.52	0.51	0	0.02	130	130	7.24	37	0.04	23.41	15.77	20	6.34	NaN	NaN	NaN	NaN	NaN	NaN	NaN	NaN	NaN	NaN	NaN	NaN	NaN	NaN	NaN	NaN	NaN	NaN	NaN	NaN	NaN	NaN	NaN
94.5	47.8	0.65	0.62	0	0.03	130	130	7.24	37	0.04	24.72	15.77	20	6.34	NaN	NaN	NaN	NaN	NaN	NaN	NaN	NaN	NaN	NaN	NaN	NaN	NaN	NaN	NaN	NaN	NaN	NaN	NaN	NaN	NaN	NaN	NaN
94.75	53.2	0.58	0.56	0	0.02	130	130	7.25	37	0.04	23.92	15.77	20	6.34	NaN	NaN	NaN	NaN	NaN	NaN	NaN	NaN	NaN	NaN	NaN	NaN	NaN	NaN	NaN	NaN	NaN	NaN	NaN	NaN	NaN	NaN	NaN
95	53.5	0.45	0.44	0	0.01	130	130	7.24	37	0.04	22.62	15.77	20	6.34	NaN	NaN	NaN	NaN	NaN	NaN	NaN	NaN	NaN	NaN	NaN	NaN	NaN	NaN	NaN	NaN	NaN	NaN	NaN	NaN	NaN	NaN	NaN
95.25	49.9	0.44	0.43	0	0.01	130	130	7.24	37	0.04	22.43	15.77	20	6.34	NaN	NaN	NaN	NaN	NaN	NaN	NaN	NaN	NaN	NaN	NaN	NaN	NaN	NaN	NaN	NaN	NaN	NaN	NaN	NaN	NaN	NaN	NaN
95.5	47.2	0.53	0.51	0	0.02	130	130	7.24	37	0.04	23.48	15.77	20	6.34	NaN	NaN	NaN	NaN	NaN	NaN	NaN	NaN	NaN	NaN	NaN	NaN	NaN	NaN	NaN	NaN	NaN	NaN	NaN	NaN	NaN	NaN	NaN
95.75	51	0.52	0.5	0	0.01	130	130	7.25	37	0.04	23.28	15.77	20	6.34	NaN	NaN	NaN	NaN	NaN	NaN	NaN	NaN	NaN	NaN	NaN	NaN	NaN	NaN	NaN	NaN	NaN	NaN	NaN	NaN	NaN	NaN	NaN
96	52.9	0.42	0.41	0	0.01	130	130	7.24	37	0.04	22.29	15.77	20	6.34	660	0.3	0.198	NaN	NaN	NaN	1.27	0.0529167	NaN	1217500	1.04312e-06	4.05819	174	2.52	28.224	1.50151	63.9726	0.0108414	NaN	NaN	NaN	NaN	NaN
96.25	48.9	0.43	0.42	0	0.01	130	130	7.24	37	0.04	22.39	15.77	20	6.34	NaN	NaN	NaN	NaN	NaN	NaN	NaN	NaN	NaN	NaN	NaN	NaN	NaN	NaN	NaN	NaN	NaN	NaN	NaN	NaN	NaN	NaN	NaN
96.5	47.1	0.51	0.49	0	0.01	130	130	7.24	37	0.04	23.23	15.77	20	6.34	NaN	NaN	NaN	NaN	NaN	NaN	NaN	NaN	NaN	NaN	NaN	NaN	NaN	NaN	NaN	NaN	NaN	NaN	NaN	NaN	NaN	NaN	NaN
96.75	48.8	0.56	0.54	0	0.02	130	130	7.24	37	0.04	23.78	15.77	20	6.34	NaN	NaN	NaN	1.386	2	2.295	NaN	NaN	NaN	NaN	NaN	NaN	NaN	NaN	NaN	NaN	NaN	NaN	NaN	NaN	NaN	NaN	NaN
97	51.3	0.52	0.51	0	0.02	130	130	7.25	37	0.04	23.31	15.77	20	6.34	NaN	NaN	NaN	NaN	NaN	NaN	NaN	NaN	NaN	NaN	NaN	NaN	NaN	NaN	NaN	NaN	NaN	NaN	NaN	NaN	NaN	NaN	NaN
97.25	51.7	0.45	0.44	0	0.01	130	130	7.24	37	0.04	22.72	15.77	20	6.34	NaN	NaN	NaN	NaN	NaN	NaN	NaN	NaN	NaN	NaN	NaN	NaN	NaN	NaN	NaN	NaN	NaN	NaN	NaN	NaN	NaN	NaN	NaN
97.5	47.7	0.49	0.47	0	0.01	130	130	7.24	37	0.04	23.06	15.77	20	6.34	NaN	NaN	NaN	NaN	NaN	NaN	NaN	NaN	NaN	NaN	NaN	NaN	NaN	NaN	NaN	NaN	NaN	NaN	NaN	NaN	NaN	NaN	NaN
97.75	47.9	0.56	0.54	0	0.02	130	130	7.24	37	0.04	23.76	15.77	20	6.34	NaN	NaN	NaN	NaN	NaN	NaN	NaN	NaN	NaN	NaN	NaN	NaN	NaN	NaN	NaN	NaN	NaN	NaN	NaN	NaN	NaN	NaN	NaN
98	50.8	0.56	0.54	0	0.02	130	130	7.25	37	0.04	23.75	15.77	20	6.34	NaN	NaN	NaN	NaN	NaN	NaN	NaN	NaN	NaN	NaN	NaN	NaN	NaN	NaN	NaN	NaN	NaN	NaN	NaN	NaN	NaN	NaN	NaN
98.25	51.1	0.52	0.5	0	0.02	130	130	7.24	37	0.04	23.32	15.77	20	6.34	NaN	NaN	NaN	NaN	NaN	NaN	NaN	NaN	NaN	NaN	NaN	NaN	NaN	NaN	NaN	NaN	NaN	NaN	NaN	NaN	NaN	NaN	NaN
98.5	51.4	0.49	0.48	0	0.01	130	130	7.24	37	0.04	23.02	15.77	20	6.34	NaN	NaN	NaN	NaN	NaN	NaN	NaN	NaN	NaN	NaN	NaN	NaN	NaN	NaN	NaN	NaN	NaN	NaN	NaN	NaN	NaN	NaN	NaN
98.75	49.9	0.48	0.47	0	0.01	130	130	7.24	37	0.04	22.95	15.77	20	6.34	NaN	NaN	NaN	NaN	NaN	NaN	NaN	NaN	NaN	NaN	NaN	NaN	NaN	NaN	NaN	NaN	NaN	NaN	NaN	NaN	NaN	NaN	NaN
99	49.2	0.52	0.5	0	0.02	130	130	7.24	37	0.04	23.3	15.77	20	6.34	NaN	NaN	NaN	NaN	NaN	NaN	NaN	NaN	NaN	NaN	NaN	NaN	NaN	NaN	NaN	NaN	NaN	NaN	NaN	NaN	NaN	NaN	NaN
99.25	43	0	0	0	0	70	130	7.25	36.2	0	0	15.77	20	6.34	NaN	NaN	NaN	NaN	NaN	NaN	NaN	NaN	NaN	NaN	NaN	NaN	NaN	NaN	NaN	NaN	NaN	NaN	NaN	NaN	NaN	NaN	NaN
99.5	77.6	0.3	0.29	0.01	0	130	130	7.43	36.8	2.57	21	15.77	20	6.34	NaN	NaN	NaN	NaN	NaN	NaN	NaN	NaN	NaN	NaN	NaN	NaN	NaN	NaN	NaN	NaN	NaN	NaN	NaN	NaN	NaN	NaN	NaN
99.75	60.6	0.3	0.29	0.01	0	130	130	7.42	37.8	2.61	21	15.77	20	6.34	NaN	NaN	NaN	NaN	NaN	NaN	NaN	NaN	NaN	NaN	NaN	NaN	NaN	NaN	NaN	NaN	NaN	NaN	NaN	NaN	NaN	NaN	NaN
100	51.5	0.3	0.29	0.01	0	130	130	7.41	37.1	2.92	21	15.77	20	6.34	NaN	NaN	NaN	NaN	NaN	NaN	NaN	NaN	NaN	NaN	NaN	NaN	NaN	NaN	NaN	NaN	NaN	NaN	NaN	NaN	NaN	NaN	NaN
100.25	48.4	0.34	0.32	0.01	0	130	130	7.39	37	2.66	21.44	15.77	20	6.34	NaN	NaN	NaN	NaN	NaN	NaN	NaN	NaN	NaN	NaN	NaN	NaN	NaN	NaN	NaN	NaN	NaN	NaN	NaN	NaN	NaN	NaN	NaN
100.5	44.8	0.45	0.43	0.01	0.01	130	130	7.37	37.1	2.33	22.62	15.77	20	6.34	NaN	NaN	NaN	NaN	NaN	NaN	NaN	NaN	NaN	NaN	NaN	NaN	NaN	NaN	NaN	NaN	NaN	NaN	NaN	NaN	NaN	NaN	NaN
100.75	47.1	0.58	0.54	0.01	0.03	130	130	7.36	37.1	2.35	23.93	15.77	20	6.34	NaN	NaN	NaN	NaN	NaN	NaN	NaN	NaN	NaN	NaN	NaN	NaN	NaN	NaN	NaN	NaN	NaN	NaN	NaN	NaN	NaN	NaN	NaN
101	49.8	0.54	0.52	0	0.02	130	130	7.35	37.1	0.04	23.63	15.77	20	6.34	NaN	NaN	NaN	NaN	NaN	NaN	NaN	NaN	NaN	NaN	NaN	NaN	NaN	NaN	NaN	NaN	NaN	NaN	NaN	NaN	NaN	NaN	NaN
101.25	50.7	0.52	0.5	0	0.02	130	130	7.34	37.1	0.04	23.34	15.77	20	6.34	NaN	NaN	NaN	NaN	NaN	NaN	NaN	NaN	NaN	NaN	NaN	NaN	NaN	NaN	NaN	NaN	NaN	NaN	NaN	NaN	NaN	NaN	NaN
101.5	46.4	0.57	0.55	0	0.02	130	130	7.34	37.1	0.04	23.87	15.77	20	6.34	NaN	NaN	NaN	NaN	NaN	NaN	NaN	NaN	NaN	NaN	NaN	NaN	NaN	NaN	NaN	NaN	NaN	NaN	NaN	NaN	NaN	NaN	NaN
101.75	46.7	0.7	0.66	0	0.04	130	130	7.35	37.1	0.07	25.27	15.77	20	6.34	NaN	NaN	NaN	NaN	NaN	NaN	NaN	NaN	NaN	NaN	NaN	NaN	NaN	NaN	NaN	NaN	NaN	NaN	NaN	NaN	NaN	NaN	NaN
102	53.7	0.63	0.59	0	0.03	130	130	7.37	37.1	0.52	24.48	15.77	20	6.34	NaN	NaN	NaN	NaN	NaN	NaN	NaN	NaN	NaN	NaN	NaN	NaN	NaN	NaN	NaN	NaN	NaN	NaN	NaN	NaN	NaN	NaN	NaN
102.25	54.4	0.47	0.45	0	0.01	130	130	7.38	37.1	0.91	22.8	15.77	20	6.34	NaN	NaN	NaN	NaN	NaN	NaN	NaN	NaN	NaN	NaN	NaN	NaN	NaN	NaN	NaN	NaN	NaN	NaN	NaN	NaN	NaN	NaN	NaN
102.5	51.5	0.39	0.38	0	0.01	130	130	7.38	37.1	1.17	21.93	15.77	20	6.34	NaN	NaN	NaN	NaN	NaN	NaN	NaN	NaN	NaN	NaN	NaN	NaN	NaN	NaN	NaN	NaN	NaN	NaN	NaN	NaN	NaN	NaN	NaN
102.75	50.8	0.4	0.39	0.01	0.01	130	130	7.38	37.1	1.39	22.04	15.77	20	6.34	NaN	NaN	NaN	NaN	NaN	NaN	NaN	NaN	NaN	NaN	NaN	NaN	NaN	NaN	NaN	NaN	NaN	NaN	NaN	NaN	NaN	NaN	NaN
103	47.3	0.45	0.44	0.01	0.01	130	130	7.37	37.1	1.33	22.67	15.77	20	6.34	NaN	NaN	NaN	NaN	NaN	NaN	NaN	NaN	NaN	NaN	NaN	NaN	NaN	NaN	NaN	NaN	NaN	NaN	NaN	NaN	NaN	NaN	NaN
103.25	46.6	0.59	0.56	0.01	0.03	130	130	7.37	37	1.26	24.07	15.77	20	6.34	NaN	NaN	NaN	NaN	NaN	NaN	NaN	NaN	NaN	NaN	NaN	NaN	NaN	NaN	NaN	NaN	NaN	NaN	NaN	NaN	NaN	NaN	NaN
103.5	48.5	0.62	0.59	0.01	0.03	130	130	7.35	37.1	1.12	24.43	15.77	20	6.34	NaN	NaN	NaN	NaN	NaN	NaN	NaN	NaN	NaN	NaN	NaN	NaN	NaN	NaN	NaN	NaN	NaN	NaN	NaN	NaN	NaN	NaN	NaN
103.75	50.9	0.59	0.57	0	0.02	130	130	7.35	37	0.04	24.09	15.77	20	6.34	NaN	NaN	NaN	NaN	NaN	NaN	NaN	NaN	NaN	NaN	NaN	NaN	NaN	NaN	NaN	NaN	NaN	NaN	NaN	NaN	NaN	NaN	NaN
104	51.4	0.56	0.54	0	0.02	130	130	7.35	37.1	0.09	23.73	15.77	20	6.34	NaN	NaN	NaN	NaN	NaN	NaN	NaN	NaN	NaN	NaN	NaN	NaN	NaN	NaN	NaN	NaN	NaN	NaN	NaN	NaN	NaN	NaN	NaN
104.25	49.7	0.53	0.51	0	0.02	130	130	7.36	37	0.22	23.46	15.77	20	6.34	NaN	NaN	NaN	NaN	NaN	NaN	NaN	NaN	NaN	NaN	NaN	NaN	NaN	NaN	NaN	NaN	NaN	NaN	NaN	NaN	NaN	NaN	NaN
104.5	48.6	0.57	0.55	0	0.02	130	130	7.36	37	0.42	23.89	15.77	20	6.34	NaN	NaN	NaN	NaN	NaN	NaN	NaN	NaN	NaN	NaN	NaN	NaN	NaN	NaN	NaN	NaN	NaN	NaN	NaN	NaN	NaN	NaN	NaN
104.75	50.4	0.58	0.55	0	0.02	130	130	7.37	37	0.64	23.9	15.77	20	6.34	NaN	NaN	NaN	NaN	NaN	NaN	NaN	NaN	NaN	NaN	NaN	NaN	NaN	NaN	NaN	NaN	NaN	NaN	NaN	NaN	NaN	NaN	NaN
105	51.4	0.56	0.54	0.01	0.02	130	130	7.38	37	0.96	23.78	15.77	20	6.34	NaN	NaN	NaN	NaN	NaN	NaN	NaN	NaN	NaN	NaN	NaN	NaN	NaN	NaN	NaN	NaN	NaN	NaN	NaN	NaN	NaN	NaN	NaN
105.25	51.7	0.52	0.5	0.01	0.02	130	130	7.38	37	1.24	23.32	15.77	20	6.34	NaN	NaN	NaN	NaN	NaN	NaN	NaN	NaN	NaN	NaN	NaN	NaN	NaN	NaN	NaN	NaN	NaN	NaN	NaN	NaN	NaN	NaN	NaN
105.5	52	0.47	0.45	0.01	0.01	130	130	7.37	37	1.31	22.83	15.77	20	6.34	NaN	NaN	NaN	NaN	NaN	NaN	NaN	NaN	NaN	NaN	NaN	NaN	NaN	NaN	NaN	NaN	NaN	NaN	NaN	NaN	NaN	NaN	NaN
105.75	45.6	0.58	0.55	0	0.02	130	130	7.35	37	0.9	24	15.77	20	6.34	NaN	NaN	NaN	NaN	NaN	NaN	NaN	NaN	NaN	NaN	NaN	NaN	NaN	NaN	NaN	NaN	NaN	NaN	NaN	NaN	NaN	NaN	NaN
106	46.2	0.73	0.69	0	0.04	130	130	7.34	37	0.04	25.21	15.77	20	6.34	NaN	NaN	NaN	NaN	NaN	NaN	NaN	NaN	NaN	NaN	NaN	NaN	NaN	NaN	NaN	NaN	NaN	NaN	NaN	NaN	NaN	NaN	NaN
106.25	49.7	0.8	0.74	0	0.05	130	130	7.34	37	0.04	26.33	15.77	20	6.34	NaN	NaN	NaN	NaN	NaN	NaN	NaN	NaN	NaN	NaN	NaN	NaN	NaN	NaN	NaN	NaN	NaN	NaN	NaN	NaN	NaN	NaN	NaN
106.5	58.2	0.56	0.54	0	0.02	130	130	7.35	37	0.07	23.71	15.77	20	6.34	NaN	NaN	NaN	NaN	NaN	NaN	NaN	NaN	NaN	NaN	NaN	NaN	NaN	NaN	NaN	NaN	NaN	NaN	NaN	NaN	NaN	NaN	NaN
106.75	55.7	0.34	0.33	0	0	130	130	7.35	37	0.13	21.41	15.77	20	6.34	NaN	NaN	NaN	NaN	NaN	NaN	NaN	NaN	NaN	NaN	NaN	NaN	NaN	NaN	NaN	NaN	NaN	NaN	NaN	NaN	NaN	NaN	NaN
107	49.6	0.32	0.32	0	0	130	130	7.35	37	0.04	21.19	15.77	20	6.34	NaN	NaN	NaN	NaN	NaN	NaN	NaN	NaN	NaN	NaN	NaN	NaN	NaN	NaN	NaN	NaN	NaN	NaN	NaN	NaN	NaN	NaN	NaN
107.25	45	0.45	0.44	0	0.01	130	130	7.34	37	0.04	22.63	15.77	20	6.34	NaN	NaN	NaN	NaN	NaN	NaN	NaN	NaN	NaN	NaN	NaN	NaN	NaN	NaN	NaN	NaN	NaN	NaN	NaN	NaN	NaN	NaN	NaN
107.5	43.7	0.68	0.64	0	0.03	130	130	7.34	37	0.04	25.04	15.77	20	6.34	NaN	NaN	NaN	NaN	NaN	NaN	NaN	NaN	NaN	NaN	NaN	NaN	NaN	NaN	NaN	NaN	NaN	NaN	NaN	NaN	NaN	NaN	NaN
107.75	49.7	0.72	0.68	0	0.04	130	130	7.35	37	0.04	25.38	15.77	20	6.34	NaN	NaN	NaN	NaN	NaN	NaN	NaN	NaN	NaN	NaN	NaN	NaN	NaN	NaN	NaN	NaN	NaN	NaN	NaN	NaN	NaN	NaN	NaN
108	53.4	0.63	0.6	0	0.03	130	130	7.35	37	0.05	24.46	15.77	20	6.34	NaN	NaN	NaN	NaN	NaN	NaN	NaN	NaN	NaN	NaN	NaN	NaN	NaN	NaN	NaN	NaN	NaN	NaN	NaN	NaN	NaN	NaN	NaN
108.25	55.2	0.47	0.46	0	0.01	130	130	7.35	37	0.12	22.81	15.77	20	6.34	NaN	NaN	NaN	NaN	NaN	NaN	NaN	NaN	NaN	NaN	NaN	NaN	NaN	NaN	NaN	NaN	NaN	NaN	NaN	NaN	NaN	NaN	NaN
108.5	49.9	0.42	0.41	0	0.01	130	130	7.35	37	0.04	22.29	15.77	20	6.34	NaN	NaN	NaN	NaN	NaN	NaN	NaN	NaN	NaN	NaN	NaN	NaN	NaN	NaN	NaN	NaN	NaN	NaN	NaN	NaN	NaN	NaN	NaN
108.75	45.2	0.55	0.53	0	0.02	130	130	7.34	37	0.04	23.68	15.77	20	6.34	NaN	NaN	NaN	NaN	NaN	NaN	NaN	NaN	NaN	NaN	NaN	NaN	NaN	NaN	NaN	NaN	NaN	NaN	NaN	NaN	NaN	NaN	NaN
109	47.1	0.7	0.66	0	0.04	130	130	7.34	37	0.04	25.3	15.77	20	6.34	NaN	NaN	NaN	NaN	NaN	NaN	NaN	NaN	NaN	NaN	NaN	NaN	NaN	NaN	NaN	NaN	NaN	NaN	NaN	NaN	NaN	NaN	NaN
109.25	52.2	0.66	0.63	0	0.03	130	130	7.34	37	0.04	24.89	15.77	20	6.34	NaN	NaN	NaN	NaN	NaN	NaN	NaN	NaN	NaN	NaN	NaN	NaN	NaN	NaN	NaN	NaN	NaN	NaN	NaN	NaN	NaN	NaN	NaN
109.5	51.4	0.57	0.55	0	0.02	130	130	7.34	37	0.04	23.97	15.77	20	6.34	NaN	NaN	NaN	NaN	NaN	NaN	NaN	NaN	NaN	NaN	NaN	NaN	NaN	NaN	NaN	NaN	NaN	NaN	NaN	NaN	NaN	NaN	NaN
109.75	49.4	0.59	0.56	0	0.02	130	130	7.34	37	0.04	24.07	15.77	20	6.34	NaN	NaN	NaN	NaN	NaN	NaN	NaN	NaN	NaN	NaN	NaN	NaN	NaN	NaN	NaN	NaN	NaN	NaN	NaN	NaN	NaN	NaN	NaN
110	49.2	0.61	0.58	0	0.03	130	130	7.34	37	0.04	24.47	15.77	20	6.34	NaN	NaN	NaN	NaN	NaN	NaN	NaN	NaN	NaN	NaN	NaN	NaN	NaN	NaN	NaN	NaN	NaN	NaN	NaN	NaN	NaN	NaN	NaN
110.25	50	0.65	0.62	0	0.03	130	130	7.33	37	0.04	24.57	15.77	20	6.34	NaN	NaN	NaN	NaN	NaN	NaN	NaN	NaN	NaN	NaN	NaN	NaN	NaN	NaN	NaN	NaN	NaN	NaN	NaN	NaN	NaN	NaN	NaN
110.5	50.1	0.64	0.61	0	0.03	130	130	7.33	37	0.04	24.42	15.77	20	6.34	NaN	NaN	NaN	NaN	NaN	NaN	NaN	NaN	NaN	NaN	NaN	NaN	NaN	NaN	NaN	NaN	NaN	NaN	NaN	NaN	NaN	NaN	NaN
110.75	48.3	0.67	0.63	0	0.03	130	130	7.33	37	0.04	24.96	15.77	20	6.34	NaN	NaN	NaN	NaN	NaN	NaN	NaN	NaN	NaN	NaN	NaN	NaN	NaN	NaN	NaN	NaN	NaN	NaN	NaN	NaN	NaN	NaN	NaN
111	52	0.63	0.6	0	0.03	130	130	7.33	37	0.04	24.43	15.77	20	6.34	NaN	NaN	NaN	NaN	NaN	NaN	NaN	NaN	NaN	NaN	NaN	NaN	NaN	NaN	NaN	NaN	NaN	NaN	NaN	NaN	NaN	NaN	NaN
111.25	52.5	0.53	0.51	0	0.02	130	130	7.33	37	0.04	23.48	15.77	20	6.34	NaN	NaN	NaN	NaN	NaN	NaN	NaN	NaN	NaN	NaN	NaN	NaN	NaN	NaN	NaN	NaN	NaN	NaN	NaN	NaN	NaN	NaN	NaN
111.5	49.6	0.53	0.52	0	0.02	130	130	7.32	37	0.04	23.4	15.77	20	6.34	NaN	NaN	NaN	NaN	NaN	NaN	NaN	NaN	NaN	NaN	NaN	NaN	NaN	NaN	NaN	NaN	NaN	NaN	NaN	NaN	NaN	NaN	NaN
111.75	46.1	0.64	0.61	0	0.03	130	130	7.31	37	0.04	24.6	15.77	20	6.34	NaN	NaN	NaN	NaN	NaN	NaN	NaN	NaN	NaN	NaN	NaN	NaN	NaN	NaN	NaN	NaN	NaN	NaN	NaN	NaN	NaN	NaN	NaN
112	49.2	0.69	0.65	0	0.04	130	130	7.31	37	0.04	25.1	15.77	20	6.34	NaN	NaN	NaN	NaN	NaN	NaN	NaN	NaN	NaN	NaN	NaN	NaN	NaN	NaN	NaN	NaN	NaN	NaN	NaN	NaN	NaN	NaN	NaN
112.25	52	0.63	0.6	0	0.03	130	130	7.31	37	0.04	24.59	15.77	20	6.34	NaN	NaN	NaN	NaN	NaN	NaN	NaN	NaN	NaN	NaN	NaN	NaN	NaN	NaN	NaN	NaN	NaN	NaN	NaN	NaN	NaN	NaN	NaN
112.5	51.1	0.59	0.57	0	0.02	130	130	7.3	37	0.04	24.07	15.77	20	6.34	NaN	NaN	NaN	NaN	NaN	NaN	NaN	NaN	NaN	NaN	NaN	NaN	NaN	NaN	NaN	NaN	NaN	NaN	NaN	NaN	NaN	NaN	NaN
112.75	48.9	0.61	0.58	0	0.03	130	130	7.3	37	0.04	24.3	15.77	20	6.34	NaN	NaN	NaN	NaN	NaN	NaN	NaN	NaN	NaN	NaN	NaN	NaN	NaN	NaN	NaN	NaN	NaN	NaN	NaN	NaN	NaN	NaN	NaN
113	48.1	0.68	0.65	0	0.04	130	130	7.3	37	0.04	25.07	15.77	20	6.34	NaN	NaN	NaN	NaN	NaN	NaN	NaN	NaN	NaN	NaN	NaN	NaN	NaN	NaN	NaN	NaN	NaN	NaN	NaN	NaN	NaN	NaN	NaN
113.25	50	0.71	0.67	0	0.04	130	130	7.29	37	0.04	25.34	15.77	20	6.34	NaN	NaN	NaN	NaN	NaN	NaN	NaN	NaN	NaN	NaN	NaN	NaN	NaN	NaN	NaN	NaN	NaN	NaN	NaN	NaN	NaN	NaN	NaN
113.5	53.2	0.62	0.59	0	0.03	130	130	7.29	37	0.04	24.38	15.77	20	6.34	NaN	NaN	NaN	NaN	NaN	NaN	NaN	NaN	NaN	NaN	NaN	NaN	NaN	NaN	NaN	NaN	NaN	NaN	NaN	NaN	NaN	NaN	NaN
113.75	52.1	0.53	0.52	0	0.02	130	130	7.29	37	0.04	23.48	15.77	20	6.34	NaN	NaN	NaN	NaN	NaN	NaN	NaN	NaN	NaN	NaN	NaN	NaN	NaN	NaN	NaN	NaN	NaN	NaN	NaN	NaN	NaN	NaN	NaN
114	47.1	0.61	0.58	0	0.03	130	130	7.28	37	0.04	24.23	15.77	20	6.34	NaN	NaN	NaN	NaN	NaN	NaN	NaN	NaN	NaN	NaN	NaN	NaN	NaN	NaN	NaN	NaN	NaN	NaN	NaN	NaN	NaN	NaN	NaN
114.25	46.5	0.72	0.68	0	0.04	130	130	7.27	37	0.04	25.52	15.77	20	6.34	NaN	NaN	NaN	NaN	NaN	NaN	NaN	NaN	NaN	NaN	NaN	NaN	NaN	NaN	NaN	NaN	NaN	NaN	NaN	NaN	NaN	NaN	NaN
114.5	49.4	0.77	0.72	0	0.05	130	130	7.27	37	0.04	25.95	15.77	20	6.34	NaN	NaN	NaN	NaN	NaN	NaN	NaN	NaN	NaN	NaN	NaN	NaN	NaN	NaN	NaN	NaN	NaN	NaN	NaN	NaN	NaN	NaN	NaN
114.75	52.4	0.7	0.66	0	0.04	130	130	7.27	37	0.04	25.18	15.77	20	6.34	NaN	NaN	NaN	NaN	NaN	NaN	NaN	NaN	NaN	NaN	NaN	NaN	NaN	NaN	NaN	NaN	NaN	NaN	NaN	NaN	NaN	NaN	NaN
115	49.7	0.67	0.64	0	0.03	130	130	7.26	37	0.04	24.93	15.77	20	6.34	NaN	NaN	NaN	NaN	NaN	NaN	NaN	NaN	NaN	NaN	NaN	NaN	NaN	NaN	NaN	NaN	NaN	NaN	NaN	NaN	NaN	NaN	NaN
115.25	48.1	0.73	0.68	0	0.04	130	130	7.26	37	0.04	25.55	15.77	20	6.34	NaN	NaN	NaN	NaN	NaN	NaN	NaN	NaN	NaN	NaN	NaN	NaN	NaN	NaN	NaN	NaN	NaN	NaN	NaN	NaN	NaN	NaN	NaN
115.5	51.3	0.72	0.68	0	0.04	130	130	7.26	37	0.04	25.49	15.77	20	6.34	NaN	NaN	NaN	NaN	NaN	NaN	NaN	NaN	NaN	NaN	NaN	NaN	NaN	NaN	NaN	NaN	NaN	NaN	NaN	NaN	NaN	NaN	NaN
115.75	53.9	0.61	0.58	0	0.02	130	130	7.25	37	0.04	24.24	15.77	20	6.34	NaN	NaN	NaN	NaN	NaN	NaN	NaN	NaN	NaN	NaN	NaN	NaN	NaN	NaN	NaN	NaN	NaN	NaN	NaN	NaN	NaN	NaN	NaN
116	49.7	0.59	0.57	0	0.02	130	130	7.24	37	0.04	24.09	15.77	20	6.34	NaN	NaN	NaN	NaN	NaN	NaN	NaN	NaN	NaN	NaN	NaN	NaN	NaN	NaN	NaN	NaN	NaN	NaN	NaN	NaN	NaN	NaN	NaN
116.25	46.9	0.69	0.65	0	0.04	130	130	7.24	37	0.04	25.19	15.77	20	6.34	NaN	NaN	NaN	NaN	NaN	NaN	NaN	NaN	NaN	NaN	NaN	NaN	NaN	NaN	NaN	NaN	NaN	NaN	NaN	NaN	NaN	NaN	NaN
116.5	49.6	0.74	0.69	0	0.04	130	130	7.24	37	0.04	25.62	15.77	20	6.34	NaN	NaN	NaN	NaN	NaN	NaN	NaN	NaN	NaN	NaN	NaN	NaN	NaN	NaN	NaN	NaN	NaN	NaN	NaN	NaN	NaN	NaN	NaN
116.75	46	0.86	0.79	0	0.06	130	130	7.24	37	0.04	26.93	15.77	20	6.34	NaN	NaN	NaN	NaN	NaN	NaN	NaN	NaN	NaN	NaN	NaN	NaN	NaN	NaN	NaN	NaN	NaN	NaN	NaN	NaN	NaN	NaN	NaN
117	53.6	0.79	0.74	0	0.05	130	130	7.25	37	0.04	26.21	15.77	20	6.34	650	0.9	0.585	0	1	1	1.395	0.0664286	1800000	1792500	7.78243e-07	5.45319	187	2.76	30.912	2.05956	56.8411	0.0122016	NaN	NaN	NaN	NaN	NaN
117.25	56.8	0.57	0.55	0	0.02	130	130	7.25	37	0.04	23.84	15.77	20	6.34	NaN	NaN	NaN	NaN	NaN	NaN	NaN	NaN	NaN	NaN	NaN	NaN	NaN	NaN	NaN	NaN	NaN	NaN	NaN	NaN	NaN	NaN	NaN
117.5	53.4	0.43	0.42	0	0.01	130	130	7.24	37	0.04	22.39	15.77	20	6.34	NaN	NaN	NaN	NaN	NaN	NaN	NaN	NaN	NaN	NaN	NaN	NaN	NaN	NaN	NaN	NaN	NaN	NaN	NaN	NaN	NaN	NaN	NaN
117.75	46.1	0.53	0.52	0	0.02	130	130	7.23	37	0.04	23.47	15.77	20	6.34	NaN	NaN	NaN	NaN	NaN	NaN	NaN	NaN	NaN	NaN	NaN	NaN	NaN	NaN	NaN	NaN	NaN	NaN	NaN	NaN	NaN	NaN	NaN
118	44.2	0.71	0.67	0	0.04	130	130	7.24	37	0.04	25.43	15.77	20	6.34	NaN	NaN	NaN	NaN	NaN	NaN	NaN	NaN	NaN	NaN	NaN	NaN	NaN	NaN	NaN	NaN	NaN	NaN	NaN	NaN	NaN	NaN	NaN
118.25	49.8	0.78	0.73	0	0.05	130	130	7.24	37	0.04	26.03	15.77	20	6.34	NaN	NaN	NaN	NaN	NaN	NaN	NaN	NaN	NaN	NaN	NaN	NaN	NaN	NaN	NaN	NaN	NaN	NaN	NaN	NaN	NaN	NaN	NaN
118.5	53.7	0.66	0.63	0	0.03	130	130	7.25	37	0.04	24.81	15.77	20	6.34	NaN	NaN	NaN	NaN	NaN	NaN	NaN	NaN	NaN	NaN	NaN	NaN	NaN	NaN	NaN	NaN	NaN	NaN	NaN	NaN	NaN	NaN	NaN
118.75	50.3	0.62	0.59	0	0.03	130	130	7.24	37	0.04	24.39	15.77	20	6.34	NaN	NaN	NaN	NaN	NaN	NaN	NaN	NaN	NaN	NaN	NaN	NaN	NaN	NaN	NaN	NaN	NaN	NaN	NaN	NaN	NaN	NaN	NaN
119	48.2	0.67	0.63	0	0.03	130	130	7.24	37	0.04	24.85	15.77	20	6.34	NaN	NaN	NaN	NaN	NaN	NaN	NaN	NaN	NaN	NaN	NaN	NaN	NaN	NaN	NaN	NaN	NaN	NaN	NaN	NaN	NaN	NaN	NaN
119.25	49.5	0.68	0.65	0	0.04	130	130	7.24	37	0.04	25.08	15.77	20	6.34	NaN	NaN	NaN	NaN	NaN	NaN	NaN	NaN	NaN	NaN	NaN	NaN	NaN	NaN	NaN	NaN	NaN	NaN	NaN	NaN	NaN	NaN	NaN
119.5	49.3	0.71	0.67	0	0.04	130	130	7.24	37	0.04	25.33	15.77	20	6.34	NaN	NaN	NaN	NaN	NaN	NaN	NaN	NaN	NaN	NaN	NaN	NaN	NaN	NaN	NaN	NaN	NaN	NaN	NaN	NaN	NaN	NaN	NaN
119.75	50.9	0.69	0.65	0	0.04	130	130	7.25	37	0.04	25.08	15.77	20	6.34	NaN	NaN	NaN	NaN	NaN	NaN	NaN	NaN	NaN	NaN	NaN	NaN	NaN	NaN	NaN	NaN	NaN	NaN	NaN	NaN	NaN	NaN	NaN
0	135.6	0.3	0.26	0.03	0.01	80	80	7.51	35	8.71	21	3.74	4	5.35	700	3.32	2.32	0	2.32	3.32	0	0	86000	86000	0	0	0	0	0	0	0	0	1.47	1.47	0	0	4
0.25	130.2	0.3	0.26	0.03	0.01	80	80	7.52	36.6	10.06	21	3.74	4	5.35	NaN	NaN	NaN	NaN	NaN	NaN	NaN	NaN	NaN	NaN	NaN	NaN	NaN	NaN	NaN	NaN	NaN	NaN	NaN	NaN	NaN	NaN	NaN
0.5	128.6	0.3	0.26	0.03	0.01	80	80	7.49	37.6	9.86	21	3.74	4	5.35	NaN	NaN	NaN	NaN	NaN	NaN	NaN	NaN	NaN	NaN	NaN	NaN	NaN	NaN	NaN	NaN	NaN	NaN	NaN	NaN	NaN	NaN	NaN
0.75	126.2	0.3	0.26	0.03	0.01	80	80	7.46	37.2	9.82	21	3.74	4	5.35	NaN	NaN	NaN	NaN	NaN	NaN	NaN	NaN	NaN	NaN	NaN	NaN	NaN	NaN	NaN	NaN	NaN	NaN	NaN	NaN	NaN	NaN	NaN
1	125.1	0.3	0.26	0.03	0.01	80	80	7.44	37	9.64	21	3.74	4	5.35	NaN	NaN	NaN	NaN	NaN	NaN	NaN	NaN	NaN	NaN	NaN	NaN	NaN	NaN	NaN	NaN	NaN	NaN	NaN	NaN	NaN	NaN	NaN
1.25	125.7	0.3	0.26	0.03	0.01	80	80	7.43	37	9.4	21	3.74	4	5.35	NaN	NaN	NaN	NaN	NaN	NaN	NaN	NaN	NaN	NaN	NaN	NaN	NaN	NaN	NaN	NaN	NaN	NaN	NaN	NaN	NaN	NaN	NaN
1.5	124	0.3	0.26	0.03	0.01	80	80	7.41	37	9.05	21	3.74	4	5.35	NaN	NaN	NaN	NaN	NaN	NaN	NaN	NaN	NaN	NaN	NaN	NaN	NaN	NaN	NaN	NaN	NaN	NaN	NaN	NaN	NaN	NaN	NaN
1.75	123.3	0.3	0.3	0	0	80	80	7.39	37.1	0.04	21	3.74	4	5.35	NaN	NaN	NaN	NaN	NaN	NaN	NaN	NaN	NaN	NaN	NaN	NaN	NaN	NaN	NaN	NaN	NaN	NaN	NaN	NaN	NaN	NaN	NaN
2	122	0.3	0.3	0	0	80	80	7.4	37.1	0.04	21	3.74	4	5.35	NaN	NaN	NaN	NaN	NaN	NaN	NaN	NaN	NaN	NaN	NaN	NaN	NaN	NaN	NaN	NaN	NaN	NaN	NaN	NaN	NaN	NaN	NaN
2.25	121.1	0.3	0.3	0	0	80	80	7.41	37.1	0.16	21	3.74	4	5.35	NaN	NaN	NaN	NaN	NaN	NaN	NaN	NaN	NaN	NaN	NaN	NaN	NaN	NaN	NaN	NaN	NaN	NaN	NaN	NaN	NaN	NaN	NaN
2.5	120.3	0.3	0.3	0	0	80	80	7.42	37.1	0.66	21	3.74	4	5.35	NaN	NaN	NaN	NaN	NaN	NaN	NaN	NaN	NaN	NaN	NaN	NaN	NaN	NaN	NaN	NaN	NaN	NaN	NaN	NaN	NaN	NaN	NaN
2.75	119.8	0.3	0.29	0	0	80	80	7.44	37	1.32	21	3.74	4	5.35	NaN	NaN	NaN	NaN	NaN	NaN	NaN	NaN	NaN	NaN	NaN	NaN	NaN	NaN	NaN	NaN	NaN	NaN	NaN	NaN	NaN	NaN	NaN
3	119.4	0.3	0.29	0.01	0	80	80	7.46	37	2.15	21	3.74	4	5.35	NaN	NaN	NaN	NaN	NaN	NaN	NaN	NaN	NaN	NaN	NaN	NaN	NaN	NaN	NaN	NaN	NaN	NaN	NaN	NaN	NaN	NaN	NaN
3.25	118.8	0.3	0.28	0.01	0	80	80	7.48	37	4.5	21	3.74	4	5.35	NaN	NaN	NaN	NaN	NaN	NaN	NaN	NaN	NaN	NaN	NaN	NaN	NaN	NaN	NaN	NaN	NaN	NaN	NaN	NaN	NaN	NaN	NaN
3.5	118.7	0.3	0.28	0.02	0	80	80	7.48	37.1	5.36	21	3.74	4	5.35	NaN	NaN	NaN	NaN	NaN	NaN	NaN	NaN	NaN	NaN	NaN	NaN	NaN	NaN	NaN	NaN	NaN	NaN	NaN	NaN	NaN	NaN	NaN
3.75	118.4	0.3	0.27	0.02	0	80	80	7.48	37.1	6.22	21	3.74	4	5.35	NaN	NaN	NaN	NaN	NaN	NaN	NaN	NaN	NaN	NaN	NaN	NaN	NaN	NaN	NaN	NaN	NaN	NaN	NaN	NaN	NaN	NaN	NaN
4	118.4	0.3	0.27	0.02	0.01	80	80	7.47	37	6.86	21	3.74	4	5.35	NaN	NaN	NaN	NaN	NaN	NaN	NaN	NaN	NaN	NaN	NaN	NaN	NaN	NaN	NaN	NaN	NaN	NaN	NaN	NaN	NaN	NaN	NaN
4.25	119	0.3	0.27	0.02	0.01	80	80	7.47	37	7.47	21	3.74	4	5.35	NaN	NaN	NaN	NaN	NaN	NaN	NaN	NaN	NaN	NaN	NaN	NaN	NaN	NaN	NaN	NaN	NaN	NaN	NaN	NaN	NaN	NaN	NaN
4.5	119.2	0.3	0.27	0.02	0.01	80	80	7.46	37	8.01	21	3.74	4	5.35	NaN	NaN	NaN	NaN	NaN	NaN	NaN	NaN	NaN	NaN	NaN	NaN	NaN	NaN	NaN	NaN	NaN	NaN	NaN	NaN	NaN	NaN	NaN
4.75	119.7	0.3	0.27	0.03	0.01	80	80	7.45	37	8.46	21	3.74	4	5.35	NaN	NaN	NaN	NaN	NaN	NaN	NaN	NaN	NaN	NaN	NaN	NaN	NaN	NaN	NaN	NaN	NaN	NaN	NaN	NaN	NaN	NaN	NaN
5	119.9	0.3	0.26	0.03	0.01	80	80	7.44	37	8.68	21	3.74	4	5.35	NaN	NaN	NaN	NaN	NaN	NaN	NaN	NaN	NaN	NaN	NaN	NaN	NaN	NaN	NaN	NaN	NaN	NaN	NaN	NaN	NaN	NaN	NaN
5.25	120.6	0.3	0.27	0.03	0.01	80	80	7.42	37	8.84	21	3.74	4	5.35	NaN	NaN	NaN	NaN	NaN	NaN	NaN	NaN	NaN	NaN	NaN	NaN	NaN	NaN	NaN	NaN	NaN	NaN	NaN	NaN	NaN	NaN	NaN
5.5	120.7	0.3	0.27	0.03	0.01	80	80	7.41	37	8.93	21	3.74	4	5.35	NaN	NaN	NaN	NaN	NaN	NaN	NaN	NaN	NaN	NaN	NaN	NaN	NaN	NaN	NaN	NaN	NaN	NaN	NaN	NaN	NaN	NaN	NaN
5.75	120.7	0.3	0.27	0.03	0.01	80	80	7.39	37	8.81	21	3.74	4	5.35	NaN	NaN	NaN	NaN	NaN	NaN	NaN	NaN	NaN	NaN	NaN	NaN	NaN	NaN	NaN	NaN	NaN	NaN	NaN	NaN	NaN	NaN	NaN
6	122	0.3	0.26	0.03	0.01	80	80	7.39	37	8.89	21	3.74	4	5.35	NaN	NaN	NaN	NaN	NaN	NaN	NaN	NaN	NaN	NaN	NaN	NaN	NaN	NaN	NaN	NaN	NaN	NaN	NaN	NaN	NaN	NaN	NaN
6.25	120.4	0.3	0.27	0.03	0.01	80	80	7.37	37	8.68	21	3.74	4	5.35	NaN	NaN	NaN	NaN	NaN	NaN	NaN	NaN	NaN	NaN	NaN	NaN	NaN	NaN	NaN	NaN	NaN	NaN	NaN	NaN	NaN	NaN	NaN
6.5	120.3	0.3	0.27	0.03	0.01	80	80	7.36	37	8.45	21	3.74	4	5.35	NaN	NaN	NaN	NaN	NaN	NaN	NaN	NaN	NaN	NaN	NaN	NaN	NaN	NaN	NaN	NaN	NaN	NaN	NaN	NaN	NaN	NaN	NaN
6.75	120.1	0.3	0.29	0	0	80	80	7.35	37	0.04	21	3.74	4	5.35	NaN	NaN	NaN	NaN	NaN	NaN	NaN	NaN	NaN	NaN	NaN	NaN	NaN	NaN	NaN	NaN	NaN	NaN	NaN	NaN	NaN	NaN	NaN
7	120	0.3	0.3	0	0	80	80	7.35	37	0.04	21	3.74	4	5.35	NaN	NaN	NaN	NaN	NaN	NaN	NaN	NaN	NaN	NaN	NaN	NaN	NaN	NaN	NaN	NaN	NaN	NaN	NaN	NaN	NaN	NaN	NaN
7.25	118.9	0.3	0.3	0	0	80	80	7.36	37	0.27	21	3.74	4	5.35	NaN	NaN	NaN	NaN	NaN	NaN	NaN	NaN	NaN	NaN	NaN	NaN	NaN	NaN	NaN	NaN	NaN	NaN	NaN	NaN	NaN	NaN	NaN
7.5	118.2	0.3	0.3	0	0	80	80	7.38	37	0.78	21	3.74	4	5.35	NaN	NaN	NaN	NaN	NaN	NaN	NaN	NaN	NaN	NaN	NaN	NaN	NaN	NaN	NaN	NaN	NaN	NaN	NaN	NaN	NaN	NaN	NaN
7.75	117.8	0.3	0.29	0	0	80	80	7.4	37	1.49	21	3.74	4	5.35	NaN	NaN	NaN	NaN	NaN	NaN	NaN	NaN	NaN	NaN	NaN	NaN	NaN	NaN	NaN	NaN	NaN	NaN	NaN	NaN	NaN	NaN	NaN
8	117.3	0.3	0.29	0.01	0	80	80	7.42	37	2.34	21	3.74	4	5.35	NaN	NaN	NaN	NaN	NaN	NaN	NaN	NaN	NaN	NaN	NaN	NaN	NaN	NaN	NaN	NaN	NaN	NaN	NaN	NaN	NaN	NaN	NaN
8.25	116.7	0.3	0.29	0.01	0	80	80	7.44	37	3.32	21	3.74	4	5.35	NaN	NaN	NaN	NaN	NaN	NaN	NaN	NaN	NaN	NaN	NaN	NaN	NaN	NaN	NaN	NaN	NaN	NaN	NaN	NaN	NaN	NaN	NaN
8.5	117.6	0.3	0.28	0.01	0	80	80	7.44	37	3.95	21	3.74	4	5.35	NaN	NaN	NaN	NaN	NaN	NaN	NaN	NaN	NaN	NaN	NaN	NaN	NaN	NaN	NaN	NaN	NaN	NaN	NaN	NaN	NaN	NaN	NaN
8.75	117.1	0.3	0.28	0.01	0	80	80	7.46	37	4.95	21	3.74	4	5.35	NaN	NaN	NaN	NaN	NaN	NaN	NaN	NaN	NaN	NaN	NaN	NaN	NaN	NaN	NaN	NaN	NaN	NaN	NaN	NaN	NaN	NaN	NaN
9	117.5	0.3	0.28	0.02	0	80	80	7.45	37	5.54	21	3.74	4	5.35	NaN	NaN	NaN	NaN	NaN	NaN	NaN	NaN	NaN	NaN	NaN	NaN	NaN	NaN	NaN	NaN	NaN	NaN	NaN	NaN	NaN	NaN	NaN
9.25	117.2	0.3	0.28	0.02	0	80	80	7.45	37	6.13	21	3.74	4	5.35	NaN	NaN	NaN	NaN	NaN	NaN	NaN	NaN	NaN	NaN	NaN	NaN	NaN	NaN	NaN	NaN	NaN	NaN	NaN	NaN	NaN	NaN	NaN
9.5	117.5	0.3	0.28	0.02	0.01	80	80	7.45	37	6.92	21	3.74	4	5.35	NaN	NaN	NaN	NaN	NaN	NaN	NaN	NaN	NaN	NaN	NaN	NaN	NaN	NaN	NaN	NaN	NaN	NaN	NaN	NaN	NaN	NaN	NaN
9.75	117.4	0.3	0.27	0.02	0.01	80	80	7.45	37	7.36	21	3.74	4	5.35	NaN	NaN	NaN	NaN	NaN	NaN	NaN	NaN	NaN	NaN	NaN	NaN	NaN	NaN	NaN	NaN	NaN	NaN	NaN	NaN	NaN	NaN	NaN
10	117	0.3	0.27	0.02	0.01	80	80	7.44	37	7.72	21	3.74	4	5.35	NaN	NaN	NaN	NaN	NaN	NaN	NaN	NaN	NaN	NaN	NaN	NaN	NaN	NaN	NaN	NaN	NaN	NaN	NaN	NaN	NaN	NaN	NaN
10.25	116.7	0.3	0.27	0.02	0.01	80	80	7.43	37	8.07	21	3.74	4	5.35	NaN	NaN	NaN	NaN	NaN	NaN	NaN	NaN	NaN	NaN	NaN	NaN	NaN	NaN	NaN	NaN	NaN	NaN	NaN	NaN	NaN	NaN	NaN
10.5	116.9	0.3	0.27	0.02	0.01	80	80	7.42	37	8.26	21	3.74	4	5.35	NaN	NaN	NaN	NaN	NaN	NaN	NaN	NaN	NaN	NaN	NaN	NaN	NaN	NaN	NaN	NaN	NaN	NaN	NaN	NaN	NaN	NaN	NaN
10.75	117.7	0.3	0.27	0.03	0.01	80	80	7.42	37	8.48	21	3.74	4	5.35	NaN	NaN	NaN	NaN	NaN	NaN	NaN	NaN	NaN	NaN	NaN	NaN	NaN	NaN	NaN	NaN	NaN	NaN	NaN	NaN	NaN	NaN	NaN
11	118.8	0.3	0.27	0.03	0.01	80	80	7.4	37	8.51	21	3.74	4	5.35	NaN	NaN	NaN	NaN	NaN	NaN	NaN	NaN	NaN	NaN	NaN	NaN	NaN	NaN	NaN	NaN	NaN	NaN	NaN	NaN	NaN	NaN	NaN
11.25	118	0.3	0.27	0.03	0.01	80	80	7.39	37	8.43	21	3.74	4	5.35	NaN	NaN	NaN	NaN	NaN	NaN	NaN	NaN	NaN	NaN	NaN	NaN	NaN	NaN	NaN	NaN	NaN	NaN	NaN	NaN	NaN	NaN	NaN
11.5	118	0.3	0.27	0.02	0.01	80	80	7.37	37	8.32	21	3.74	4	5.35	NaN	NaN	NaN	NaN	NaN	NaN	NaN	NaN	NaN	NaN	NaN	NaN	NaN	NaN	NaN	NaN	NaN	NaN	NaN	NaN	NaN	NaN	NaN
11.75	117.9	0.3	0.27	0.02	0.01	80	80	7.37	37	8.25	21	3.74	4	5.35	NaN	NaN	NaN	NaN	NaN	NaN	NaN	NaN	NaN	NaN	NaN	NaN	NaN	NaN	NaN	NaN	NaN	NaN	NaN	NaN	NaN	NaN	NaN
12	120.1	0.3	0.27	0.02	0.01	80	80	7.36	37	8.02	21	3.74	4	5.35	NaN	NaN	NaN	NaN	NaN	NaN	NaN	NaN	NaN	NaN	NaN	NaN	NaN	NaN	NaN	NaN	NaN	NaN	NaN	NaN	NaN	NaN	NaN
12.25	120.2	0.3	0.3	0	0	80	80	7.35	37	0.04	21	3.74	4	5.35	NaN	NaN	NaN	NaN	NaN	NaN	NaN	NaN	NaN	NaN	NaN	NaN	NaN	NaN	NaN	NaN	NaN	NaN	NaN	NaN	NaN	NaN	NaN
12.5	119.2	0.3	0.3	0	0	80	80	7.36	37	0.22	21	3.74	4	5.35	NaN	NaN	NaN	NaN	NaN	NaN	NaN	NaN	NaN	NaN	NaN	NaN	NaN	NaN	NaN	NaN	NaN	NaN	NaN	NaN	NaN	NaN	NaN
12.75	118.5	0.3	0.3	0	0	80	80	7.37	37	0.63	21	3.74	4	5.35	NaN	NaN	NaN	NaN	NaN	NaN	NaN	NaN	NaN	NaN	NaN	NaN	NaN	NaN	NaN	NaN	NaN	NaN	NaN	NaN	NaN	NaN	NaN
13	117.6	0.3	0.29	0	0	80	80	7.38	37	1.11	21	3.74	4	5.35	NaN	NaN	NaN	NaN	NaN	NaN	NaN	NaN	NaN	NaN	NaN	NaN	NaN	NaN	NaN	NaN	NaN	NaN	NaN	NaN	NaN	NaN	NaN
13.25	117.1	0.3	0.29	0.01	0	80	80	7.4	37	1.84	21	3.74	4	5.35	NaN	NaN	NaN	NaN	NaN	NaN	NaN	NaN	NaN	NaN	NaN	NaN	NaN	NaN	NaN	NaN	NaN	NaN	NaN	NaN	NaN	NaN	NaN
13.5	116.6	0.3	0.29	0.01	0	80	80	7.41	37	2.48	21	3.74	4	5.35	NaN	NaN	NaN	NaN	NaN	NaN	NaN	NaN	NaN	NaN	NaN	NaN	NaN	NaN	NaN	NaN	NaN	NaN	NaN	NaN	NaN	NaN	NaN
13.75	116.1	0.3	0.29	0.01	0	80	80	7.43	37	3.28	21	3.74	4	5.35	NaN	NaN	NaN	NaN	NaN	NaN	NaN	NaN	NaN	NaN	NaN	NaN	NaN	NaN	NaN	NaN	NaN	NaN	NaN	NaN	NaN	NaN	NaN
14	115.6	0.3	0.28	0.01	0	80	80	7.44	37	4.05	21	3.74	4	5.35	NaN	NaN	NaN	NaN	NaN	NaN	NaN	NaN	NaN	NaN	NaN	NaN	NaN	NaN	NaN	NaN	NaN	NaN	NaN	NaN	NaN	NaN	NaN
14.25	114.8	0.3	0.28	0.01	0	80	80	7.44	37	4.67	21	3.74	4	5.35	NaN	NaN	NaN	NaN	NaN	NaN	NaN	NaN	NaN	NaN	NaN	NaN	NaN	NaN	NaN	NaN	NaN	NaN	NaN	NaN	NaN	NaN	NaN
14.5	114	0.3	0.28	0.02	0	80	80	7.44	37	5.21	21	3.74	4	5.35	NaN	NaN	NaN	NaN	NaN	NaN	NaN	NaN	NaN	NaN	NaN	NaN	NaN	NaN	NaN	NaN	NaN	NaN	NaN	NaN	NaN	NaN	NaN
14.75	115.3	0.3	0.28	0.02	0	80	80	7.44	37	5.97	21	3.74	4	5.35	NaN	NaN	NaN	NaN	NaN	NaN	NaN	NaN	NaN	NaN	NaN	NaN	NaN	NaN	NaN	NaN	NaN	NaN	NaN	NaN	NaN	NaN	NaN
15	116.6	0.3	0.27	0.02	0.01	80	80	7.44	37	6.43	21	3.74	4	5.35	NaN	NaN	NaN	NaN	NaN	NaN	NaN	NaN	NaN	NaN	NaN	NaN	NaN	NaN	NaN	NaN	NaN	NaN	NaN	NaN	NaN	NaN	NaN
15.25	116.5	0.3	0.27	0.02	0.01	80	80	7.44	37	6.98	21	3.74	4	5.35	NaN	NaN	NaN	NaN	NaN	NaN	NaN	NaN	NaN	NaN	NaN	NaN	NaN	NaN	NaN	NaN	NaN	NaN	NaN	NaN	NaN	NaN	NaN
15.5	115.4	0.29	0.26	0.02	0.01	80	80	7.43	37	7.29	21	3.74	4	5.35	NaN	NaN	NaN	NaN	NaN	NaN	NaN	NaN	NaN	NaN	NaN	NaN	NaN	NaN	NaN	NaN	NaN	NaN	NaN	NaN	NaN	NaN	NaN
15.75	115.5	0.3	0.27	0.02	0.01	80	80	7.43	37	7.6	21	3.74	4	5.35	NaN	NaN	NaN	NaN	NaN	NaN	NaN	NaN	NaN	NaN	NaN	NaN	NaN	NaN	NaN	NaN	NaN	NaN	NaN	NaN	NaN	NaN	NaN
16	116	0.3	0.27	0.02	0.01	80	80	7.41	37	7.73	21	3.74	4	5.35	NaN	NaN	NaN	NaN	NaN	NaN	NaN	NaN	NaN	NaN	NaN	NaN	NaN	NaN	NaN	NaN	NaN	NaN	NaN	NaN	NaN	NaN	NaN
16.25	116.6	0.3	0.27	0.02	0.01	80	80	7.4	37	7.8	21	3.74	4	5.35	NaN	NaN	NaN	NaN	NaN	NaN	NaN	NaN	NaN	NaN	NaN	NaN	NaN	NaN	NaN	NaN	NaN	NaN	NaN	NaN	NaN	NaN	NaN
16.5	117.1	0.3	0.27	0.02	0.01	80	80	7.39	37	7.8	21	3.74	4	5.35	NaN	NaN	NaN	NaN	NaN	NaN	NaN	NaN	NaN	NaN	NaN	NaN	NaN	NaN	NaN	NaN	NaN	NaN	NaN	NaN	NaN	NaN	NaN
16.75	117.4	0.3	0.27	0.02	0.01	80	80	7.38	37	7.78	21	3.74	4	5.35	NaN	NaN	NaN	NaN	NaN	NaN	NaN	NaN	NaN	NaN	NaN	NaN	NaN	NaN	NaN	NaN	NaN	NaN	NaN	NaN	NaN	NaN	NaN
17	117.7	0.3	0.27	0.02	0.01	80	80	7.38	37	7.8	21	3.74	4	5.35	NaN	NaN	NaN	NaN	NaN	NaN	NaN	NaN	NaN	NaN	NaN	NaN	NaN	NaN	NaN	NaN	NaN	NaN	NaN	NaN	NaN	NaN	NaN
17.25	117.7	0.3	0.27	0.02	0.01	80	80	7.37	37	7.71	21	3.74	4	5.35	NaN	NaN	NaN	NaN	NaN	NaN	NaN	NaN	NaN	NaN	NaN	NaN	NaN	NaN	NaN	NaN	NaN	NaN	NaN	NaN	NaN	NaN	NaN
17.5	117.4	0.3	0.27	0.02	0.01	80	80	7.36	37	7.56	21	3.74	4	5.35	NaN	NaN	NaN	NaN	NaN	NaN	NaN	NaN	NaN	NaN	NaN	NaN	NaN	NaN	NaN	NaN	NaN	NaN	NaN	NaN	NaN	NaN	NaN
17.75	118	0.3	0.3	0	0	80	80	7.35	37	0.04	21	3.74	4	5.35	NaN	NaN	NaN	NaN	NaN	NaN	NaN	NaN	NaN	NaN	NaN	NaN	NaN	NaN	NaN	NaN	NaN	NaN	NaN	NaN	NaN	NaN	NaN
18	117.1	0.3	0.3	0	0	80	80	7.36	37	0.22	21	3.74	4	5.35	NaN	NaN	NaN	NaN	NaN	NaN	NaN	NaN	NaN	NaN	NaN	NaN	NaN	NaN	NaN	NaN	NaN	NaN	NaN	NaN	NaN	NaN	NaN
18.25	116.3	0.3	0.3	0	0	80	80	7.37	37	0.62	21	3.74	4	5.35	NaN	NaN	NaN	NaN	NaN	NaN	NaN	NaN	NaN	NaN	NaN	NaN	NaN	NaN	NaN	NaN	NaN	NaN	NaN	NaN	NaN	NaN	NaN
18.5	115.9	0.3	0.29	0	0	80	80	7.39	37	1.23	21	3.74	4	5.35	NaN	NaN	NaN	NaN	NaN	NaN	NaN	NaN	NaN	NaN	NaN	NaN	NaN	NaN	NaN	NaN	NaN	NaN	NaN	NaN	NaN	NaN	NaN
18.75	115.5	0.3	0.29	0.01	0	80	80	7.4	37	1.95	21	3.74	4	5.35	NaN	NaN	NaN	NaN	NaN	NaN	NaN	NaN	NaN	NaN	NaN	NaN	NaN	NaN	NaN	NaN	NaN	NaN	NaN	NaN	NaN	NaN	NaN
19	115.6	0.3	0.29	0.01	0	80	80	7.42	37	2.58	21	3.74	4	5.35	NaN	NaN	NaN	NaN	NaN	NaN	NaN	NaN	NaN	NaN	NaN	NaN	NaN	NaN	NaN	NaN	NaN	NaN	NaN	NaN	NaN	NaN	NaN
19.25	115.5	0.3	0.29	0.01	0	80	80	7.43	37	3.35	21	3.74	4	5.35	NaN	NaN	NaN	NaN	NaN	NaN	NaN	NaN	NaN	NaN	NaN	NaN	NaN	NaN	NaN	NaN	NaN	NaN	NaN	NaN	NaN	NaN	NaN
19.5	114.7	0.3	0.28	0.01	0	80	80	7.43	37	3.96	21	3.74	4	5.35	NaN	NaN	NaN	NaN	NaN	NaN	NaN	NaN	NaN	NaN	NaN	NaN	NaN	NaN	NaN	NaN	NaN	NaN	NaN	NaN	NaN	NaN	NaN
19.75	116.4	0.3	0.28	0.01	0	80	80	7.44	37	4.75	21	3.74	4	5.35	NaN	NaN	NaN	NaN	NaN	NaN	NaN	NaN	NaN	NaN	NaN	NaN	NaN	NaN	NaN	NaN	NaN	NaN	NaN	NaN	NaN	NaN	NaN
20	115.9	0.3	0.28	0.02	0	80	80	7.45	37	5.44	21	3.74	4	5.35	NaN	NaN	NaN	NaN	NaN	NaN	NaN	NaN	NaN	NaN	NaN	NaN	NaN	NaN	NaN	NaN	NaN	NaN	NaN	NaN	NaN	NaN	NaN
20.25	115.2	0.3	0.27	0.02	0	80	80	7.44	37	6.01	21	3.74	4	5.35	NaN	NaN	NaN	NaN	NaN	NaN	NaN	NaN	NaN	NaN	NaN	NaN	NaN	NaN	NaN	NaN	NaN	NaN	NaN	NaN	NaN	NaN	NaN
20.5	115.2	0.3	0.27	0.02	0.01	80	80	7.44	37	6.41	21	3.74	4	5.35	NaN	NaN	NaN	NaN	NaN	NaN	NaN	NaN	NaN	NaN	NaN	NaN	NaN	NaN	NaN	NaN	NaN	NaN	NaN	NaN	NaN	NaN	NaN
20.75	114.9	0.3	0.27	0.02	0.01	80	80	7.43	37	6.83	21	3.74	4	5.35	NaN	NaN	NaN	NaN	NaN	NaN	NaN	NaN	NaN	NaN	NaN	NaN	NaN	NaN	NaN	NaN	NaN	NaN	NaN	NaN	NaN	NaN	NaN
21	115.2	0.3	0.28	0.02	0.01	80	80	7.43	37	7.31	21	3.74	4	5.35	690	3.12	2.1528	0	2	3	0.196367	0.00935082	NaN	82500	2.38021e-06	0.196367	161	0.58	6.496	-0.0599425	-350.539	-0.00197852	NaN	NaN	NaN	NaN	NaN
21.25	115.7	0.3	0.27	0.02	0.01	80	80	7.42	37	7.51	21	3.74	4	5.35	NaN	NaN	NaN	NaN	NaN	NaN	NaN	NaN	NaN	NaN	NaN	NaN	NaN	NaN	NaN	NaN	NaN	NaN	NaN	NaN	NaN	NaN	NaN
21.5	116.3	0.3	0.27	0.02	0.01	80	80	7.41	37	7.69	21	3.74	4	5.35	NaN	NaN	NaN	NaN	NaN	NaN	NaN	NaN	NaN	NaN	NaN	NaN	NaN	NaN	NaN	NaN	NaN	NaN	NaN	NaN	NaN	NaN	NaN
21.75	116.7	0.3	0.27	0.02	0.01	80	80	7.4	37	7.73	21	3.74	4	5.35	NaN	NaN	NaN	NaN	NaN	NaN	NaN	NaN	NaN	NaN	NaN	NaN	NaN	NaN	NaN	NaN	NaN	NaN	NaN	NaN	NaN	NaN	NaN
22	116.6	0.3	0.27	0.02	0.01	80	80	7.39	37	7.76	21	3.74	4	5.35	NaN	NaN	NaN	NaN	NaN	NaN	NaN	NaN	NaN	NaN	NaN	NaN	NaN	NaN	NaN	NaN	NaN	NaN	NaN	NaN	NaN	NaN	NaN
22.25	117	0.3	0.27	0.02	0.01	80	80	7.38	37	7.7	21	3.74	4	5.35	NaN	NaN	NaN	NaN	NaN	NaN	NaN	NaN	NaN	NaN	NaN	NaN	NaN	NaN	NaN	NaN	NaN	NaN	NaN	NaN	NaN	NaN	NaN
22.5	116.5	0.3	0.27	0.02	0.01	80	80	7.37	37	7.66	21	3.74	4	5.35	NaN	NaN	NaN	NaN	NaN	NaN	NaN	NaN	NaN	NaN	NaN	NaN	NaN	NaN	NaN	NaN	NaN	NaN	NaN	NaN	NaN	NaN	NaN
22.75	119.6	0.3	0.27	0.02	0.01	80	80	7.37	37	7.69	21	3.74	4	5.35	NaN	NaN	NaN	NaN	NaN	NaN	NaN	NaN	NaN	NaN	NaN	NaN	NaN	NaN	NaN	NaN	NaN	NaN	NaN	NaN	NaN	NaN	NaN
23	118	0.29	0.26	0.02	0.01	80	80	7.36	37	7.53	21	3.74	4	5.35	NaN	NaN	NaN	NaN	NaN	NaN	NaN	NaN	NaN	NaN	NaN	NaN	NaN	NaN	NaN	NaN	NaN	NaN	NaN	NaN	NaN	NaN	NaN
23.25	116.5	0.3	0.28	0.01	0	80	80	7.35	37	0.04	21	3.74	4	5.35	NaN	NaN	NaN	NaN	NaN	NaN	NaN	NaN	NaN	NaN	NaN	NaN	NaN	NaN	NaN	NaN	NaN	NaN	NaN	NaN	NaN	NaN	NaN
23.5	115.5	0.3	0.3	0	0	80	80	7.35	37	0.04	21	3.74	4	5.35	NaN	NaN	NaN	NaN	NaN	NaN	NaN	NaN	NaN	NaN	NaN	NaN	NaN	NaN	NaN	NaN	NaN	NaN	NaN	NaN	NaN	NaN	NaN
23.75	114.5	0.3	0.3	0	0	80	80	7.36	37	0.21	21	3.74	4	5.35	NaN	NaN	NaN	NaN	NaN	NaN	NaN	NaN	NaN	NaN	NaN	NaN	NaN	NaN	NaN	NaN	NaN	NaN	NaN	NaN	NaN	NaN	NaN
24	114.3	0.3	0.3	0	0	80	80	7.37	37	0.68	21	3.74	4	5.35	NaN	NaN	NaN	NaN	NaN	NaN	NaN	NaN	NaN	NaN	NaN	NaN	NaN	NaN	NaN	NaN	NaN	NaN	NaN	NaN	NaN	NaN	NaN
24.25	113.8	0.3	0.29	0	0	70	70	7.39	37	1.33	21	3.74	4	5.35	NaN	NaN	NaN	NaN	NaN	NaN	NaN	NaN	NaN	NaN	NaN	NaN	NaN	NaN	NaN	NaN	NaN	NaN	NaN	NaN	NaN	NaN	NaN
24.5	115.7	0.3	0.29	0.01	0	70	70	7.41	37	2.09	21	3.74	4	5.35	NaN	NaN	NaN	NaN	NaN	NaN	NaN	NaN	NaN	NaN	NaN	NaN	NaN	NaN	NaN	NaN	NaN	NaN	NaN	NaN	NaN	NaN	NaN
24.75	116.2	0.3	0.29	0.01	0	70	70	7.43	37	3.02	21	3.74	4	5.35	NaN	NaN	NaN	NaN	NaN	NaN	NaN	NaN	NaN	NaN	NaN	NaN	NaN	NaN	NaN	NaN	NaN	NaN	NaN	NaN	NaN	NaN	NaN
25	115.3	0.3	0.28	0.01	0	70	70	7.44	37	3.75	21	3.74	4	5.35	NaN	NaN	NaN	NaN	NaN	NaN	NaN	NaN	NaN	NaN	NaN	NaN	NaN	NaN	NaN	NaN	NaN	NaN	NaN	NaN	NaN	NaN	NaN
25.25	114.5	0.3	0.28	0.01	0	70	70	7.44	37	4.42	21	3.74	4	5.35	NaN	NaN	NaN	NaN	NaN	NaN	NaN	NaN	NaN	NaN	NaN	NaN	NaN	NaN	NaN	NaN	NaN	NaN	NaN	NaN	NaN	NaN	NaN
25.5	113.9	0.3	0.28	0.02	0	70	70	7.44	37	5.03	21	3.74	4	5.35	NaN	NaN	NaN	NaN	NaN	NaN	NaN	NaN	NaN	NaN	NaN	NaN	NaN	NaN	NaN	NaN	NaN	NaN	NaN	NaN	NaN	NaN	NaN
25.75	115.8	0.3	0.28	0.02	0	70	70	7.45	37	5.81	21	3.74	4	5.35	NaN	NaN	NaN	NaN	NaN	NaN	NaN	NaN	NaN	NaN	NaN	NaN	NaN	NaN	NaN	NaN	NaN	NaN	NaN	NaN	NaN	NaN	NaN
26	115.6	0.3	0.27	0.02	0	70	70	7.45	37	6.3	21	3.74	4	5.35	NaN	NaN	NaN	NaN	NaN	NaN	NaN	NaN	NaN	NaN	NaN	NaN	NaN	NaN	NaN	NaN	NaN	NaN	NaN	NaN	NaN	NaN	NaN
26.25	114.6	0.3	0.27	0.02	0.01	70	70	7.44	37	6.75	21	3.74	4	5.35	NaN	NaN	NaN	NaN	NaN	NaN	NaN	NaN	NaN	NaN	NaN	NaN	NaN	NaN	NaN	NaN	NaN	NaN	NaN	NaN	NaN	NaN	NaN
26.5	113.6	0.3	0.28	0.02	0.01	70	70	7.43	37	7.12	21	3.74	4	5.35	NaN	NaN	NaN	NaN	NaN	NaN	NaN	NaN	NaN	NaN	NaN	NaN	NaN	NaN	NaN	NaN	NaN	NaN	NaN	NaN	NaN	NaN	NaN
26.75	116.4	0.3	0.27	0.02	0.01	70	70	7.42	37	7.42	21	3.74	4	5.35	NaN	NaN	NaN	NaN	NaN	NaN	NaN	NaN	NaN	NaN	NaN	NaN	NaN	NaN	NaN	NaN	NaN	NaN	NaN	NaN	NaN	NaN	NaN
27	115.5	0.3	0.27	0.02	0.01	70	70	7.41	37	7.55	21	3.74	4	5.35	NaN	NaN	NaN	NaN	NaN	NaN	NaN	NaN	NaN	NaN	NaN	NaN	NaN	NaN	NaN	NaN	NaN	NaN	NaN	NaN	NaN	NaN	NaN
27.25	114.4	0.3	0.27	0.02	0.01	70	70	7.4	37	7.58	21	3.74	4	5.35	NaN	NaN	NaN	NaN	NaN	NaN	NaN	NaN	NaN	NaN	NaN	NaN	NaN	NaN	NaN	NaN	NaN	NaN	NaN	NaN	NaN	NaN	NaN
27.5	113.8	0.3	0.27	0.02	0.01	70	70	7.39	37	7.58	21	3.74	4	5.35	NaN	NaN	NaN	NaN	NaN	NaN	NaN	NaN	NaN	NaN	NaN	NaN	NaN	NaN	NaN	NaN	NaN	NaN	NaN	NaN	NaN	NaN	NaN
27.75	113.7	0.3	0.27	0.02	0.01	70	70	7.37	37	7.42	21	3.74	4	5.35	NaN	NaN	NaN	NaN	NaN	NaN	NaN	NaN	NaN	NaN	NaN	NaN	NaN	NaN	NaN	NaN	NaN	NaN	NaN	NaN	NaN	NaN	NaN
28	113.6	0.3	0.27	0.02	0.01	70	70	7.36	37	7.32	21	3.74	4	5.35	NaN	NaN	NaN	NaN	NaN	NaN	NaN	NaN	NaN	NaN	NaN	NaN	NaN	NaN	NaN	NaN	NaN	NaN	NaN	NaN	NaN	NaN	NaN
28.25	113.9	0.3	0.27	0.02	0.01	70	70	7.36	37	7.24	21	3.74	4	5.35	NaN	NaN	NaN	NaN	NaN	NaN	NaN	NaN	NaN	NaN	NaN	NaN	NaN	NaN	NaN	NaN	NaN	NaN	NaN	NaN	NaN	NaN	NaN
28.5	114.2	0.3	0.28	0.01	0	70	70	7.35	37	7.12	21	3.74	4	5.35	NaN	NaN	NaN	NaN	NaN	NaN	NaN	NaN	NaN	NaN	NaN	NaN	NaN	NaN	NaN	NaN	NaN	NaN	NaN	NaN	NaN	NaN	NaN
28.75	112.9	0.3	0.3	0	0	70	70	7.35	37	0.04	21	3.74	4	5.35	NaN	NaN	NaN	NaN	NaN	NaN	NaN	NaN	NaN	NaN	NaN	NaN	NaN	NaN	NaN	NaN	NaN	NaN	NaN	NaN	NaN	NaN	NaN
29	112.6	0.3	0.3	0	0	70	70	7.36	37	0.14	21	3.74	4	5.35	NaN	NaN	NaN	NaN	NaN	NaN	NaN	NaN	NaN	NaN	NaN	NaN	NaN	NaN	NaN	NaN	NaN	NaN	NaN	NaN	NaN	NaN	NaN
29.25	112.8	0.3	0.3	0	0	70	70	7.37	37	0.55	21	3.74	4	5.35	NaN	NaN	NaN	NaN	NaN	NaN	NaN	NaN	NaN	NaN	NaN	NaN	NaN	NaN	NaN	NaN	NaN	NaN	NaN	NaN	NaN	NaN	NaN
29.5	113.3	0.3	0.29	0	0	70	70	7.39	37	1.12	21	3.74	4	5.35	NaN	NaN	NaN	NaN	NaN	NaN	NaN	NaN	NaN	NaN	NaN	NaN	NaN	NaN	NaN	NaN	NaN	NaN	NaN	NaN	NaN	NaN	NaN
29.75	113.2	0.3	0.29	0.01	0	70	70	7.4	37	1.86	21	3.74	4	5.35	NaN	NaN	NaN	NaN	NaN	NaN	NaN	NaN	NaN	NaN	NaN	NaN	NaN	NaN	NaN	NaN	NaN	NaN	NaN	NaN	NaN	NaN	NaN
30	112.6	0.3	0.29	0.01	0	70	70	7.42	37	2.68	21	3.74	4	5.35	NaN	NaN	NaN	NaN	NaN	NaN	NaN	NaN	NaN	NaN	NaN	NaN	NaN	NaN	NaN	NaN	NaN	NaN	NaN	NaN	NaN	NaN	NaN
30.25	112.1	0.3	0.29	0.01	0	70	70	7.43	37	3.29	21	3.74	4	5.35	NaN	NaN	NaN	NaN	NaN	NaN	NaN	NaN	NaN	NaN	NaN	NaN	NaN	NaN	NaN	NaN	NaN	NaN	NaN	NaN	NaN	NaN	NaN
30.5	113.4	0.3	0.28	0.01	0	70	70	7.44	37	4.07	21	3.74	4	5.35	NaN	NaN	NaN	NaN	NaN	NaN	NaN	NaN	NaN	NaN	NaN	NaN	NaN	NaN	NaN	NaN	NaN	NaN	NaN	NaN	NaN	NaN	NaN
30.75	112.9	0.3	0.28	0.01	0	70	70	7.44	37	4.75	21	3.74	4	5.35	NaN	NaN	NaN	NaN	NaN	NaN	NaN	NaN	NaN	NaN	NaN	NaN	NaN	NaN	NaN	NaN	NaN	NaN	NaN	NaN	NaN	NaN	NaN
31	112.7	0.3	0.28	0.02	0	70	70	7.45	37	5.57	21	3.74	4	5.35	NaN	NaN	NaN	NaN	NaN	NaN	NaN	NaN	NaN	NaN	NaN	NaN	NaN	NaN	NaN	NaN	NaN	NaN	NaN	NaN	NaN	NaN	NaN
31.25	116	0.3	0.28	0.02	0	70	70	7.45	37	6.18	21	3.74	4	5.35	NaN	NaN	NaN	NaN	NaN	NaN	NaN	NaN	NaN	NaN	NaN	NaN	NaN	NaN	NaN	NaN	NaN	NaN	NaN	NaN	NaN	NaN	NaN
31.5	114.9	0.3	0.27	0.02	0.01	70	70	7.44	37	6.59	21	3.74	4	5.35	NaN	NaN	NaN	NaN	NaN	NaN	NaN	NaN	NaN	NaN	NaN	NaN	NaN	NaN	NaN	NaN	NaN	NaN	NaN	NaN	NaN	NaN	NaN
31.75	113.6	0.31	0.27	0.02	0.01	70	70	7.44	37	6.97	21	3.74	4	5.35	NaN	NaN	NaN	NaN	NaN	NaN	NaN	NaN	NaN	NaN	NaN	NaN	NaN	NaN	NaN	NaN	NaN	NaN	NaN	NaN	NaN	NaN	NaN
32	112.6	0.3	0.27	0.02	0.01	70	70	7.43	37	7.21	21	3.74	4	5.35	NaN	NaN	NaN	NaN	NaN	NaN	NaN	NaN	NaN	NaN	NaN	NaN	NaN	NaN	NaN	NaN	NaN	NaN	NaN	NaN	NaN	NaN	NaN
32.25	113.6	0.3	0.27	0.02	0.01	70	70	7.41	37	7.36	21	3.74	4	5.35	NaN	NaN	NaN	NaN	NaN	NaN	NaN	NaN	NaN	NaN	NaN	NaN	NaN	NaN	NaN	NaN	NaN	NaN	NaN	NaN	NaN	NaN	NaN
32.5	115.2	0.3	0.27	0.02	0.01	70	70	7.4	37	7.49	21	3.74	4	5.35	NaN	NaN	NaN	NaN	NaN	NaN	NaN	NaN	NaN	NaN	NaN	NaN	NaN	NaN	NaN	NaN	NaN	NaN	NaN	NaN	NaN	NaN	NaN
32.75	115.5	0.3	0.27	0.02	0.01	70	70	7.39	37	7.5	21	3.74	4	5.35	NaN	NaN	NaN	NaN	NaN	NaN	NaN	NaN	NaN	NaN	NaN	NaN	NaN	NaN	NaN	NaN	NaN	NaN	NaN	NaN	NaN	NaN	NaN
33	113.9	0.3	0.27	0.02	0.01	70	70	7.38	37	7.38	21	3.74	4	5.35	NaN	NaN	NaN	NaN	NaN	NaN	NaN	NaN	NaN	NaN	NaN	NaN	NaN	NaN	NaN	NaN	NaN	NaN	NaN	NaN	NaN	NaN	NaN
33.25	112.9	0.3	0.27	0.02	0.01	70	70	7.37	37	7.21	21	3.74	4	5.35	NaN	NaN	NaN	NaN	NaN	NaN	NaN	NaN	NaN	NaN	NaN	NaN	NaN	NaN	NaN	NaN	NaN	NaN	NaN	NaN	NaN	NaN	NaN
33.5	115.7	0.3	0.27	0.02	0.01	70	70	7.36	37	7.19	21	3.74	4	5.35	NaN	NaN	NaN	NaN	NaN	NaN	NaN	NaN	NaN	NaN	NaN	NaN	NaN	NaN	NaN	NaN	NaN	NaN	NaN	NaN	NaN	NaN	NaN
33.75	114.4	0.3	0.28	0.01	0	70	70	7.35	37	0.04	21	3.74	4	5.35	NaN	NaN	NaN	NaN	NaN	NaN	NaN	NaN	NaN	NaN	NaN	NaN	NaN	NaN	NaN	NaN	NaN	NaN	NaN	NaN	NaN	NaN	NaN
34	113.3	0.3	0.3	0	0	70	70	7.35	37	0.06	21	3.74	4	5.35	NaN	NaN	NaN	NaN	NaN	NaN	NaN	NaN	NaN	NaN	NaN	NaN	NaN	NaN	NaN	NaN	NaN	NaN	NaN	NaN	NaN	NaN	NaN
34.25	112.8	0.3	0.3	0	0	70	70	7.36	37	0.36	21	3.74	4	5.35	NaN	NaN	NaN	NaN	NaN	NaN	NaN	NaN	NaN	NaN	NaN	NaN	NaN	NaN	NaN	NaN	NaN	NaN	NaN	NaN	NaN	NaN	NaN
34.5	112.5	0.3	0.3	0	0	70	70	7.38	37	0.8	21	3.74	4	5.35	NaN	NaN	NaN	NaN	NaN	NaN	NaN	NaN	NaN	NaN	NaN	NaN	NaN	NaN	NaN	NaN	NaN	NaN	NaN	NaN	NaN	NaN	NaN
34.75	112.3	0.3	0.29	0	0	70	70	7.39	37	1.45	21	3.74	4	5.35	NaN	NaN	NaN	NaN	NaN	NaN	NaN	NaN	NaN	NaN	NaN	NaN	NaN	NaN	NaN	NaN	NaN	NaN	NaN	NaN	NaN	NaN	NaN
35	111.6	0.3	0.29	0.01	0	70	70	7.41	37	2.14	21	3.74	4	5.35	NaN	NaN	NaN	NaN	NaN	NaN	NaN	NaN	NaN	NaN	NaN	NaN	NaN	NaN	NaN	NaN	NaN	NaN	NaN	NaN	NaN	NaN	NaN
35.25	111.2	0.3	0.29	0.01	0	70	70	7.41	37	2.6	21	3.74	4	5.35	NaN	NaN	NaN	NaN	NaN	NaN	NaN	NaN	NaN	NaN	NaN	NaN	NaN	NaN	NaN	NaN	NaN	NaN	NaN	NaN	NaN	NaN	NaN
35.5	110.8	0.3	0.29	0.01	0	70	70	7.43	37	3.42	21	3.74	4	5.35	NaN	NaN	NaN	NaN	NaN	NaN	NaN	NaN	NaN	NaN	NaN	NaN	NaN	NaN	NaN	NaN	NaN	NaN	NaN	NaN	NaN	NaN	NaN
35.75	111.2	0.3	0.28	0.01	0	70	70	7.43	37	3.86	21	3.74	4	5.35	NaN	NaN	NaN	NaN	NaN	NaN	NaN	NaN	NaN	NaN	NaN	NaN	NaN	NaN	NaN	NaN	NaN	NaN	NaN	NaN	NaN	NaN	NaN
36	110.9	0.3	0.28	0.01	0	70	70	7.44	37	4.58	21	3.74	4	5.35	NaN	NaN	NaN	NaN	NaN	NaN	NaN	NaN	NaN	NaN	NaN	NaN	NaN	NaN	NaN	NaN	NaN	NaN	NaN	NaN	NaN	NaN	NaN
36.25	111.2	0.3	0.28	0.02	0	70	70	7.43	37	5.02	21	3.74	4	5.35	NaN	NaN	NaN	NaN	NaN	NaN	NaN	NaN	NaN	NaN	NaN	NaN	NaN	NaN	NaN	NaN	NaN	NaN	NaN	NaN	NaN	NaN	NaN
36.5	111	0.28	0.26	0.02	0	70	70	7.44	37	5.74	21	3.74	4	5.35	NaN	NaN	NaN	NaN	NaN	NaN	NaN	NaN	NaN	NaN	NaN	NaN	NaN	NaN	NaN	NaN	NaN	NaN	NaN	NaN	NaN	NaN	NaN
36.75	111.7	0.3	0.28	0.02	0	70	70	7.43	37	6.03	21	3.74	4	5.35	NaN	NaN	NaN	NaN	NaN	NaN	NaN	NaN	NaN	NaN	NaN	NaN	NaN	NaN	NaN	NaN	NaN	NaN	NaN	NaN	NaN	NaN	NaN
37	112.2	0.3	0.27	0.02	0.01	70	70	7.42	37	6.27	21	3.74	4	5.35	NaN	NaN	NaN	NaN	NaN	NaN	NaN	NaN	NaN	NaN	NaN	NaN	NaN	NaN	NaN	NaN	NaN	NaN	NaN	NaN	NaN	NaN	NaN
37.25	111.9	0.3	0.27	0.02	0.01	70	70	7.42	37	6.67	21	3.74	4	5.35	NaN	NaN	NaN	NaN	NaN	NaN	NaN	NaN	NaN	NaN	NaN	NaN	NaN	NaN	NaN	NaN	NaN	NaN	NaN	NaN	NaN	NaN	NaN
37.5	112	0.3	0.27	0.02	0.01	70	70	7.41	37	6.91	21	3.74	4	5.35	NaN	NaN	NaN	NaN	NaN	NaN	NaN	NaN	NaN	NaN	NaN	NaN	NaN	NaN	NaN	NaN	NaN	NaN	NaN	NaN	NaN	NaN	NaN
37.75	112.4	0.3	0.27	0.02	0.01	70	70	7.4	37	7.06	21	3.74	4	5.35	NaN	NaN	NaN	NaN	NaN	NaN	NaN	NaN	NaN	NaN	NaN	NaN	NaN	NaN	NaN	NaN	NaN	NaN	NaN	NaN	NaN	NaN	NaN
38	112.4	0.3	0.27	0.02	0.01	70	70	7.39	37	7.06	21	3.74	4	5.35	NaN	NaN	NaN	NaN	NaN	NaN	NaN	NaN	NaN	NaN	NaN	NaN	NaN	NaN	NaN	NaN	NaN	NaN	NaN	NaN	NaN	NaN	NaN
38.25	112.7	0.3	0.27	0.02	0.01	70	70	7.38	37	7	21	3.74	4	5.35	NaN	NaN	NaN	NaN	NaN	NaN	NaN	NaN	NaN	NaN	NaN	NaN	NaN	NaN	NaN	NaN	NaN	NaN	NaN	NaN	NaN	NaN	NaN
38.5	112.4	0.3	0.27	0.02	0.01	70	70	7.37	37	6.92	21	3.74	4	5.35	NaN	NaN	NaN	NaN	NaN	NaN	NaN	NaN	NaN	NaN	NaN	NaN	NaN	NaN	NaN	NaN	NaN	NaN	NaN	NaN	NaN	NaN	NaN
38.75	112	0.3	0.27	0.02	0.01	70	70	7.36	37	6.86	21	3.74	4	5.35	NaN	NaN	NaN	NaN	NaN	NaN	NaN	NaN	NaN	NaN	NaN	NaN	NaN	NaN	NaN	NaN	NaN	NaN	NaN	NaN	NaN	NaN	NaN
39	112.4	0.3	0.27	0.02	0.01	70	70	7.36	37	6.79	21	3.74	4	5.35	NaN	NaN	NaN	NaN	NaN	NaN	NaN	NaN	NaN	NaN	NaN	NaN	NaN	NaN	NaN	NaN	NaN	NaN	NaN	NaN	NaN	NaN	NaN
39.25	112.4	0.3	0.3	0	0	70	70	7.35	37	0.04	21	3.74	4	5.35	NaN	NaN	NaN	NaN	NaN	NaN	NaN	NaN	NaN	NaN	NaN	NaN	NaN	NaN	NaN	NaN	NaN	NaN	NaN	NaN	NaN	NaN	NaN
39.5	111.8	0.3	0.3	0	0	70	70	7.36	37	0.18	21	3.74	4	5.35	NaN	NaN	NaN	NaN	NaN	NaN	NaN	NaN	NaN	NaN	NaN	NaN	NaN	NaN	NaN	NaN	NaN	NaN	NaN	NaN	NaN	NaN	NaN
39.75	111.1	0.3	0.3	0	0	70	70	7.37	37	0.51	21	3.74	4	5.35	NaN	NaN	NaN	NaN	NaN	NaN	NaN	NaN	NaN	NaN	NaN	NaN	NaN	NaN	NaN	NaN	NaN	NaN	NaN	NaN	NaN	NaN	NaN
40	110.7	0.3	0.29	0	0	70	70	7.38	37	1.04	21	3.74	4	5.35	NaN	NaN	NaN	NaN	NaN	NaN	NaN	NaN	NaN	NaN	NaN	NaN	NaN	NaN	NaN	NaN	NaN	NaN	NaN	NaN	NaN	NaN	NaN
40.25	110.5	0.3	0.29	0.01	0	70	70	7.4	37	1.72	21	3.74	4	5.35	NaN	NaN	NaN	NaN	NaN	NaN	NaN	NaN	NaN	NaN	NaN	NaN	NaN	NaN	NaN	NaN	NaN	NaN	NaN	NaN	NaN	NaN	NaN
40.5	110.1	0.3	0.29	0.01	0	70	70	7.42	37	2.54	21	3.74	4	5.35	NaN	NaN	NaN	NaN	NaN	NaN	NaN	NaN	NaN	NaN	NaN	NaN	NaN	NaN	NaN	NaN	NaN	NaN	NaN	NaN	NaN	NaN	NaN
40.75	109.9	0.3	0.29	0.01	0	70	70	7.42	37	3.09	21	3.74	4	5.35	NaN	NaN	NaN	NaN	NaN	NaN	NaN	NaN	NaN	NaN	NaN	NaN	NaN	NaN	NaN	NaN	NaN	NaN	NaN	NaN	NaN	NaN	NaN
41	110.5	0.3	0.28	0.01	0	70	70	7.43	37	3.79	21	3.74	4	5.35	NaN	NaN	NaN	NaN	NaN	NaN	NaN	NaN	NaN	NaN	NaN	NaN	NaN	NaN	NaN	NaN	NaN	NaN	NaN	NaN	NaN	NaN	NaN
41.25	110.2	0.3	0.28	0.01	0	70	70	7.44	37	4.64	21	3.74	4	5.35	NaN	NaN	NaN	NaN	NaN	NaN	NaN	NaN	NaN	NaN	NaN	NaN	NaN	NaN	NaN	NaN	NaN	NaN	NaN	NaN	NaN	NaN	NaN
41.5	110.7	0.3	0.28	0.01	0	70	70	7.44	37	5.02	21	3.74	4	5.35	NaN	NaN	NaN	NaN	NaN	NaN	NaN	NaN	NaN	NaN	NaN	NaN	NaN	NaN	NaN	NaN	NaN	NaN	NaN	NaN	NaN	NaN	NaN
41.75	110.3	0.3	0.28	0.02	0	70	70	7.43	37	5.46	21	3.74	4	5.35	NaN	NaN	NaN	NaN	NaN	NaN	NaN	NaN	NaN	NaN	NaN	NaN	NaN	NaN	NaN	NaN	NaN	NaN	NaN	NaN	NaN	NaN	NaN
42	110.7	0.3	0.28	0.02	0	70	70	7.43	37	6.03	21	3.74	4	5.35	NaN	NaN	NaN	NaN	NaN	NaN	NaN	NaN	NaN	NaN	NaN	NaN	NaN	NaN	NaN	NaN	NaN	NaN	NaN	NaN	NaN	NaN	NaN
42.25	111.4	0.3	0.27	0.02	0	70	70	7.43	37	6.27	21	3.74	4	5.35	NaN	NaN	NaN	NaN	NaN	NaN	NaN	NaN	NaN	NaN	NaN	NaN	NaN	NaN	NaN	NaN	NaN	NaN	NaN	NaN	NaN	NaN	NaN
42.5	110.7	0.3	0.27	0.02	0.01	70	70	7.42	37	6.46	21	3.74	4	5.35	NaN	NaN	NaN	NaN	NaN	NaN	NaN	NaN	NaN	NaN	NaN	NaN	NaN	NaN	NaN	NaN	NaN	NaN	NaN	NaN	NaN	NaN	NaN
42.75	111.2	0.3	0.27	0.02	0.01	70	70	7.41	37	6.7	21	3.74	4	5.35	NaN	NaN	NaN	NaN	NaN	NaN	NaN	NaN	NaN	NaN	NaN	NaN	NaN	NaN	NaN	NaN	NaN	NaN	NaN	NaN	NaN	NaN	NaN
43	110.8	0.3	0.27	0.02	0.01	70	70	7.4	37	6.72	21	3.74	4	5.35	NaN	NaN	NaN	NaN	NaN	NaN	NaN	NaN	NaN	NaN	NaN	NaN	NaN	NaN	NaN	NaN	NaN	NaN	NaN	NaN	NaN	NaN	NaN
43.25	110.4	0.3	0.27	0.02	0.01	70	70	7.39	37	6.78	21	3.74	4	5.35	NaN	NaN	NaN	NaN	NaN	NaN	NaN	NaN	NaN	NaN	NaN	NaN	NaN	NaN	NaN	NaN	NaN	NaN	NaN	NaN	NaN	NaN	NaN
43.5	110.8	0.3	0.27	0.02	0.01	70	70	7.38	37	6.83	21	3.74	4	5.35	NaN	NaN	NaN	NaN	NaN	NaN	NaN	NaN	NaN	NaN	NaN	NaN	NaN	NaN	NaN	NaN	NaN	NaN	NaN	NaN	NaN	NaN	NaN
43.75	111	0.3	0.27	0.02	0.01	70	70	7.37	37	6.73	21	3.74	4	5.35	NaN	NaN	NaN	NaN	NaN	NaN	NaN	NaN	NaN	NaN	NaN	NaN	NaN	NaN	NaN	NaN	NaN	NaN	NaN	NaN	NaN	NaN	NaN
44	111.3	0.3	0.27	0.02	0.01	70	70	7.36	37	6.54	21	3.74	4	5.35	680	2.45	1.666	NaN	NaN	NaN	0.67	0.0291304	NaN	103750	6.45783e-06	0.866367	172	1.2	13.44	0.270703	162.634	0.00426447	NaN	NaN	NaN	NaN	NaN
44.25	110.7	0.3	0.3	0	0	70	70	7.35	37	0.04	21	3.74	4	5.35	NaN	NaN	NaN	NaN	NaN	NaN	NaN	NaN	NaN	NaN	NaN	NaN	NaN	NaN	NaN	NaN	NaN	NaN	NaN	NaN	NaN	NaN	NaN
44.5	110	0.3	0.3	0	0	70	70	7.35	37	0.09	21	3.74	4	5.35	NaN	NaN	NaN	NaN	NaN	NaN	NaN	NaN	NaN	NaN	NaN	NaN	NaN	NaN	NaN	NaN	NaN	NaN	NaN	NaN	NaN	NaN	NaN
44.75	109.3	0.3	0.3	0	0	70	70	7.36	37	0.36	21	3.74	4	5.35	NaN	NaN	NaN	1.386	2	3.63074	NaN	NaN	NaN	NaN	NaN	NaN	NaN	NaN	NaN	NaN	NaN	NaN	NaN	NaN	NaN	NaN	NaN
45	110.5	0.3	0.3	0	0	70	70	7.38	37	0.83	21	3.74	4	5.35	NaN	NaN	NaN	NaN	NaN	NaN	NaN	NaN	NaN	NaN	NaN	NaN	NaN	NaN	NaN	NaN	NaN	NaN	NaN	NaN	NaN	NaN	NaN
45.25	110.3	0.3	0.29	0	0	70	70	7.39	37	1.43	21	3.74	4	5.35	NaN	NaN	NaN	NaN	NaN	NaN	NaN	NaN	NaN	NaN	NaN	NaN	NaN	NaN	NaN	NaN	NaN	NaN	NaN	NaN	NaN	NaN	NaN
45.5	110.2	0.3	0.29	0.01	0	70	70	7.41	37	2.15	21	3.74	4	5.35	NaN	NaN	NaN	NaN	NaN	NaN	NaN	NaN	NaN	NaN	NaN	NaN	NaN	NaN	NaN	NaN	NaN	NaN	NaN	NaN	NaN	NaN	NaN
45.75	110	0.3	0.29	0.01	0	70	70	7.42	37	2.85	21	3.74	4	5.35	NaN	NaN	NaN	NaN	NaN	NaN	NaN	NaN	NaN	NaN	NaN	NaN	NaN	NaN	NaN	NaN	NaN	NaN	NaN	NaN	NaN	NaN	NaN
46	109.6	0.3	0.29	0.01	0	70	70	7.43	37	3.44	21	3.74	4	5.35	NaN	NaN	NaN	NaN	NaN	NaN	NaN	NaN	NaN	NaN	NaN	NaN	NaN	NaN	NaN	NaN	NaN	NaN	NaN	NaN	NaN	NaN	NaN
46.25	109.4	0.3	0.28	0.01	0	70	70	7.43	37	4.2	21	3.74	4	5.35	NaN	NaN	NaN	NaN	NaN	NaN	NaN	NaN	NaN	NaN	NaN	NaN	NaN	NaN	NaN	NaN	NaN	NaN	NaN	NaN	NaN	NaN	NaN
46.5	111.7	0.3	0.28	0.01	0	70	70	7.44	37	4.78	21	3.74	4	5.35	NaN	NaN	NaN	NaN	NaN	NaN	NaN	NaN	NaN	NaN	NaN	NaN	NaN	NaN	NaN	NaN	NaN	NaN	NaN	NaN	NaN	NaN	NaN
46.75	111.3	0.3	0.28	0.02	0	70	70	7.43	37	5.27	21	3.74	4	5.35	NaN	NaN	NaN	NaN	NaN	NaN	NaN	NaN	NaN	NaN	NaN	NaN	NaN	NaN	NaN	NaN	NaN	NaN	NaN	NaN	NaN	NaN	NaN
47	110.4	0.3	0.28	0.02	0	70	70	7.43	37	5.55	21	3.74	4	5.35	NaN	NaN	NaN	NaN	NaN	NaN	NaN	NaN	NaN	NaN	NaN	NaN	NaN	NaN	NaN	NaN	NaN	NaN	NaN	NaN	NaN	NaN	NaN
47.25	109.3	0.3	0.28	0.02	0	70	70	7.42	37	5.78	21	3.74	4	5.35	NaN	NaN	NaN	NaN	NaN	NaN	NaN	NaN	NaN	NaN	NaN	NaN	NaN	NaN	NaN	NaN	NaN	NaN	NaN	NaN	NaN	NaN	NaN
47.5	108.4	0.3	0.28	0.02	0	70	70	7.41	37	5.87	21	3.74	4	5.35	NaN	NaN	NaN	NaN	NaN	NaN	NaN	NaN	NaN	NaN	NaN	NaN	NaN	NaN	NaN	NaN	NaN	NaN	NaN	NaN	NaN	NaN	NaN
47.75	109.6	0.3	0.27	0.02	0	70	70	7.4	37	6.13	21	3.74	4	5.35	NaN	NaN	NaN	NaN	NaN	NaN	NaN	NaN	NaN	NaN	NaN	NaN	NaN	NaN	NaN	NaN	NaN	NaN	NaN	NaN	NaN	NaN	NaN
48	109	0.3	0.28	0.02	0	70	70	7.39	37	6.23	21	3.74	4	5.35	NaN	NaN	NaN	NaN	NaN	NaN	NaN	NaN	NaN	NaN	NaN	NaN	NaN	NaN	NaN	NaN	NaN	NaN	NaN	NaN	NaN	NaN	NaN
48.25	112.1	0.3	0.27	0.02	0.01	70	70	7.39	37	6.29	21	3.74	4	5.35	NaN	NaN	NaN	NaN	NaN	NaN	NaN	NaN	NaN	NaN	NaN	NaN	NaN	NaN	NaN	NaN	NaN	NaN	NaN	NaN	NaN	NaN	NaN
48.5	111.1	0.3	0.27	0.02	0	70	70	7.38	37	6.22	21	3.74	4	5.35	NaN	NaN	NaN	NaN	NaN	NaN	NaN	NaN	NaN	NaN	NaN	NaN	NaN	NaN	NaN	NaN	NaN	NaN	NaN	NaN	NaN	NaN	NaN
48.75	109.8	0.29	0.26	0.02	0	70	70	7.37	37	6.12	21	3.74	4	5.35	NaN	NaN	NaN	NaN	NaN	NaN	NaN	NaN	NaN	NaN	NaN	NaN	NaN	NaN	NaN	NaN	NaN	NaN	NaN	NaN	NaN	NaN	NaN
49	108.9	0.3	0.28	0.02	0	70	70	7.36	37	5.95	21	3.74	4	5.35	NaN	NaN	NaN	NaN	NaN	NaN	NaN	NaN	NaN	NaN	NaN	NaN	NaN	NaN	NaN	NaN	NaN	NaN	NaN	NaN	NaN	NaN	NaN
49.25	107.3	0.3	0.3	0	0	70	70	7.35	37.1	0.04	21	3.74	4	5.35	NaN	NaN	NaN	NaN	NaN	NaN	NaN	NaN	NaN	NaN	NaN	NaN	NaN	NaN	NaN	NaN	NaN	NaN	NaN	NaN	NaN	NaN	NaN
49.5	106.4	0.3	0.3	0	0	70	70	7.35	37.1	0.04	21	3.74	4	5.35	NaN	NaN	NaN	NaN	NaN	NaN	NaN	NaN	NaN	NaN	NaN	NaN	NaN	NaN	NaN	NaN	NaN	NaN	NaN	NaN	NaN	NaN	NaN
49.75	106.3	0	0	0	0	70	70	7.36	36.9	0	0	3.74	4	5.35	NaN	NaN	NaN	NaN	NaN	NaN	NaN	NaN	NaN	NaN	NaN	NaN	NaN	NaN	NaN	NaN	NaN	NaN	NaN	NaN	NaN	NaN	NaN
50	123.3	0.3	0.28	0.01	0	70	70	7.45	33	3.06	21	3.74	4	5.35	NaN	NaN	NaN	NaN	NaN	NaN	NaN	NaN	NaN	NaN	NaN	NaN	NaN	NaN	NaN	NaN	NaN	NaN	NaN	NaN	NaN	NaN	NaN
50.25	121.9	0.3	0.29	0.01	0	70	70	7.44	37.7	3.3	21	3.74	4	5.35	NaN	NaN	NaN	NaN	NaN	NaN	NaN	NaN	NaN	NaN	NaN	NaN	NaN	NaN	NaN	NaN	NaN	NaN	NaN	NaN	NaN	NaN	NaN
50.5	117.4	0.3	0.28	0.01	0	70	70	7.46	37.4	4.24	21	3.74	4	5.35	NaN	NaN	NaN	NaN	NaN	NaN	NaN	NaN	NaN	NaN	NaN	NaN	NaN	NaN	NaN	NaN	NaN	NaN	NaN	NaN	NaN	NaN	NaN
50.75	114.2	0.3	0.28	0.02	0	70	70	7.47	36.9	5.21	21	3.74	4	5.35	NaN	NaN	NaN	NaN	NaN	NaN	NaN	NaN	NaN	NaN	NaN	NaN	NaN	NaN	NaN	NaN	NaN	NaN	NaN	NaN	NaN	NaN	NaN
51	112.3	0.32	0.28	0.02	0	70	70	7.48	37.1	6.16	21	3.74	4	5.35	NaN	NaN	NaN	NaN	NaN	NaN	NaN	NaN	NaN	NaN	NaN	NaN	NaN	NaN	NaN	NaN	NaN	NaN	NaN	NaN	NaN	NaN	NaN
51.25	111.8	0.3	0.27	0.02	0.01	70	70	7.47	37.2	6.73	21	3.74	4	5.35	NaN	NaN	NaN	NaN	NaN	NaN	NaN	NaN	NaN	NaN	NaN	NaN	NaN	NaN	NaN	NaN	NaN	NaN	NaN	NaN	NaN	NaN	NaN
51.5	111.4	0.3	0.27	0.02	0.01	70	70	7.46	37.2	7.27	21	3.74	4	5.35	NaN	NaN	NaN	NaN	NaN	NaN	NaN	NaN	NaN	NaN	NaN	NaN	NaN	NaN	NaN	NaN	NaN	NaN	NaN	NaN	NaN	NaN	NaN
51.75	110.9	0.3	0.27	0.02	0.01	70	70	7.45	37.1	7.7	21	3.74	4	5.35	NaN	NaN	NaN	NaN	NaN	NaN	NaN	NaN	NaN	NaN	NaN	NaN	NaN	NaN	NaN	NaN	NaN	NaN	NaN	NaN	NaN	NaN	NaN
52	110.5	0.3	0.27	0.02	0.01	70	70	7.44	37.1	8.06	21	3.74	4	5.35	NaN	NaN	NaN	NaN	NaN	NaN	NaN	NaN	NaN	NaN	NaN	NaN	NaN	NaN	NaN	NaN	NaN	NaN	NaN	NaN	NaN	NaN	NaN
52.25	110.4	0.3	0.27	0.02	0.01	70	70	7.43	37.1	8.29	21	3.74	4	5.35	NaN	NaN	NaN	NaN	NaN	NaN	NaN	NaN	NaN	NaN	NaN	NaN	NaN	NaN	NaN	NaN	NaN	NaN	NaN	NaN	NaN	NaN	NaN
52.5	110.1	0.3	0.27	0.03	0.01	70	70	7.42	37.1	8.48	21	3.74	4	5.35	NaN	NaN	NaN	NaN	NaN	NaN	NaN	NaN	NaN	NaN	NaN	NaN	NaN	NaN	NaN	NaN	NaN	NaN	NaN	NaN	NaN	NaN	NaN
52.75	110.3	0.29	0.26	0.03	0.01	70	70	7.4	37.1	8.52	21	3.74	4	5.35	NaN	NaN	NaN	NaN	NaN	NaN	NaN	NaN	NaN	NaN	NaN	NaN	NaN	NaN	NaN	NaN	NaN	NaN	NaN	NaN	NaN	NaN	NaN
53	112.6	0.29	0.26	0.03	0.01	70	70	7.4	37.1	8.59	21	3.74	4	5.35	NaN	NaN	NaN	NaN	NaN	NaN	NaN	NaN	NaN	NaN	NaN	NaN	NaN	NaN	NaN	NaN	NaN	NaN	NaN	NaN	NaN	NaN	NaN
53.25	111.3	0.3	0.27	0.03	0.01	70	70	7.38	37.1	8.43	21	3.74	4	5.35	NaN	NaN	NaN	NaN	NaN	NaN	NaN	NaN	NaN	NaN	NaN	NaN	NaN	NaN	NaN	NaN	NaN	NaN	NaN	NaN	NaN	NaN	NaN
53.5	110.3	0.3	0.27	0.02	0.01	70	70	7.36	37.1	8.15	21	3.74	4	5.35	NaN	NaN	NaN	NaN	NaN	NaN	NaN	NaN	NaN	NaN	NaN	NaN	NaN	NaN	NaN	NaN	NaN	NaN	NaN	NaN	NaN	NaN	NaN
53.75	110.4	0.3	0.29	0.01	0	70	70	7.35	37.1	0.04	21	3.74	4	5.35	NaN	NaN	NaN	NaN	NaN	NaN	NaN	NaN	NaN	NaN	NaN	NaN	NaN	NaN	NaN	NaN	NaN	NaN	NaN	NaN	NaN	NaN	NaN
54	110.1	0.3	0.3	0	0	70	70	7.35	37.1	0.04	21	3.74	4	5.35	NaN	NaN	NaN	NaN	NaN	NaN	NaN	NaN	NaN	NaN	NaN	NaN	NaN	NaN	NaN	NaN	NaN	NaN	NaN	NaN	NaN	NaN	NaN
54.25	108.6	0.3	0.3	0	0	70	70	7.36	37	0.22	21	3.74	4	5.35	NaN	NaN	NaN	NaN	NaN	NaN	NaN	NaN	NaN	NaN	NaN	NaN	NaN	NaN	NaN	NaN	NaN	NaN	NaN	NaN	NaN	NaN	NaN
54.5	108	0.3	0.3	0	0	70	70	7.37	37.1	0.66	21	3.74	4	5.35	NaN	NaN	NaN	NaN	NaN	NaN	NaN	NaN	NaN	NaN	NaN	NaN	NaN	NaN	NaN	NaN	NaN	NaN	NaN	NaN	NaN	NaN	NaN
54.75	107.3	0.3	0.29	0	0	70	70	7.39	37	1.24	21	3.74	4	5.35	NaN	NaN	NaN	NaN	NaN	NaN	NaN	NaN	NaN	NaN	NaN	NaN	NaN	NaN	NaN	NaN	NaN	NaN	NaN	NaN	NaN	NaN	NaN
55	106.8	0.3	0.29	0.01	0	70	70	7.41	37	1.98	21	3.74	4	5.35	NaN	NaN	NaN	NaN	NaN	NaN	NaN	NaN	NaN	NaN	NaN	NaN	NaN	NaN	NaN	NaN	NaN	NaN	NaN	NaN	NaN	NaN	NaN
55.25	106.4	0.3	0.29	0.01	0	70	70	7.43	37	2.85	21	3.74	4	5.35	NaN	NaN	NaN	NaN	NaN	NaN	NaN	NaN	NaN	NaN	NaN	NaN	NaN	NaN	NaN	NaN	NaN	NaN	NaN	NaN	NaN	NaN	NaN
55.5	107	0.3	0.29	0.01	0	70	70	7.43	37	3.38	21	3.74	4	5.35	NaN	NaN	NaN	NaN	NaN	NaN	NaN	NaN	NaN	NaN	NaN	NaN	NaN	NaN	NaN	NaN	NaN	NaN	NaN	NaN	NaN	NaN	NaN
55.75	106.8	0.3	0.28	0.01	0	70	70	7.44	37	4.18	21	3.74	4	5.35	NaN	NaN	NaN	NaN	NaN	NaN	NaN	NaN	NaN	NaN	NaN	NaN	NaN	NaN	NaN	NaN	NaN	NaN	NaN	NaN	NaN	NaN	NaN
56	106.7	0.3	0.28	0.01	0	70	70	7.44	37	4.69	21	3.74	4	5.35	NaN	NaN	NaN	NaN	NaN	NaN	NaN	NaN	NaN	NaN	NaN	NaN	NaN	NaN	NaN	NaN	NaN	NaN	NaN	NaN	NaN	NaN	NaN
56.25	106.7	0.3	0.28	0.02	0	70	70	7.44	37.1	5.44	21	3.74	4	5.35	NaN	NaN	NaN	NaN	NaN	NaN	NaN	NaN	NaN	NaN	NaN	NaN	NaN	NaN	NaN	NaN	NaN	NaN	NaN	NaN	NaN	NaN	NaN
56.5	107	0.3	0.28	0.02	0	70	70	7.44	37	5.86	21	3.74	4	5.35	NaN	NaN	NaN	NaN	NaN	NaN	NaN	NaN	NaN	NaN	NaN	NaN	NaN	NaN	NaN	NaN	NaN	NaN	NaN	NaN	NaN	NaN	NaN
56.75	106.2	0.3	0.27	0.02	0	70	70	7.43	37	6.29	21	3.74	4	5.35	NaN	NaN	NaN	NaN	NaN	NaN	NaN	NaN	NaN	NaN	NaN	NaN	NaN	NaN	NaN	NaN	NaN	NaN	NaN	NaN	NaN	NaN	NaN
57	105.6	0.3	0.27	0.02	0.01	70	70	7.43	37	6.69	21	3.74	4	5.35	NaN	NaN	NaN	NaN	NaN	NaN	NaN	NaN	NaN	NaN	NaN	NaN	NaN	NaN	NaN	NaN	NaN	NaN	NaN	NaN	NaN	NaN	NaN
57.25	105.9	0.3	0.27	0.02	0.01	70	70	7.42	37	6.96	21	3.74	4	5.35	NaN	NaN	NaN	NaN	NaN	NaN	NaN	NaN	NaN	NaN	NaN	NaN	NaN	NaN	NaN	NaN	NaN	NaN	NaN	NaN	NaN	NaN	NaN
57.5	105.9	0.3	0.27	0.02	0.01	70	70	7.41	37	7.09	21	3.74	4	5.35	NaN	NaN	NaN	NaN	NaN	NaN	NaN	NaN	NaN	NaN	NaN	NaN	NaN	NaN	NaN	NaN	NaN	NaN	NaN	NaN	NaN	NaN	NaN
57.75	105.9	0.3	0.27	0.02	0.01	70	70	7.4	37	7.16	21	3.74	4	5.35	NaN	NaN	NaN	NaN	NaN	NaN	NaN	NaN	NaN	NaN	NaN	NaN	NaN	NaN	NaN	NaN	NaN	NaN	NaN	NaN	NaN	NaN	NaN
58	106.2	0.3	0.27	0.02	0.01	70	70	7.39	37	7.2	21	3.74	4	5.35	NaN	NaN	NaN	NaN	NaN	NaN	NaN	NaN	NaN	NaN	NaN	NaN	NaN	NaN	NaN	NaN	NaN	NaN	NaN	NaN	NaN	NaN	NaN
58.25	105.6	0.3	0.27	0.02	0.01	70	70	7.38	37	7.21	21	3.74	4	5.35	NaN	NaN	NaN	NaN	NaN	NaN	NaN	NaN	NaN	NaN	NaN	NaN	NaN	NaN	NaN	NaN	NaN	NaN	NaN	NaN	NaN	NaN	NaN
58.5	105.6	0.3	0.27	0.02	0.01	70	70	7.38	37	7.26	21	3.74	4	5.35	NaN	NaN	NaN	NaN	NaN	NaN	NaN	NaN	NaN	NaN	NaN	NaN	NaN	NaN	NaN	NaN	NaN	NaN	NaN	NaN	NaN	NaN	NaN
58.75	105.7	0.3	0.27	0.02	0.01	70	70	7.37	37	7.15	21	3.74	4	5.35	NaN	NaN	NaN	NaN	NaN	NaN	NaN	NaN	NaN	NaN	NaN	NaN	NaN	NaN	NaN	NaN	NaN	NaN	NaN	NaN	NaN	NaN	NaN
59	105.4	0.3	0.27	0.02	0.01	70	70	7.36	37	6.96	21	3.74	4	5.35	NaN	NaN	NaN	NaN	NaN	NaN	NaN	NaN	NaN	NaN	NaN	NaN	NaN	NaN	NaN	NaN	NaN	NaN	NaN	NaN	NaN	NaN	NaN
59.25	105.6	0.3	0.3	0	0	70	70	7.35	37	0.04	21	3.74	4	5.35	NaN	NaN	NaN	NaN	NaN	NaN	NaN	NaN	NaN	NaN	NaN	NaN	NaN	NaN	NaN	NaN	NaN	NaN	NaN	NaN	NaN	NaN	NaN
59.5	105.2	0.3	0.3	0	0	70	70	7.35	37	0.05	21	3.74	4	5.35	NaN	NaN	NaN	NaN	NaN	NaN	NaN	NaN	NaN	NaN	NaN	NaN	NaN	NaN	NaN	NaN	NaN	NaN	NaN	NaN	NaN	NaN	NaN
59.75	104.9	0.3	0.3	0	0	70	70	7.36	37	0.36	21	3.74	4	5.35	NaN	NaN	NaN	NaN	NaN	NaN	NaN	NaN	NaN	NaN	NaN	NaN	NaN	NaN	NaN	NaN	NaN	NaN	NaN	NaN	NaN	NaN	NaN
60	104.4	0.3	0.29	0	0	70	70	7.38	37	0.84	21	3.74	4	5.35	NaN	NaN	NaN	NaN	NaN	NaN	NaN	NaN	NaN	NaN	NaN	NaN	NaN	NaN	NaN	NaN	NaN	NaN	NaN	NaN	NaN	NaN	NaN
60.25	104.5	0.3	0.29	0	0	70	70	7.39	37	1.49	21	3.74	4	5.35	NaN	NaN	NaN	NaN	NaN	NaN	NaN	NaN	NaN	NaN	NaN	NaN	NaN	NaN	NaN	NaN	NaN	NaN	NaN	NaN	NaN	NaN	NaN
60.5	104.3	0.3	0.29	0.01	0	70	70	7.41	37	2.25	21	3.74	4	5.35	NaN	NaN	NaN	NaN	NaN	NaN	NaN	NaN	NaN	NaN	NaN	NaN	NaN	NaN	NaN	NaN	NaN	NaN	NaN	NaN	NaN	NaN	NaN
60.75	104.1	0.3	0.29	0.01	0	70	70	7.43	37	3.08	21	3.74	4	5.35	NaN	NaN	NaN	NaN	NaN	NaN	NaN	NaN	NaN	NaN	NaN	NaN	NaN	NaN	NaN	NaN	NaN	NaN	NaN	NaN	NaN	NaN	NaN
61	104.8	0.3	0.28	0.01	0	70	70	7.43	37	3.55	21	3.74	4	5.35	NaN	NaN	NaN	NaN	NaN	NaN	NaN	NaN	NaN	NaN	NaN	NaN	NaN	NaN	NaN	NaN	NaN	NaN	NaN	NaN	NaN	NaN	NaN
61.25	104.6	0.3	0.28	0.01	0	70	70	7.44	37	4.29	21	3.74	4	5.35	NaN	NaN	NaN	NaN	NaN	NaN	NaN	NaN	NaN	NaN	NaN	NaN	NaN	NaN	NaN	NaN	NaN	NaN	NaN	NaN	NaN	NaN	NaN
61.5	104.8	0.3	0.28	0.01	0	70	70	7.44	37	4.77	21	3.74	4	5.35	NaN	NaN	NaN	NaN	NaN	NaN	NaN	NaN	NaN	NaN	NaN	NaN	NaN	NaN	NaN	NaN	NaN	NaN	NaN	NaN	NaN	NaN	NaN
61.75	104	0.29	0.27	0.02	0	70	70	7.44	37	5.51	21	3.74	4	5.35	NaN	NaN	NaN	NaN	NaN	NaN	NaN	NaN	NaN	NaN	NaN	NaN	NaN	NaN	NaN	NaN	NaN	NaN	NaN	NaN	NaN	NaN	NaN
62	104.6	0.3	0.28	0.02	0	70	70	7.43	37	5.72	21	3.74	4	5.35	NaN	NaN	NaN	NaN	NaN	NaN	NaN	NaN	NaN	NaN	NaN	NaN	NaN	NaN	NaN	NaN	NaN	NaN	NaN	NaN	NaN	NaN	NaN
62.25	103.6	0.3	0.28	0.02	0	70	70	7.42	37	6	21	3.74	4	5.35	NaN	NaN	NaN	NaN	NaN	NaN	NaN	NaN	NaN	NaN	NaN	NaN	NaN	NaN	NaN	NaN	NaN	NaN	NaN	NaN	NaN	NaN	NaN
62.5	103.7	0.3	0.27	0.02	0.01	70	70	7.42	37	6.32	21	3.74	4	5.35	NaN	NaN	NaN	NaN	NaN	NaN	NaN	NaN	NaN	NaN	NaN	NaN	NaN	NaN	NaN	NaN	NaN	NaN	NaN	NaN	NaN	NaN	NaN
62.75	102.8	0.3	0.27	0.02	0.01	70	70	7.41	37	6.49	21	3.74	4	5.35	NaN	NaN	NaN	NaN	NaN	NaN	NaN	NaN	NaN	NaN	NaN	NaN	NaN	NaN	NaN	NaN	NaN	NaN	NaN	NaN	NaN	NaN	NaN
63	103.3	0.29	0.27	0.02	0.01	70	70	7.4	37	6.7	21	3.74	4	5.35	NaN	NaN	NaN	NaN	NaN	NaN	NaN	NaN	NaN	NaN	NaN	NaN	NaN	NaN	NaN	NaN	NaN	NaN	NaN	NaN	NaN	NaN	NaN
63.25	103.9	0.3	0.27	0.02	0.01	70	70	7.39	37	6.65	21	3.74	4	5.35	NaN	NaN	NaN	NaN	NaN	NaN	NaN	NaN	NaN	NaN	NaN	NaN	NaN	NaN	NaN	NaN	NaN	NaN	NaN	NaN	NaN	NaN	NaN
63.5	104.1	0.3	0.27	0.02	0.01	70	70	7.38	37	6.57	21	3.74	4	5.35	NaN	NaN	NaN	NaN	NaN	NaN	NaN	NaN	NaN	NaN	NaN	NaN	NaN	NaN	NaN	NaN	NaN	NaN	NaN	NaN	NaN	NaN	NaN
63.75	104	0.3	0.27	0.02	0.01	70	70	7.37	37	6.48	21	3.74	4	5.35	NaN	NaN	NaN	NaN	NaN	NaN	NaN	NaN	NaN	NaN	NaN	NaN	NaN	NaN	NaN	NaN	NaN	NaN	NaN	NaN	NaN	NaN	NaN
64	103.9	0.3	0.28	0.02	0.01	70	70	7.36	37	6.48	21	3.74	4	5.35	NaN	NaN	NaN	NaN	NaN	NaN	NaN	NaN	NaN	NaN	NaN	NaN	NaN	NaN	NaN	NaN	NaN	NaN	NaN	NaN	NaN	NaN	NaN
64.25	104.4	0.3	0.27	0.02	0	70	70	7.35	37	6.29	21	3.74	4	5.35	NaN	NaN	NaN	NaN	NaN	NaN	NaN	NaN	NaN	NaN	NaN	NaN	NaN	NaN	NaN	NaN	NaN	NaN	NaN	NaN	NaN	NaN	NaN
64.5	104.5	0.3	0.3	0	0	70	70	7.34	37	0.04	21	3.74	4	5.35	NaN	NaN	NaN	NaN	NaN	NaN	NaN	NaN	NaN	NaN	NaN	NaN	NaN	NaN	NaN	NaN	NaN	NaN	NaN	NaN	NaN	NaN	NaN
64.75	103.7	0.3	0.3	0	0	70	70	7.35	37	0.04	21	3.74	4	5.35	NaN	NaN	NaN	NaN	NaN	NaN	NaN	NaN	NaN	NaN	NaN	NaN	NaN	NaN	NaN	NaN	NaN	NaN	NaN	NaN	NaN	NaN	NaN
65	103.3	0.3	0.3	0	0	70	70	7.36	37	0.28	21	3.74	4	5.35	NaN	NaN	NaN	NaN	NaN	NaN	NaN	NaN	NaN	NaN	NaN	NaN	NaN	NaN	NaN	NaN	NaN	NaN	NaN	NaN	NaN	NaN	NaN
65.25	102.9	0.3	0.3	0	0	70	70	7.37	37	0.67	21	3.74	4	5.35	NaN	NaN	NaN	NaN	NaN	NaN	NaN	NaN	NaN	NaN	NaN	NaN	NaN	NaN	NaN	NaN	NaN	NaN	NaN	NaN	NaN	NaN	NaN
65.5	102.5	0.3	0.29	0	0	70	70	7.39	37	1.17	21	3.74	4	5.35	NaN	NaN	NaN	NaN	NaN	NaN	NaN	NaN	NaN	NaN	NaN	NaN	NaN	NaN	NaN	NaN	NaN	NaN	NaN	NaN	NaN	NaN	NaN
65.75	102.1	0.3	0.29	0.01	0	70	70	7.4	37	1.86	21	3.74	4	5.35	NaN	NaN	NaN	NaN	NaN	NaN	NaN	NaN	NaN	NaN	NaN	NaN	NaN	NaN	NaN	NaN	NaN	NaN	NaN	NaN	NaN	NaN	NaN
66	101.6	0.3	0.29	0.01	0	70	70	7.42	37	2.6	21	3.74	4	5.35	NaN	NaN	NaN	NaN	NaN	NaN	NaN	NaN	NaN	NaN	NaN	NaN	NaN	NaN	NaN	NaN	NaN	NaN	NaN	NaN	NaN	NaN	NaN
66.25	101.2	0.3	0.29	0.01	0	70	70	7.42	37	3.15	21	3.74	4	5.35	NaN	NaN	NaN	NaN	NaN	NaN	NaN	NaN	NaN	NaN	NaN	NaN	NaN	NaN	NaN	NaN	NaN	NaN	NaN	NaN	NaN	NaN	NaN
66.5	101.9	0.3	0.28	0.01	0	70	70	7.42	37	3.7	21	3.74	4	5.35	NaN	NaN	NaN	NaN	NaN	NaN	NaN	NaN	NaN	NaN	NaN	NaN	NaN	NaN	NaN	NaN	NaN	NaN	NaN	NaN	NaN	NaN	NaN
66.75	101.1	0.3	0.28	0.01	0	70	70	7.43	37	4.4	21	3.74	4	5.35	NaN	NaN	NaN	NaN	NaN	NaN	NaN	NaN	NaN	NaN	NaN	NaN	NaN	NaN	NaN	NaN	NaN	NaN	NaN	NaN	NaN	NaN	NaN
67	101.8	0.3	0.28	0.01	0	70	70	7.43	37	4.67	21	3.74	4	5.35	NaN	NaN	NaN	NaN	NaN	NaN	NaN	NaN	NaN	NaN	NaN	NaN	NaN	NaN	NaN	NaN	NaN	NaN	NaN	NaN	NaN	NaN	NaN
67.25	101.7	0.3	0.28	0.02	0	70	70	7.43	37	5.12	21	3.74	4	5.35	NaN	NaN	NaN	NaN	NaN	NaN	NaN	NaN	NaN	NaN	NaN	NaN	NaN	NaN	NaN	NaN	NaN	NaN	NaN	NaN	NaN	NaN	NaN
67.5	102.4	0.3	0.28	0.02	0	70	70	7.42	37	5.49	21	3.74	4	5.35	NaN	NaN	NaN	NaN	NaN	NaN	NaN	NaN	NaN	NaN	NaN	NaN	NaN	NaN	NaN	NaN	NaN	NaN	NaN	NaN	NaN	NaN	NaN
67.75	102.3	0.3	0.28	0.02	0	70	70	7.41	37	5.59	21	3.74	4	5.35	NaN	NaN	NaN	NaN	NaN	NaN	NaN	NaN	NaN	NaN	NaN	NaN	NaN	NaN	NaN	NaN	NaN	NaN	NaN	NaN	NaN	NaN	NaN
68	101.9	0.3	0.28	0.02	0	70	70	7.41	37	5.95	21	3.74	4	5.35	NaN	NaN	NaN	NaN	NaN	NaN	NaN	NaN	NaN	NaN	NaN	NaN	NaN	NaN	NaN	NaN	NaN	NaN	NaN	NaN	NaN	NaN	NaN
68.25	102	0.3	0.28	0.02	0	70	70	7.4	37	5.95	21	3.74	4	5.35	NaN	NaN	NaN	NaN	NaN	NaN	NaN	NaN	NaN	NaN	NaN	NaN	NaN	NaN	NaN	NaN	NaN	NaN	NaN	NaN	NaN	NaN	NaN
68.5	102	0.3	0.28	0.02	0	70	70	7.38	37	5.9	21	3.74	4	5.35	NaN	NaN	NaN	NaN	NaN	NaN	NaN	NaN	NaN	NaN	NaN	NaN	NaN	NaN	NaN	NaN	NaN	NaN	NaN	NaN	NaN	NaN	NaN
68.75	101.3	0.3	0.28	0.02	0	70	70	7.38	37	5.87	21	3.74	4	5.35	NaN	NaN	NaN	NaN	NaN	NaN	NaN	NaN	NaN	NaN	NaN	NaN	NaN	NaN	NaN	NaN	NaN	NaN	NaN	NaN	NaN	NaN	NaN
69	101.5	0.3	0.28	0.02	0	70	70	7.37	37	5.91	21	3.74	4	5.35	NaN	NaN	NaN	NaN	NaN	NaN	NaN	NaN	NaN	NaN	NaN	NaN	NaN	NaN	NaN	NaN	NaN	NaN	NaN	NaN	NaN	NaN	NaN
69.25	101.4	0.3	0.28	0.02	0	70	70	7.36	37	5.65	21	3.74	4	5.35	NaN	NaN	NaN	NaN	NaN	NaN	NaN	NaN	NaN	NaN	NaN	NaN	NaN	NaN	NaN	NaN	NaN	NaN	NaN	NaN	NaN	NaN	NaN
69.5	101	0.3	0.3	0	0	70	70	7.35	37	0.04	21	3.74	4	5.35	NaN	NaN	NaN	NaN	NaN	NaN	NaN	NaN	NaN	NaN	NaN	NaN	NaN	NaN	NaN	NaN	NaN	NaN	NaN	NaN	NaN	NaN	NaN
69.75	101.5	0.3	0.3	0	0	70	70	7.35	37	0.04	21	3.74	4	5.35	NaN	NaN	NaN	NaN	NaN	NaN	NaN	NaN	NaN	NaN	NaN	NaN	NaN	NaN	NaN	NaN	NaN	NaN	NaN	NaN	NaN	NaN	NaN
70	100.6	0.3	0.3	0	0	70	70	7.35	37	0.08	21	3.74	4	5.35	NaN	NaN	NaN	NaN	NaN	NaN	NaN	NaN	NaN	NaN	NaN	NaN	NaN	NaN	NaN	NaN	NaN	NaN	NaN	NaN	NaN	NaN	NaN
70.25	100.2	0.3	0.3	0	0	70	70	7.36	37	0.37	21	3.74	4	5.35	NaN	NaN	NaN	NaN	NaN	NaN	NaN	NaN	NaN	NaN	NaN	NaN	NaN	NaN	NaN	NaN	NaN	NaN	NaN	NaN	NaN	NaN	NaN
70.5	99.8	0.3	0.3	0	0	70	70	7.37	37	0.76	21	3.74	4	5.35	NaN	NaN	NaN	NaN	NaN	NaN	NaN	NaN	NaN	NaN	NaN	NaN	NaN	NaN	NaN	NaN	NaN	NaN	NaN	NaN	NaN	NaN	NaN
70.75	99.5	0.3	0.29	0	0	70	70	7.39	37	1.3	21	3.74	4	5.35	NaN	NaN	NaN	NaN	NaN	NaN	NaN	NaN	NaN	NaN	NaN	NaN	NaN	NaN	NaN	NaN	NaN	NaN	NaN	NaN	NaN	NaN	NaN
71	99.3	0.3	0.29	0.01	0	80	70	7.4	37	1.97	21	3.74	4	5.35	NaN	NaN	NaN	NaN	NaN	NaN	NaN	NaN	NaN	NaN	NaN	NaN	NaN	NaN	NaN	NaN	NaN	NaN	NaN	NaN	NaN	NaN	NaN
71.25	98.3	0.3	0.29	0.01	0	70	70	7.41	37	2.58	21	3.74	4	5.35	NaN	NaN	NaN	NaN	NaN	NaN	NaN	NaN	NaN	NaN	NaN	NaN	NaN	NaN	NaN	NaN	NaN	NaN	NaN	NaN	NaN	NaN	NaN
71.5	98	0.3	0.29	0.01	0	70	70	7.41	37	2.91	21	3.74	4	5.35	NaN	NaN	NaN	NaN	NaN	NaN	NaN	NaN	NaN	NaN	NaN	NaN	NaN	NaN	NaN	NaN	NaN	NaN	NaN	NaN	NaN	NaN	NaN
71.75	98.6	0.3	0.28	0.01	0	70	70	7.42	37	3.44	21	3.74	4	5.35	NaN	NaN	NaN	NaN	NaN	NaN	NaN	NaN	NaN	NaN	NaN	NaN	NaN	NaN	NaN	NaN	NaN	NaN	NaN	NaN	NaN	NaN	NaN
72	98.5	0.3	0.28	0.01	0	70	70	7.42	37	4.02	21	3.74	4	5.35	670	2.2	1.474	0	1	2.2	1.431	0.051	NaN	173750	8.23445e-06	2.2971	170	1.68	18.816	1.0146	71.0048	0.00976764	NaN	NaN	NaN	NaN	NaN
72.25	99.5	0.3	0.28	0.01	0	70	70	7.42	37	4.27	21	3.74	4	5.35	NaN	NaN	NaN	NaN	NaN	NaN	NaN	NaN	NaN	NaN	NaN	NaN	NaN	NaN	NaN	NaN	NaN	NaN	NaN	NaN	NaN	NaN	NaN
72.5	99.2	0.3	0.28	0.01	0	70	70	7.42	37	4.76	21	3.74	4	5.35	NaN	NaN	NaN	NaN	NaN	NaN	NaN	NaN	NaN	NaN	NaN	NaN	NaN	NaN	NaN	NaN	NaN	NaN	NaN	NaN	NaN	NaN	NaN
72.75	100.1	0.3	0.28	0.01	0	70	70	7.41	37	4.87	21	3.74	4	5.35	NaN	NaN	NaN	NaN	NaN	NaN	NaN	NaN	NaN	NaN	NaN	NaN	NaN	NaN	NaN	NaN	NaN	NaN	NaN	NaN	NaN	NaN	NaN
73	98.6	0.3	0.28	0.01	0	70	70	7.4	37	4.89	21	3.74	4	5.35	NaN	NaN	NaN	NaN	NaN	NaN	NaN	NaN	NaN	NaN	NaN	NaN	NaN	NaN	NaN	NaN	NaN	NaN	NaN	NaN	NaN	NaN	NaN
73.25	99.2	0.3	0.28	0.02	0	70	70	7.4	37	5.17	21	3.74	4	5.35	NaN	NaN	NaN	NaN	NaN	NaN	NaN	NaN	NaN	NaN	NaN	NaN	NaN	NaN	NaN	NaN	NaN	NaN	NaN	NaN	NaN	NaN	NaN
73.5	98.9	0.3	0.28	0.02	0	70	70	7.38	37	5.11	21	3.74	4	5.35	NaN	NaN	NaN	NaN	NaN	NaN	NaN	NaN	NaN	NaN	NaN	NaN	NaN	NaN	NaN	NaN	NaN	NaN	NaN	NaN	NaN	NaN	NaN
73.75	100.5	0.3	0.28	0.02	0	70	70	7.38	37	5.1	21	3.74	4	5.35	NaN	NaN	NaN	NaN	NaN	NaN	NaN	NaN	NaN	NaN	NaN	NaN	NaN	NaN	NaN	NaN	NaN	NaN	NaN	NaN	NaN	NaN	NaN
74	99.6	0.3	0.28	0.01	0	70	70	7.37	37	5.03	21	3.74	4	5.35	NaN	NaN	NaN	NaN	NaN	NaN	NaN	NaN	NaN	NaN	NaN	NaN	NaN	NaN	NaN	NaN	NaN	NaN	NaN	NaN	NaN	NaN	NaN
74.25	99.3	0.3	0.28	0.01	0	70	70	7.36	37	4.96	21	3.74	4	5.35	NaN	NaN	NaN	NaN	NaN	NaN	NaN	NaN	NaN	NaN	NaN	NaN	NaN	NaN	NaN	NaN	NaN	NaN	NaN	NaN	NaN	NaN	NaN
74.5	102.1	0.3	0.28	0.01	0	70	70	7.36	37	4.9	21	3.74	4	5.35	NaN	NaN	NaN	NaN	NaN	NaN	NaN	NaN	NaN	NaN	NaN	NaN	NaN	NaN	NaN	NaN	NaN	NaN	NaN	NaN	NaN	NaN	NaN
74.75	100.9	0.3	0.3	0	0	70	70	7.35	37	0.04	21	3.74	4	5.35	NaN	NaN	NaN	NaN	NaN	NaN	NaN	NaN	NaN	NaN	NaN	NaN	NaN	NaN	NaN	NaN	NaN	NaN	NaN	NaN	NaN	NaN	NaN
75	100.1	0.3	0.3	0	0	70	70	7.36	37	0.16	21	3.74	4	5.35	NaN	NaN	NaN	NaN	NaN	NaN	NaN	NaN	NaN	NaN	NaN	NaN	NaN	NaN	NaN	NaN	NaN	NaN	NaN	NaN	NaN	NaN	NaN
75.25	99.5	0.3	0.3	0	0	70	70	7.36	37	0.38	21	3.74	4	5.35	NaN	NaN	NaN	NaN	NaN	NaN	NaN	NaN	NaN	NaN	NaN	NaN	NaN	NaN	NaN	NaN	NaN	NaN	NaN	NaN	NaN	NaN	NaN
75.5	99	0.3	0.3	0	0	70	70	7.37	37	0.75	21	3.74	4	5.35	NaN	NaN	NaN	NaN	NaN	NaN	NaN	NaN	NaN	NaN	NaN	NaN	NaN	NaN	NaN	NaN	NaN	NaN	NaN	NaN	NaN	NaN	NaN
75.75	98.7	0.3	0.29	0	0	70	70	7.38	37	1.08	21	3.74	4	5.35	NaN	NaN	NaN	NaN	NaN	NaN	NaN	NaN	NaN	NaN	NaN	NaN	NaN	NaN	NaN	NaN	NaN	NaN	NaN	NaN	NaN	NaN	NaN
76	97.3	0.3	0.29	0	0	70	70	7.38	37	1.38	21	3.74	4	5.35	NaN	NaN	NaN	NaN	NaN	NaN	NaN	NaN	NaN	NaN	NaN	NaN	NaN	NaN	NaN	NaN	NaN	NaN	NaN	NaN	NaN	NaN	NaN
76.25	96.5	0.3	0.29	0.01	0	70	70	7.39	37	1.81	21	3.74	4	5.35	NaN	NaN	NaN	NaN	NaN	NaN	NaN	NaN	NaN	NaN	NaN	NaN	NaN	NaN	NaN	NaN	NaN	NaN	NaN	NaN	NaN	NaN	NaN
76.5	95.8	0.3	0.29	0.01	0	70	70	7.39	37	2.07	21	3.74	4	5.35	NaN	NaN	NaN	NaN	NaN	NaN	NaN	NaN	NaN	NaN	NaN	NaN	NaN	NaN	NaN	NaN	NaN	NaN	NaN	NaN	NaN	NaN	NaN
76.75	95.6	0.3	0.29	0.01	0	70	70	7.4	37	2.5	21	3.74	4	5.35	NaN	NaN	NaN	NaN	NaN	NaN	NaN	NaN	NaN	NaN	NaN	NaN	NaN	NaN	NaN	NaN	NaN	NaN	NaN	NaN	NaN	NaN	NaN
77	95.6	0.3	0.29	0.01	0	70	70	7.4	37	2.88	21	3.74	4	5.35	NaN	NaN	NaN	NaN	NaN	NaN	NaN	NaN	NaN	NaN	NaN	NaN	NaN	NaN	NaN	NaN	NaN	NaN	NaN	NaN	NaN	NaN	NaN
77.25	95.6	0.3	0.29	0.01	0	70	70	7.4	37	3.03	21	3.74	4	5.35	NaN	NaN	NaN	NaN	NaN	NaN	NaN	NaN	NaN	NaN	NaN	NaN	NaN	NaN	NaN	NaN	NaN	NaN	NaN	NaN	NaN	NaN	NaN
77.5	97.1	0.3	0.29	0.01	0	70	70	7.4	37	3.43	21	3.74	4	5.35	NaN	NaN	NaN	NaN	NaN	NaN	NaN	NaN	NaN	NaN	NaN	NaN	NaN	NaN	NaN	NaN	NaN	NaN	NaN	NaN	NaN	NaN	NaN
77.75	99.2	0.3	0.28	0.01	0	70	70	7.4	37	3.74	21	3.74	4	5.35	NaN	NaN	NaN	NaN	NaN	NaN	NaN	NaN	NaN	NaN	NaN	NaN	NaN	NaN	NaN	NaN	NaN	NaN	NaN	NaN	NaN	NaN	NaN
78	98.8	0.28	0.27	0.01	0	70	70	7.39	37	3.87	21	3.74	4	5.35	NaN	NaN	NaN	NaN	NaN	NaN	NaN	NaN	NaN	NaN	NaN	NaN	NaN	NaN	NaN	NaN	NaN	NaN	NaN	NaN	NaN	NaN	NaN
78.25	97.5	0.3	0.28	0.01	0	70	70	7.39	37	3.97	21	3.74	4	5.35	NaN	NaN	NaN	NaN	NaN	NaN	NaN	NaN	NaN	NaN	NaN	NaN	NaN	NaN	NaN	NaN	NaN	NaN	NaN	NaN	NaN	NaN	NaN
78.5	96.4	0.3	0.28	0.01	0	70	70	7.38	37	3.95	21	3.74	4	5.35	NaN	NaN	NaN	NaN	NaN	NaN	NaN	NaN	NaN	NaN	NaN	NaN	NaN	NaN	NaN	NaN	NaN	NaN	NaN	NaN	NaN	NaN	NaN
78.75	95.1	0.3	0.28	0.01	0	70	70	7.37	37	3.82	21	3.74	4	5.35	NaN	NaN	NaN	NaN	NaN	NaN	NaN	NaN	NaN	NaN	NaN	NaN	NaN	NaN	NaN	NaN	NaN	NaN	NaN	NaN	NaN	NaN	NaN
79	94.5	0.3	0.29	0.01	0	70	70	7.36	37	3.56	21	3.74	4	5.35	NaN	NaN	NaN	NaN	NaN	NaN	NaN	NaN	NaN	NaN	NaN	NaN	NaN	NaN	NaN	NaN	NaN	NaN	NaN	NaN	NaN	NaN	NaN
79.25	93.8	0.3	0.29	0.01	0	70	70	7.35	37	3.54	21	3.74	4	5.35	NaN	NaN	NaN	NaN	NaN	NaN	NaN	NaN	NaN	NaN	NaN	NaN	NaN	NaN	NaN	NaN	NaN	NaN	NaN	NaN	NaN	NaN	NaN
79.5	96.4	0.3	0.3	0	0	70	70	7.35	37	0.04	21	3.74	4	5.35	NaN	NaN	NaN	NaN	NaN	NaN	NaN	NaN	NaN	NaN	NaN	NaN	NaN	NaN	NaN	NaN	NaN	NaN	NaN	NaN	NaN	NaN	NaN
79.75	96.3	0.3	0.3	0	0	70	70	7.35	37	0.09	21	3.74	4	5.35	NaN	NaN	NaN	NaN	NaN	NaN	NaN	NaN	NaN	NaN	NaN	NaN	NaN	NaN	NaN	NaN	NaN	NaN	NaN	NaN	NaN	NaN	NaN
80	95.8	0.3	0.3	0	0	70	70	7.36	37	0.27	21	3.74	4	5.35	NaN	NaN	NaN	NaN	NaN	NaN	NaN	NaN	NaN	NaN	NaN	NaN	NaN	NaN	NaN	NaN	NaN	NaN	NaN	NaN	NaN	NaN	NaN
80.25	95.5	0.3	0.3	0	0	70	70	7.37	37	0.57	21	3.74	4	5.35	NaN	NaN	NaN	NaN	NaN	NaN	NaN	NaN	NaN	NaN	NaN	NaN	NaN	NaN	NaN	NaN	NaN	NaN	NaN	NaN	NaN	NaN	NaN
80.5	94.9	0.3	0.29	0	0	70	70	7.38	37	0.91	21	3.74	4	5.35	NaN	NaN	NaN	NaN	NaN	NaN	NaN	NaN	NaN	NaN	NaN	NaN	NaN	NaN	NaN	NaN	NaN	NaN	NaN	NaN	NaN	NaN	NaN
80.75	94.2	0.3	0.29	0	0	70	70	7.38	37	1.29	21	3.74	4	5.35	NaN	NaN	NaN	NaN	NaN	NaN	NaN	NaN	NaN	NaN	NaN	NaN	NaN	NaN	NaN	NaN	NaN	NaN	NaN	NaN	NaN	NaN	NaN
81	94.2	0.3	0.29	0	0	70	70	7.38	37	1.46	21	3.74	4	5.35	NaN	NaN	NaN	NaN	NaN	NaN	NaN	NaN	NaN	NaN	NaN	NaN	NaN	NaN	NaN	NaN	NaN	NaN	NaN	NaN	NaN	NaN	NaN
81.25	94.2	0.3	0.29	0.01	0	70	70	7.39	37	1.84	21	3.74	4	5.35	NaN	NaN	NaN	NaN	NaN	NaN	NaN	NaN	NaN	NaN	NaN	NaN	NaN	NaN	NaN	NaN	NaN	NaN	NaN	NaN	NaN	NaN	NaN
81.5	93.5	0.3	0.29	0.01	0	70	70	7.39	37	2.06	21	3.74	4	5.35	NaN	NaN	NaN	NaN	NaN	NaN	NaN	NaN	NaN	NaN	NaN	NaN	NaN	NaN	NaN	NaN	NaN	NaN	NaN	NaN	NaN	NaN	NaN
81.75	93.5	0.3	0.29	0.01	0	70	70	7.39	37	2.31	21	3.74	4	5.35	NaN	NaN	NaN	NaN	NaN	NaN	NaN	NaN	NaN	NaN	NaN	NaN	NaN	NaN	NaN	NaN	NaN	NaN	NaN	NaN	NaN	NaN	NaN
82	92.7	0.3	0.29	0.01	0	70	70	7.39	37	2.46	21	3.74	4	5.35	NaN	NaN	NaN	NaN	NaN	NaN	NaN	NaN	NaN	NaN	NaN	NaN	NaN	NaN	NaN	NaN	NaN	NaN	NaN	NaN	NaN	NaN	NaN
82.25	92	0.3	0.29	0.01	0	70	70	7.38	37	2.51	21	3.74	4	5.35	NaN	NaN	NaN	NaN	NaN	NaN	NaN	NaN	NaN	NaN	NaN	NaN	NaN	NaN	NaN	NaN	NaN	NaN	NaN	NaN	NaN	NaN	NaN
82.5	91.1	0.3	0.29	0.01	0	70	70	7.38	37	2.73	21	3.74	4	5.35	NaN	NaN	NaN	NaN	NaN	NaN	NaN	NaN	NaN	NaN	NaN	NaN	NaN	NaN	NaN	NaN	NaN	NaN	NaN	NaN	NaN	NaN	NaN
82.75	91.4	0.3	0.29	0.01	0	70	70	7.37	37	2.52	21	3.74	4	5.35	NaN	NaN	NaN	NaN	NaN	NaN	NaN	NaN	NaN	NaN	NaN	NaN	NaN	NaN	NaN	NaN	NaN	NaN	NaN	NaN	NaN	NaN	NaN
83	91.8	0.3	0.29	0.01	0	70	70	7.37	37	2.59	21	3.74	4	5.35	NaN	NaN	NaN	NaN	NaN	NaN	NaN	NaN	NaN	NaN	NaN	NaN	NaN	NaN	NaN	NaN	NaN	NaN	NaN	NaN	NaN	NaN	NaN
83.25	92	0.3	0.29	0.01	0	70	70	7.37	37	2.75	21	3.74	4	5.35	NaN	NaN	NaN	NaN	NaN	NaN	NaN	NaN	NaN	NaN	NaN	NaN	NaN	NaN	NaN	NaN	NaN	NaN	NaN	NaN	NaN	NaN	NaN
83.5	91.6	0.3	0.29	0.01	0	70	70	7.36	37	2.53	21	3.74	4	5.35	NaN	NaN	NaN	NaN	NaN	NaN	NaN	NaN	NaN	NaN	NaN	NaN	NaN	NaN	NaN	NaN	NaN	NaN	NaN	NaN	NaN	NaN	NaN
83.75	92.7	0.3	0.29	0.01	0	70	70	7.35	37	2.5	21	3.74	4	5.35	NaN	NaN	NaN	NaN	NaN	NaN	NaN	NaN	NaN	NaN	NaN	NaN	NaN	NaN	NaN	NaN	NaN	NaN	NaN	NaN	NaN	NaN	NaN
84	91.9	0.3	0.29	0.01	0	70	70	7.35	37	2.54	21	3.74	4	5.35	NaN	NaN	NaN	NaN	NaN	NaN	NaN	NaN	NaN	NaN	NaN	NaN	NaN	NaN	NaN	NaN	NaN	NaN	NaN	NaN	NaN	NaN	NaN
84.25	91.1	0.3	0.3	0	0	70	70	7.34	37	0.04	21	3.74	4	5.35	NaN	NaN	NaN	NaN	NaN	NaN	NaN	NaN	NaN	NaN	NaN	NaN	NaN	NaN	NaN	NaN	NaN	NaN	NaN	NaN	NaN	NaN	NaN
84.5	90.6	0.3	0.3	0	0	70	70	7.34	37	0.04	21	3.74	4	5.35	NaN	NaN	NaN	NaN	NaN	NaN	NaN	NaN	NaN	NaN	NaN	NaN	NaN	NaN	NaN	NaN	NaN	NaN	NaN	NaN	NaN	NaN	NaN
84.75	90.6	0.3	0.3	0	0	70	70	7.34	37	0.04	21	3.74	4	5.35	NaN	NaN	NaN	NaN	NaN	NaN	NaN	NaN	NaN	NaN	NaN	NaN	NaN	NaN	NaN	NaN	NaN	NaN	NaN	NaN	NaN	NaN	NaN
85	90.3	0.3	0.3	0	0	70	70	7.35	37	0.04	21	3.74	4	5.35	NaN	NaN	NaN	NaN	NaN	NaN	NaN	NaN	NaN	NaN	NaN	NaN	NaN	NaN	NaN	NaN	NaN	NaN	NaN	NaN	NaN	NaN	NaN
85.25	89.5	0.3	0.3	0	0	70	70	7.35	37	0.04	21	3.74	4	5.35	NaN	NaN	NaN	NaN	NaN	NaN	NaN	NaN	NaN	NaN	NaN	NaN	NaN	NaN	NaN	NaN	NaN	NaN	NaN	NaN	NaN	NaN	NaN
85.5	88.2	0.3	0.3	0	0	70	70	7.35	37	0.16	21	3.74	4	5.35	NaN	NaN	NaN	NaN	NaN	NaN	NaN	NaN	NaN	NaN	NaN	NaN	NaN	NaN	NaN	NaN	NaN	NaN	NaN	NaN	NaN	NaN	NaN
85.75	87.8	0.3	0.3	0	0	70	70	7.36	37	0.32	21	3.74	4	5.35	NaN	NaN	NaN	NaN	NaN	NaN	NaN	NaN	NaN	NaN	NaN	NaN	NaN	NaN	NaN	NaN	NaN	NaN	NaN	NaN	NaN	NaN	NaN
86	87.5	0.3	0.3	0	0	70	70	7.37	37	0.55	21	3.74	4	5.35	NaN	NaN	NaN	NaN	NaN	NaN	NaN	NaN	NaN	NaN	NaN	NaN	NaN	NaN	NaN	NaN	NaN	NaN	NaN	NaN	NaN	NaN	NaN
86.25	87.6	0.3	0.3	0	0	70	70	7.37	37	0.81	21	3.74	4	5.35	NaN	NaN	NaN	NaN	NaN	NaN	NaN	NaN	NaN	NaN	NaN	NaN	NaN	NaN	NaN	NaN	NaN	NaN	NaN	NaN	NaN	NaN	NaN
86.5	89.7	0.3	0.29	0	0	70	70	7.38	37	1.17	21	3.74	4	5.35	NaN	NaN	NaN	NaN	NaN	NaN	NaN	NaN	NaN	NaN	NaN	NaN	NaN	NaN	NaN	NaN	NaN	NaN	NaN	NaN	NaN	NaN	NaN
86.75	89.2	0.3	0.29	0	0	70	70	7.38	37	1.5	21	3.74	4	5.35	NaN	NaN	NaN	NaN	NaN	NaN	NaN	NaN	NaN	NaN	NaN	NaN	NaN	NaN	NaN	NaN	NaN	NaN	NaN	NaN	NaN	NaN	NaN
87	89.3	0.3	0.29	0.01	0	70	70	7.39	37	1.81	21	3.74	4	5.35	NaN	NaN	NaN	NaN	NaN	NaN	NaN	NaN	NaN	NaN	NaN	NaN	NaN	NaN	NaN	NaN	NaN	NaN	NaN	NaN	NaN	NaN	NaN
87.25	89.5	0.3	0.29	0.01	0	70	70	7.39	37	2.17	21	3.74	4	5.35	NaN	NaN	NaN	NaN	NaN	NaN	NaN	NaN	NaN	NaN	NaN	NaN	NaN	NaN	NaN	NaN	NaN	NaN	NaN	NaN	NaN	NaN	NaN
87.5	89.2	0.3	0.29	0.01	0	70	70	7.38	37	2.01	21	3.74	4	5.35	NaN	NaN	NaN	NaN	NaN	NaN	NaN	NaN	NaN	NaN	NaN	NaN	NaN	NaN	NaN	NaN	NaN	NaN	NaN	NaN	NaN	NaN	NaN
87.75	90.9	0.3	0.29	0.01	0	70	70	7.38	37	2.07	21	3.74	4	5.35	NaN	NaN	NaN	NaN	NaN	NaN	NaN	NaN	NaN	NaN	NaN	NaN	NaN	NaN	NaN	NaN	NaN	NaN	NaN	NaN	NaN	NaN	NaN
88	91.2	0.3	0.29	0.01	0	70	70	7.37	37	2.22	21	3.74	4	5.35	NaN	NaN	NaN	NaN	NaN	NaN	NaN	NaN	NaN	NaN	NaN	NaN	NaN	NaN	NaN	NaN	NaN	NaN	NaN	NaN	NaN	NaN	NaN
88.25	90.6	0.3	0.29	0.01	0	70	70	7.37	37	2.16	21	3.74	4	5.35	NaN	NaN	NaN	NaN	NaN	NaN	NaN	NaN	NaN	NaN	NaN	NaN	NaN	NaN	NaN	NaN	NaN	NaN	NaN	NaN	NaN	NaN	NaN
88.5	90.3	0.3	0.29	0.01	0	70	70	7.36	37	2.04	21	3.74	4	5.35	NaN	NaN	NaN	NaN	NaN	NaN	NaN	NaN	NaN	NaN	NaN	NaN	NaN	NaN	NaN	NaN	NaN	NaN	NaN	NaN	NaN	NaN	NaN
88.75	89.6	0.3	0.29	0.01	0	70	70	7.36	37	2.03	21	3.74	4	5.35	NaN	NaN	NaN	NaN	NaN	NaN	NaN	NaN	NaN	NaN	NaN	NaN	NaN	NaN	NaN	NaN	NaN	NaN	NaN	NaN	NaN	NaN	NaN
89	89	0.3	0.3	0	0	70	70	7.34	37	0.04	21	3.74	4	5.35	NaN	NaN	NaN	NaN	NaN	NaN	NaN	NaN	NaN	NaN	NaN	NaN	NaN	NaN	NaN	NaN	NaN	NaN	NaN	NaN	NaN	NaN	NaN
89.25	88.3	0.3	0.3	0	0	70	70	7.33	37	0.04	21	3.74	4	5.35	NaN	NaN	NaN	NaN	NaN	NaN	NaN	NaN	NaN	NaN	NaN	NaN	NaN	NaN	NaN	NaN	NaN	NaN	NaN	NaN	NaN	NaN	NaN
89.5	88	0.3	0.3	0	0	70	70	7.33	37	0.04	21	3.74	4	5.35	NaN	NaN	NaN	NaN	NaN	NaN	NaN	NaN	NaN	NaN	NaN	NaN	NaN	NaN	NaN	NaN	NaN	NaN	NaN	NaN	NaN	NaN	NaN
89.75	87	0.3	0.3	0	0	70	70	7.33	37	0.04	21	3.74	4	5.35	NaN	NaN	NaN	NaN	NaN	NaN	NaN	NaN	NaN	NaN	NaN	NaN	NaN	NaN	NaN	NaN	NaN	NaN	NaN	NaN	NaN	NaN	NaN
90	86.4	0.3	0.3	0	0	70	70	7.33	37	0.04	21	3.74	4	5.35	NaN	NaN	NaN	NaN	NaN	NaN	NaN	NaN	NaN	NaN	NaN	NaN	NaN	NaN	NaN	NaN	NaN	NaN	NaN	NaN	NaN	NaN	NaN
90.25	86.1	0.3	0.3	0	0	70	70	7.33	37	0.04	21	3.74	4	5.35	NaN	NaN	NaN	NaN	NaN	NaN	NaN	NaN	NaN	NaN	NaN	NaN	NaN	NaN	NaN	NaN	NaN	NaN	NaN	NaN	NaN	NaN	NaN
90.5	85.8	0.3	0.3	0	0	70	70	7.34	37	0.04	21	3.74	4	5.35	NaN	NaN	NaN	NaN	NaN	NaN	NaN	NaN	NaN	NaN	NaN	NaN	NaN	NaN	NaN	NaN	NaN	NaN	NaN	NaN	NaN	NaN	NaN
90.75	85.1	0.3	0.3	0	0	70	70	7.34	37	0.04	21	3.74	4	5.35	NaN	NaN	NaN	NaN	NaN	NaN	NaN	NaN	NaN	NaN	NaN	NaN	NaN	NaN	NaN	NaN	NaN	NaN	NaN	NaN	NaN	NaN	NaN
91	84.7	0.3	0.3	0	0	70	70	7.34	37	0.04	21	3.74	4	5.35	NaN	NaN	NaN	NaN	NaN	NaN	NaN	NaN	NaN	NaN	NaN	NaN	NaN	NaN	NaN	NaN	NaN	NaN	NaN	NaN	NaN	NaN	NaN
91.25	85.1	0.3	0.3	0	0	70	70	7.35	37	0.04	21	3.74	4	5.35	NaN	NaN	NaN	NaN	NaN	NaN	NaN	NaN	NaN	NaN	NaN	NaN	NaN	NaN	NaN	NaN	NaN	NaN	NaN	NaN	NaN	NaN	NaN
91.5	85.3	0.3	0.3	0	0	70	70	7.35	37	0.04	21	3.74	4	5.35	NaN	NaN	NaN	NaN	NaN	NaN	NaN	NaN	NaN	NaN	NaN	NaN	NaN	NaN	NaN	NaN	NaN	NaN	NaN	NaN	NaN	NaN	NaN
91.75	85.2	0.3	0.3	0	0	70	70	7.35	37	0.04	21	3.74	4	5.35	NaN	NaN	NaN	NaN	NaN	NaN	NaN	NaN	NaN	NaN	NaN	NaN	NaN	NaN	NaN	NaN	NaN	NaN	NaN	NaN	NaN	NaN	NaN
92	85.4	0.3	0.3	0	0	70	70	7.35	37	0.04	21	3.74	4	5.35	NaN	NaN	NaN	NaN	NaN	NaN	NaN	NaN	NaN	NaN	NaN	NaN	NaN	NaN	NaN	NaN	NaN	NaN	NaN	NaN	NaN	NaN	NaN
92.25	85.5	0.3	0.3	0	0	70	70	7.35	37	0.08	21	3.74	4	5.35	NaN	NaN	NaN	NaN	NaN	NaN	NaN	NaN	NaN	NaN	NaN	NaN	NaN	NaN	NaN	NaN	NaN	NaN	NaN	NaN	NaN	NaN	NaN
92.5	85.9	0.3	0.3	0	0	70	70	7.36	37	0.16	21	3.74	4	5.35	NaN	NaN	NaN	NaN	NaN	NaN	NaN	NaN	NaN	NaN	NaN	NaN	NaN	NaN	NaN	NaN	NaN	NaN	NaN	NaN	NaN	NaN	NaN
92.75	85.9	0.3	0.3	0	0	70	70	7.36	37	0.22	21	3.74	4	5.35	NaN	NaN	NaN	NaN	NaN	NaN	NaN	NaN	NaN	NaN	NaN	NaN	NaN	NaN	NaN	NaN	NaN	NaN	NaN	NaN	NaN	NaN	NaN
93	84.4	0.3	0.3	0	0	70	70	7.35	37	0.18	21	3.74	4	5.35	NaN	NaN	NaN	NaN	NaN	NaN	NaN	NaN	NaN	NaN	NaN	NaN	NaN	NaN	NaN	NaN	NaN	NaN	NaN	NaN	NaN	NaN	NaN
93.25	83.4	0.3	0.3	0	0	70	70	7.35	37	0.04	21	3.74	4	5.35	NaN	NaN	NaN	NaN	NaN	NaN	NaN	NaN	NaN	NaN	NaN	NaN	NaN	NaN	NaN	NaN	NaN	NaN	NaN	NaN	NaN	NaN	NaN
93.5	83.2	0.3	0.3	0	0	70	70	7.35	37	0.04	21	3.74	4	5.35	NaN	NaN	NaN	NaN	NaN	NaN	NaN	NaN	NaN	NaN	NaN	NaN	NaN	NaN	NaN	NaN	NaN	NaN	NaN	NaN	NaN	NaN	NaN
93.75	83.1	0.3	0.3	0	0	70	70	7.35	37	0.04	21	3.74	4	5.35	NaN	NaN	NaN	NaN	NaN	NaN	NaN	NaN	NaN	NaN	NaN	NaN	NaN	NaN	NaN	NaN	NaN	NaN	NaN	NaN	NaN	NaN	NaN
94	83.2	0.3	0.3	0	0	70	70	7.35	37	0.04	21	3.74	4	5.35	NaN	NaN	NaN	NaN	NaN	NaN	NaN	NaN	NaN	NaN	NaN	NaN	NaN	NaN	NaN	NaN	NaN	NaN	NaN	NaN	NaN	NaN	NaN
94.25	83.6	0.3	0.3	0	0	70	70	7.35	37	0.04	21	3.74	4	5.35	NaN	NaN	NaN	NaN	NaN	NaN	NaN	NaN	NaN	NaN	NaN	NaN	NaN	NaN	NaN	NaN	NaN	NaN	NaN	NaN	NaN	NaN	NaN
94.5	83.7	0.3	0.3	0	0	70	70	7.35	37	0.04	21	3.74	4	5.35	NaN	NaN	NaN	NaN	NaN	NaN	NaN	NaN	NaN	NaN	NaN	NaN	NaN	NaN	NaN	NaN	NaN	NaN	NaN	NaN	NaN	NaN	NaN
94.75	83.8	0.3	0.3	0	0	70	70	7.35	37	0.04	21	3.74	4	5.35	NaN	NaN	NaN	NaN	NaN	NaN	NaN	NaN	NaN	NaN	NaN	NaN	NaN	NaN	NaN	NaN	NaN	NaN	NaN	NaN	NaN	NaN	NaN
95	83.6	0.3	0.3	0	0	70	70	7.34	37	0.04	21	3.74	4	5.35	NaN	NaN	NaN	NaN	NaN	NaN	NaN	NaN	NaN	NaN	NaN	NaN	NaN	NaN	NaN	NaN	NaN	NaN	NaN	NaN	NaN	NaN	NaN
95.25	83.5	0.3	0.3	0	0	70	70	7.34	37	0.04	21	3.74	4	5.35	NaN	NaN	NaN	NaN	NaN	NaN	NaN	NaN	NaN	NaN	NaN	NaN	NaN	NaN	NaN	NaN	NaN	NaN	NaN	NaN	NaN	NaN	NaN
95.5	84.1	0.3	0.3	0	0	70	70	7.34	37	0.04	21	3.74	4	5.35	NaN	NaN	NaN	NaN	NaN	NaN	NaN	NaN	NaN	NaN	NaN	NaN	NaN	NaN	NaN	NaN	NaN	NaN	NaN	NaN	NaN	NaN	NaN
95.75	82.8	0.3	0.3	0	0	70	70	7.34	37	0.04	21	3.74	4	5.35	NaN	NaN	NaN	NaN	NaN	NaN	NaN	NaN	NaN	NaN	NaN	NaN	NaN	NaN	NaN	NaN	NaN	NaN	NaN	NaN	NaN	NaN	NaN
96	82	0.3	0.3	0	0	70	70	7.33	37	0.04	21	3.74	4	5.35	660	1.5	0.99	NaN	NaN	NaN	0.7	0.0291667	NaN	460000	1.52174e-06	2.9971	166	2.3	25.76	2.41923	39.7052	0.0174675	NaN	NaN	NaN	NaN	NaN
96.25	82.3	0.3	0.3	0	0	70	70	7.33	37	0.04	21	3.74	4	5.35	NaN	NaN	NaN	NaN	NaN	NaN	NaN	NaN	NaN	NaN	NaN	NaN	NaN	NaN	NaN	NaN	NaN	NaN	NaN	NaN	NaN	NaN	NaN
96.5	82.1	0.3	0.3	0	0	70	70	7.33	37	0.04	21	3.74	4	5.35	NaN	NaN	NaN	NaN	NaN	NaN	NaN	NaN	NaN	NaN	NaN	NaN	NaN	NaN	NaN	NaN	NaN	NaN	NaN	NaN	NaN	NaN	NaN
96.75	82.7	0.3	0.3	0	0	70	70	7.33	37	0.04	21	3.74	4	5.35	NaN	NaN	NaN	1.386	2	3.075	NaN	NaN	NaN	NaN	NaN	NaN	NaN	NaN	NaN	NaN	NaN	NaN	NaN	NaN	NaN	NaN	NaN
97	82.7	0.3	0.3	0	0	70	70	7.33	37	0.04	21	3.74	4	5.35	NaN	NaN	NaN	NaN	NaN	NaN	NaN	NaN	NaN	NaN	NaN	NaN	NaN	NaN	NaN	NaN	NaN	NaN	NaN	NaN	NaN	NaN	NaN
97.25	81.4	0.3	0.3	0	0	70	70	7.32	37	0.04	21	3.74	4	5.35	NaN	NaN	NaN	NaN	NaN	NaN	NaN	NaN	NaN	NaN	NaN	NaN	NaN	NaN	NaN	NaN	NaN	NaN	NaN	NaN	NaN	NaN	NaN
97.5	80.9	0.3	0.3	0	0	70	70	7.31	37	0.04	21	3.74	4	5.35	NaN	NaN	NaN	NaN	NaN	NaN	NaN	NaN	NaN	NaN	NaN	NaN	NaN	NaN	NaN	NaN	NaN	NaN	NaN	NaN	NaN	NaN	NaN
97.75	80.9	0.3	0.3	0	0	70	70	7.31	37	0.04	21	3.74	4	5.35	NaN	NaN	NaN	NaN	NaN	NaN	NaN	NaN	NaN	NaN	NaN	NaN	NaN	NaN	NaN	NaN	NaN	NaN	NaN	NaN	NaN	NaN	NaN
98	80.5	0.3	0.3	0	0	70	70	7.31	37	0.04	21	3.74	4	5.35	NaN	NaN	NaN	NaN	NaN	NaN	NaN	NaN	NaN	NaN	NaN	NaN	NaN	NaN	NaN	NaN	NaN	NaN	NaN	NaN	NaN	NaN	NaN
98.25	79.8	0.3	0.3	0	0	70	70	7.3	37	0.04	21	3.74	4	5.35	NaN	NaN	NaN	NaN	NaN	NaN	NaN	NaN	NaN	NaN	NaN	NaN	NaN	NaN	NaN	NaN	NaN	NaN	NaN	NaN	NaN	NaN	NaN
98.5	80.1	0.3	0.3	0	0	70	70	7.3	37	0.04	21	3.74	4	5.35	NaN	NaN	NaN	NaN	NaN	NaN	NaN	NaN	NaN	NaN	NaN	NaN	NaN	NaN	NaN	NaN	NaN	NaN	NaN	NaN	NaN	NaN	NaN
98.75	80.1	0.3	0.3	0	0	70	70	7.3	37	0.04	21	3.74	4	5.35	NaN	NaN	NaN	NaN	NaN	NaN	NaN	NaN	NaN	NaN	NaN	NaN	NaN	NaN	NaN	NaN	NaN	NaN	NaN	NaN	NaN	NaN	NaN
99	80.2	0.3	0.3	0	0	70	70	7.29	37	0.04	21	3.74	4	5.35	NaN	NaN	NaN	NaN	NaN	NaN	NaN	NaN	NaN	NaN	NaN	NaN	NaN	NaN	NaN	NaN	NaN	NaN	NaN	NaN	NaN	NaN	NaN
99.25	79.8	0	0	0	0	70	70	7.3	36.8	0	0	3.74	4	5.35	NaN	NaN	NaN	NaN	NaN	NaN	NaN	NaN	NaN	NaN	NaN	NaN	NaN	NaN	NaN	NaN	NaN	NaN	NaN	NaN	NaN	NaN	NaN
99.5	107.2	0.29	0.27	0.01	0	70	70	7.51	35.3	4.61	21	3.74	4	5.35	NaN	NaN	NaN	NaN	NaN	NaN	NaN	NaN	NaN	NaN	NaN	NaN	NaN	NaN	NaN	NaN	NaN	NaN	NaN	NaN	NaN	NaN	NaN
99.75	101.7	0.3	0.28	0.01	0	70	70	7.47	38.1	4.43	21	3.74	4	5.35	NaN	NaN	NaN	NaN	NaN	NaN	NaN	NaN	NaN	NaN	NaN	NaN	NaN	NaN	NaN	NaN	NaN	NaN	NaN	NaN	NaN	NaN	NaN
100	94.6	0.3	0.28	0.02	0	70	70	7.47	37.1	5.19	21	3.74	4	5.35	NaN	NaN	NaN	NaN	NaN	NaN	NaN	NaN	NaN	NaN	NaN	NaN	NaN	NaN	NaN	NaN	NaN	NaN	NaN	NaN	NaN	NaN	NaN
100.25	89.5	0.3	0.28	0.02	0	70	70	7.45	36.9	5.36	21	3.74	4	5.35	NaN	NaN	NaN	NaN	NaN	NaN	NaN	NaN	NaN	NaN	NaN	NaN	NaN	NaN	NaN	NaN	NaN	NaN	NaN	NaN	NaN	NaN	NaN
100.5	86.3	0.3	0.28	0.02	0	70	70	7.42	37.1	5.22	21	3.74	4	5.35	NaN	NaN	NaN	NaN	NaN	NaN	NaN	NaN	NaN	NaN	NaN	NaN	NaN	NaN	NaN	NaN	NaN	NaN	NaN	NaN	NaN	NaN	NaN
100.75	83.6	0.3	0.28	0.02	0	70	70	7.41	37.2	5.26	21	3.74	4	5.35	NaN	NaN	NaN	NaN	NaN	NaN	NaN	NaN	NaN	NaN	NaN	NaN	NaN	NaN	NaN	NaN	NaN	NaN	NaN	NaN	NaN	NaN	NaN
101	82.5	0.3	0.28	0.01	0	70	70	7.38	37.1	4.85	21	3.74	4	5.35	NaN	NaN	NaN	NaN	NaN	NaN	NaN	NaN	NaN	NaN	NaN	NaN	NaN	NaN	NaN	NaN	NaN	NaN	NaN	NaN	NaN	NaN	NaN
101.25	80.7	0.3	0.28	0.01	0	70	70	7.36	37.1	4.55	21	3.74	4	5.35	NaN	NaN	NaN	NaN	NaN	NaN	NaN	NaN	NaN	NaN	NaN	NaN	NaN	NaN	NaN	NaN	NaN	NaN	NaN	NaN	NaN	NaN	NaN
101.5	80.8	0.3	0.3	0	0	70	70	7.35	37.1	0.04	21	3.74	4	5.35	NaN	NaN	NaN	NaN	NaN	NaN	NaN	NaN	NaN	NaN	NaN	NaN	NaN	NaN	NaN	NaN	NaN	NaN	NaN	NaN	NaN	NaN	NaN
101.75	79.7	0.3	0.3	0	0	70	70	7.34	37.1	0.04	21	3.74	4	5.35	NaN	NaN	NaN	NaN	NaN	NaN	NaN	NaN	NaN	NaN	NaN	NaN	NaN	NaN	NaN	NaN	NaN	NaN	NaN	NaN	NaN	NaN	NaN
102	78.6	0.3	0.3	0	0	70	70	7.34	37.1	0.04	21	3.74	4	5.35	NaN	NaN	NaN	NaN	NaN	NaN	NaN	NaN	NaN	NaN	NaN	NaN	NaN	NaN	NaN	NaN	NaN	NaN	NaN	NaN	NaN	NaN	NaN
102.25	77.8	0.3	0.3	0	0	70	70	7.34	37.1	0.04	21	3.74	4	5.35	NaN	NaN	NaN	NaN	NaN	NaN	NaN	NaN	NaN	NaN	NaN	NaN	NaN	NaN	NaN	NaN	NaN	NaN	NaN	NaN	NaN	NaN	NaN
102.5	77.1	0.3	0.3	0	0	70	70	7.35	37.1	0.04	21	3.74	4	5.35	NaN	NaN	NaN	NaN	NaN	NaN	NaN	NaN	NaN	NaN	NaN	NaN	NaN	NaN	NaN	NaN	NaN	NaN	NaN	NaN	NaN	NaN	NaN
102.75	76.7	0.3	0.3	0	0	70	70	7.35	37.1	0.04	21	3.74	4	5.35	NaN	NaN	NaN	NaN	NaN	NaN	NaN	NaN	NaN	NaN	NaN	NaN	NaN	NaN	NaN	NaN	NaN	NaN	NaN	NaN	NaN	NaN	NaN
103	75.8	0.3	0.3	0	0	70	70	7.35	37.1	0.1	21	3.74	4	5.35	NaN	NaN	NaN	NaN	NaN	NaN	NaN	NaN	NaN	NaN	NaN	NaN	NaN	NaN	NaN	NaN	NaN	NaN	NaN	NaN	NaN	NaN	NaN
103.25	74.4	0.3	0.3	0	0	70	70	7.35	37.1	0.16	21	3.74	4	5.35	NaN	NaN	NaN	NaN	NaN	NaN	NaN	NaN	NaN	NaN	NaN	NaN	NaN	NaN	NaN	NaN	NaN	NaN	NaN	NaN	NaN	NaN	NaN
103.5	73.7	0.3	0.3	0	0	70	70	7.36	37.1	0.26	21	3.74	4	5.35	NaN	NaN	NaN	NaN	NaN	NaN	NaN	NaN	NaN	NaN	NaN	NaN	NaN	NaN	NaN	NaN	NaN	NaN	NaN	NaN	NaN	NaN	NaN
103.75	73.1	0.3	0.3	0	0	70	70	7.36	37.1	0.4	21	3.74	4	5.35	NaN	NaN	NaN	NaN	NaN	NaN	NaN	NaN	NaN	NaN	NaN	NaN	NaN	NaN	NaN	NaN	NaN	NaN	NaN	NaN	NaN	NaN	NaN
104	73.5	0.3	0.3	0	0	70	70	7.36	37.1	0.6	21	3.74	4	5.35	NaN	NaN	NaN	NaN	NaN	NaN	NaN	NaN	NaN	NaN	NaN	NaN	NaN	NaN	NaN	NaN	NaN	NaN	NaN	NaN	NaN	NaN	NaN
104.25	73.8	0.3	0.3	0	0	70	70	7.37	37.1	0.79	21	3.74	4	5.35	NaN	NaN	NaN	NaN	NaN	NaN	NaN	NaN	NaN	NaN	NaN	NaN	NaN	NaN	NaN	NaN	NaN	NaN	NaN	NaN	NaN	NaN	NaN
104.5	73.8	0.3	0.29	0	0	70	70	7.37	37.1	0.99	21	3.74	4	5.35	NaN	NaN	NaN	NaN	NaN	NaN	NaN	NaN	NaN	NaN	NaN	NaN	NaN	NaN	NaN	NaN	NaN	NaN	NaN	NaN	NaN	NaN	NaN
104.75	73.3	0.3	0.29	0	0	70	70	7.36	37	0.86	21	3.74	4	5.35	NaN	NaN	NaN	NaN	NaN	NaN	NaN	NaN	NaN	NaN	NaN	NaN	NaN	NaN	NaN	NaN	NaN	NaN	NaN	NaN	NaN	NaN	NaN
105	71.4	0.3	0.3	0	0	70	70	7.35	37	0.04	21	3.74	4	5.35	NaN	NaN	NaN	NaN	NaN	NaN	NaN	NaN	NaN	NaN	NaN	NaN	NaN	NaN	NaN	NaN	NaN	NaN	NaN	NaN	NaN	NaN	NaN
105.25	70.1	0.3	0.3	0	0	70	70	7.35	37	0.04	21	3.74	4	5.35	NaN	NaN	NaN	NaN	NaN	NaN	NaN	NaN	NaN	NaN	NaN	NaN	NaN	NaN	NaN	NaN	NaN	NaN	NaN	NaN	NaN	NaN	NaN
105.5	69.4	0.3	0.3	0	0	70	70	7.34	37	0.04	21	3.74	4	5.35	NaN	NaN	NaN	NaN	NaN	NaN	NaN	NaN	NaN	NaN	NaN	NaN	NaN	NaN	NaN	NaN	NaN	NaN	NaN	NaN	NaN	NaN	NaN
105.75	69.2	0.3	0.3	0	0	70	70	7.34	37	0.04	21	3.74	4	5.35	NaN	NaN	NaN	NaN	NaN	NaN	NaN	NaN	NaN	NaN	NaN	NaN	NaN	NaN	NaN	NaN	NaN	NaN	NaN	NaN	NaN	NaN	NaN
106	67.5	0.3	0.3	0	0	70	70	7.34	37	0.04	21	3.74	4	5.35	NaN	NaN	NaN	NaN	NaN	NaN	NaN	NaN	NaN	NaN	NaN	NaN	NaN	NaN	NaN	NaN	NaN	NaN	NaN	NaN	NaN	NaN	NaN
106.25	66.9	0.3	0.3	0	0	70	70	7.34	37	0.04	21	3.74	4	5.35	NaN	NaN	NaN	NaN	NaN	NaN	NaN	NaN	NaN	NaN	NaN	NaN	NaN	NaN	NaN	NaN	NaN	NaN	NaN	NaN	NaN	NaN	NaN
106.5	66.4	0.3	0.3	0	0	70	70	7.34	37	0.04	21	3.74	4	5.35	NaN	NaN	NaN	NaN	NaN	NaN	NaN	NaN	NaN	NaN	NaN	NaN	NaN	NaN	NaN	NaN	NaN	NaN	NaN	NaN	NaN	NaN	NaN
106.75	66.3	0.3	0.3	0	0	70	70	7.34	37	0.04	21	3.74	4	5.35	NaN	NaN	NaN	NaN	NaN	NaN	NaN	NaN	NaN	NaN	NaN	NaN	NaN	NaN	NaN	NaN	NaN	NaN	NaN	NaN	NaN	NaN	NaN
107	66.5	0.3	0.3	0	0	70	70	7.34	37	0.04	21	3.74	4	5.35	NaN	NaN	NaN	NaN	NaN	NaN	NaN	NaN	NaN	NaN	NaN	NaN	NaN	NaN	NaN	NaN	NaN	NaN	NaN	NaN	NaN	NaN	NaN
107.25	65.9	0.3	0.3	0	0	70	70	7.34	37	0.04	21	3.74	4	5.35	NaN	NaN	NaN	NaN	NaN	NaN	NaN	NaN	NaN	NaN	NaN	NaN	NaN	NaN	NaN	NaN	NaN	NaN	NaN	NaN	NaN	NaN	NaN
107.5	65.7	0.3	0.3	0	0	70	70	7.34	37	0.04	21	3.74	4	5.35	NaN	NaN	NaN	NaN	NaN	NaN	NaN	NaN	NaN	NaN	NaN	NaN	NaN	NaN	NaN	NaN	NaN	NaN	NaN	NaN	NaN	NaN	NaN
107.75	65.9	0.3	0.3	0	0	70	70	7.34	37	0.04	21	3.74	4	5.35	NaN	NaN	NaN	NaN	NaN	NaN	NaN	NaN	NaN	NaN	NaN	NaN	NaN	NaN	NaN	NaN	NaN	NaN	NaN	NaN	NaN	NaN	NaN
108	66.8	0.3	0.3	0	0	70	70	7.34	37	0.04	21	3.74	4	5.35	NaN	NaN	NaN	NaN	NaN	NaN	NaN	NaN	NaN	NaN	NaN	NaN	NaN	NaN	NaN	NaN	NaN	NaN	NaN	NaN	NaN	NaN	NaN
108.25	66.5	0.3	0.3	0	0	70	70	7.34	37	0.04	21	3.74	4	5.35	NaN	NaN	NaN	NaN	NaN	NaN	NaN	NaN	NaN	NaN	NaN	NaN	NaN	NaN	NaN	NaN	NaN	NaN	NaN	NaN	NaN	NaN	NaN
108.5	65.6	0.3	0.3	0	0	70	70	7.34	37	0.04	21	3.74	4	5.35	NaN	NaN	NaN	NaN	NaN	NaN	NaN	NaN	NaN	NaN	NaN	NaN	NaN	NaN	NaN	NaN	NaN	NaN	NaN	NaN	NaN	NaN	NaN
108.75	65.4	0.3	0.3	0	0	70	70	7.34	37	0.04	21	3.74	4	5.35	NaN	NaN	NaN	NaN	NaN	NaN	NaN	NaN	NaN	NaN	NaN	NaN	NaN	NaN	NaN	NaN	NaN	NaN	NaN	NaN	NaN	NaN	NaN
109	65.7	0.3	0.3	0	0	70	70	7.33	37	0.04	21	3.74	4	5.35	NaN	NaN	NaN	NaN	NaN	NaN	NaN	NaN	NaN	NaN	NaN	NaN	NaN	NaN	NaN	NaN	NaN	NaN	NaN	NaN	NaN	NaN	NaN
109.25	66.1	0.3	0.3	0	0	70	70	7.33	37	0.04	21	3.74	4	5.35	NaN	NaN	NaN	NaN	NaN	NaN	NaN	NaN	NaN	NaN	NaN	NaN	NaN	NaN	NaN	NaN	NaN	NaN	NaN	NaN	NaN	NaN	NaN
109.5	64.8	0.3	0.3	0	0	70	70	7.33	37	0.04	21	3.74	4	5.35	NaN	NaN	NaN	NaN	NaN	NaN	NaN	NaN	NaN	NaN	NaN	NaN	NaN	NaN	NaN	NaN	NaN	NaN	NaN	NaN	NaN	NaN	NaN
109.75	64.4	0.3	0.3	0	0	70	70	7.33	37	0.04	21	3.74	4	5.35	NaN	NaN	NaN	NaN	NaN	NaN	NaN	NaN	NaN	NaN	NaN	NaN	NaN	NaN	NaN	NaN	NaN	NaN	NaN	NaN	NaN	NaN	NaN
110	64	0.3	0.3	0	0	70	70	7.32	37	0.04	21	3.74	4	5.35	NaN	NaN	NaN	NaN	NaN	NaN	NaN	NaN	NaN	NaN	NaN	NaN	NaN	NaN	NaN	NaN	NaN	NaN	NaN	NaN	NaN	NaN	NaN
110.25	64.3	0.3	0.3	0	0	70	70	7.32	37	0.04	21	3.74	4	5.35	NaN	NaN	NaN	NaN	NaN	NaN	NaN	NaN	NaN	NaN	NaN	NaN	NaN	NaN	NaN	NaN	NaN	NaN	NaN	NaN	NaN	NaN	NaN
110.5	63.3	0.3	0.3	0	0	70	70	7.32	37	0.04	21	3.74	4	5.35	NaN	NaN	NaN	NaN	NaN	NaN	NaN	NaN	NaN	NaN	NaN	NaN	NaN	NaN	NaN	NaN	NaN	NaN	NaN	NaN	NaN	NaN	NaN
110.75	62.6	0.3	0.3	0	0	70	70	7.31	37	0.04	21	3.74	4	5.35	NaN	NaN	NaN	NaN	NaN	NaN	NaN	NaN	NaN	NaN	NaN	NaN	NaN	NaN	NaN	NaN	NaN	NaN	NaN	NaN	NaN	NaN	NaN
111	61.9	0.3	0.3	0	0	70	70	7.31	37	0.04	21	3.74	4	5.35	NaN	NaN	NaN	NaN	NaN	NaN	NaN	NaN	NaN	NaN	NaN	NaN	NaN	NaN	NaN	NaN	NaN	NaN	NaN	NaN	NaN	NaN	NaN
111.25	60.9	0.3	0.3	0	0	70	70	7.3	37	0.04	21	3.74	4	5.35	NaN	NaN	NaN	NaN	NaN	NaN	NaN	NaN	NaN	NaN	NaN	NaN	NaN	NaN	NaN	NaN	NaN	NaN	NaN	NaN	NaN	NaN	NaN
111.5	60.7	0.3	0.3	0	0	70	70	7.3	37	0.04	21	3.74	4	5.35	NaN	NaN	NaN	NaN	NaN	NaN	NaN	NaN	NaN	NaN	NaN	NaN	NaN	NaN	NaN	NaN	NaN	NaN	NaN	NaN	NaN	NaN	NaN
111.75	60.6	0.3	0.3	0	0	70	70	7.29	37	0.04	21	3.74	4	5.35	NaN	NaN	NaN	NaN	NaN	NaN	NaN	NaN	NaN	NaN	NaN	NaN	NaN	NaN	NaN	NaN	NaN	NaN	NaN	NaN	NaN	NaN	NaN
112	60.5	0.3	0.3	0	0	70	70	7.29	37	0.04	21	3.74	4	5.35	NaN	NaN	NaN	NaN	NaN	NaN	NaN	NaN	NaN	NaN	NaN	NaN	NaN	NaN	NaN	NaN	NaN	NaN	NaN	NaN	NaN	NaN	NaN
112.25	59.4	0.3	0.3	0	0	70	70	7.28	37	0.04	21	3.74	4	5.35	NaN	NaN	NaN	NaN	NaN	NaN	NaN	NaN	NaN	NaN	NaN	NaN	NaN	NaN	NaN	NaN	NaN	NaN	NaN	NaN	NaN	NaN	NaN
112.5	58	0.3	0.3	0	0	70	70	7.28	37	0.04	21	3.74	4	5.35	NaN	NaN	NaN	NaN	NaN	NaN	NaN	NaN	NaN	NaN	NaN	NaN	NaN	NaN	NaN	NaN	NaN	NaN	NaN	NaN	NaN	NaN	NaN
112.75	58.4	0.3	0.3	0	0	70	70	7.27	37	0.04	21	3.74	4	5.35	NaN	NaN	NaN	NaN	NaN	NaN	NaN	NaN	NaN	NaN	NaN	NaN	NaN	NaN	NaN	NaN	NaN	NaN	NaN	NaN	NaN	NaN	NaN
113	58.1	0.3	0.3	0	0	70	70	7.27	37	0.04	21	3.74	4	5.35	NaN	NaN	NaN	NaN	NaN	NaN	NaN	NaN	NaN	NaN	NaN	NaN	NaN	NaN	NaN	NaN	NaN	NaN	NaN	NaN	NaN	NaN	NaN
113.25	56.8	0.3	0.3	0	0	70	70	7.26	37	0.04	21	3.74	4	5.35	NaN	NaN	NaN	NaN	NaN	NaN	NaN	NaN	NaN	NaN	NaN	NaN	NaN	NaN	NaN	NaN	NaN	NaN	NaN	NaN	NaN	NaN	NaN
113.5	56.5	0.3	0.3	0	0	70	70	7.26	37	0.04	21	3.74	4	5.35	NaN	NaN	NaN	NaN	NaN	NaN	NaN	NaN	NaN	NaN	NaN	NaN	NaN	NaN	NaN	NaN	NaN	NaN	NaN	NaN	NaN	NaN	NaN
113.75	56.7	0.3	0.3	0	0	70	70	7.25	37	0.04	21	3.74	4	5.35	NaN	NaN	NaN	NaN	NaN	NaN	NaN	NaN	NaN	NaN	NaN	NaN	NaN	NaN	NaN	NaN	NaN	NaN	NaN	NaN	NaN	NaN	NaN
114	57.5	0.3	0.3	0	0	70	70	7.25	37	0.04	21	3.74	4	5.35	NaN	NaN	NaN	NaN	NaN	NaN	NaN	NaN	NaN	NaN	NaN	NaN	NaN	NaN	NaN	NaN	NaN	NaN	NaN	NaN	NaN	NaN	NaN
114.25	57.9	0.3	0.3	0	0	70	70	7.25	37	0.04	21	3.74	4	5.35	NaN	NaN	NaN	NaN	NaN	NaN	NaN	NaN	NaN	NaN	NaN	NaN	NaN	NaN	NaN	NaN	NaN	NaN	NaN	NaN	NaN	NaN	NaN
114.5	56.7	0.3	0.3	0	0	70	70	7.24	37	0.04	21	3.74	4	5.35	NaN	NaN	NaN	NaN	NaN	NaN	NaN	NaN	NaN	NaN	NaN	NaN	NaN	NaN	NaN	NaN	NaN	NaN	NaN	NaN	NaN	NaN	NaN
114.75	56.5	0.3	0.3	0	0	70	70	7.24	37	0.04	21	3.74	4	5.35	NaN	NaN	NaN	NaN	NaN	NaN	NaN	NaN	NaN	NaN	NaN	NaN	NaN	NaN	NaN	NaN	NaN	NaN	NaN	NaN	NaN	NaN	NaN
115	57.4	0.3	0.3	0	0	70	70	7.23	37	0.04	21	3.74	4	5.35	NaN	NaN	NaN	NaN	NaN	NaN	NaN	NaN	NaN	NaN	NaN	NaN	NaN	NaN	NaN	NaN	NaN	NaN	NaN	NaN	NaN	NaN	NaN
115.25	58.4	0.3	0.3	0	0	70	70	7.23	37	0.04	21	3.74	4	5.35	NaN	NaN	NaN	NaN	NaN	NaN	NaN	NaN	NaN	NaN	NaN	NaN	NaN	NaN	NaN	NaN	NaN	NaN	NaN	NaN	NaN	NaN	NaN
115.5	59	0.3	0.3	0	0	70	70	7.23	37	0.04	21	3.74	4	5.35	NaN	NaN	NaN	NaN	NaN	NaN	NaN	NaN	NaN	NaN	NaN	NaN	NaN	NaN	NaN	NaN	NaN	NaN	NaN	NaN	NaN	NaN	NaN
115.75	58.7	0.3	0.3	0	0	70	70	7.25	37	0.04	21	3.74	4	5.35	NaN	NaN	NaN	NaN	NaN	NaN	NaN	NaN	NaN	NaN	NaN	NaN	NaN	NaN	NaN	NaN	NaN	NaN	NaN	NaN	NaN	NaN	NaN
116	58.4	0.3	0.3	0	0	70	70	7.25	37	0.04	21	3.74	4	5.35	NaN	NaN	NaN	NaN	NaN	NaN	NaN	NaN	NaN	NaN	NaN	NaN	NaN	NaN	NaN	NaN	NaN	NaN	NaN	NaN	NaN	NaN	NaN
116.25	58	0.3	0.3	0	0	70	70	7.25	37	0.04	21	3.74	4	5.35	NaN	NaN	NaN	NaN	NaN	NaN	NaN	NaN	NaN	NaN	NaN	NaN	NaN	NaN	NaN	NaN	NaN	NaN	NaN	NaN	NaN	NaN	NaN
116.5	56	0.3	0.3	0	0	70	70	7.25	37	0.04	21	3.74	4	5.35	NaN	NaN	NaN	NaN	NaN	NaN	NaN	NaN	NaN	NaN	NaN	NaN	NaN	NaN	NaN	NaN	NaN	NaN	NaN	NaN	NaN	NaN	NaN
116.75	54.5	0.3	0.3	0	0	70	70	7.24	37	0.04	21	3.74	4	5.35	NaN	NaN	NaN	NaN	NaN	NaN	NaN	NaN	NaN	NaN	NaN	NaN	NaN	NaN	NaN	NaN	NaN	NaN	NaN	NaN	NaN	NaN	NaN
117	53.8	0.3	0.3	0	0	70	70	7.25	37	0.04	21	3.74	4	5.35	650	2.19	1.4235	0	1	2	0.885	0.0421429	740000	534167	1.65679e-06	3.8821	188	1.96	21.952	2.63488	44.4301	0.0156099	NaN	NaN	NaN	NaN	NaN
117.25	53.2	0.3	0.3	0	0	70	70	7.24	37	0.04	21	3.74	4	5.35	NaN	NaN	NaN	NaN	NaN	NaN	NaN	NaN	NaN	NaN	NaN	NaN	NaN	NaN	NaN	NaN	NaN	NaN	NaN	NaN	NaN	NaN	NaN
117.5	53.4	0.3	0.3	0	0	70	70	7.25	37	0.04	21	3.74	4	5.35	NaN	NaN	NaN	NaN	NaN	NaN	NaN	NaN	NaN	NaN	NaN	NaN	NaN	NaN	NaN	NaN	NaN	NaN	NaN	NaN	NaN	NaN	NaN
117.75	52.3	0.3	0.3	0	0	70	70	7.24	37	0.04	21	3.74	4	5.35	NaN	NaN	NaN	NaN	NaN	NaN	NaN	NaN	NaN	NaN	NaN	NaN	NaN	NaN	NaN	NaN	NaN	NaN	NaN	NaN	NaN	NaN	NaN
118	52.5	0.3	0.3	0	0	70	70	7.25	37	0.04	21	3.74	4	5.35	NaN	NaN	NaN	NaN	NaN	NaN	NaN	NaN	NaN	NaN	NaN	NaN	NaN	NaN	NaN	NaN	NaN	NaN	NaN	NaN	NaN	NaN	NaN
118.25	53.2	0.3	0.3	0	0	70	70	7.25	37	0.04	21	3.74	4	5.35	NaN	NaN	NaN	NaN	NaN	NaN	NaN	NaN	NaN	NaN	NaN	NaN	NaN	NaN	NaN	NaN	NaN	NaN	NaN	NaN	NaN	NaN	NaN
118.5	54.3	0.3	0.3	0	0	70	70	7.25	37	0.04	21	3.74	4	5.35	NaN	NaN	NaN	NaN	NaN	NaN	NaN	NaN	NaN	NaN	NaN	NaN	NaN	NaN	NaN	NaN	NaN	NaN	NaN	NaN	NaN	NaN	NaN
118.75	54.4	0.3	0.3	0	0	70	70	7.25	37	0.04	21	3.74	4	5.35	NaN	NaN	NaN	NaN	NaN	NaN	NaN	NaN	NaN	NaN	NaN	NaN	NaN	NaN	NaN	NaN	NaN	NaN	NaN	NaN	NaN	NaN	NaN
119	54.5	0.3	0.3	0	0	70	70	7.25	37	0.04	21	3.74	4	5.35	NaN	NaN	NaN	NaN	NaN	NaN	NaN	NaN	NaN	NaN	NaN	NaN	NaN	NaN	NaN	NaN	NaN	NaN	NaN	NaN	NaN	NaN	NaN
119.25	54.6	0.3	0.3	0	0	70	70	7.25	37	0.04	21	3.74	4	5.35	NaN	NaN	NaN	NaN	NaN	NaN	NaN	NaN	NaN	NaN	NaN	NaN	NaN	NaN	NaN	NaN	NaN	NaN	NaN	NaN	NaN	NaN	NaN
119.5	54.9	0.3	0.3	0	0	70	70	7.25	37	0.04	21	3.74	4	5.35	NaN	NaN	NaN	NaN	NaN	NaN	NaN	NaN	NaN	NaN	NaN	NaN	NaN	NaN	NaN	NaN	NaN	NaN	NaN	NaN	NaN	NaN	NaN
119.75	54.6	0.3	0.3	0	0	70	70	7.25	37	0.04	21	3.74	4	5.35	NaN	NaN	NaN	NaN	NaN	NaN	NaN	NaN	NaN	NaN	NaN	NaN	NaN	NaN	NaN	NaN	NaN	NaN	NaN	NaN	NaN	NaN	NaN
0	128.522	0.149	0.124828	0.039108	0.0103958	80	80	7.47	33.719	12.561	21	3.85	4	3.12	700	3.57	2.5	0	2.5	3.57	0	0	51600	51600	0	0	0	0	0	0	0	0	1.586	1.586	0	0	5
0.25	125.495	0.296	0.247563	0.0395129	0.0105034	80	80	7.476	38.29	13.152	21	3.85	4	3.12	NaN	NaN	NaN	NaN	NaN	NaN	NaN	NaN	NaN	NaN	NaN	NaN	NaN	NaN	NaN	NaN	NaN	NaN	NaN	NaN	NaN	NaN	NaN
0.5	125.839	0.299	0.248412	0.0397587	0.0105688	80	80	7.461	36.811	13.48	21	3.85	4	3.12	NaN	NaN	NaN	NaN	NaN	NaN	NaN	NaN	NaN	NaN	NaN	NaN	NaN	NaN	NaN	NaN	NaN	NaN	NaN	NaN	NaN	NaN	NaN
0.75	122.826	0.299	0.247133	0.0407806	0.0108404	80	80	7.44	36.418	13.649	21	3.85	4	3.12	NaN	NaN	NaN	NaN	NaN	NaN	NaN	NaN	NaN	NaN	NaN	NaN	NaN	NaN	NaN	NaN	NaN	NaN	NaN	NaN	NaN	NaN	NaN
1	122.083	0.299	0.248624	0.0402305	0.0106942	80	80	7.413	38.009	13.31	21	3.85	4	3.12	NaN	NaN	NaN	NaN	NaN	NaN	NaN	NaN	NaN	NaN	NaN	NaN	NaN	NaN	NaN	NaN	NaN	NaN	NaN	NaN	NaN	NaN	NaN
1.25	123.393	0.3	0.248654	0.0361923	0.00962074	80	80	7.398	36.682	13.317	21	3.85	4	3.12	NaN	NaN	NaN	NaN	NaN	NaN	NaN	NaN	NaN	NaN	NaN	NaN	NaN	NaN	NaN	NaN	NaN	NaN	NaN	NaN	NaN	NaN	NaN
1.5	122.819	0.299	0.249521	0.0387288	0.010295	80	80	7.374	36.61	13.073	21	3.85	4	3.12	NaN	NaN	NaN	NaN	NaN	NaN	NaN	NaN	NaN	NaN	NaN	NaN	NaN	NaN	NaN	NaN	NaN	NaN	NaN	NaN	NaN	NaN	NaN
1.75	120.645	0.299	0.298856	0.037665	0.0100122	80	80	7.351	37.468	0.038	21	3.85	4	3.12	NaN	NaN	NaN	NaN	NaN	NaN	NaN	NaN	NaN	NaN	NaN	NaN	NaN	NaN	NaN	NaN	NaN	NaN	NaN	NaN	NaN	NaN	NaN
2	120.494	0.299	0.298712	0.00023244	6.17878e-05	80	80	7.351	37.171	0.05	21	3.85	4	3.12	NaN	NaN	NaN	NaN	NaN	NaN	NaN	NaN	NaN	NaN	NaN	NaN	NaN	NaN	NaN	NaN	NaN	NaN	NaN	NaN	NaN	NaN	NaN
2.25	119.448	0.299	0.297505	0.00128271	0.000340974	80	80	7.367	36.648	0.483	21	3.85	4	3.12	NaN	NaN	NaN	NaN	NaN	NaN	NaN	NaN	NaN	NaN	NaN	NaN	NaN	NaN	NaN	NaN	NaN	NaN	NaN	NaN	NaN	NaN	NaN
2.5	118.897	0.298	0.295276	0.00261027	0.000693869	80	80	7.379	36.996	0.953	21	3.85	4	3.12	NaN	NaN	NaN	NaN	NaN	NaN	NaN	NaN	NaN	NaN	NaN	NaN	NaN	NaN	NaN	NaN	NaN	NaN	NaN	NaN	NaN	NaN	NaN
2.75	117.856	0.299	0.29291	0.00489584	0.00130143	80	80	7.395	37.212	1.644	21	3.85	4	3.12	NaN	NaN	NaN	NaN	NaN	NaN	NaN	NaN	NaN	NaN	NaN	NaN	NaN	NaN	NaN	NaN	NaN	NaN	NaN	NaN	NaN	NaN	NaN
3	117.061	0.299	0.291078	0.00647634	0.00172156	80	80	7.409	36.965	2.179	21	3.85	4	3.12	NaN	NaN	NaN	NaN	NaN	NaN	NaN	NaN	NaN	NaN	NaN	NaN	NaN	NaN	NaN	NaN	NaN	NaN	NaN	NaN	NaN	NaN	NaN
3.25	117.578	0.299	0.286911	0.008868	0.00235732	80	80	7.428	36.862	3.136	21	3.85	4	3.12	NaN	NaN	NaN	NaN	NaN	NaN	NaN	NaN	NaN	NaN	NaN	NaN	NaN	NaN	NaN	NaN	NaN	NaN	NaN	NaN	NaN	NaN	NaN
3.5	116.829	0.282	0.266975	0.012819	0.00340758	80	80	7.446	37.028	4.32	21	3.85	4	3.12	NaN	NaN	NaN	NaN	NaN	NaN	NaN	NaN	NaN	NaN	NaN	NaN	NaN	NaN	NaN	NaN	NaN	NaN	NaN	NaN	NaN	NaN	NaN
3.75	117.132	0.299	0.280386	0.0149141	0.00396451	80	80	7.458	37.103	5.104	21	3.85	4	3.12	NaN	NaN	NaN	NaN	NaN	NaN	NaN	NaN	NaN	NaN	NaN	NaN	NaN	NaN	NaN	NaN	NaN	NaN	NaN	NaN	NaN	NaN	NaN
4	117.288	0.299	0.275932	0.017638	0.00468858	80	80	7.466	37.009	6.095	21	3.85	4	3.12	NaN	NaN	NaN	NaN	NaN	NaN	NaN	NaN	NaN	NaN	NaN	NaN	NaN	NaN	NaN	NaN	NaN	NaN	NaN	NaN	NaN	NaN	NaN
4.25	116.244	0.3	0.273862	0.0207267	0.00550962	80	80	7.472	36.942	6.932	21	3.85	4	3.12	NaN	NaN	NaN	NaN	NaN	NaN	NaN	NaN	NaN	NaN	NaN	NaN	NaN	NaN	NaN	NaN	NaN	NaN	NaN	NaN	NaN	NaN	NaN
4.5	117.185	0.3	0.270668	0.023328	0.00620111	80	80	7.473	36.985	7.752	21	3.85	4	3.12	NaN	NaN	NaN	NaN	NaN	NaN	NaN	NaN	NaN	NaN	NaN	NaN	NaN	NaN	NaN	NaN	NaN	NaN	NaN	NaN	NaN	NaN	NaN
4.75	117.331	0.306	0.274081	0.0249183	0.00662385	80	80	7.476	37.032	8.44	21	3.85	4	3.12	NaN	NaN	NaN	NaN	NaN	NaN	NaN	NaN	NaN	NaN	NaN	NaN	NaN	NaN	NaN	NaN	NaN	NaN	NaN	NaN	NaN	NaN	NaN
5	117.763	0.298	0.263632	0.0270834	0.00719939	80	80	7.47	37.037	9.037	21	3.85	4	3.12	NaN	NaN	NaN	NaN	NaN	NaN	NaN	NaN	NaN	NaN	NaN	NaN	NaN	NaN	NaN	NaN	NaN	NaN	NaN	NaN	NaN	NaN	NaN
5.25	118.619	0.299	0.262787	0.0285216	0.00758169	80	80	7.457	36.996	9.578	21	3.85	4	3.12	NaN	NaN	NaN	NaN	NaN	NaN	NaN	NaN	NaN	NaN	NaN	NaN	NaN	NaN	NaN	NaN	NaN	NaN	NaN	NaN	NaN	NaN	NaN
5.5	118.376	0.299	0.261247	0.0294665	0.00783285	80	80	7.447	36.99	9.975	21	3.85	4	3.12	NaN	NaN	NaN	NaN	NaN	NaN	NaN	NaN	NaN	NaN	NaN	NaN	NaN	NaN	NaN	NaN	NaN	NaN	NaN	NaN	NaN	NaN	NaN
5.75	118.799	0.299	0.260126	0.030849	0.00820037	80	80	7.438	36.958	10.227	21	3.85	4	3.12	NaN	NaN	NaN	NaN	NaN	NaN	NaN	NaN	NaN	NaN	NaN	NaN	NaN	NaN	NaN	NaN	NaN	NaN	NaN	NaN	NaN	NaN	NaN
6	118.801	0.284	0.244672	0.0311553	0.00828179	80	80	7.428	36.977	10.49	21	3.85	4	3.12	NaN	NaN	NaN	NaN	NaN	NaN	NaN	NaN	NaN	NaN	NaN	NaN	NaN	NaN	NaN	NaN	NaN	NaN	NaN	NaN	NaN	NaN	NaN
6.25	118.871	0.299	0.258529	0.0323968	0.0086118	80	80	7.42	36.97	10.692	21	3.85	4	3.12	NaN	NaN	NaN	NaN	NaN	NaN	NaN	NaN	NaN	NaN	NaN	NaN	NaN	NaN	NaN	NaN	NaN	NaN	NaN	NaN	NaN	NaN	NaN
6.5	119.364	0.299	0.258052	0.0321903	0.00855693	80	80	7.41	36.996	10.766	21	3.85	4	3.12	NaN	NaN	NaN	NaN	NaN	NaN	NaN	NaN	NaN	NaN	NaN	NaN	NaN	NaN	NaN	NaN	NaN	NaN	NaN	NaN	NaN	NaN	NaN
6.75	119.68	0.308	0.26924	0.0348189	0.00925565	80	80	7.396	37.02	10.847	21	3.85	4	3.12	NaN	NaN	NaN	NaN	NaN	NaN	NaN	NaN	NaN	NaN	NaN	NaN	NaN	NaN	NaN	NaN	NaN	NaN	NaN	NaN	NaN	NaN	NaN
7	122.22	0.299	0.258037	0.032538	0.00864934	80	80	7.386	37.024	10.846	21	3.85	4	3.12	NaN	NaN	NaN	NaN	NaN	NaN	NaN	NaN	NaN	NaN	NaN	NaN	NaN	NaN	NaN	NaN	NaN	NaN	NaN	NaN	NaN	NaN	NaN
7.25	122.013	0.299	0.258347	0.0302473	0.00804043	80	80	7.377	37.001	10.726	21	3.85	4	3.12	NaN	NaN	NaN	NaN	NaN	NaN	NaN	NaN	NaN	NaN	NaN	NaN	NaN	NaN	NaN	NaN	NaN	NaN	NaN	NaN	NaN	NaN	NaN
7.5	119.831	0.299	0.259176	0.0313705	0.00833898	80	80	7.361	36.983	10.542	21	3.85	4	3.12	NaN	NaN	NaN	NaN	NaN	NaN	NaN	NaN	NaN	NaN	NaN	NaN	NaN	NaN	NaN	NaN	NaN	NaN	NaN	NaN	NaN	NaN	NaN
7.75	119.618	0.299	0.259763	0.0308072	0.00818927	80	80	7.353	36.989	10.366	21	3.85	4	3.12	NaN	NaN	NaN	NaN	NaN	NaN	NaN	NaN	NaN	NaN	NaN	NaN	NaN	NaN	NaN	NaN	NaN	NaN	NaN	NaN	NaN	NaN	NaN
8	118.591	0.299	0.298856	0.00011362	3.02028e-05	80	80	7.348	36.986	0.038	21	3.85	4	3.12	NaN	NaN	NaN	NaN	NaN	NaN	NaN	NaN	NaN	NaN	NaN	NaN	NaN	NaN	NaN	NaN	NaN	NaN	NaN	NaN	NaN	NaN	NaN
8.25	117.379	0.299	0.297971	0.00098371	0.000261493	80	80	7.363	36.986	0.329	21	3.85	4	3.12	NaN	NaN	NaN	NaN	NaN	NaN	NaN	NaN	NaN	NaN	NaN	NaN	NaN	NaN	NaN	NaN	NaN	NaN	NaN	NaN	NaN	NaN	NaN
8.5	117.006	0.299	0.29531	0.00250562	0.000666051	80	80	7.38	36.983	0.975	21	3.85	4	3.12	NaN	NaN	NaN	NaN	NaN	NaN	NaN	NaN	NaN	NaN	NaN	NaN	NaN	NaN	NaN	NaN	NaN	NaN	NaN	NaN	NaN	NaN	NaN
8.75	116.193	0.299	0.292634	0.00534911	0.00142192	80	80	7.398	36.983	1.717	21	3.85	4	3.12	NaN	NaN	NaN	NaN	NaN	NaN	NaN	NaN	NaN	NaN	NaN	NaN	NaN	NaN	NaN	NaN	NaN	NaN	NaN	NaN	NaN	NaN	NaN
9	115.913	0.297	0.28849	0.00805374	0.00214087	80	80	7.419	36.981	2.658	21	3.85	4	3.12	NaN	NaN	NaN	NaN	NaN	NaN	NaN	NaN	NaN	NaN	NaN	NaN	NaN	NaN	NaN	NaN	NaN	NaN	NaN	NaN	NaN	NaN	NaN
9.25	119.656	0.318	0.304338	0.0105936	0.00281601	80	80	7.443	36.991	3.65	21	3.85	4	3.12	NaN	NaN	NaN	NaN	NaN	NaN	NaN	NaN	NaN	NaN	NaN	NaN	NaN	NaN	NaN	NaN	NaN	NaN	NaN	NaN	NaN	NaN	NaN
9.5	119.128	0.301	0.28358	0.013164	0.00349929	80	80	7.454	37.006	4.666	21	3.85	4	3.12	NaN	NaN	NaN	NaN	NaN	NaN	NaN	NaN	NaN	NaN	NaN	NaN	NaN	NaN	NaN	NaN	NaN	NaN	NaN	NaN	NaN	NaN	NaN
9.75	118.049	0.299	0.278687	0.0165881	0.0044095	80	80	7.462	37.013	5.558	21	3.85	4	3.12	NaN	NaN	NaN	NaN	NaN	NaN	NaN	NaN	NaN	NaN	NaN	NaN	NaN	NaN	NaN	NaN	NaN	NaN	NaN	NaN	NaN	NaN	NaN
10	117.019	0.299	0.275462	0.018651	0.00495786	80	80	7.467	37.011	6.313	21	3.85	4	3.12	NaN	NaN	NaN	NaN	NaN	NaN	NaN	NaN	NaN	NaN	NaN	NaN	NaN	NaN	NaN	NaN	NaN	NaN	NaN	NaN	NaN	NaN	NaN
10.25	116.284	0.299	0.272393	0.0205832	0.00547147	80	80	7.468	37.003	7.077	21	3.85	4	3.12	NaN	NaN	NaN	NaN	NaN	NaN	NaN	NaN	NaN	NaN	NaN	NaN	NaN	NaN	NaN	NaN	NaN	NaN	NaN	NaN	NaN	NaN	NaN
10.5	115.297	0.299	0.270288	0.0229752	0.00610732	80	80	7.463	36.993	7.659	21	3.85	4	3.12	NaN	NaN	NaN	NaN	NaN	NaN	NaN	NaN	NaN	NaN	NaN	NaN	NaN	NaN	NaN	NaN	NaN	NaN	NaN	NaN	NaN	NaN	NaN
10.75	115.226	0.299	0.268025	0.0246625	0.00655585	80	80	7.462	36.986	8.368	21	3.85	4	3.12	NaN	NaN	NaN	NaN	NaN	NaN	NaN	NaN	NaN	NaN	NaN	NaN	NaN	NaN	NaN	NaN	NaN	NaN	NaN	NaN	NaN	NaN	NaN
11	115.96	0.299	0.264986	0.0275278	0.00731751	80	80	7.46	36.997	9.034	21	3.85	4	3.12	NaN	NaN	NaN	NaN	NaN	NaN	NaN	NaN	NaN	NaN	NaN	NaN	NaN	NaN	NaN	NaN	NaN	NaN	NaN	NaN	NaN	NaN	NaN
11.25	118.164	0.299	0.263449	0.028209	0.00749859	80	80	7.453	36.991	9.393	21	3.85	4	3.12	NaN	NaN	NaN	NaN	NaN	NaN	NaN	NaN	NaN	NaN	NaN	NaN	NaN	NaN	NaN	NaN	NaN	NaN	NaN	NaN	NaN	NaN	NaN
11.5	117.53	0.297	0.260646	0.0291435	0.00774701	80	80	7.444	37.009	9.811	21	3.85	4	3.12	NaN	NaN	NaN	NaN	NaN	NaN	NaN	NaN	NaN	NaN	NaN	NaN	NaN	NaN	NaN	NaN	NaN	NaN	NaN	NaN	NaN	NaN	NaN
11.75	116.424	0.299	0.262363	0.0295412	0.00785272	80	80	7.428	37.002	9.969	21	3.85	4	3.12	NaN	NaN	NaN	NaN	NaN	NaN	NaN	NaN	NaN	NaN	NaN	NaN	NaN	NaN	NaN	NaN	NaN	NaN	NaN	NaN	NaN	NaN	NaN
12	118.671	0.299	0.261232	0.0305518	0.00812137	80	80	7.422	36.994	10.225	21	3.85	4	3.12	NaN	NaN	NaN	NaN	NaN	NaN	NaN	NaN	NaN	NaN	NaN	NaN	NaN	NaN	NaN	NaN	NaN	NaN	NaN	NaN	NaN	NaN	NaN
12.25	117.472	0.296	0.256631	0.0309495	0.00822708	80	80	7.41	37.005	10.264	21	3.85	4	3.12	NaN	NaN	NaN	NaN	NaN	NaN	NaN	NaN	NaN	NaN	NaN	NaN	NaN	NaN	NaN	NaN	NaN	NaN	NaN	NaN	NaN	NaN	NaN
12.5	119.656	0.299	0.259755	0.030954	0.00822828	80	80	7.398	37.014	10.339	21	3.85	4	3.12	NaN	NaN	NaN	NaN	NaN	NaN	NaN	NaN	NaN	NaN	NaN	NaN	NaN	NaN	NaN	NaN	NaN	NaN	NaN	NaN	NaN	NaN	NaN
12.75	118.399	0.299	0.2601	0.0304347	0.00809024	80	80	7.386	37.01	10.267	21	3.85	4	3.12	NaN	NaN	NaN	NaN	NaN	NaN	NaN	NaN	NaN	NaN	NaN	NaN	NaN	NaN	NaN	NaN	NaN	NaN	NaN	NaN	NaN	NaN	NaN
13	118.007	0.299	0.261182	0.0316316	0.0084084	80	80	7.375	37.005	10.233	21	3.85	4	3.12	NaN	NaN	NaN	NaN	NaN	NaN	NaN	NaN	NaN	NaN	NaN	NaN	NaN	NaN	NaN	NaN	NaN	NaN	NaN	NaN	NaN	NaN	NaN
13.25	119.428	0.3	0.262487	0.0302528	0.00804189	80	80	7.365	37.004	10.14	21	3.85	4	3.12	NaN	NaN	NaN	NaN	NaN	NaN	NaN	NaN	NaN	NaN	NaN	NaN	NaN	NaN	NaN	NaN	NaN	NaN	NaN	NaN	NaN	NaN	NaN
13.5	117.323	0.299	0.26242	0.029601	0.00786862	80	80	7.356	36.969	9.919	21	3.85	4	3.12	NaN	NaN	NaN	NaN	NaN	NaN	NaN	NaN	NaN	NaN	NaN	NaN	NaN	NaN	NaN	NaN	NaN	NaN	NaN	NaN	NaN	NaN	NaN
13.75	117.14	0.299	0.298856	0.00015249	4.05353e-05	80	80	7.352	36.967	0.05	21	3.85	4	3.12	NaN	NaN	NaN	NaN	NaN	NaN	NaN	NaN	NaN	NaN	NaN	NaN	NaN	NaN	NaN	NaN	NaN	NaN	NaN	NaN	NaN	NaN	NaN
14	116.472	0.299	0.297812	0.00075647	0.000201087	80	80	7.36	37.002	0.369	21	3.85	4	3.12	NaN	NaN	NaN	NaN	NaN	NaN	NaN	NaN	NaN	NaN	NaN	NaN	NaN	NaN	NaN	NaN	NaN	NaN	NaN	NaN	NaN	NaN	NaN
14.25	115.903	0.299	0.296108	0.00249366	0.000662872	80	80	7.373	37.017	0.866	21	3.85	4	3.12	NaN	NaN	NaN	NaN	NaN	NaN	NaN	NaN	NaN	NaN	NaN	NaN	NaN	NaN	NaN	NaN	NaN	NaN	NaN	NaN	NaN	NaN	NaN
14.5	115.287	0.299	0.293796	0.00444613	0.00118188	80	80	7.397	37.028	1.521	21	3.85	4	3.12	NaN	NaN	NaN	NaN	NaN	NaN	NaN	NaN	NaN	NaN	NaN	NaN	NaN	NaN	NaN	NaN	NaN	NaN	NaN	NaN	NaN	NaN	NaN
14.75	114.69	0.299	0.290757	0.00611156	0.00162459	80	80	7.406	37.021	2.166	21	3.85	4	3.12	NaN	NaN	NaN	NaN	NaN	NaN	NaN	NaN	NaN	NaN	NaN	NaN	NaN	NaN	NaN	NaN	NaN	NaN	NaN	NaN	NaN	NaN	NaN
15	114.35	0.299	0.287725	0.00924807	0.00245835	80	80	7.424	36.998	3.16	21	3.85	4	3.12	NaN	NaN	NaN	NaN	NaN	NaN	NaN	NaN	NaN	NaN	NaN	NaN	NaN	NaN	NaN	NaN	NaN	NaN	NaN	NaN	NaN	NaN	NaN
15.25	113.806	0.299	0.284114	0.011805	0.00313804	80	80	7.44	36.982	3.961	21	3.85	4	3.12	NaN	NaN	NaN	NaN	NaN	NaN	NaN	NaN	NaN	NaN	NaN	NaN	NaN	NaN	NaN	NaN	NaN	NaN	NaN	NaN	NaN	NaN	NaN
15.5	114.651	0.299	0.280666	0.0140739	0.00374117	80	80	7.451	36.979	4.891	21	3.85	4	3.12	NaN	NaN	NaN	NaN	NaN	NaN	NaN	NaN	NaN	NaN	NaN	NaN	NaN	NaN	NaN	NaN	NaN	NaN	NaN	NaN	NaN	NaN	NaN
15.75	114.189	0.299	0.277782	0.0171028	0.00454631	80	80	7.461	36.983	5.653	21	3.85	4	3.12	NaN	NaN	NaN	NaN	NaN	NaN	NaN	NaN	NaN	NaN	NaN	NaN	NaN	NaN	NaN	NaN	NaN	NaN	NaN	NaN	NaN	NaN	NaN
16	115.026	0.299	0.274554	0.0196307	0.00521829	80	80	7.466	37.003	6.585	21	3.85	4	3.12	NaN	NaN	NaN	NaN	NaN	NaN	NaN	NaN	NaN	NaN	NaN	NaN	NaN	NaN	NaN	NaN	NaN	NaN	NaN	NaN	NaN	NaN	NaN
16.25	115.602	0.299	0.270584	0.0219929	0.0058462	80	80	7.474	37.001	7.508	21	3.85	4	3.12	NaN	NaN	NaN	NaN	NaN	NaN	NaN	NaN	NaN	NaN	NaN	NaN	NaN	NaN	NaN	NaN	NaN	NaN	NaN	NaN	NaN	NaN	NaN
16.5	115.666	0.299	0.269351	0.0238363	0.00633623	80	80	7.47	36.989	8.145	21	3.85	4	3.12	NaN	NaN	NaN	NaN	NaN	NaN	NaN	NaN	NaN	NaN	NaN	NaN	NaN	NaN	NaN	NaN	NaN	NaN	NaN	NaN	NaN	NaN	NaN
16.75	115.204	0.303	0.269812	0.0261535	0.0069522	80	80	7.467	36.998	8.775	21	3.85	4	3.12	NaN	NaN	NaN	NaN	NaN	NaN	NaN	NaN	NaN	NaN	NaN	NaN	NaN	NaN	NaN	NaN	NaN	NaN	NaN	NaN	NaN	NaN	NaN
17	116.159	0.299	0.263737	0.026455	0.00703234	80	80	7.46	37.009	9.25	21	3.85	4	3.12	NaN	NaN	NaN	NaN	NaN	NaN	NaN	NaN	NaN	NaN	NaN	NaN	NaN	NaN	NaN	NaN	NaN	NaN	NaN	NaN	NaN	NaN	NaN
17.25	116.248	0.301	0.26416	0.0287063	0.0076308	80	80	7.451	37.013	9.687	21	3.85	4	3.12	NaN	NaN	NaN	NaN	NaN	NaN	NaN	NaN	NaN	NaN	NaN	NaN	NaN	NaN	NaN	NaN	NaN	NaN	NaN	NaN	NaN	NaN	NaN
17.5	117.21	0.299	0.261443	0.0299448	0.00796002	80	80	7.439	37.029	9.979	21	3.85	4	3.12	NaN	NaN	NaN	NaN	NaN	NaN	NaN	NaN	NaN	NaN	NaN	NaN	NaN	NaN	NaN	NaN	NaN	NaN	NaN	NaN	NaN	NaN	NaN
17.75	115.981	0.3	0.261577	0.0300346	0.00798387	80	80	7.422	37.031	10.065	21	3.85	4	3.12	NaN	NaN	NaN	NaN	NaN	NaN	NaN	NaN	NaN	NaN	NaN	NaN	NaN	NaN	NaN	NaN	NaN	NaN	NaN	NaN	NaN	NaN	NaN
18	119.472	0.299	0.260047	0.0322797	0.00858068	80	80	7.415	37.014	10.313	21	3.85	4	3.12	NaN	NaN	NaN	NaN	NaN	NaN	NaN	NaN	NaN	NaN	NaN	NaN	NaN	NaN	NaN	NaN	NaN	NaN	NaN	NaN	NaN	NaN	NaN
18.25	118.129	0.299	0.260058	0.0306953	0.00815952	80	80	7.402	37.013	10.266	21	3.85	4	3.12	NaN	NaN	NaN	NaN	NaN	NaN	NaN	NaN	NaN	NaN	NaN	NaN	NaN	NaN	NaN	NaN	NaN	NaN	NaN	NaN	NaN	NaN	NaN
18.5	116.279	0.299	0.26055	0.0302542	0.00804225	80	80	7.386	36.999	10.221	21	3.85	4	3.12	NaN	NaN	NaN	NaN	NaN	NaN	NaN	NaN	NaN	NaN	NaN	NaN	NaN	NaN	NaN	NaN	NaN	NaN	NaN	NaN	NaN	NaN	NaN
18.75	116.578	0.3	0.261638	0.0312742	0.00831338	80	80	7.375	36.969	10.056	21	3.85	4	3.12	NaN	NaN	NaN	NaN	NaN	NaN	NaN	NaN	NaN	NaN	NaN	NaN	NaN	NaN	NaN	NaN	NaN	NaN	NaN	NaN	NaN	NaN	NaN
19	116.02	0.299	0.261053	0.0293439	0.00780027	80	80	7.367	36.977	9.86	21	3.85	4	3.12	NaN	NaN	NaN	NaN	NaN	NaN	NaN	NaN	NaN	NaN	NaN	NaN	NaN	NaN	NaN	NaN	NaN	NaN	NaN	NaN	NaN	NaN	NaN
19.25	116.626	0.299	0.261712	0.029199	0.00776176	80	80	7.353	37.008	9.756	21	3.85	4	3.12	NaN	NaN	NaN	NaN	NaN	NaN	NaN	NaN	NaN	NaN	NaN	NaN	NaN	NaN	NaN	NaN	NaN	NaN	NaN	NaN	NaN	NaN	NaN
19.5	115.903	0.299	0.298856	0.00011362	3.02028e-05	80	80	7.349	37.017	0.038	21	3.85	4	3.12	NaN	NaN	NaN	NaN	NaN	NaN	NaN	NaN	NaN	NaN	NaN	NaN	NaN	NaN	NaN	NaN	NaN	NaN	NaN	NaN	NaN	NaN	NaN
[truncated: 8,234 more rows]
